# Supplementary material for: Profiling myelodysplastic syndromes by mass cytometry demonstrates abnormal progenitor cell phenotype and differentiation
Source: PubMed Central journal article supplement — Cytometry B Clin Cytom. 2020 Jan 9;98(2):131–45. doi: 10.1002/cyto.b.21860 (PMC9292828; doi:10.1002/cyto.b.21860), 2020-01-09
Supplement: CYTO-98-131-s002.pdf [file CYTO-98-131-s002.pdf]

**Supplemental Table1:** Antibodies used in this study. The staining panel (A, B, or both) is indicated for each. The “Analyses” column indicates whether the marker was used for each dimensionality reduction analysis (S, SPADE analysis; V, viSNE analysis; B, multidimensional binning; X, X-shift clustering). Only markers measured in both panels had sufficient normal replicates for calculation of CVs. Calreticulin and cleaved-PARP did not have sufficient signal to calculate CV.

| Antigen            | Conjugate | Clone    | Concentration   | Manufacturer   | Panel | CV (%) | Analyses       |
|--------------------|-----------|----------|-----------------|----------------|-------|--------|----------------|
| CD3                | In-113    | UCHT1    | 2 µg/mL         | Biologend      | A & B | 13.2   | S, V, B, X     |
| CD45               | In-115    | HI30     | 2 µg/mL         | Biologend      | A & B | 11.0   | S, V, B, X     |
| CD45RA             | La-139    | HI100    | 1.5 µg/mL       | Biologend      | A & B | 18.8   | V, B, X        |
| CD133              | Pr-141    | AC133    | 3 µg/mL         | Milteney       | A     | N/A    |                |
| cleaved-Caspase3   | Pr-141    | C92-605  | 3 µg/mL         | BD bioscience  | B     | N/A    | Intra-cellular |
| CD7                | Nd-142    | M-T701   | 2 µg/mL         | BD Biosciences | A & B | 7.1    | S, V, B, X     |
| CD71               | Nd-143    | R17217   | 2 µg/mL         | eBiosciences   | A & B | 18.2   | S, V, B, X     |
| CD235              | Nd-144    | HIR2     | 6 µg/mL         | Biologend      | A & B | 24.4   | S, V, B, X     |
| CD47               | Nd-145    | B6H12    | 1.5 µg/mL       | BD Biosciences | A & B | 13.2   | V, B, X        |
| CD8                | Nd-146    | RPA-T8   | 1 µg/mL         | Biologend      | A & B | 4.6    | S, V, B, X     |
| CD56               | Sm-147    | NCAM16.2 | 1.5 µg/mL       | BD Biosciences | A & B | 4.6    | V, B, X        |
| CD34               | Nd-148    | 8G12     | 3 µg/mL         | BD Biosciences | A & B | 6.5    | S, V, B, X     |
| CD90               | Sm-149    | 5E10     | 3 µg/mL         | Biologend      | A & B | 16.7   | V, B, X        |
| CD117              | Nd-150    | 104D2    | 1 µg/mL         | Biologend      | A & B | 17.5   | V, B, X        |
| CD123              | Eu-151    | 6H6      | 1 µL per 100 µL | DVS            | A & B | 8.9    | S, V, B, X     |
| CD33               | Sm-152    | P67.6    | 1.5 µg/mL       | BD Biosciences | A & B | 6.3    | S, V, B, X     |
| HLA-DR             | Eu-153    | L243     | 2 µg/mL         | Biologend      | A & B | 10.5   | S, V, B, X     |
| CD64               | Sm-154    | 10.1     | 2 µg/mL         | Biologend      | A & B | 4.9    | V, B, X        |
| CD44               | Gd-156    | G44-26   | 1.5 µg/mL       | BD Biosciences | A & B | 17.8   | V, B, X        |
| Ki-67              | Gd-158    | SolA15   | 1 µg/mL         | eBiosciences   | A & B | 13.3   | Intra-cellular |
| CD38               | Tb-159    | HIT2     | 1 µg/mL         | Biologend      | A & B | 9.0    | S, V, B, X     |
| CD14               | Gd-160    | M5E2     | 2 µg/mL         | Biologend      | A & B | 16.7   | S, V, B, X     |
| CD16               | Dy-161    | 3G8      | 2 µg/mL         | Biologend      | A & B | 15.5   | S, V, B, X     |
| CD11b              | Dy-162    | ICRF44   | 2 µg/mL         | Biologend      | A & B | 9.7    | S, V, B, X     |
| CD15               | Dy-164    | W6D3     | 3 µg/mL         | Biologend      | A & B | 20.6   | S, V, B, X     |
| Calreticulin       | Ho-165    | FMC75    | 4 µg/mL         | Thermo Fisher  | A & B | N/A    |                |
| CD321              | Er-166    | WK9      | 3 µg/mL         | eBiosciences   | A & B | 10.7   | S, V, B, X     |
| CD99               | Er-167    | HCD99    | 0.5 µg/mL       | Biologend      | A & B | 10.8   | V, B, X        |
| CD13               | Er-168    | L138     | 2 µg/mL         | BD Biosciences | A & B | 6.6    | V, B, X        |
| cleaved-PARP(D214) | Yb-171    | F21-852  | 1 µg/mL         | BD Biosciences | A & B | N/A    | Intra-cellular |
| CD10               | Yb-172    | HI10a    | 3 µg/mL         | Biologend      | A & B | 7.8    | S, V, B, X     |
| CD19               | Yb-173    | H1B19    | 2 µg/mL         | BD Biosciences | A & B | 7.5    | S, V, B, X     |
| CD20               | Yb-174    | 2H7      | 2 µg/mL         | Biologend      | A & B | 14.6   | S, V, B, X     |
| CXCR4              | Yb-175    | 12G5     | 1uL per test    | DVS            | A & B | 14.5   | V, B, X        |
| CD69               | Yb-176    | FN50     | 1 µg/mL         | BD Biosciences | A & B | 7.6    | V, B, X        |

**Supplemental Table 2:** Clinical characteristics of MDS patients tested in this study. Survival time is from time of sample collection. "Alive" indicates patients alive at last follow-up (average follow of 53 months). Asterisks indicate serial samples from the same patient. "HSCT" denotes patients who received a hematopoietic stem cell transplant. "N/A" indicates follow not available.

| Patient                                                  | Sex | Age | Cytogenetics                  | FAB               | WHO               | IPSS            | Blast %                  | Survival (mo.) |
|----------------------------------------------------------|-----|-----|-------------------------------|-------------------|-------------------|-----------------|--------------------------|----------------|
| <b>IPSS High Risk</b>                                    |     |     |                               |                   |                   |                 |                          |                |
| MDS4                                                     | M   | 73  | del5q, del8q, Trisomy8        | RAEB-T            | AML               | High/3.5        | 26%                      | 14             |
| MDS15                                                    | F   | 71  | Monosomy 7                    | AML (from CMML-2) | AML (from CMML-2) | High            | 32%                      | 2.6            |
| MDS17                                                    | M   | 69  | Normal                        | RAEB-T            | AML               | High            | 25%                      | 28.5           |
| <b>IPSS Intermediate-2 Risk</b>                          |     |     |                               |                   |                   |                 |                          |                |
| MDS1                                                     | M   | 80  | Normal                        | RAEB              | RAEB-2            | Int-2/2         | 16%                      | 12.9           |
| MDS2                                                     | M   | 80  | Normal                        | RAEB              | RAEB-2            | INT-2/2.0       | 15%                      | 1.5            |
| MDS3*                                                    | M   | 74  | Trisomy 8, Trisomy 9          | RAEB              | RAEB-1            | INT-2/1.5       | 10-18%                   | 18             |
| MDS13*                                                   | M   | 74  | Trisomy 8, Trisomy 9          | RAEB              | RAEB-2            | INT-2/1.5       | 10.2%                    | 16             |
| MDS16                                                    | M   | 67  | Normal                        | RAEB              | RAEB-2            | INT-2/2.0       | 15-20%                   | 5.8, HSCT      |
| MDS21*                                                   | M   | 75  | Trisomy 8, Trisomy 9          | RAEB              | RAEB-2            | Int2/1.5        | 6% (following treatment) | 9.2            |
| MDS26                                                    | F   | 65  | del5q and del13q              | MDS/MPN           | MDS NOS           | INT-2/1.5       | 4.70%                    | Alive          |
| MDS27                                                    | M   | 69  | Normal (-Y)                   | RAEB              | RAEB-2            | INT-2           | 2% (following treatment) | 10.5           |
| <b>IPSS Intermediate-1 Risk</b>                          |     |     |                               |                   |                   |                 |                          |                |
| MDS5                                                     | M   | 67  | Normal                        | RA                | RCMD              | INT-1/1.0       | <5%                      | Alive; HSCT    |
| MDS6                                                     | M   | 52  | Normal                        | RAEB              | RAEB-1            | INT-1/1.0       | 5-7%                     | Alive          |
| MDS8                                                     | F   | 56  | Normal                        | RARS              | RCMD-RS           | INT-1/0.5       | <5%                      | 39.5           |
| MDS12                                                    | M   | 65  | Normal                        | RA                | RCMD              | INT-1/0.5       | <5%                      | Alive          |
| MDS14                                                    | F   | 58  | Normal (Trisomy 15 sub-clone) | RA                | RCMD              | INT-1/1.0       | <5%                      | Alive          |
| MDS23                                                    | M   | 78  | Normal (-Y)                   | RA                | RCMD              | Int-1/0.5       | <5%                      | Alive          |
| <b>IPSS Low Risk</b>                                     |     |     |                               |                   |                   |                 |                          |                |
| MDS9                                                     | M   | 69  | Normal (-Y)                   | RA                | RCMD              | LOW/0 (post-tx) | 4.4%                     | 40.5, HSCT     |
| MDS11                                                    | M   | 29  | Normal                        | RA                | RA                | Low             | 0%                       | Alive          |
| MDS19                                                    | M   | 81  | Normal                        | RARS              | RCMD-RS           | LOW/0           | <5%                      | Alive          |
| MDS20                                                    | F   | 83  | Normal                        | RA                | RCMD              | LOW/0           | <5%                      | 29.4           |
| MDS25                                                    | F   | 66  | Normal                        | RA                | RCMD              | LOW             | <5%                      | Alive          |
| MDS28                                                    | M   | 78  | Normal                        | CMML              | CMML-1            | LOW/0           | <5%                      | Alive          |
| <b>Idiopathic Cytopenia of Undetermined Significance</b> |     |     |                               |                   |                   |                 |                          |                |
| ICUS18                                                   | M   | 71  | Normal                        | N/A               | N/A               | N/A             | <5%                      | N/A            |
| ICUS22                                                   | M   | 59  | Normal                        | N/A               | N/A               | N/A             | 0%                       | N/A            |
| ICUS24                                                   | F   | 26  | Normal                        | N/A               | N/A               | N/A             | <5%                      | N/A            |

**Supplemental Table 3:** Median expression of each surface marker on each cell population.

**Supplemental Table 3:** Median expression of each surface marker on each cell population. The expression level of each marker is shown for each gated cell population. Expression level is shown in median ion counts detected. Each cell is colored from green (lowest expression) to red (highest expression). Samples 3, 5, and 21 were run twice due to lower numbers of cell events in the first run. MDS samples 3, 13, and 21 come from the same patient tested on three separate bone marrow aspirations each several months apart. \*Indicates samples from patients with CMML or an MDS/MPN overlap syndrome.

|             |             | CD45RA Median |                                      |       |      |         |                   |              |                   |                  |               |            |                 |                     |                   |               |                    |             |                |              |         |          |      |           |           |              |                |
|-------------|-------------|---------------|--------------------------------------|-------|------|---------|-------------------|--------------|-------------------|------------------|---------------|------------|-----------------|---------------------|-------------------|---------------|--------------------|-------------|----------------|--------------|---------|----------|------|-----------|-----------|--------------|----------------|
|             |             | Ungated       | CD34 <sup>+</sup> CD38 <sup>hi</sup> | HSCs  | MPP  | CMP/GMP | Myelo/Mono-Blasts | ProMonocytes | CD14neg Monocytes | Mature Monocytes | ProMyelocytes | Myelocytes | Meta-Myelocytes | Mature Granulocytes | ProErythro-blasts | Erythroblasts | Late Erythroblasts | Pre-B cells | Mature B cells | Plasma Cells | T cells | NK cells | pDCs | Basophils | Platelets | CD8+ T cells | CD8neg T cells |
| AML/RAEB-T  | Run1_MDS17  | 1.35          | 0.69                                 | 0.5   | 0.41 | 1.03    | 0.53              | 1.74         | 1.98              | 1.61             | 1.17          | 3          | 2.5             | 2.71                | 1.27              | 1.23          | 1.05               | 1.2         | 4.52           | 2.18         | 1.34    | 3.02     | 1.73 | 1.3       | 0.31      | 1.6          | 1.03           |
|             | Run2_MDS15* | 1.52          | 1.33                                 | 0.68  | 0.68 | 0.97    | 1.26              | 1.79         | 1.72              | 1.68             | 1.47          | 1.63       | 1.53            | 1.34                | 2.27              | 2.96          | 2.79               | 1.66        | 5.96           | 3.57         | 1.39    | 2.93     | 1.84 | 1.03      | 1.11      | 2.12         | 0.86           |
|             | Run2_MDS4   | 1.45          | 1.06                                 | 0.64  | 0.43 | 0.99    | 0.95              | 1.47         | 1.95              | 3.11             | 1.68          | 1.51       | 1.52            | 1.65                | 2.11              | 3.81          | 1.19               | 1.23        | 1.81           | 3.43         | 1.05    | 1.63     | 1.27 | 1.01      | 0.34      | 1.33         | 0.86           |
| Higher Risk | Run1_MDS21  | 1.1           | 0.77                                 | 0.66  | 0.47 | 0.86    | 0.78              | 1.42         | 1.32              | 1.55             | 0.63          | 0.82       | 0.93            | 1.32                | 1.69              | 2.4           | 4.17               | 1.93        | 6.23           | 1.61         | 1.32    | 3.42     | 1.51 | 0.56      | 1.85      | 2.79         | 0.9            |
|             | Run1_MDS3   | 1.19          | 0.79                                 | 0.59  | 0.39 | 0.88    | 0.85              | 1.8          | 1.66              | 2.58             | 0.88          | 1.17       | 1.28            | 1.77                | 1.29              | 1.7           | 2.09               | 2.53        | 6.53           | 2.72         | 1.53    | 4.12     | 2.56 | 1.01      | 0.98      | 3.09         | 1.06           |
|             | Run2_MDS13  | 1.1           | 0.77                                 | 0.56  | 0.5  | 0.88    | 0.84              | 1.57         | 2.49              | 2.65             | 0.91          | 1.36       | 1.62            | 1.65                | 1.45              | 1.24          | 0.99               | 1.24        | 3.21           | 2.23         | 1.24    | 2.39     | 1.85 | 0.93      | 0.46      | 2.02         | 0.9            |
|             | Run2_MDS16  | 0.98          | 0.82                                 | 0.58  | 0.55 | 0.8     | 1.55              | 1.57         | 1.48              | 1.47             | 0.79          | 0.64       | 0.69            | 0.73                | 1.28              | 2.12          | 1.21               | 1.38        | 2.53           | 1.46         | 1.37    | 3.88     | 1.81 | 0.58      | 0.87      | 2.47         | 1.17           |
|             | Run2_MDS1   | 0.89          | 0.77                                 | 0.32  | 0.51 | 0.86    | 0.68              | 0.99         | 1.13              | 1.68             | 0.67          | 0.65       | 0.84            | 1.02                | 0.94              | 1.95          | 1.54               | 0.9         | 2.89           | 2.11         |         | 2.27     | 0.93 | 1.03      | 0.33      | 1.01         | 0.73           |
|             | Run2_MDS21  | 0.87          | 0.65                                 | 0.43  | 0.44 | 0.75    | 0.67              | 0.96         | 1.09              | 1.01             | 0.81          | 0.96       | 0.94            | 0.95                | 1.01              | 1.02          | 0.92               | 1.31        | 3.55           | 0.8          | 1.03    | 1.87     | 0.77 | 0.58      | 0.87      | 1.83         | 0.77           |
|             | Run2_MDS28* | 0.62          | 0.71                                 | 0.49  | 0.44 | 1.07    | 0.64              | 0.74         | 0.95              | 0.61             | 0.41          | 0.41       | 0.56            | 0.62                | 1.19              | 1.66          | 1.14               | 0.62        | 1.72           | 1.58         | 1.12    | 2.37     | 0.62 | 0.68      | 0.44      | 1.4          | 0.98           |
|             | Run2_MDS27  | 1.28          | 0.95                                 | 0.66  | 0.59 | 0.92    | 1.14              | 1.62         | 1.79              | 1.68             | 0.88          | 0.83       | 0.84            | 1.01                | 1.39              | 2.53          | 0.91               | 1.04        | 3.17           | 2.44         | 0.85    | 3.23     | 3.08 | 1.26      | 1.44      | 1            | 0.67           |
|             | Run2_MDS2   | 1.32          | 0.49                                 | 0.36  | 0.21 | 0.51    | 0.56              | 1.71         | 2.04              | 4.98             | 1.53          | 0.99       | 1.89            | 2.16                | 2.35              | 2.95          | 1.23               | 0.92        | 7.45           | -0.08        | 0.73    | 1.57     | 2.59 | 0.75      | 0.23      | 1.43         | 0.69           |
|             | Run2_MDS3   | 1.27          | 0.68                                 | 0.56  | 0.47 | 0.81    | 0.8               | 1.88         | 2.35              | 1.92             | 1.48          | 2          | 2.04            | 2.35                | 0.97              | 1.01          | 0.73               | 1.58        | 3.78           | 1.1          | 1.14    | 2.57     | 1.94 | 1         | 0.69      | 2.11         | 0.84           |
|             | Run1_MDS23  | 1.39          | 1.02                                 | 0.81  | 0.53 | 1.52    | 1.69              | 2.54         | 2.37              | 2.13             | 1.83          | 1.31       | 1.26            | 1.26                | 1.72              | 2.28          | 2.44               | 1.8         | 4.08           | 0.79         | 0.96    | 4.91     | 2.4  | 0.99      | 0.97      | 1.29         | 0.86           |
|             | Run1_MDS25  | 1.93          | 1.82                                 | 0.04  | 0.39 | 0.6     | 1.41              | 1.1          | 0.83              | 0.8              | 0.86          | 0.7        | 0.74            | 0.82                | 2.39              | 3.33          | 2.42               | 1.51        | 6.51           | 2.83         | 1.45    | 4.6      | 2.92 | 0.74      | 0.65      | 1.95         | 1.03           |
| Run1_MDS5   | 1.09        | 1.91          | 0.08                                 | 0.9   | 1.75 | 2.52    | 2.14              | 3.27         | 2.22              | 1.65             | 1.24          | 1.64       | 1.87            | 4.35                | 4.23              | 2.11          | 2.35               | 5.38        | 3.42           | 1.39         | 5.99    | 3.81     | 1.76 | 0.55      | 1.55      | 1.32         |                |
| Run1_MDS6   | 1.87        | 1.24          | 0.47                                 | 0.75  | 1.34 | 1.79    | 2.06              | 2.13         | 2.17              | 1.76             | 1.48          | 1.75       | 1.72            | 3.65                | 4.19              | 2.81          | 2.5                | 5.72        | 3.64           | 1.73         | 5.66    | 3.08     | 1.7  | 2.13      | 1.96      | 1.54         |                |
| Run1_MDS8   | 1.28        | 2.53          | 0.66                                 | 0.3   | 1.15 | 2.1     | 2.57              | 1.85         | 1.95              | 0.95             | 0.85          | 0.93       | 0.99            | 4.4                 | 4.69              | 3.44          | 2.34               | 4.76        | 7.8            | 1.96         | 4.57    | 2.95     | 1.06 | 1.58      | 2.62      | 1.77         |                |
| Run1_MDS9   | 1.34        | 1.2           | 0.77                                 | 0.65  | 1.52 | 1.64    | 2.64              | 1.7          | 1.02              | 1.06             | 0.89          | 0.98       | 1.06            | 3.18                | 4.34              | 2.97          | 1.96               | 4.24        | 2.27           | 1.4          | 5.44    | 2.94     | 1.53 | 0.76      | 2.15      | 1.05         |                |
| Run2_MDS12  | 1.07        | 1.53          | 0.44                                 | 0.93  | 1.32 | 1.41    | 1.38              | 1.38         | 1.33              | 0.86             | 0.9           | 1.02       | 1.06            | 1.58                | 1.76              | 1.33          | 1.27               | 3.33        | 0.68           | 0.79         | 2.72    | 1.69     | 0.78 | 0.92      | 1.09      | 0.62         |                |
| Run2_MDS14  | 1.03        | 1.94          | 0.58                                 | 2.13  | 0.38 | 1.71    | 1.75              | 1.73         | 1.81              | 0.94             | 0.85          | 0.91       | 0.86            | 1.89                | 2.36              | 1.52          | 1.21               | 2.83        | 1.71           | 0.89         | 3.97    | 1.54     | 0.79 | 0.94      | 1.48      | 0.69         |                |
| Run2_MDS19  | 0.97        | 0.86          | 0.34                                 | 0.61  | 0.99 | 1.61    | 1.53              | 1.33         | 1.3               | 0.9              | 0.85          | 0.9        | 0.91            | 1.45                | 2.37              | 1.35          | 1.26               | 3.7         | 1.17           | 0.89         | 3.09    | 2.07     | 0.61 | 1.18      | 1.76      | 0.71         |                |
| Run2_MDS20  | 1.71        | 1.07          | 1.07                                 | -0.1  | 0.88 | 1.56    | 1.7               | 1.53         | 1.71              | 1.52             | 1.56          | 1.56       | 1.68            | 1.85                | 2.16              | 2.24          | 1.88               | 4.65        | 2.04           | 1.83         | 2.63    | 2.32     | 1.2  | 0.69      | 2.02      | 1.81         |                |
| Run2_MDS28* | 2.51        | 1.08          | 0.82                                 | 0.49  | 1.02 | 2.67    | 3.37              | 3.35         | 3.77              | 3.39             | 2.8           | 2.72       | 2.32            | 1.97                | 1.57              | 2.94          | 2.41               | 2.83        | 1.07           | 0.98         | 2.99    | 2.77     | 1.09 | 1.98      | 1.17      | 0.85         |                |
| Run2_MDS5   | 1.75        | 2.98          | -0.2                                 | -0.15 | 1.15 | 2.21    | 1.7               | 2.98         | 2.46              | 1.24             | 1.27          | 1.37       | 1.73            | 4.13                | 2.9               | 2.15          | 2.62               | 2.94        | 3.35           | 1.12         | 4.02    | 1.48     | 1.36 | 0.75      | 1.25      | 1.04         |                |
| ICUS        | Run1_ICUS18 | 1.31          | 1.54                                 | 0.87  | 0.85 | 1.3     | 2.18              | 1.76         | 1.57              | 1.44             | 1.22          | 0.94       | 1.02            | 1.09                | 2.38              | 1.94          | 1.65               | 2.09        | 4.59           | 1.61         | 1.55    | 5.1      | 4.14 | 0.58      | 0.97      | 2.05         | 1.44           |
|             | Run1_ICUS22 | 1.09          | 1.04                                 | 0.73  | 0.63 | 1.21    | 1.7               | 1.68         | 1.25              | 1.21             | 1.21          | 0.98       | 0.96            | 0.98                | 2.39              | 2.71          | 1.7                | 1.55        | 4.17           | 1.19         | 1.03    | 4.2      | 2.85 | 1.31      | 0.6       | 1.32         | 0.93           |
|             | Run1_ICUS24 | 1.15          | 1.09                                 | 0.88  | 0.57 | 1.35    | 1.6               | 1.75         | 1.45              | 1.44             | 1.19          | 0.93       | 0.95            | 0.93                | 2.48              | 2.35          | 2.65               | 1.47        | 3.63           | 1.15         | 1.19    | 4.49     | 2.31 | 0.92      | 2.37      | 1.53         | 0.97           |
| Normal      | Run1_NI-1   | 1.07          | 0.94                                 | 0.66  | 0.58 | 1.16    | 1.85              | 1.76         | 1.59              | 1.35             | 1.07          | 0.81       | 0.82            | 0.85                | 2.2               | 2.35          | 1.91               | 1.45        | 3.38           | 1.53         | 1.98    | 5.89     | 3.16 | 1.8       | 3.38      | 2.82         | 1.65           |
|             | Run1_NI-3   | 1.34          | 1.2                                  | 0.53  | 0.65 | 1.07    | 1.98              | 4.14         | 4.79              | 3.14             | 1.04          | 0.91       | 1.18            | 1.2                 | 2.6               | 1.91          | 1.81               | 1.78        | 2.72           | 1.55         | 1.48    | 5.43     | 2.96 | 1.01      | 0.38      | 2.14         | 1.14           |
|             | Run1_NI-4   | 1.42          | 1.65                                 | 0.63  | 0.77 | 1.2     | 2.06              | 4.95         | 5.27              | 3.42             | 1.06          | 0.97       | 1.22            | 1.26                | 2.71              | 2.11          | 1.73               | 2.22        | 4.07           | 2.46         | 1.8     | 5.71     | 2.55 | 1.01      | 0.25      | 2.56         | 1.3            |
|             | Run1_NI-6   | 1.31          | 0.98                                 | 0.52  | 0.53 | 1.13    | 1.92              | 4.51         | 4.78              | 3.69             | 1.09          | 0.96       | 1.19            | 1.19                | 2.43              | 2.01          | 1.64               | 1.52        | 2.87           | 1.88         | 1.15    | 4.17     | 2.7  | 0.88      | 0.3       | 1.55         | 1.04           |
|             | Run2_NI-3   | 1.04          | 0.77                                 | 0.84  | 0.27 | 0.77    | 1.63              | 2.89         | 3.04              | 2.21             | 0.85          | 0.8        | 0.96            | 0.99                | 1.48              | 1.39          | 1.26               | 1.26        | 1.92           | 1.26         | 1.08    | 3.26     | 1.88 | 0.7       | 0.44      | 1.6          | 0.81           |
|             | Run2_NI-4   | 1.15          | 1.11                                 | 0.62  | 0.55 | 1.04    | 1.9               | 3.47         | 3.44              | 2.55             | 0.93          | 0.83       | 1.05            | 1.08                | 1.65              | 1.5           | 1.37               | 1.63        | 2.86           | 1.8          | 1.33    | 3.4      | 1.83 | 0.67      | 0.2       | 1.83         | 1              |
| Run2_NI-5   | 1.15        | 0.81          | 0.49                                 | 0.54  | 0.92 | 1.53    | 2.89              | 3.04         | 2.47              | 0.75             | 0.78          | 0.97       | 1.05            | 1.66                | 1.48              | 1.26          | 1.06               | 2.26        | 1.22           | 1.42         | 4.19    | 1.85     | 0.68 | 0.28      | 2.06      | 0.98         |                |
| Run2_NI-6   | 0.94        | 0.75          | 0.61                                 | 0.52  | 0.77 | 1.61    | 3.08              | 3.11         | 2.49              | 0.76             | 0.74          | 0.89       | 0.92            | 1.32                | 1.22              | 0.99          | 1.01               | 1.64        | 1.63           | 0.89         | 2.55    | 1.73     | 0.66 | 0.36      | 1.16      | 0.79         |                |

Supplemental Table 3: Median expression of each surface marker on each cell population.

|             |             | CD7 Median |              |       |       |         |                   |              |                   |                  |               |            |                |             |                  |               |                   |           |                |              |         |          |       |           |           |              |                |
|-------------|-------------|------------|--------------|-------|-------|---------|-------------------|--------------|-------------------|------------------|---------------|------------|----------------|-------------|------------------|---------------|-------------------|-----------|----------------|--------------|---------|----------|-------|-----------|-----------|--------------|----------------|
|             |             | Ungated    | CD34-CD38low | HSCs  | MPP   | CMP/GMP | Myelo/Mono-Blasts | ProMonocytes | CD14neg Monocytes | Mature Monocytes | ProMyelocytes | Myelocytes | MetaMyelocytes | MatureGrans | ProErythroblasts | Erythroblasts | LateErythroblasts | PreBCells | Mature B cells | Plasma Cells | T cells | NK cells | pDCs  | Basophils | Platelets | CD8+ T cells | CD8neg T cells |
| AML/RAEB-T  | Run1_MDS17  | 0.41       | 0.48         | 0.55  | 0.42  | 1.32    | 0.48              | -0.06        | -0.16             | -0.14            | -0.2          | 0          | -0.02          | 0.1         | 2.3              | 1.47          | 0.57              | 0.35      | -0.32          | 0.13         | 13.15   | 46.63    | 4.5   | 0.37      | 0.45      | 12.01        | 15.9           |
|             | Run2_MDS15* | -0.11      | 0.77         | 0.51  | 0.5   | 0.61    | 0.02              | -0.18        | -0.22             | -0.2             | -0.24         | -0.23      | -0.24          | -0.02       | 1.64             | 1.42          | 0.54              | -0.17     | -0.18          | 0.03         | 21.86   | 137.58   | 0.44  | -0.15     | 0.6       | 31.7         | 13.81          |
|             | Run2_MDS4   | 0.08       | 4.2          | 1.04  | 13.09 | 1.01    | -0.11             | -0.23        | -0.2              | -0.15            | -0.25         | -0.27      | -0.27          | -0.25       | 1.02             | 0.99          | 0                 | 0.41      | 0.05           | -0.17        | 19.39   | 147.26   | 21.25 | -0.1      | 0.74      | 22.35        | 15.81          |
| Higher Risk | Run1_MDS21  | 0.76       | 0.58         | 0.52  | 0.55  | 0.9     | 0.76              | 0.17         | -0.25             | -0.28            | -0.29         | -0.21      | -0.19          | -0.1        | 2.2              | 2.78          | 2.77              | -0.21     | -0.21          | 0.21         | 22      | 146.67   | 7.8   | -0.01     | 1.74      | 30.45        | 18.84          |
|             | Run1_MDS3   | 0.45       | 0.33         | 0.16  | 0.31  | 0.57    | 0.41              | 0.13         | -0.09             | -0.28            | -0.28         | -0.18      | -0.15          | -0.02       | 1.19             | 1.62          | 1.21              | -0.22     | -0.2           | 0            | 26.05   | 154.8    | 4.96  | -0.14     | 0.84      | 36.59        | 22.01          |
|             | Run2_MDS13  | 0.2        | 0.28         | 0.3   | 0.26  | 0.37    | 0.18              | -0.16        | -0.16             | 0.09             | -0.21         | -0.15      | -0.18          | -0.17       | 0.93             | 1.18          | 0.17              | -0.23     | -0.31          | 0.07         | 23.08   | 145.75   | -0.39 | -0.17     | 0.33      | 30.48        | 20.1           |
|             | Run2_MDS16  | 0.23       | 0.4          | 0.32  | 0.32  | 0.27    | -0.09             | -0.17        | -0.26             | -0.22            | -0.13         | -0.29      | -0.25          | -0.24       | 1.39             | 3.44          | 0.23              | -0.22     | -0.3           | 0.12         | 38.03   | 125.16   | -0.02 | -0.28     | 0.79      | 44.21        | 36.76          |
|             | Run2_MDS1   | -0.05      | -0.12        | -0.28 | -0.16 | -0.12   | -0.22             | -0.24        | -0.28             | -0.24            | -0.32         | -0.37      | -0.26          | -0.2        | 0.66             | 0.78          | 0.04              | 0.51      | -0.13          | -0.1         | 14.6    | 70.91    | -0.22 | -0.31     | 0.36      | 12.3         | 15.21          |
|             | Run2_MDS21  | 0.32       | 0.21         | 0.39  | 0.2   | 0.55    | 0.31              | -0.22        | -0.23             | -0.16            | -0.21         | -0.18      | -0.22          | -0.18       | 0.71             | 1.04          | 0.07              | -0.23     | -0.21          | -0.02        | 17.25   | 68.03    | 6.23  | 0.23      | 0.92      | 25.52        | 14.63          |
|             | Run2_MDS26* | -0.24      | 0.16         | 0.14  | 0.1   | 0.34    | -0.15             | -0.31        | -0.24             | 0.09             | -0.32         | -0.33      | -0.28          | -0.26       | 1.16             | 0.62          | -0.12             | -0.04     | -0.33          | -0.05        | 16.6    | 114.19   | 1.03  | -0.2      | -0.09     | 18.34        | 15.72          |
|             | Run2_MDS27  | 1.14       | 0.44         | 0.46  | 0.34  | 0.73    | 0.4               | -0.18        | -0.24             | -0.2             | -0.12         | -0.23      | -0.22          | -0.2        | 1.46             | 3.8           | -0.07             | 11.55     | -0.24          | -0.06        | 25.25   | 107.87   | -0.04 | -0.15     | 1.39      | 29.61        | 21.02          |
|             | Run2_MDS2   | -0.01      | -0.18        | -0.04 | -0.22 | -0.16   | -0.2              | -0.23        | -0.25             | -0.09            | -0.18         | -0.34      | -0.22          | -0.19       | 1.54             | 2.17          | 0.42              | 1.08      | 0.1            | -0.02        | 23.14   | 69.58    | -0.02 | -0.28     | 0.1       | 36.81        | 22.41          |
|             | Run2_MDS3   | 0.37       | 0.26         | 0.4   | 0.16  | 0.43    | 0.12              | -0.26        | -0.14             | -0.15            | -0.17         | -0.06      | -0.03          | 0.03        | 1.43             | 0.74          | -0.04             | -0.23     | -0.25          | 0.03         | 22.24   | 140.38   | 1.98  | -0.19     | 0.48      | 32.15        | 18.43          |
| Lower Risk  | Run1_MDS23  | -0.02      | 0.15         | 0.18  | 0.06  | 0.47    | -0.05             | -0.07        | -0.07             | -0.09            | -0.08         | -0.15      | -0.12          | -0.12       | 1.55             | 2.14          | 0.54              | 0.26      | -0.19          | -0.24        | 12.49   | 91.5     | 0.35  | -0.26     | 0.81      | 15.27        | 11.42          |
|             | Run1_MDS25  | -0.11      | 1.66         | 1.34  | 1.77  | 0.89    | -0.1              | -0.21        | -0.22             | -0.21            | -0.17         | -0.23      | -0.24          | -0.21       | 2.86             | 3.28          | 0.78              | 0.85      | -0.22          | -0.13        | 25.32   | 74.65    | 1.76  | -0.23     | 0.67      | 24.04        | 26.59          |
|             | Run1_MDS5   | 0.37       | 1.1          | 0.77  | 0.23  | 0.46    | 0.46              | 0.11         | 0.29              | 0.1              | 0.26          | -0.11      | 0.02           | 0           | 1.4              | 4.97          | 1.19              | 1.13      | -0.18          | 0.09         | 32.32   | 88.11    | 0.42  | -0.13     | 0.59      | 34.64        | 30.94          |
|             | Run1_MDS6   | 0.01       | 0.62         | 0.34  | -0.13 | 0.89    | 0.25              | -0.09        | -0.14             | -0.11            | -0.13         | -0.18      | -0.15          | -0.19       | 5.12             | 5.48          | 0.77              | 0.49      | -0.26          | 0.28         | 26.56   | 170.82   | 0.59  | -0.13     | 2.48      | 35.01        | 22.04          |
|             | Run1_MDS8   | 0.03       | 0.64         | 0.14  | 0.45  | 0.66    | 0.3               | 0.09         | -0.05             | -0.12            | -0.15         | -0.26      | -0.23          | -0.21       | 6.15             | 4.45          | 0.72              | 9.44      | -0.26          | 1.28         | 27.76   | 149      | 1.41  | -0.03     | 1.15      | 26.82        | 28.12          |
|             | Run1_MDS9   | 0.5        | 0.52         | 0.54  | 0.3   | 0.85    | 0.37              | 0            | -0.11             | -0.07            | -0.14         | -0.16      | -0.13          | -0.13       | 4.39             | 6.12          | 1.41              | 15.63     | -0.23          | 0.26         | 19.84   | 140.33   | 0.44  | -0.03     | 0.51      | 21.56        | 18.9           |
|             | Run2_MDS12  | -0.12      | 0.56         | 1.23  | 0.28  | 0.41    | -0.08             | -0.18        | -0.16             | -0.16            | -0.23         | -0.22      | -0.17          | -0.16       | 1.79             | 1.62          | -0.06             | -0.04     | -0.23          | -0.2         | 13.16   | 108.41   | 0.02  | -0.26     | 0.35      | 14.74        | 12.26          |
|             | Run2_MDS14  | -0.1       | -0.11        | -0.56 | -0.18 | 0.43    | -0.19             | -0.18        | -0.15             | -0.22            | -0.15         | -0.22      | -0.18          | -0.2        | 2.51             | 4.59          | -0.01             | -0.27     | -0.27          | -0.18        | 13.76   | 152.83   | 0     | -0.15     | 1.78      | 17.88        | 12.22          |
|             | Run2_MDS19  | -0.13      | 0.32         | -0.05 | 0.35  | 0.36    | -0.07             | -0.22        | -0.24             | -0.24            | -0.19         | -0.21      | -0.2           | -0.21       | 1.24             | 0.87          | -0.16             | 1.24      | -0.27          | -0.05        | 17.64   | 73.36    | 0.1   | -0.21     | 1.19      | 18.05        | 17.53          |
|             | Run2_MDS20  | 0.48       | 0.26         | 0.14  | 0.06  | 0.91    | -0.03             | -0.11        | -0.18             | -0.16            | -0.18         | -0.19      | -0.14          | -0.16       | 3.07             | 2.36          | 0.39              | 8.22      | -0.12          | 1.29         | 18.45   | 79.52    | 0.08  | -0.22     | 0.65      | 16.79        | 18.63          |
| Run2_MDS28* | 0.05        | 0.02       | -0.18        | -0.04 | 0.32  | 0.11    | -0.05             | -0.09        | -0.04             | -0.09            | -0.11         | -0.02      | -0.05          | 2.32        | 1.02             | 0.23          | 0.75              | -0.27     | -0.29          | 18.88        | 112.25  | 0.17     | -0.19 | 1.01      | 18.19     | 19.46        |                |
| Run2_MDS5   | 0.12        | 0.65       | -0.05        | 0.28  | 0.88  | 0.11    | -0.16             | 0.12         | -0.06             | -0.05            | -0.18         | -0.11      | -0.08          | 0.74        | 3.03             | 0.75          | 1.3               | -0.26     | 0.33           | 30.62        | 96.77   | 0        | -0.08 | 0.74      | 36.12     | 28.78        |                |
| ICUS        | Run1_ICUS18 | 0.14       | 0.75         | 0.29  | 0.41  | 0.67    | -0.06             | -0.08        | -0.19             | -0.23            | -0.09         | -0.15      | -0.13          | -0.15       | 2.21             | 1.84          | 0.18              | 10.59     | -0.29          | 0.09         | 24.1    | 129.79   | 0.54  | -0.23     | 0.99      | 25.12        | 23.91          |
|             | Run1_ICUS22 | -0.06      | 0.46         | 0.54  | 0.62  | 0.45    | 0.08              | -0.06        | -0.11             | -0.14            | -0.12         | -0.16      | -0.16          | -0.19       | 2.66             | 3.09          | 0.35              | 0.04      | -0.24          | 0.03         | 14.1    | 87.72    | 0.26  | -0.19     | 0.77      | 13.45        | 14.36          |
|             | Run1_ICUS24 | 0.02       | 0.37         | 0.33  | 0.16  | 0.58    | -0.02             | -0.14        | -0.22             | -0.23            | -0.11         | -0.16      | -0.15          | -0.18       | 3.32             | 2.89          | 1.28              | -0.14     | -0.25          | -0.21        | 10.16   | 85.87    | 0.51  | -0.26     | 2.14      | 14.02        | 7.17           |
| Normal      | Run1_NI-1   | -0.04      | 0.14         | 0.11  | 0.06  | 0.22    | -0.1              | -0.14        | -0.13             | -0.2             | -0.07         | -0.19      | -0.19          | -0.19       | 2.39             | 2.86          | 0.59              | -0.22     | -0.31          | -0.08        | 20.68   | 154.96   | 0.63  | -0.09     | 3.14      | 21.73        | 20.13          |
|             | Run1_NI-3   | 0.13       | 0.56         | 0.46  | 0.23  | 0.37    | 0.06              | -0.02        | 0.11              | -0.09            | -0.07         | -0.14      | -0.08          | -0.08       | 3.16             | 1.86          | 0.29              | 0.01      | -0.34          | -0.16        | 19.71   | 125.46   | 0.17  | -0.17     | 0.08      | 21.87        | 18.27          |
|             | Run1_NI-4   | 0.14       | 0.53         | 0.78  | 0.45  | 0.74    | 0.15              | 0.17         | 0.13              | -0.08            | -0.04         | -0.1       | -0.06          | -0.07       | 3.46             | 2.05          | 0.26              | -0.01     | -0.29          | 0.31         | 22.33   | 158.7    | 0.57  | -0.24     | 0.19      | 25           | 20.26          |
|             | Run1_NI-6   | -0.01      | 0.35         | 0.21  | 0.2   | 0.42    | 0.1               | 0.1          | 0.15              | -0.02            | -0.08         | -0.14      | -0.12          | -0.15       | 2.68             | 2.14          | 0.21              | -0.21     | -0.3           | -0.07        | 18.7    | 143.11   | 0.22  | -0.21     | 0         | 22.27        | 17.64          |
|             | Run2_NI-3   | -0.02      | 0.32         | 0.35  | 0.24  | 0.32    | 0                 | -0.07        | -0.02             | -0.12            | -0.12         | -0.18      | -0.11          | -0.1        | 2.06             | 1.2           | 0.03              | -0.05     | -0.32          | -0.13        | 16.67   | 110.97   | 0.04  | -0.23     | 0.13      | 18.99        | 15.19          |
|             | Run2_NI-4   | 0.03       | 0.53         | 0.48  | 0.49  | 0.55    | 0.08              | -0.02        | 0.05              | -0.07            | -0.09         | -0.15      | -0.07          | -0.07       | 1.95             | 1.34          | 0.09              | -0.09     | -0.29          | -0.15        | 19.58   | 140.9    | 0.29  | -0.25     | 0.31      | 22.11        | 17.24          |
| Run2_NI-5   | 0.11        | 0.39       | 0.44         | 0.3   | 0.57  | -0.04   | 0.02              | 0.05         | -0.07             | -0.12            | -0.17         | -0.11      | -0.1           | 2.52        | 2.09             | 0.05          | -0.21             | -0.33     | -0.14          | 20.48        | 162.96  | 0.26     | -0.24 | 0.08      | 23.19     | 18.45        |                |
| Run2_NI-6   | -0.12       | 0.19       | 0.15         | 0.13  | 0.27  | 0.04    | -0.05             | 0.01         | -0.07             | -0.18            | -0.2          | -0.16      | -0.16          | 1.11        | 1.07             | -0.09         | -0.2              | -0.3      | -0.06          | 15.46        | 130.32  | -0.07    | -0.25 | 0.59      | 17.89     | 14.61        |                |

Supplemental Table 3: Median expression of each surface marker on each cell population.

|             |             | CD71 Median |              |       |       |         |                   |              |                   |                  |               |            |                |             |                  |               |                   |           |               |              |         |          |       |           |           |              |                |  |
|-------------|-------------|-------------|--------------|-------|-------|---------|-------------------|--------------|-------------------|------------------|---------------|------------|----------------|-------------|------------------|---------------|-------------------|-----------|---------------|--------------|---------|----------|-------|-----------|-----------|--------------|----------------|--|
|             |             | Ungated     | CD34-CD38low | HSCs  | MPP   | CMP/GMP | Myelo/Mono-Blasts | ProMonocytes | CD14neg Monocytes | Mature Monocytes | ProMyelocytes | Myelocytes | MetaMyelocytes | MatureGrans | ProErythroblasts | Erythroblasts | LateErythroblasts | PreBCells | Mature Bcells | Plasma Cells | T cells | NK cells | pDCs  | Basophils | Platelets | CD8+ T cells | CD8neg T cells |  |
| AML/RAEB-T  | Run1_MDS17  | 3.32        | 10.51        | 10.78 | 10.08 | 19.57   | 10.6              | 3.73         | 1.4               | 1.7              | 4.09          | 1.88       | 0.54           | 0.7         | 196.03           | 201.9         | 44.74             | 2.76      | 1.7           | 9.34         | 1.21    | 1.96     | 4.75  | 2.7       | 3.47      | 1.07         | 1.44           |  |
|             | Run2_MDS15* | 0.91        | 8.34         | 4.91  | 4.58  | 6.29    | 6.6               | 2.66         | 0.16              | 0.11             | 3.74          | 0.9        | 0.1            | -0.11       | 108.2            | 221.06        | 3.03              | 0.23      | 1.93          | 45.19        | 1.46    | 3.16     | 4.08  | 0.77      | 3.64      | 1.7          | 1.17           |  |
|             | Run2_MDS4   | 0.99        | 9.36         | 4.59  | 8.74  | 0.87    | 4.24              | 1.8          | 1.24              | 1.83             | 2.96          | 0.52       | -0.11          | -0.11       | 207.46           | 284.51        | 5                 | 1.48      | 3.4           | 2.07         | 0.93    | 3.58     | 7.3   | 1.24      | 5.19      | 1.05         | 0.79           |  |
| Higher Risk | Run1_MDS21  | 3.19        | 6.8          | 7.02  | 6.35  | 9.25    | 9.63              | 6.24         | 2.73              | 2.46             | 2.13          | 1.08       | 0.19           | 0.49        | 393.38           | 482.58        | 15.07             | 1.99      | 2.72          | 7.73         | 1.5     | 3.9      | 4.8   | 1.42      | 8.49      | 1.85         | 1.33           |  |
|             | Run1_MDS3   | 3.07        | 6.53         | 6.02  | 5.74  | 8.32    | 9.39              | 6.5          | 2.04              | 3.41             | 2.53          | 0.96       | 0.25           | 0.85        | 226.88           | 239.18        | 10.05             | 2.01      | 2.45          | 5.99         | 1.63    | 4.05     | 8.07  | 1.25      | 7.86      | 1.9          | 1.52           |  |
|             | Run2_MDS13  | 2.37        | 4.7          | 4.83  | 4.39  | 6.06    | 6.67              | 2.29         | 1.28              | 1.04             | 5.19          | 1.35       | -0.04          | -0.06       | 147.99           | 300.66        | 25.93             | 3.4       | 1.37          | 46.54        | 1.11    | 3.4      | 11.15 | 0.75      | 6.44      | 1.4          | 0.98           |  |
|             | Run2_MDS16  | 0.53        | 23.68        | 18.51 | 23.67 | 22.93   | 7.76              | 3.7          | 2.8               | 1.79             | 10.93         | 0.39       | -0.17          | -0.29       | 199.02           | 772.24        | 7.76              | 2.18      | 0.85          | 7.58         | 1.59    | 2.88     | 7.52  | 1.51      | 8.08      | 1.81         | 1.53           |  |
|             | Run2_MDS1   | 0.59        | 4.92         | 4.86  | 4.57  | 5.64    | 4.24              | 1.36         | 0.54              | 0.67             | 0.29          | -0.2       | -0.14          | -0.11       | 188.05           | 219.04        | 14.26             | 1.22      | 1.83          | 2.54         | 1.04    | 2.01     | 4.94  | 0.93      | 5.55      | 0.81         | 1.12           |  |
|             | Run2_MDS21  | 1.93        | 4.74         | 4.84  | 4.44  | 6.75    | 6.53              | 2.9          | 1.15              | 0.78             | 2.02          | 0.63       | -0.06          | -0.1        | 155.09           | 268.91        | 31.65             | 1.26      | 1.72          | 6.51         | 0.93    | 2.3      | 5.22  | 0.39      | 5.43      | 1.14         | 0.82           |  |
|             | Run2_MDS26* | 0.51        | 14.75        | 14.14 | 13.94 | 30.06   | 11.89             | 5.9          | 3.25              | 2.58             | 1.36          | 0.24       | -0.08          | -0.09       | 195.08           | 163.55        | 31.2              | 1.35      | 1.11          | 6.94         | 1.09    | 2.78     | 7.15  | 1.78      | 3.66      | 1.2          | 1.02           |  |
|             | Run2_MDS27  | 2.54        | 9.41         | 6.59  | 10.89 | 21.33   | 15.9              | 5.21         | 1.44              | 0.76             | 10.07         | 1.11       | -0.09          | -0.14       | 208.48           | 835.57        | 23.68             | 2.09      | 1.26          | 4.18         | 1.3     | 2.64     | 3.49  | 0.77      | 8.28      | 1.43         | 1.13           |  |
|             | Run2_MDS2   | 0.3         | 1.71         | 2.93  | 1.44  | 2.27    | 1.9               | 0.43         | -0.02             | 0.23             | 1.89          | -0.03      | -0.11          | -0.07       | 148.77           | 257.59        | 4.24              | 0.91      | 1.71          | 27.82        | 0.87    | 1.27     | 0.26  | 0         | 1.59      | 1.33         | 0.84           |  |
|             | Run2_MDS3   | 2.68        | 4.42         | 4.99  | 4.15  | 6.38    | 7.43              | 2.41         | 1.52              | 1.95             | 4.06          | 1.08       | 0.08           | 0.11        | 299.06           | 190.97        | 32.14             | 1.14      | 1.74          | 5.82         | 1.07    | 2.82     | 5.88  | 0.53      | 6.68      | 1.34         | 0.97           |  |
| Lower Risk  | Run1_MDS23  | 0.79        | 6.25         | 5.29  | 5.22  | 26.33   | 11.33             | 4.89         | 3.16              | 1.93             | 1.42          | 0.35       | 0.22           | 0.27        | 248.86           | 304.76        | 4.26              | 2.31      | 1.64          | 4.36         | 1.51    | 3.53     | 19.67 | 1.77      | 4.74      | 1.82         | 1.4            |  |
|             | Run1_MDS25  | 0.42        | 6.33         | 8.16  | 5.02  | 39.09   | 12.67             | 10.08        | 7.48              | 4.68             | 6.52          | 0.68       | 0.03           | 0.04        | 452.03           | 505.28        | 2.22              | 3.6       | 2.47          | 19.36        | 2.49    | 3.2      | 22.23 | 1.58      | 4.9       | 2.18         | 2.85           |  |
|             | Run1_MDS5   | 1.93        | 5.51         | 4.27  | 4.18  | 10.71   | 11.79             | 4.13         | 3.55              | 3.75             | 16.9          | 2.21       | 2.15           | 1.44        | 123.19           | 662.25        | 4.68              | 2.26      | 1.06          | 37.6         | 2.06    | 3.11     | 4.39  | 1.8       | 3.67      | 2.76         | 1.85           |  |
|             | Run1_MDS6   | 0.56        | 11.28        | 7.43  | 7.63  | 17.89   | 11.25             | 4.93         | 2.83              | 1.69             | 3.89          | 0.63       | 0.17           | 0.01        | 311.41           | 905.93        | 3.71              | 1.47      | 1.83          | 7.18         | 1.69    | 4.31     | 7.24  | 0.71      | 8.04      | 2.23         | 1.28           |  |
|             | Run1_MDS8   | 0.55        | 4.03         | 4.34  | 2.52  | 17.08   | 10.45             | 5.27         | 3.51              | 2.42             | 4.68          | 0.61       | 0.02           | 0.05        | 1054.61          | 811.08        | 7.17              | 1.68      | 1.21          | 5.16         | 1.28    | 4.02     | 10.34 | 4.2       | 6.23      | 1.59         | 1.19           |  |
|             | Run1_MDS9   | 1.06        | 26.5         | 24.36 | 27.67 | 37.3    | 23.11             | 6.87         | 4.22              | 2.66             | 2.49          | 0.59       | 0.31           | 0.34        | 740.39           | 1033.66       | 6.27              | 3.06      | 2.1           | 7.1          | 1.57    | 4.31     | 6.33  | 2.31      | 4.76      | 1.65         | 1.54           |  |
|             | Run2_MDS12  | 0.41        | 22.63        | 17.89 | 20.41 | 26.06   | 8.28              | 4.12         | 2.66              | 1.79             | 2.05          | 0.47       | -0.03          | -0.03       | 351.76           | 410.44        | 14.45             | 1.86      | 1.13          | 2.98         | 0.8     | 2.96     | 28.47 | 1.24      | 4.97      | 1.04         | 0.65           |  |
|             | Run2_MDS14  | 0.69        | 3.58         | 0.89  | 2.4   | 17.69   | 5.8               | 5.17         | 4.38              | 2.77             | 6.22          | 0.53       | -0.08          | -0.17       | 501.01           | 1898.68       | 0.77              | 1.16      | 0.96          | 5.63         | 1.17    | 3.35     | 14.18 | 0.68      | 9.97      | 1.32         | 1.65           |  |
|             | Run2_MDS19  | 0.18        | 8.01         | 5.79  | 7.16  | 21.81   | 8.77              | 3.18         | 1.74              | 0.9              | 2.46          | 0.16       | -0.13          | -0.16       | 224.87           | 256.37        | 14.08             | 1.51      | 1.48          | 1.8          | 1.21    | 2.27     | 13.58 | 0.86      | 5.1       | 1.18         | 1.22           |  |
|             | Run2_MDS20  | 0.35        | 1.47         | 4.98  | 1.01  | 27.8    | 4.23              | 2.7          | 0.96              | 0.6              | 2.64          | 0.38       | -0.08          | -0.11       | 499              | 413.63        | 1.36              | 1         | 2.47          | 10.01        | 0.85    | 2.59     | 5.07  | 0.8       | 4.85      | 1.2          | 0.82           |  |
| Run2_MDS28* | 0.45        | 8.15        | 4.7          | 8.96  | 15.97 | 5.44    | 2.82              | 1.52         | 1.67              | 1.63             | 0.43          | 0.22       | 0.12           | 307.54      | 220.85           | 1.8           | 1.29              | 1.47      | 0.91          | 0.94         | 2.67    | 5.37     | 1.26  | 10.5      | 0.96      | 0.92         |                |  |
| Run2_MDS5   | 1.11        | 4.14        | 2.38         | 4.52  | 8.01  | 10.49   | 2.35              | 2.44         | 2.15              | 11.13            | 1             | 1.15       | 0.81           | 135.48      | 535.92           | 3.14          | 2.07              | 0.56      | 33.87         | 1.61         | 2.7     | 6.69     | 1.17  | 4.1       | 2.32      | 1.35         |                |  |
| ICUS        | Run1_ICUS18 | 0.54        | 6.8          | 5.8   | 4.71  | 18.62   | 8.3               | 4.82         | 2.51              | 1.48             | 4.27          | 0.93       | 0.26           | 0.14        | 317.53           | 302.12        | 0.76              | 2.41      | 1.8           | 2.67         | 1.66    | 3.58     | 18.57 | 0.79      | 4.78      | 1.74         | 1.64           |  |
|             | Run1_ICUS22 | 0.61        | 17.17        | 12.54 | 18.98 | 29.37   | 13.01             | 8.21         | 5.21              | 2.96             | 3.35          | 1          | 0.25           | 0.15        | 405.22           | 499.64        | 1.3               | 2.08      | 2.04          | 5.5          | 1.61    | 3.57     | 12.21 | 1.04      | 6.16      | 1.42         | 1.68           |  |
|             | Run1_ICUS24 | 0.72        | 14.56        | 9.45  | 17.64 | 29.84   | 13.34             | 8.32         | 5.03              | 2.79             | 3.8           | 0.78       | 0.18           | 0.12        | 544.75           | 530.06        | 9.3               | 1.45      | 1.64          | 7.06         | 1.14    | 3.15     | 14.91 | 1.58      | 10.5      | 1.13         | 1.15           |  |
| Normal      | Run1_NI-1   | 0.69        | 12.21        | 9.82  | 11.92 | 15.1    | 13.67             | 12.28        | 10.39             | 5.65             | 8.27          | 1.21       | 0.25           | 0.11        | 374.34           | 495.25        | 2.18              | 1.61      | 1.4           | 5.6          | 1.82    | 4.17     | 23.68 | 2.22      | 14.6      | 1.7          | 1.88           |  |
|             | Run1_NI-3   | 0.71        | 12.62        | 10.77 | 10.37 | 22.1    | 11.56             | 5.31         | 4.12              | 2.05             | 7.16          | 0.7        | 0.24           | 0.14        | 475.28           | 301.68        | 0.9               | 1.32      | 0.9           | 3.79         | 1.26    | 3.76     | 10.76 | 1.51      | 2.88      | 1.44         | 1.15           |  |
|             | Run1_NI-4   | 0.73        | 11.82        | 14.24 | 10.55 | 29.93   | 13.26             | 4.84         | 2.81              | 1.39             | 7.05          | 0.87       | 0.26           | 0.16        | 530.22           | 334.24        | 0.78              | 1.34      | 1.44          | 5.12         | 1.33    | 4.13     | 13.26 | 1.05      | 3.01      | 1.5          | 1.19           |  |
|             | Run1_NI-6   | 0.8         | 7.09         | 6.57  | 7.07  | 19.67   | 13.36             | 6.14         | 3.64              | 2.12             | 6.03          | 0.83       | 0.19           | 0.1         | 443.19           | 359           | 1.95              | 1.4       | 1.35          | 6.08         | 1.42    | 3.9      | 9.43  | 1.58      | 3.18      | 1.53         | 1.36           |  |
|             | Run2_NI-3   | 0.19        | 10.29        | 9.79  | 10.29 | 20.65   | 8.74              | 3.26         | 2.01              | 1.24             | 4.69          | 0.02       | -0.13          | -0.15       | 369.95           | 260.19        | 0.18              | 0.83      | 0.62          | 2.44         | 0.83    | 2.82     | 8.27  | 0.88      | 2.97      | 0.95         | 0.76           |  |
|             | Run2_NI-4   | 0.22        | 12.2         | 11.99 | 10.96 | 27.66   | 9.81              | 2.59         | 1.27              | 0.86             | 5             | 0.17       | -0.1           | -0.13       | 331.43           | 288.7         | 0.2               | 0.82      | 1.01          | 4.05         | 0.88    | 3.14     | 10.83 | 0.67      | 3.17      | 1            | 0.77           |  |
| Run2_NI-5   | 0.5         | 17.38       | 15.12        | 18.43 | 24.09 | 13.05   | 5.71              | 2.39         | 1.45              | 7.81             | 0.18          | -0.12      | -0.17          | 372.8       | 449.97           | 0.5           | 0.73              | 0.71      | 4.24          | 1.06         | 3.46    | 10.82    | 0.97  | 2.23      | 1.18      | 0.96         |                |  |
| Run2_NI-6   | 0.19        | 5.13        | 4.32         | 4.84  | 17.14 | 10.18   | 3.79              | 2.17         | 1.42              | 3.87             | 0.29          | -0.13      | -0.18          | 203.31      | 245.29           | 2.46          | 0.87              | 0.93      | 5.27          | 0.88         | 3.05    | 7.82     | 0.66  | 3.85      | 0.97      | 0.85         |                |  |

Supplemental Table 3: Median expression of each surface marker on each cell population.

|             |             | CD235 Median |              |      |      |         |                   |              |                   |                  |               |            |                |             |                  |               |                   |           |               |              |         |          |      |           |           |              |                |
|-------------|-------------|--------------|--------------|------|------|---------|-------------------|--------------|-------------------|------------------|---------------|------------|----------------|-------------|------------------|---------------|-------------------|-----------|---------------|--------------|---------|----------|------|-----------|-----------|--------------|----------------|
|             |             | Ungated      | CD34-CD38low | HSCs | MPP  | CMP/GMP | Myelo/Mono-Blasts | ProMonocytes | CD14neg Monocytes | Mature Monocytes | ProMyelocytes | Myelocytes | MetaMyelocytes | MatureGrans | ProTryptroblasts | Erythroblasts | LateErythroblasts | PreBCells | Mature Bcells | Plasma Cells | T cells | NK cells | pDCs | Basophils | Platelets | CD8+ T cells | CD8neg T cells |
| AML/RAEB-T  | Run1_MDS17  | 2.59         | 1.67         | 1.68 | 1.54 | 2.73    | 1.58              | 2.13         | 2.52              | 2.2              | 1.99          | 3.2        | 3.25           | 3.81        | 11.23            | 40.51         | 26.47             | 1.93      | 0.84          | 1.92         | 1.24    | 1.31     | 1.96 | 2.89      | 3.92      | 1.39         | 1.04           |
|             | Run2_MDS15* | 1.73         | 2.51         | 1.97 | 1.81 | 1.89    | 1.81              | 1.49         | 1.68              | 1.76             | 1.93          | 1.76       | 1.93           | 1.95        | 5.46             | 83.03         | 27.28             | 1.51      | 0.97          | 3.55         | 1.38    | 1.68     | 2.04 | 1.44      | 2.49      | 1.63         | 1.16           |
|             | Run2_MDS4   | 1.54         | 1.81         | 1.55 | 1.44 | 0.26    | 0.99              | 1.11         | 1.39              | 1.7              | 1.24          | 1.44       | 1.63           | 10.1        | 6.32             | 73.16         | 44.94             | 0.91      | 0.91          | 1.89         | 0.97    | 1.3      | 1.07 | 1.11      | 24.82     | 1.23         | 0.76           |
| Higher Risk | Run1_MDS21  | 2.05         | 1.31         | 1.67 | 1.15 | 1.49    | 1.46              | 1.47         | 1.65              | 1.27             | 1.31          | 2.13       | 2.47           | 3.33        | 9.07             | 26.46         | 22.12             | 0.65      | 0.95          | 2.65         | 1.11    | 2.17     | 2.03 | 1.46      | 6.6       | 1.38         | 1              |
|             | Run1_MDS3   | 2.23         | 1.31         | 1.28 | 1.09 | 1.49    | 1.6               | 1.44         | 1.92              | 2.71             | 1.66          | 2.34       | 2.83           | 3.83        | 8.67             | 26.5          | 23.74             | 0.79      | 1.02          | 2.49         | 1.36    | 2.05     | 3.76 | 1.01      | 5.49      | 1.69         | 1.23           |
|             | Run2_MDS13  | 1.52         | 1.09         | 1.18 | 0.96 | 1.22    | 1.23              | 1.54         | 2.38              | 2.62             | 1.49          | 2.03       | 2.38           | 2.45        | 6.32             | 73.16         | 28.07             | 0.52      | 0.65          | 2.84         | 0.94    | 1.34     | 0.97 | 1.07      | 3.24      | 1.21         | 0.82           |
|             | Run2_MDS16  | 2.54         | 2.49         | 2.35 | 2.21 | 1.98    | 1.85              | 1.33         | 1.39              | 1.56             | 2.19          | 1.87       | 2.71           | 3.1         | 5.4              | 212.13        | 33.39             | 1.34      | 0.46          | 1.49         | 1.1     | 1.41     | 1.76 | 0.99      | 5.54      | 1.54         | 1.01           |
|             | Run2_MDS1   | 0.86         | 0.99         | 0.96 | 0.77 | 1.2     | 0.78              | 0.7          | 0.6               | 0.97             | 0.5           | 0.36       | 1.13           | 1.39        | 5.02             | 64.29         | 45.34             | 0.83      | 0.9           | 1.89         | 0.8     | 1.02     | 0.87 | 1.08      | 7.09      | 0.88         | 0.79           |
|             | Run2_MDS21  | 1.57         | 0.86         | 1.09 | 0.78 | 1.09    | 1                 | 0.79         | 1.31              | 1.56             | 1.37          | 1.9        | 2.1            | 2.32        | 9.43             | 54.3          | 28.25             | 0.45      | 0.59          | 2.25         | 0.77    | 0.88     | 0.35 | 1.05      | 4.97      | 1            | 0.67           |
|             | Run2_MDS26* | 1.1          | 1.63         | 1.72 | 1.51 | 2.12    | 1.15              | 1.09         | 1.25              | 1.19             | 0.53          | 0.54       | 0.88           | 1.05        | 6.41             | 85.85         | 43.03             | 0.92      | 0.23          | 0.78         | 0.76    | 1.13     | 1.36 | 0.89      | 0.93      | 0.98         | 0.63           |
|             | Run2_MDS27  | 3.46         | 2.16         | 2.12 | 2.03 | 2.24    | 2.06              | 1.32         | 1                 | 1.11             | 2.62          | 2.61       | 3.51           | 4.38        | 5.31             | 327.88        | 58.35             | 1.46      | 0.7           | 2.22         | 1.27    | 1.11     | 1.8  | 1.15      | 4.38      | 1.49         | 1.02           |
|             | Run2_MDS2   | 0.78         | 0.51         | 0.83 | 0.29 | 0.64    | 0.41              | 0.18         | 0.45              | 0.78             | 0.77          | 0.72       | 0.98           | 1.21        | 8.66             | 88.58         | 38.25             | 0.67      | 0.76          | 0.35         | 0.64    | 0.59     | 0.65 | 0.35      | 3.53      | 0.98         | 0.61           |
|             | Run2_MDS3   | 2.16         | 1.05         | 1.27 | 0.96 | 1.3     | 1.27              | 1.36         | 2.15              | 2.33             | 1.99          | 3.04       | 3.32           | 4.14        | 6.95             | 74.86         | 35.21             | 0.42      | 0.81          | 1.26         | 1       | 1.25     | 1.68 | 1.04      | 5.47      | 1.26         | 0.89           |
| Lower Risk  | Run1_MDS23  | 2.29         | 1.53         | 1.58 | 1.06 | 2.74    | 2.06              | 1.94         | 1.89              | 1.72             | 2.26          | 2.15       | 2.43           | 2.65        | 8.85             | 26.47         | 25.45             | 1.5       | 0.72          | 2.04         | 1.31    | 1.6      | 2.09 | 1.11      | 9.32      | 1.73         | 1.16           |
|             | Run1_MDS25  | 2.54         | 5.51         | 2.96 | 3.87 | 2.95    | 1.86              | 1.7          | 1.39              | 1.23             | 2.5           | 2.06       | 2.32           | 2.72        | 11.89            | 34.79         | 22.18             | 1.62      | 1.21          | 2.92         | 1.65    | 1.83     | 2.51 | 1.33      | 4.39      | 1.99         | 1.29           |
|             | Run1_MDS5   | 3.66         | 4.14         | 0.42 | 2.91 | 1.94    | 2.52              | 2.8          | 3.35              | 2.74             | 3.55          | 2.72       | 3.36           | 3.66        | 7.47             | 183.02        | 62.63             | 3.15      | 0.99          | 3.94         | 1.72    | 2.2      | 2.18 | 2.15      | 26.26     | 2.16         | 1.52           |
|             | Run1_MDS6   | 3.63         | 2.28         | 1.7  | 3.31 | 1.93    | 2.31              | 1.94         | 1.95              | 1.96             | 2.66          | 2.8        | 3.61           | 4.02        | 9.16             | 133.76        | 22.16             | 3.35      | 0.91          | 3.24         | 1.64    | 2.26     | 2.35 | 1.51      | 11.69     | 2.15         | 1.22           |
|             | Run1_MDS8   | 2.77         | 3.83         | 2.9  | 3.05 | 2.51    | 2                 | 2.08         | 1.85              | 1.68             | 2.34          | 2.16       | 2.64           | 3.01        | 11.4             | 52.56         | 30.16             | 1.43      | 0.72          | 5.78         | 1.01    | 1.85     | 2.96 | 1.89      | 7.1       | 1.32         | 0.92           |
|             | Run1_MDS9   | 2.83         | 2.71         | 2.68 | 2.4  | 3.35    | 2.58              | 2.1          | 1.85              | 2                | 2.62          | 2.49       | 2.84           | 3.42        | 10.3             | 33.5          | 23.03             | 1.61      | 0.83          | 3.06         | 1.27    | 2.04     | 1.64 | 1.96      | 7.02      | 1.63         | 1.07           |
|             | Run2_MDS12  | 2.08         | 2.42         | 2.48 | 1.66 | 2.66    | 1.76              | 1.63         | 1.76              | 1.67             | 1.96          | 1.41       | 2.14           | 2.31        | 10.42            | 75.7          | 31.15             | 1.12      | 0.66          | 1.22         | 0.75    | 1.32     | 2.18 | 0.94      | 5.04      | 1.02         | 0.58           |
|             | Run2_MDS14  | 3.54         | 3.32         | 1.84 | 5.52 | 0.78    | 1.26              | 1.55         | 1.58              | 1.56             | 2.72          | 2.56       | 3.43           | 3.93        | 9.51             | 104.83        | 21.57             | 0.73      | 0.67          | 1.52         | 1.08    | 1.55     | 1.22 | 1.36      | 11.35     | 1.36         | 0.92           |
|             | Run2_MDS19  | 2.96         | 2.03         | 2    | 1.87 | 2.48    | 1.79              | 1.2          | 1.08              | 1.07             | 2.07          | 2.65       | 3.25           | 3.47        | 7.65             | 97.24         | 32.18             | 1.1       | 0.64          | 1.94         | 1.14    | 1.19     | 1.92 | 0.83      | 8.95      | 1.42         | 1.06           |
|             | Run2_MDS20  | 2.6          | 3.17         | 1.51 | 2.11 | 2.1     | 1.54              | 1.59         | 1.35              | 1.44             | 2.5           | 2.93       | 3.38           | 4.09        | 7.77             | 144.42        | 21.3              | 1.32      | 1.14          | 3.63         | 0.87    | 0.98     | 1.81 | 1.27      | 4.41      | 1.34         | 0.83           |
| Run2_MDS28* | 2.62        | 1.4          | 1.17         | 0.87 | 1.99 | 1.83    | 1.55              | 1.64         | 1.64              | 1.98             | 2.07          | 2.96       | 3.18           | 6.06        | 88.52            | 21.58         | 1.37              | 0.55      | 1.51          | 0.95         | 1.27    | 2.02     | 1.18 | 6.37      | 1.1       | 0.83         |                |
| Run2_MDS5   | 3.39        | 2.63         | 0.71         | 1.77 | 2.31 | 2.55    | 2.58              | 2.97         | 2.13              | 2.7              | 2.72          | 3.45       | 3.67           | 5.69        | 249.27           | 64            | 2.44              | 0.61      | 2.88          | 1.34         | 1.66    | 2.65     | 1.73 | 59.58     | 1.67      | 1.17         |                |
| ICUS        | Run1_ICUS18 | 3.98         | 2.53         | 2.05 | 1.29 | 2.82    | 1.94              | 1.86         | 1.5               | 1.45             | 3.4           | 3.5        | 4.19           | 4.77        | 11.4             | 42            | 19.31             | 1.86      | 0.85          | 2.07         | 1.46    | 1.88     | 2.66 | 1.02      | 5.31      | 1.93         | 1.35           |
|             | Run1_ICUS22 | 2.78         | 2.66         | 2.44 | 2.64 | 2.73    | 2.16              | 1.83         | 1.54              | 1.41             | 2.56          | 2.66       | 3.02           | 3.17        | 9.75             | 29.29         | 19.77             | 1.03      | 0.79          | 1.34         | 1.41    | 1.83     | 2.35 | 1.29      | 5.66      | 1.72         | 1.29           |
|             | Run1_ICUS24 | 2.88         | 2.88         | 2.29 | 2.72 | 2.79    | 1.97              | 1.54         | 1.51              | 1.45             | 2.86          | 2.72       | 3.12           | 3.46        | 10.93            | 41.1          | 24.5              | 0.89      | 0.8           | 2.28         | 1.24    | 1.63     | 2.47 | 1.09      | 11.59     | 1.36         | 1.15           |
| Normal      | Run1_NI-1   | 3.29         | 2.46         | 3.46 | 1.22 | 2.32    | 1.87              | 2.11         | 1.82              | 1.74             | 3.45          | 2.99       | 3.53           | 3.85        | 10.7             | 31.76         | 19.94             | 0.81      | 0.71          | 1.36         | 1.43    | 1.91     | 2.71 | 1.66      | 12.37     | 1.77         | 1.25           |
|             | Run1_NI-3   | 5.1          | 3.01         | 2.88 | 2.3  | 2.59    | 2.56              | 3.08         | 3.94              | 2.75             | 4.06          | 4.32       | 5.83           | 6.4         | 9.53             | 65.41         | 19.68             | 1.04      | 0.58          | 2.34         | 1.29    | 1.86     | 2.25 | 1.54      | 4.35      | 1.56         | 1.11           |
|             | Run1_NI-4   | 5.94         | 3.47         | 2.97 | 3.17 | 2.9     | 2.76              | 3.65         | 4.14              | 3.1              | 4.62          | 5.17       | 6.55           | 6.83        | 9.62             | 65.54         | 19.7              | 1.14      | 0.8           | 2.89         | 1.29    | 1.89     | 2.5  | 1.51      | 3.08      | 1.53         | 1.1            |
|             | Run1_NI-6   | 4.44         | 2.17         | 1.87 | 1.99 | 2.72    | 2.54              | 3.22         | 3.7               | 2.97             | 3.52          | 3.83       | 4.69           | 4.81        | 11.13            | 55.79         | 20.08             | 0.94      | 0.65          | 2.79         | 1.22    | 1.84     | 2.08 | 1.43      | 2.64      | 1.6          | 1.12           |
|             | Run2_NI-3   | 4.72         | 2.17         | 1.9  | 2.06 | 2.28    | 2.25              | 2.78         | 3.49              | 2.45             | 3.62          | 4.01       | 5.76           | 6.59        | 7.96             | 85.65         | 20.12             | 0.86      | 0.34          | 1.59         | 0.89    | 1.24     | 1.69 | 0.96      | 5.03      | 1.1          | 0.75           |
|             | Run2_NI-4   | 5.83         | 2.62         | 2.33 | 2.91 | 2.57    | 2.46              | 3.39         | 3.78              | 2.96             | 4.28          | 4.94       | 6.74           | 7.17        | 7.81             | 82.75         | 20.15             | 0.76      | 0.55          | 2.38         | 0.94    | 1.2      | 1.79 | 0.77      | 3.89      | 1.14         | 0.81           |
| Run2_NI-5   | 4.94        | 2.95         | 1.77         | 2.56 | 2.33 | 2.47    | 3.41              | 4.15         | 3.17              | 3.69             | 4.32          | 5.83       | 6.54           | 7.52        | 120.65           | 20.5          | 0.7               | 0.37      | 2.28          | 0.95         | 1.25    | 1.82     | 0.97 | 3.06      | 1.19      | 0.75         |                |
| Run2_NI-6   | 3.91        | 1.8          | 1.31         | 1.7  | 2.13 | 2.13    | 2.86              | 3.12         | 2.62              | 2.86             | 3.34          | 4.28       | 4.7            | 8.23        | 66.45            | 21.66         | 0.69              | 0.44      | 2.11          | 0.86         | 1.3     | 1.47     | 0.89 | 3.79      | 1.02      | 0.81         |                |

Supplemental Table 3: Median expression of each surface marker on each cell population.

|             |             | CD47 Median |              |       |       |         |                   |              |                   |                  |               |            |                |             |                  |               |                   |           |               |              |         |          |        |           |           |              |                |
|-------------|-------------|-------------|--------------|-------|-------|---------|-------------------|--------------|-------------------|------------------|---------------|------------|----------------|-------------|------------------|---------------|-------------------|-----------|---------------|--------------|---------|----------|--------|-----------|-----------|--------------|----------------|
|             |             | Ungated     | CD34-CD38low | HSCs  | MPP   | CMP/GMP | Myelo/Mono-Blasts | ProMonocytes | CD14neg Monocytes | Mature Monocytes | ProMyelocytes | Myelocytes | MetaMyelocytes | MatureGrans | ProTryptroblasts | Erythroblasts | LateErythroblasts | PreBCells | Mature Bcells | Plasma Cells | T cells | NK cells | pDCs   | Basophils | Platelets | CD8+ T cells | CD8neg T cells |
| AML/BAE-B   | Run1_MDS17  | 51.05       | 34.69        | 34.28 | 32.92 | 67.75   | 30.82             | 43.89        | 61                | 56.4             | 66.53         | 67.36      | 91.89          | 109.16      | 20.84            | 21.03         | 23.19             | 45.56     | 31.6          | 65.03        | 35.55   | 35.98    | 40.68  | 63.69     | 77.44     | 28.48        | 49.12          |
|             | Run1_MDS15* | 39.61       | 51.32        | 39.88 | 39.37 | 45.55   | 49.19             | 38.64        | 32.5              | 26.59            | 50.12         | 40.03      | 45.37          | 48.48       | 90.44            | 43.02         | 55.21             | 30.14     | 38.79         | 48.67        | 60.17   | 53.36    | 48.69  | 68.76     | 80.62     | 42.91        | 78.23          |
|             | Run2_MDS4   | 35.94       | 32.46        | 32.69 | 31.84 | 69.66   | 25.65             | 30.5         | 35.79             | 36.82            | 45.09         | 42.03      | 45.87          | 43.02       | 16.1             | 16.56         | 13.38             | 35.27     | 31.7          | 30.68        | 37.94   | 33.08    | 25.23  | 73.16     | 179.71    | 33.38        | 43.15          |
| Higher Risk | Run1_MDS21  | 41.1        | 27.47        | 29.05 | 26.08 | 34.35   | 32.93             | 38.34        | 52.98             | 51.26            | 36.73         | 58.97      | 82.99          | 92.87       | 17.22            | 21.04         | 544.06            | 32.7      | 40.67         | 166.43       | 49.95   | 46.82    | 35.34  | 54.43     | 584.93    | 41.06        | 55.02          |
|             | Run1_MDS3   | 42.56       | 26.15        | 25.02 | 24.6  | 33.03   | 32.51             | 37.28        | 53.73             | 54.75            | 40.7          | 56.99      | 78.54          | 96.83       | 22.62            | 25.67         | 118.6             | 32.14     | 40.26         | 78.53        | 59.94   | 52.19    | 78.84  | 65.19     | 352.73    | 45.15        | 67.69          |
|             | Run2_MDS13  | 36.65       | 18.69        | 19.35 | 17.92 | 25.58   | 25.58             | 36.5         | 44.48             | 40.53            | 46.22         | 61.5       | 69.67          | 64.61       | 16.58            | 12.05         | 12.28             | 23.45     | 26.96         | 30.08        | 42.80   | 37.99    | 42.53  | 52.73     | 147.74    | 35.68        | 47.64          |
|             | Run2_MDS16  | 41.79       | 29.59        | 29.66 | 26.85 | 36.15   | 41.68             | 40.01        | 36.94             | 34.4             | 69.18         | 43.33      | 45.11          | 41.12       | 20.72            | 9.14          | 47.18             | 39.68     | 25.18         | 54.85        | 48.62   | 55.67    | 47.1   | 66.05     | 410.73    | 39.65        | 50.94          |
|             | Run2_MDS1   | 48.48       | 40.55        | 33.7  | 38.64 | 51.25   | 39.98             | 35.83        | 46.76             | 50.89            | 23.14         | 23.53      | 65.55          | 71.45       | 23.78            | 16.9          | 17.03             | 45.32     | 29.89         | 48.2         | 52.72   | 57.83    | 54.74  | 66.24     | 366.05    | 35.36        | 56.24          |
|             | Run2_MDS21  | 35.55       | 20.85        | 22.74 | 20.61 | 27.15   | 24.63             | 33.76        | 47.52             | 42.85            | 48.21         | 59.31      | 79.41          | 71.97       | 10.23            | 9.8           | 10.81             | 25.16     | 32.23         | 70.16        | 43.69   | 41.34    | 17.12  | 49.8      | 394.03    | 37.64        | 46.58          |
|             | Run2_MDS26* | 40.15       | 32.25        | 33.68 | 30.85 | 43.1    | 23.27             | 37.93        | 51.5              | 49.68            | 32.87         | 31.2       | 57.48          | 64.24       | 26.07            | 26.22         | 15.84             | 30.62     | 20.91         | 35.82        | 42.76   | 45.94    | 50.21  | 64.75     | 52.01     | 35.45        | 47.49          |
|             | Run2_MDS27  | 39.79       | 41.78        | 42.11 | 38.79 | 51.33   | 40.06             | 34.84        | 30.69             | 30.25            | 86.64         | 62.05      | 57.98          | 50.7        | 25.66            | 8.79          | 10.06             | 39.58     | 29.09         | 82.7         | 48.53   | 37.43    | 69.22  | 69.88     | 165.99    | 40.27        | 58.3           |
|             | Run2_MDS22  | 53.83       | 17.17        | 19.22 | 15.18 | 21.89   | 22.16             | 31.46        | 42.4              | 34.49            | 36.26         | 36.9       | 73.78          | 73.3        | 58.02            | 52.47         | 79.83             | 38.05     | 49.9          | 24.43        | 41.83   | 58.87    | 50.28  | 48.13     | 532.67    | 34.09        | 42.27          |
|             | Run2_MDS3   | 41.27       | 21.46        | 24.3  | 19.89 | 28.8    | 28.72             | 37.36        | 46.81             | 39.57            | 51.32         | 64.49      | 79.46          | 79.69       | 14.51            | 15.14         | 10.34             | 27        | 35.32         | 49.83        | 53.77   | 43.56    | 50.77  | 50.72     | 278.22    | 41.48        | 60.1           |
| Lower Risk  | Run1_MDS23  | 83.78       | 49.91        | 48.91 | 45.76 | 68.01   | 48.42             | 52.53        | 59.36             | 57.23            | 65            | 69.44      | 102.02         | 109.89      | 40.89            | 47.35         | 120.4             | 55.76     | 38.04         | 58.95        | 67.64   | 52.2     | 74.89  | 92.77     | 181.77    | 50.71        | 74.16          |
|             | Run1_MDS25  | 73.65       | 67.18        | 35.49 | 89.09 | 29.88   | 51.31             | 39.9         | 39.71             | 39.58            | 77.33         | 73.06      | 73.87          | 78.48       | 31.64            | 45.51         | 103.07            | 45.22     | 49.19         | 87.52        | 57.57   | 74.84    | 71.77  | 99.45     | 400.58    | 51.88        | 64.31          |
|             | Run1_MDS5   | 91.19       | 86.43        | 71.5  | 61.3  | 84.51   | 69.51             | 60.76        | 78.66             | 57.45            | 146.8         | 78.79      | 104.83         | 94.41       | 116.91           | 28.72         | 167.51            | 78.72     | 38.64         | 67.2         | 59.63   | 76.71    | 137.44 | 117.25    | 130.57    | 47.75        | 64.6           |
|             | Run1_MDS6   | 50.04       | 38.76        | 29.25 | 35.64 | 40.29   | 46.25             | 42.66        | 44.17             | 46.37            | 84.81         | 62.2       | 62.64          | 46.39       | 39.58            | 15.46         | 81.78             | 41.35     | 36.7          | 89.46        | 59.35   | 54.67    | 81.11  | 94.02     | 723.54    | 57.45        | 60.58          |
|             | Run1_MDS8   | 62.34       | 48.42        | 56.22 | 46.84 | 50.17   | 52.44             | 61.51        | 53.99             | 49.58            | 69.43         | 60.9       | 66.85          | 67.52       | 23.53            | 25.38         | 68.85             | 41.43     | 32.81         | 100.44       | 38.57   | 60.59    | 112.4  | 110.33    | 550.51    | 35.99        | 39.56          |
|             | Run1_MDS9   | 76.84       | 50.7         | 54.05 | 38.67 | 59.23   | 56.18             | 76.38        | 78.61             | 68.85            | 77.4          | 70.34      | 89.61          | 90.17       | 19.26            | 17.38         | 204.31            | 60.3      | 38.96         | 129.4        | 59.37   | 75.98    | 177.36 | 127.72    | 216.58    | 52.11        | 62.97          |
|             | Run2_MDS12  | 69.93       | 44.8         | 34.59 | 39.57 | 42.9    | 37.4              | 36.32        | 45.94             | 47.3             | 43.7          | 57.19      | 86.38          | 85.54       | 11.25            | 12.59         | 32.64             | 35.09     | 39.27         | 54.45        | 36.78   | 35.37    | 52.29  | 56.5      | 321.37    | 35.15        | 37.95          |
|             | Run2_MDS14  | 46.17       | 40.72        | 32.18 | 64.83 | 47.18   | 46.68             | 52.1         | 35.39             | 34.48            | 60.59         | 46.39      | 56.92          | 46.88       | 8.45             | 6.18          | 55.11             | 36.29     | 36.07         | 63.51        | 59.22   | 70.97    | 55.24  | 105       | 391.36    | 45.46        | 68.51          |
|             | Run2_MDS19  | 55.39       | 43.42        | 42.19 | 39.02 | 57.56   | 51.3              | 40.46        | 40.85             | 38.9             | 56.04         | 58.56      | 65.79          | 54.46       | 12.04            | 10.26         | 10.05             | 48.2      | 34.47         | 109.36       | 69.81   | 56.8     | 68.76  | 66.05     | 562.04    | 42.5         | 78.95          |
|             | Run2_MDS20  | 54.15       | 39.64        | 39.56 | 32.29 | 53.56   | 56.02             | 52.38        | 44.67             | 40.44            | 65.49         | 56.74      | 67.94          | 57.4        | 26.63            | 16.17         | 76.74             | 46.68     | 44.38         | 72.73        | 46.91   | 40.82    | 77.75  | 93.25     | 371.3     | 42.56        | 47.63          |
| Run2_MDS28* | 92.3        | 42.42       | 36.38        | 39.84 | 50.85 | 44.82   | 41.66             | 49.75        | 47.26             | 72.11            | 70.61         | 108.88     | 110.56         | 18.59       | 15.23            | 106.06        | 45.6              | 32.04     | 41.67         | 52.49        | 55.49   | 86.05    | 88.32  | 603.77    | 42.99     | 62.72        |                |
| Run2_MDS5   | 72.69       | 60.12       | 43.6         | 44.13 | 58.29 | 62.54   | 50.19             | 67.43        | 45.62             | 108.48           | 63.45         | 85.2       | 74.51          | 79.11       | 24.78            | 118.14        | 55.31             | 29.63     | 49.77         | 47.3         | 66.1    | 119.81   | 104.7  | 170.71    | 37.18     | 52.43        |                |
| ICUS        | Run1_ICUS18 | 71.44       | 40.7         | 39.41 | 27.83 | 47.12   | 59.34             | 46.6         | 42.35             | 39.97            | 84.08         | 79.49      | 86.06          | 73.03       | 39.73            | 35.74         | 99.43             | 58.75     | 35.17         | 102.84       | 73      | 71.08    | 77.54  | 66.15     | 414.91    | 61.02        | 75.23          |
|             | Run1_ICUS22 | 74.3        | 47           | 48.67 | 38.97 | 55.19   | 65.74             | 69.3         | 57.6              | 52.01            | 87.67         | 81.56      | 90.44          | 75.01       | 27.7             | 36.48         | 106.36            | 54.04     | 42.54         | 65.8         | 75.72   | 77.84    | 103.11 | 103.17    | 347.19    | 60.06        | 81.78          |
|             | Run1_ICUS24 | 68.44       | 50.05        | 44.2  | 45.04 | 61.36   | 49.19             | 40.33        | 43.39             | 44.73            | 87.83         | 75.56      | 83.37          | 72.11       | 20.4             | 22.74         | 183.59            | 45.52     | 41.05         | 44.7         | 59.22   | 52.6     | 68.47  | 81.35     | 788.17    | 44.42        | 75.28          |
| Normal      | Run1_NI-1   | 69.07       | 40.39        | 38.59 | 31.6  | 63.24   | 48.87             | 52.57        | 46.86             | 43.73            | 92.44         | 72.11      | 78.18          | 68.88       | 30.96            | 33.52         | 116.59            | 41.62     | 38.48         | 51.43        | 68.58   | 74.89    | 73.3   | 125.66    | 1085.1    | 55.31        | 76.54          |
|             | Run1_NI-3   | 54.92       | 43.03        | 40.94 | 38.84 | 48.97   | 41.83             | 33.32        | 36.97             | 35.91            | 77.67         | 55.08      | 61.83          | 54.42       | 44.6             | 32.65         | 76.67             | 39.57     | 26.9          | 57.63        | 47.9    | 49.06    | 56.8   | 83.49     | 146.11    | 35.13        | 57.55          |
|             | Run1_NI-4   | 64.25       | 54.81        | 46.99 | 39.82 | 49.95   | 41.35             | 30.11        | 29.55             | 28               | 82.18         | 68.25      | 73.56          | 65.04       | 49.33            | 30.94         | 90.21             | 36.28     | 33.19         | 81.11        | 44.48   | 48.81    | 56.01  | 83.85     | 140.06    | 37.28        | 52.15          |
|             | Run1_NI-6   | 58.33       | 46.04        | 45.35 | 40.73 | 58.98   | 49.07             | 36.41        | 38.71             | 36.76            | 76.28         | 57.67      | 67.37          | 61.01       | 26.93            | 74.77         | 43.56             | 29.71     | 73.29         | 55.02        | 67.58   | 92.3     | 117.04 | 117.04    | 38.48     | 60.05        |                |
|             | Run2_NI-3   | 37.64       | 36.09        | 36.82 | 32.48 | 41.74   | 35.66             | 27.97        | 30.2              | 30.19            | 58.47         | 40.87      | 34.44          | 26.59       | 22.51            | 43.23         | 30.96             | 22.35     | 45.33         | 40.01        | 39.21   | 41.6     | 63.76  | 180.89    | 28.6      | 48.95        | 52.15          |
|             | Run2_NI-4   | 44.04       | 41.07        | 46.35 | 36.93 | 44.51   | 35.41             | 23.45        | 22.96             | 22.13            | 63.48         | 45.91      | 49.19          | 41          | 29.5             | 20.74         | 55.39             | 30.59     | 27.64         | 74.22        | 39.12   | 39.06    | 43.47  | 61.49     | 179.55    | 32.74        | 45.64          |
| Run2_NI-5   | 34.79       | 34.56       | 35.87        | 30.6  | 41.46 | 30.44   | 23.15             | 22.84        | 22.59             | 60.31            | 42.56         | 41.27      | 32.19          | 18.95       | 10.08            | 38.23         | 30.73             | 22.67     | 57.92         | 35.59        | 36.69   | 37.75    | 54.33  | 193.38    | 28.82     | 42.87        |                |
| Run2_NI-6   | 42.52       | 40.6        | 39.61        | 36.63 | 49.92 | 42.3    | 31.25             | 33.38        | 32.04             | 50.12            | 41.6          | 49.79      | 41.02          | 19.95       | 15.86            | 38.42         | 34.98             | 24.41     | 59.67         | 46.72        | 46.76   | 55.13    | 73.01  | 255.89    | 33.76     | 52.59        |                |

Supplemental Table 3: Median expression of each surface marker on each cell population.

|             |             | CD8 Median |              |      |      |         |                   |              |                   |                  |               |            |                |             |                  |               |                   |           |               |              |         |          |      |           |           |              |                |
|-------------|-------------|------------|--------------|------|------|---------|-------------------|--------------|-------------------|------------------|---------------|------------|----------------|-------------|------------------|---------------|-------------------|-----------|---------------|--------------|---------|----------|------|-----------|-----------|--------------|----------------|
|             |             | Ungated    | CD34-CD38low | HSCs | MPP  | CMP/GMP | Myelo/Mono-Blasts | ProMonocytes | CD14neg Monocytes | Mature Monocytes | ProMyelocytes | Myelocytes | MetaMyelocytes | MatureGrans | ProErythroblasts | Erythroblasts | LateErythroblasts | PreBCells | Mature Bcells | Plasma Cells | T cells | NK cells | pDCs | Basophils | Platelets | CD8+ T cells | CD8neg T cells |
| AML/BAEB-T  | Run1_MDS17  | 3.72       | 1.87         | 1.99 | 1.72 | 3.03    | 1.49              | 3.27         | 4.39              | 3.92             | 3.99          | 7.95       | 7.36           | 8.13        | 1                | 1.05          | 1.85              | 3.61      | 1.34          | 2.31         | 79.69   | 10.47    | 4.79 | 1.06      | 3.54      | 173.28       | 2.19           |
|             | Run2_MDS15* | 1.97       | 3.04         | 2.63 | 2.27 | 2.21    | 2.11              | 1.96         | 1.73              | 1.59             | 2.09          | 1.81       | 1.93           | 2           | 2.34             | 2.06          | 3.19              | 1.83      | 1.42          | 2.75         | 10.86   | 16.57    | 2.13 | 2.71      | 3.81      | 271.61       | 2.61           |
|             | Run2_MDS4   | 1.73       | 1.61         | 1.72 | 1.22 | 0.77    | 0.86              | 1.16         | 1.56              | 2.09             | 1.65          | 1.61       | 1.71           | 1.8         | 0.35             | 0.54          | 0.76              | 1.92      | 1.07          | 1.06         | 14.34   | 10.2     | 1.03 | 2.23      | 4.48      | 186.36       | 1.54           |
| Higher Risk | Run1_MDS21  | 2.42       | 1.57         | 1.63 | 1.35 | 1.82    | 1.66              | 2.38         | 2.81              | 3.28             | 2             | 3.04       | 3.42           | 4.25        | 0.82             | 1.52          | 9.72              | 1.71      | 1.84          | 3.74         | 4.48    | 5.35     | 1.98 | 2.71      | 8.93      | 76.33        | 2.42           |
|             | Run1_MDS3   | 2.72       | 1.58         | 1.69 | 1.37 | 1.94    | 1.83              | 2.6          | 3.32              | 3.39             | 2.61          | 3.7        | 4.16           | 5.31        | 0.99             | 1.42          | 4.75              | 1.45      | 1.84          | 3.3          | 4.94    | 6.78     | 5.19 | 2.85      | 7.14      | 158.47       | 2.84           |
|             | Run2_MDS13  | 2.1        | 1.06         | 1.25 | 0.98 | 1.36    | 1.23              | 2.21         | 3.03              | 3.11             | 2.5           | 3.46       | 3.21           | 3.36        | 0.72             | 0.51          | 1.09              | 0.92      | 0.93          | 1.66         | 4.44    | 4.12     | 2    | 1.69      | 4.43      | 114.99       | 2.03           |
|             | Run2_MDS16  | 1.83       | 1.64         | 1.89 | 1.3  | 1.16    | 1.43              | 1.52         | 1.59              | 1.57             | 2.25          | 1.57       | 1.74           | 1.66        | 0.88             | 0.4           | 2.03              | 2.33      | 0.84          | 2.75         | 2.46    | 5.34     | 2.12 | 2.41      | 7.29      | 208.58       | 1.74           |
|             | Run2_MDS1   | 1.79       | 1.7          | 2.55 | 1.32 | 1.85    | 1.22              | 1.02         | 1.22              | 1.8              | 0.89          | 0.82       | 2.26           | 2.49        | 0.65             | 0.74          | 0.9               | 2.46      | 1.45          | 1.65         | 2.51    | 4.41     | 1.76 | 3.95      | 5.01      | 171.01       | 1.85           |
|             | Run2_MDS21  | 1.89       | 1.03         | 1.13 | 0.93 | 1.29    | 1.06              | 1.34         | 2.12              | 2.38             | 2.75          | 3.22       | 2.86           | 2.98        | 0.35             | 0.4           | 0.85              | 1.04      | 1.32          | 3.19         | 3.84    | 3.6      | 1.06 | 1.81      | 6.45      | 72.66        | 1.94           |
|             | Run2_MDS26* | 1.42       | 1.5          | 1.53 | 1.44 | 1.73    | 0.93              | 1.58         | 2.06              | 2.3              | 1.24          | 1.17       | 2.01           | 2.35        | 0.99             | 0.88          | 0.7               | 3.48      | 0.68          | 1.03         | 4.25    | 2.08     | 0.97 | 2.3       | 2.08      | 142.22       | 1.75           |
|             | Run2_MDS27  | 1.96       | 2.12         | 2.36 | 1.76 | 1.99    | 1.8               | 1.76         | 1.51              | 1.57             | 2.61          | 2.31       | 1.96           | 1.93        | 1.05             | 0.32          | 0.67              | 4.52      | 1.16          | 2.81         | 62.15   | 2.99     | 2.45 | 2.08      | 5.39      | 201.93       | 1.96           |
|             | Run2_MDS2   | 1.72       | 0.69         | 1.14 | 0.52 | 0.73    | 0.59              | 0.43         | 1.08              | 1.26             | 1.38          | 1.21       | 2.35           | 2.61        | 2.14             | 1.96          | 3.31              | 1.55      | 2.58          | 0.03         | 1.44    | 2.8      | 0.25 | 1.37      | 5.18      | 223.22       | 1.23           |
|             | Run2_MDS3   | 2.56       | 1.18         | 1.3  | 1.06 | 1.49    | 1.31              | 2.01         | 3.41              | 4.1              | 3.35          | 4.79       | 4.7            | 5.65        | 0.6              | 0.68          | 0.63              | 1.2       | 1.31          | 1.84         | 4.15    | 3.72     | 2.32 | 1.88      | 5.33      | 146.49       | 2.25           |
| Lower Risk  | Run1_MDS23  | 3.89       | 2.71         | 2.48 | 2.39 | 3.16    | 2.35              | 3.33         | 3.4               | 3.28             | 4.69          | 4.27       | 4.39           | 4.38        | 1.52             | 1.79          | 4.73              | 3.51      | 1.82          | 3.12         | 4.49    | 2.87     | 3.05 | 3.65      | 6.79      | 157.56       | 2.89           |
|             | Run1_MDS25  | 3.14       | 6.22         | 3.63 | 4.27 | 0.79    | 2.07              | 1.72         | 1.7               | 1.89             | 3.04          | 2.87       | 2.91           | 3.1         | 1.14             | 2.2           | 5.68              | 3.18      | 2.31          | 2.85         | 18.77   | 4.09     | 2.89 | 3.92      | 7.5       | 268.11       | 2.73           |
|             | Run1_MDS5   | 3.66       | 3.9          | 1.99 | 3.11 | 2.31    | 3.31              | 2.29         | 3.61              | 4                | 4.57          | 3.01       | 3.66           | 3.83        | 4.42             | 1.63          | 5.32              | 4.1       | 1.76          | 3.37         | 3.91    | 3.27     | 5.5  | 4.16      | 4.37      | 246.1        | 2.57           |
|             | Run1_MDS6   | 2.85       | 2.37         | 1.47 | 3.36 | 2       | 2.4               | 2.7          | 2.9               | 3.05             | 3.44          | 3.04       | 3.02           | 2.57        | 1.69             | 0.72          | 4.54              | 2.63      | 1.64          | 4.27         | 7.99    | 59.04    | 3.33 | 3.66      | 9.94      | 206.12       | 2.72           |
|             | Run1_MDS8   | 2.94       | 3.01         | 3.72 | 2.15 | 2.27    | 2.18              | 2.68         | 2.63              | 2.56             | 2.87          | 2.88       | 2.84           | 2.95        | 0.86             | 1.09          | 3.89              | 2.33      | 1.37          | 1.49         | 2.75    | 5.87     | 3.95 | 4.13      | 8.97      | 70.59        | 1.7            |
|             | Run1_MDS9   | 3.64       | 2.64         | 2.85 | 2.06 | 3.18    | 2.64              | 3.24         | 2.95              | 3.27             | 3.35          | 3.15       | 3.49           | 3.55        | 0.85             | 0.89          | 7.34              | 5.88      | 1.76          | 6.18         | 5.57    | 19.34    | 3.3  | 4.34      | 6.11      | 126.53       | 2.68           |
|             | Run2_MDS12  | 2.62       | 2.01         | 2.26 | 1.59 | 2.07    | 1.83              | 2.09         | 2.41              | 2.41             | 1.97          | 2.45       | 3.13           | 3.19        | 0.44             | 0.48          | 1.37              | 2.28      | 1.57          | 1.31         | 4.15    | 1.68     | 1.95 | 1.9       | 5.9       | 118.91       | 1.49           |
|             | Run2_MDS14  | 2.23       | 2.49         | 0.86 | 2.09 | 2.23    | 1.83              | 2.03         | 2.29              | 2.42             | 2.54          | 2.21       | 2.71           | 2.22        | 0.49             | 0.2           | 2.51              | 1.68      | 1.26          | 2.06         | 4.44    | 3.52     | 1.76 | 3.33      | 4.41      | 218.96       | 2.28           |
|             | Run2_MDS19  | 2.18       | 2.29         | 2.54 | 1.98 | 2.17    | 2.01              | 1.76         | 1.76              | 1.73             | 2.29          | 2.37       | 2.4            | 2.13        | 0.56             | 0.39          | 0.98              | 2.95      | 1.39          | 3.66         | 2.93    | 2.5      | 2.02 | 8.93      | 210.2     | 2.55         |                |
|             | Run2_MDS20  | 2.23       | 1.92         | 2.39 | 2.02 | 1.96    | 1.9               | 1.98         | 1.74              | 1.96             | 2.42          | 2.24       | 2.4            | 2.28        | 0.66             | 0.86          | 2.81              | 3.37      | 1.95          | 4.58         | 1.97    | 1.8      | 2.67 | 2.97      | 6.95      | 181.67       | 1.66           |
| Run2_MDS28* | 3.75        | 2.32       | 2.18         | 2.12 | 1.95 | 2.26    | 2.22              | 2.57         | 2.53              | 3.1              | 2.99          | 4.04       | 4              | 0.83        | 0.75             | 2.33          | 3.3               | 3.3       | 1.24          | 2.25         | 9.1     | 4.25     | 3.12 | 2.63      | 8.53      | 130.65       | 2.4            |
| Run2_MDS5   | 2.51        | 3.66       | 1.94         | 1.72 | 2.68 | 2.34    | 1.47              | 2.9          | 2.84              | 3.09             | 1.89          | 2.45       | 2.66           | 2.89        | 1.06             | 3.48          | 2.7               | 1.24      | 1.79          | 3.48         | 2.27    | 1.96     | 3.4  | 3.54      | 212.24    | 1.91         |                |
| ICUS        | Run1_ICUS18 | 3.36       | 2.92         | 1.47 | 2.92 | 3.33    | 2.47              | 2.48         | 2.07              | 2.42             | 3.76          | 3.66       | 3.52           | 3.22        | 1.49             | 1.67          | 3.81              | 3.7       | 1.48          | 3.42         | 3.77    | 5.93     | 3.03 | 2.66      | 8.95      | 210.9        | 2.97           |
|             | Run1_ICUS22 | 3.17       | 2.55         | 2.49 | 2.3  | 2.53    | 2.63              | 2.85         | 2.25              | 2.36             | 3.7           | 3.41       | 3.51           | 3.04        | 1.13             | 1.5           | 3.98              | 2.93      | 1.82          | 2.99         | 4.95    | 4.64     | 3.79 | 3.65      | 7.71      | 130.19       | 3.26           |
|             | Run1_ICUS24 | 3.26       | 2.74         | 3.14 | 2.53 | 3.04    | 2.4               | 2.36         | 2.26              | 2.25             | 3.58          | 3.46       | 3.42           | 3.09        | 0.79             | 0.95          | 6.44              | 2.3       | 1.83          | 2.21         | 8.51    | 3.34     | 2.74 | 3.43      | 10.74     | 113.17       | 3.21           |
| Normal      | Run1_NI-1   | 3.01       | 2.08         | 1.93 | 1.85 | 2.54    | 2.24              | 2.56         | 2.35              | 2.21             | 3.58          | 3.09       | 3.16           | 2.88        | 1.01             | 1.46          | 4.61              | 2.02      | 1.66          | 2.71         | 5.24    | 3.77     | 2.96 | 4.51      | 12.49     | 178.21       | 2.94           |
|             | Run1_NI-3   | 3.23       | 2.96         | 2.57 | 2.72 | 2.54    | 2.79              | 4.6          | 5.92              | 4.06             | 3.46          | 2.99       | 3.3            | 2.98        | 1.95             | 1.56          | 3.97              | 2.69      | 1.08          | 2.99         | 5.52    | 5.01     | 2.5  | 3.44      | 4.92      | 189.51       | 2.39           |
|             | Run1_NI-4   | 3.59       | 3.19         | 2.95 | 2.96 | 2.86    | 2.93              | 5.63         | 6.42              | 4.43             | 3.62          | 3.41       | 3.63           | 3.42        | 1.71             | 1.37          | 4.2               | 2.52      | 1.39          | 3.66         | 6.72    | 4.59     | 2.53 | 3.01      | 4.75      | 141.59       | 2.35           |
|             | Run1_NI-6   | 3.12       | 2.78         | 3.04 | 2.08 | 2.98    | 3.03              | 4.64         | 5.81              | 4.5              | 3.42          | 3.17       | 3.54           | 3.23        | 1.28             | 1.18          | 3.5               | 2.18      | 1.19          | 3.44         | 4.22    | 2.92     | 3.63 | 4.75      | 170.86    | 2.47         |                |
|             | Run2_NI-3   | 2.16       | 2            | 1.81 | 1.76 | 2.15    | 2.15              | 3.21         | 4.12              | 3.04             | 2.32          | 1.94       | 2.16           | 1.99        | 0.95             | 0.8           | 2.24              | 1.9       | 0.78          | 1.75         | 4.4     | 3.3      | 1.42 | 2.12      | 4.79      | 171.13       | 1.77           |
|             | Run2_NI-4   | 2.53       | 2.65         | 3.02 | 2.09 | 1.98    | 2.36              | 4.08         | 4.74              | 3.32             | 2.5           | 2.21       | 2.52           | 2.4         | 0.97             | 0.83          | 2.63              | 1.94      | 1.04          | 2.63         | 6.29    | 3.57     | 1.57 | 2.33      | 4.1       | 125.13       | 1.81           |
| Run2_NI-5   | 2.38        | 2.28       | 2.26         | 1.9  | 1.85 | 2       | 3.64              | 4.66         | 3.67              | 2.34             | 2.07          | 2.45       | 2.29           | 0.74        | 0.4              | 2.39          | 1.7               | 0.84      | 2.57          | 7.61         | 6.82    | 1.62     | 1.99 | 5.37      | 195.22    | 1.6          |                |
| Run2_NI-6   | 2.08        | 2          | 2.62         | 1.76 | 2.19 | 2.28    | 3.66              | 4.15         | 3.48              | 2.08             | 1.97          | 2.34       | 2.09           | 0.81        | 0.6              | 1.57          | 1.51              | 0.92      | 2.55          | 3.12         | 2.97    | 1.99     | 2.5  | 4.6       | 152.97    | 1.84         |                |



Supplemental Table 3: Median expression of each surface marker on each cell population.

|             |             | CD34 Median |                         |        |        |         |                   |              |                   |                  |               |            |                |             |                  |               |                   |           |               |              |         |          |       |           |           |              |                |
|-------------|-------------|-------------|-------------------------|--------|--------|---------|-------------------|--------------|-------------------|------------------|---------------|------------|----------------|-------------|------------------|---------------|-------------------|-----------|---------------|--------------|---------|----------|-------|-----------|-----------|--------------|----------------|
|             |             | Ungated     | CD34<sup>-</sup>CD38low | HSCs   | MPP    | CMP/GMP | Myelo/Mono-Blasts | ProMonocytes | CD14neg Monocytes | Mature Monocytes | ProMyelocytes | Myelocytes | MetaMyelocytes | MatureGrans | ProErythroblasts | Erythroblasts | LateErythroblasts | PreBcells | Mature Bcells | Plasma Cells | T cells | NK cells | pDCs  | Basophils | Platelets | CD8+ T cells | CD8neg T cells |
| AML/RAEB-T  | Run1_MDS17  | 1.31        | 50.67                   | 61.19  | 48.38  | 64.27   | 13.48             | 2.03         | 1.2               | 0.95             | 0.95          | 0.95       | 0.65           | 0.9         | 0.52             | -0.07         | 0.32              | 2.2       | 0.1           | 1.5          | 0.34    | 1.08     | 3.82  | 1.53      | 2.2       | 0.68         | -0.1           |
|             | Run2_MDS15* | 1.08        | 293.81                  | 263.47 | 237.16 | 75.4    | 7.55              | 1.44         | 0.6               | 0.62             | 1.9           | 0.72       | 0.49           | 0.35        | 31.31            | 0.83          | 1.63              | 0.91      | 0.68          | 3.61         | 0.41    | 1.82     | 31.15 | 1.76      | 18.53     | 0.67         | 0.14           |
|             | Run2_MDS4   | 0.1         | 109.73                  | 187.52 | 97.36  | 23.89   | 1.21              | 0.28         | 0.27              | 0.28             | -0.03         | -0.16      | -0.68          | 0.01        | -0.01            | -0.13         | -0.07             | 0.44      | 0.35          | 0.19         | -0.04   | 0.55     | 0.22  | -0.65     | 0.95      | 0.3          | -0.21          |
| Higher Risk | Run1_MDS21  | 0.56        | 49.33                   | 52.65  | 47.41  | 63.49   | 54.87             | 5.19         | 1.73              | 2.34             | 0.04          | 0.21       | 0.21           | 0.6         | -0.07            | 0.26          | 1.58              | -0.03     | -0.02         | 0.13         | -0.03   | 1.68     | 14.13 | 0.17      | 1.13      | 0.59         | -0.19          |
|             | Run1_MDS3   | 0.29        | 70.65                   | 80.36  | 65.21  | 86.03   | 70.51             | 6.91         | 1.34              | 2.91             | -0.08         | 0          | 0.14           | 0.61        | -0.04            | 0.09          | 0.58              | -0.14     | 0             | 0.93         | -0.03   | 1.5      | 1.69  | 0.11      | 0.87      | 0.6          | -0.19          |
|             | Run2_MDS13  | 0.34        | 91.9                    | 105.28 | 83.01  | 82.81   | 64.29             | 0.62         | 0.62              | 0.72             | -0.01         | 0.04       | 0.01           | 0.16        | 0.44             | -0.16         | -0.01             | -0.07     | -0.11         | 0.95         | -0.03   | 0.86     | 3.41  | 0.39      | 0.39      | 0.42         | -0.17          |
|             | Run2_MDS16  | -0.05       | 134.03                  | 145.94 | 129.64 | 130.97  | 0.85              | 0.19         | 0.28              | 0.33             | -0.12         | -0.12      | -0.17          | -0.11       | 36.38            | -0.23         | -0.02             | 0.25      | -0.16         | 0.59         | -0.1    | 0.84     | 0.84  | 0.01      | 0.95      | 0.42         | -0.17          |
|             | Run2_MDS1   | 0           | 30.62                   | 52.43  | 28.37  | 27.4    | 1.74              | 0.24         | 0.1               | 0.29             | -0.22         | -0.21      | -0.05          | 0.15        | -0.12            | -0.14         | -0.19             | 0.28      | -0.09         | 0.63         | -0.18   | 1.28     | 0     | -0.05     | 0.25      | 0.28         | -0.24          |
|             | Run2_MDS21  | 0.3         | 54.42                   | 59.94  | 51.4   | 70.7    | 53.08             | 0.37         | 0.45              | 0.67             | -0.06         | -0.05      | -0.01          | 0.12        | 0.22             | -0.18         | -0.07             | 0.08      | -0.04         | 0.92         | -0.02   | 0.82     | 12.6  | 0.07      | 0.8       | 0.45         | -0.14          |
|             | Run2_MDS26* | -0.18       | 38.59                   | 42.95  | 37.24  | 35.94   | 3.92              | 0.44         | 0.44              | 1.14             | -0.22         | -0.22      | -0.38          | -0.15       | 2.54             | -0.22         | -0.23             | 0         | -0.23         | 0.79         | -0.08   | 0.37     | 0.62  | -0.07     | -0.18     | 0.29         | -0.21          |
|             | Run2_MDS27  | 0.36        | 170.12                  | 197.48 | 146.59 | 76.36   | 9.47              | 0.62         | 0.48              | 0.6              | 0.16          | -0.08      | 0              | 0.26        | 14.21            | -0.21         | -0.15             | 0.87      | 0.18          | 1.93         | 0.18    | 0.64     | 0.36  | 0.49      | 5.94      | 0.45         | -0.1           |
|             | Run2_MDS2   | 0.03        | 93.84                   | 104.13 | 93.19  | 84.93   | 34.98             | 0.33         | -0.03             | 0.59             | 1.19          | -0.22      | -0.11          | -0.05       | 0.35             | 0.41          | 0.55              | 0.22      | 1.18          | -0.39        | -0.25   | 0.23     | -0.24 | -0.13     | 0.37      | 0.24         | -0.28          |
|             | Run2_MDS3   | 0.24        | 90.74                   | 109.1  | 80.17  | 106.77  | 71.22             | 0.39         | 0.42              | 1.01             | 0             | 0.14       | 0.14           | 0.39        | 0.58             | -0.13         | -0.15             | -0.08     | -0.09         | 0.54         | -0.04   | 0.89     | 1.71  | 0.5       | 0.72      | 0.49         | -0.17          |
| Lower Risk  | Run1_MDS23  | 0.26        | 65.77                   | 99.92  | 57.14  | 47.25   | 0.55              | 0.25         | 0.23              | 0.27             | 0.4           | 0.31       | 0.28           | 0.37        | -0.1             | -0.05         | 0.37              | 0.31      | -0.24         | 0.41         | -0.06   | 0.92     | 0.34  | -0.08     | 0.46      | 0.55         | -0.18          |
|             | Run1_MDS25  | 0.36        | 23.34                   | 154.42 | 30.95  | 54.29   | 0.48              | 0.39         | 0.38              | 0.44             | 0.34          | 0.05       | 0.26           | 0.39        | -0.04            | 0.09          | 1.15              | 0.27      | -0.1          | 0.72         | 0.13    | 0.48     | 0.49  | -0.05     | 0.39      | 0.58         | -0.19          |
|             | Run1_MDS5   | 0.49        | 58.42                   | 136.51 | 37.32  | 80.16   | 3.07              | 0.74         | 0.84              | 0.93             | 0.87          | 0.27       | 0.39           | 0.5         | 0.84             | 0             | 0.84              | 0.47      | 0.75          | -0.19        | 0.57    | -0.06    | 3.72  | 0.77      | -0.08     | 0            | 0.57           |
|             | Run1_MDS6   | 0.25        | 91.69                   | 69.78  | 46.94  | 61.42   | 4.75              | 1.28         | 1.39              | 1.08             | 0.67          | 0.41       | 0.3            | 0.16        | 1.45             | -0.2          | 0.74              | 0.26      | -0.13         | 1.01         | 0.63    | 1.24     | 1.02  | 0.17      | 2.02      | 0.59         | -0.22          |
|             | Run1_MDS8   | -0.03       | 132.23                  | 135.77 | 122.6  | 98.69   | 2.12              | 0.42         | 0.31              | 0.38             | -0.02         | -0.14      | -0.11          | -0.05       | 0.07             | -0.1          | 0.38              | -0.11     | -0.2          | 0.47         | -0.22   | 0.71     | 1.6   | 0.59      | 1.19      | 0.17         | -0.3           |
|             | Run1_MDS9   | 0.17        | 84.33                   | 117.16 | 49.15  | 80.26   | 15.65             | 0.31         | 0.22              | 0.4              | -0.02         | -0.07      | 0.09           | 0.19        | 0.06             | -0.11         | 0.59              | 0.41      | -0.16         | 0.72         | -0.06   | 0.83     | 0.5   | 0.51      | 0.27      | 0.46         | -0.24          |
|             | Run2_MDS12  | -0.07       | 52.28                   | 90.71  | 64.2   | 76.07   | 0.94              | 0.64         | 0.56              | 0.7              | -0.14         | -0.15      | -0.1           | -0.07       | 0.07             | -0.22         | -0.13             | 0.39      | -0.13         | 0.32         | -0.1    | 1.14     | 0.48  | 0.04      | 1.1       | 0.33         | -0.22          |
|             | Run2_MDS14  | -0.03       | 48.79                   | 46.51  | 57.62  | 39.22   | 0.31              | 0.09         | 0.26              | 0.18             | -0.08         | -0.13      | -0.08          | -0.02       | -0.02            | -0.22         | 0.06              | -0.03     | -0.17         | 0.23         | -0.08   | 1.17     | 0.77  | 0.14      | 0.95      | 0.33         | -0.22          |
|             | Run2_MDS19  | -0.05       | 164.54                  | 178.84 | 156.45 | 102.49  | 1.33              | 0.25         | 0.07              | 0.12             | -0.1          | -0.1       | -0.1           | -0.01       | 0.29             | -0.23         | -0.2              | 0.25      | -0.16         | 0.35         | -0.11   | 0.89     | 0.9   | 0.52      | 3.59      | 0.44         | -0.2           |
|             | Run2_MDS20  | -0.07       | 88.27                   | 161.28 | 66.97  | 121.49  | 0.33              | 0.12         | 0.06              | 0.16             | -0.08         | -0.12      | -0.09          | -0.03       | 0.51             | -0.2          | 0                 | 0.04      | -0.05         | 1.59         | -0.19   | 0.33     | 0.29  | 0.19      | 0.5       | 0.33         | -0.22          |
| Run2_MDS28* | 0.07        | 88.11       | 127.52                  | 75.24  | 88.59  | 1.14    | 0.51              | 0.33         | 0.6               | 0.05             | -0.03         | 0.1        | 0.0            | 1.3         | -0.22            | 0.01          | 0.28              | -0.3      | -0.09         | -0.04        | 0.67    | 0.67     | 0.14  | 0.67      | 0.36      | -0.2         |                |
| Run2_MDS5   | 0.43        | 88.55       | 207.49                  | 65.5   | 61.26  | 2.28    | 0.61              | 0.64         | 1.05              | 0.35             | 0.14          | 0.32       | 0.47           | 0.77        | -0.13            | 0.4           | 0.67              | -0.19     | 0.33          | -0.1         | 3.11    | 0.7      | 0.72  | -0.01     | 0.4       | -0.21        |                |
| ICUS        | Run1_ICUS18 | 0.3         | 123.49                  | 192.06 | 85.63  | 140.05  | 0.61              | 0.32         | 0.39              | 0.37             | 0.18          | -0.03      | 0.16           | 0.35        | -0.05            | -0.16         | 0.54              | 0.14      | -0.22         | 0.46         | -0.13   | 0.61     | 0.45  | -0.07     | 2.66      | 0.62         | -0.21          |
|             | Run1_ICUS22 | 0.03        | 109.25                  | 131.63 | 86.13  | 68.17   | 0.76              | 0.34         | 0.16              | 0.18             | -0.06         | -0.13      | -0.07          | 0.06        | -0.07            | -0.08         | 0.25              | 0.12      | -0.19         | 0.02         | -0.08   | 0.28     | 0.39  | 0.21      | 1.22      | 0.42         | -0.18          |
|             | Run1_ICUS24 | 0.05        | 131.23                  | 151.83 | 102.25 | 59.7    | 2.25              | 0.48         | 0.29              | 0.3              | 0.04          | -0.08      | -0.06          | 0.09        | -0.05            | -0.19         | 0.77              | 0.01      | -0.19         | 0.39         | 0.01    | 0.4      | 1.64  | 0.34      | 1.67      | 0.42         | -0.17          |
| Normal      | Run1_NI-1   | -0.02       | 119.58                  | 140.16 | 103.09 | 39.69   | 0.97              | 0.3          | 0.26              | 0.3              | -0.07         | -0.14      | -0.07          | 0           | -0.04            | -0.12         | 0.48              | -0.06     | -0.24         | 0.4          | -0.06   | 0.57     | 0.87  | 0.18      | 1.95      | 0.53         | -0.22          |
|             | Run1_NI-3   | 0.21        | 182.12                  | 182.03 | 156.53 | 95.03   | 3.14              | 0.83         | 0.71              | 0.51             | 0.26          | -0.03      | 0.15           | 0.23        | 0.77             | -0.1          | 0.47              | 0.22      | -0.24         | 0.56         | 0.05    | 0.91     | 1.07  | 0.2       | 2.1       | 0.63         | -0.2           |
|             | Run1_NI-4   | 0.27        | 182.95                  | 220.43 | 162.18 | 105.12  | 2.24              | 0.67         | 0.54              | 0.47             | 0.57          | 0.1        | 0.22           | 0.28        | 0.67             | -0.11         | 0.48              | -0.06     | -0.18         | 0.9          | 0.07    | 0.66     | 1.29  | 0.48      | 1.9       | 0.55         | -0.18          |
|             | Run1_NI-6   | 0.26        | 142.1                   | 156.67 | 124.4  | 67.6    | 3.48              | 0.81         | 0.6               | 0.57             | 0.52          | 0.18       | 0.22           | 0.27        | 0.26             | -0.14         | 0.42              | 0.25      | -0.2          | 0.78         | -0.07   | 0.65     | 0.84  | 0.68      | 4         | 0.54         | -0.19          |
|             | Run2_NI-3   | 0.07        | 161.86                  | 194.12 | 160.74 | 80.98   | 2.12              | 0.53         | 0.39              | 0.39             | -0.04         | -0.09      | 0.05           | 0.18        | 0.61             | -0.16         | 0.25              | 0.1       | -0.24         | 0.47         | -0.05   | 0.65     | 0.8   | 0.02      | 1.97      | 0.39         | -0.2           |
|             | Run2_NI-4   | 0.17        | 185.08                  | 278.46 | 152.75 | 93.38   | 1.6               | 0.52         | 0.44              | 0.41             | 0.02          | -0.03      | 0.17           | 0.28        | 0.62             | -0.17         | 0.27              | 0.1       | -0.16         | 0.78         | -0.02   | 0.5      | 1.15  | 0.31      | 2.57      | 0.31         | -0.17          |
| Run2_NI-5   | 0.16        | 157.97      | 205.4                   | 123.43 | 64.56  | 1.21    | 0.48              | 0.44         | 0.44              | -0.05            | -0.09         | 0.12       | 0.29           | 0.61        | -0.21            | 0.25          | 0.05              | -0.18     | 0.68          | -0.03        | 0.61    | 1.09     | 0.25  | 2.04      | 0.4       | -0.23        |                |
| Run2_NI-6   | 0.12        | 128.71      | 148.83                  | 116.94 | 81.68  | 2.34    | 0.51              | 0.5          | 0.49              | -0.06            | -0.08         | 0.02       | 0.34           | 0.36        | -0.18            | 0.02          | 0.13              | -0.19     | 0.6           | -0.08        | 0.48    | 0.67     | 0.25  | 4.47      | 0.33      | -0.17        |                |

Supplemental Table 3: Median expression of each surface marker on each cell population.

|             |             | CD117 Median |              |       |       |         |                   |              |                   |                  |               |            |                |             |                  |               |                   |           |               |              |         |          |       |           |           |              |                |
|-------------|-------------|--------------|--------------|-------|-------|---------|-------------------|--------------|-------------------|------------------|---------------|------------|----------------|-------------|------------------|---------------|-------------------|-----------|---------------|--------------|---------|----------|-------|-----------|-----------|--------------|----------------|
|             |             | Ungated      | CD34-CD38low | HSCs  | MPP   | CMP/GMP | Myelo/Mono-Blasts | ProMonocytes | CD14neg Monocytes | Mature Monocytes | ProMyelocytes | Myelocytes | MetaMyelocytes | MatureGrans | ProTryptroblasts | Erythroblasts | LateErythroblasts | PreBCells | Mature Bcells | Plasma Cells | T cells | NK cells | pDCs  | Basophils | Platelets | CD8+ T cells | CD8neg T cells |
| AML/RAEB-T  | Run1_MDS17  | 0.33         | 7.38         | 7.9   | 7.01  | 13.81   | 4.64              | -0.04        | -0.01             | -0.02            | -0.19         | -0.03      | -0.02          | 0.22        | 0.27             | -0.17         | -0.16             | 0.78      | -0.15         | -0.07        | -0.3    | -0.27    | 0.6   | -0.56     | -0.11     | -0.29        | -0.32          |
|             | Run2_MDS15* | 0.09         | 13.41        | 11.24 | 10.61 | 21.21   | 3.17              | -0.07        | -0.09             | -0.04            | 0.04          | -0.17      | -0.17          | 12.6        | 0.31             | 0.73          | -0.04             | -0.06     | -0.11         | -0.13        | -0.28   | -0.09    | -0.15 | -0.14     | 0.21      | -0.29        | -0.28          |
|             | Run2_MDS4   | -0.13        | 8.87         | 6.72  | 3.65  | -0.32   | 0.63              | -0.1         | -0.09             | 0.02             | -0.13         | -0.23      | -0.22          | -0.18       | 0.24             | -0.07         | -0.21             | -0.06     | -0.11         | -0.13        | -0.28   | -0.09    | -0.15 | -0.14     | 0.21      | -0.29        | -0.28          |
| Higher Risk | Run1_MDS21  | -0.03        | 7.33         | 8.03  | 7.07  | 8.69    | 7.69              | 0.88         | -0.1              | 0.16             | -0.27         | -0.23      | -0.19          | 0.06        | -0.01            | 0.13          | 0.32              | -0.28     | -0.17         | -0.04        | -0.3    | -0.1     | 0.68  | 0.35      | 0.15      | -0.27        | -0.31          |
|             | Run1_MDS3   | -0.09        | 5.46         | 6.01  | 5.18  | 7.06    | 6.24              | 1.5          | 0.01              | 1.08             | -0.24         | -0.2       | -0.14          | 0.28        | -0.05            | -0.01         | 0.09              | -0.25     | -0.13         | 0.73         | -0.31   | -0.2     | 0.83  | -0.01     | -0.02     | -0.3         | -0.31          |
|             | Run2_MDS13  | -0.06        | 3.43         | 3.78  | 3.22  | 6.37    | 5.09              | -0.04        | -0.01             | 0.17             | -0.21         | -0.17      | -0.14          | -0.07       | 0.61             | -0.19         | -0.21             | -0.24     | -0.3          | -0.03        | -0.28   | -0.16    | 0.18  | 0.24      | -0.09     | -0.26        | -0.29          |
|             | Run2_MDS16  | -0.2         | 5.17         | 5.29  | 4.23  | 4.36    | 0.3               | -0.17        | -0.09             | -0.08            | -0.21         | -0.28      | -0.25          | -0.22       | 2.1              | -0.19         | -0.16             | -0.23     | -0.25         | -0.02        | -0.28   | -0.19    | 0.15  | -0.17     | -0.01     | -0.26        | -0.28          |
|             | Run2_MDS1   | -0.19        | 8.76         | 5.98  | 9.66  | 15.14   | 3.46              | -0.1         | -0.22             | -0.11            | -0.21         | -0.35      | -0.24          | 1.06        | -0.1             | -0.23         | -0.14             | -0.24     | -0.03         | -0.29        | -0.22   | -0.22    | 0.06  | -0.12     | -0.3      | -0.29        | -0.29          |
|             | Run2_MDS21  | -0.07        | 7.66         | 8.2   | 7.58  | 9.66    | 7.45              | -0.06        | -0.1              | -0.02            | -0.21         | -0.2       | -0.17          | -0.13       | 0.76             | -0.19         | -0.23             | -0.26     | -0.26         | -0.1         | -0.29   | -0.28    | 7.24  | 0.25      | -0.01     | -0.27        | -0.3           |
|             | Run2_MDS26* | -0.25        | 9.73         | 10.03 | 8.76  | 19.84   | 4.22              | 0.07         | -0.16             | -0.06            | -0.3          | -0.32      | -0.27          | -0.22       | 2.82             | -0.22         | -0.27             | -0.08     | -0.28         | -0.07        | -0.3    | -0.19    | 0.16  | 0.37      | -0.27     | -0.3         | -0.3           |
| Lower Risk  | Run2_MDS27  | -0.12        | 2.42         | 2.66  | 1.96  | 2.06    | 0.9               | 0.12         | -0.12             | -0.12            | -0.16         | -0.23      | -0.21          | -0.17       | 0.4              | -0.22         | -0.25             | -0.02     | -0.22         | 0.12         | -0.27   | -0.24    | -0.08 | -0.03     | 0.43      | -0.27        | -0.27          |
|             | Run2_MDS2   | -0.1         | 2.86         | 4.06  | 2.27  | 3.82    | 2.07              | -0.18        | -0.22             | 0                | 0.46          | -0.24      | -0.17          | -0.12       | 1.69             | 0.31          | 0                 | -0.13     | 0.2           | -0.66        | -0.28   | -0.23    | 0.57  | -0.07     | -0.1      | -0.18        | -0.28          |
|             | Run2_MDS3   | -0.07        | 5.73         | 6.46  | 5.5   | 8.32    | 6.54              | -0.09        | -0.14             | -0.14            | -0.18         | -0.09      | -0.06          | 0.09        | 1.8              | -0.19         | -0.26             | -0.26     | -0.13         | -0.02        | -0.29   | -0.14    | 0.35  | 0.15      | -0.06     | -0.28        | -0.29          |
| ICUS        | Run1_MDS23  | -0.16        | 5.41         | 6.88  | 5.18  | 10.03   | 0.36              | -0.05        | -0.01             | 0.09             | -0.17         | -0.21      | -0.18          | -0.16       | 0.33             | 0.01          | 0.06              | -0.11     | -0.23         | -0.09        | -0.3    | -0.25    | -0.05 | -0.18     | -0.04     | -0.29        | -0.3           |
|             | Run1_MDS25  | -0.2         | 3.34         | 3.31  | 4.86  | 4.9     | -0.05             | -0.17        | -0.14             | -0.28            | -0.28         | -0.25      | -0.2           | 0           | 0.18             | 0.11          | -0.17             | -0.09     | 0.33          | -0.3         | -0.15   | 0.1      | -0.15 | -0.12     | -0.3      | -0.3         |                |
|             | Run1_MDS5   | -0.05        | 2.03         | 1.4   | 1.92  | 1.4     | 0.71              | -0.02        | 0.34              | 0.4              | 0.03          | -0.17      | -0.06          | 0.02        | 0.4              | -0.02         | 0.07              | 0.15      | -0.28         | 0.38         | -0.26   | -0.09    | 0.49  | -0.13     | -0.17     | -0.22        | -0.27          |
|             | Run1_MDS6   | -0.15        | 5.5          | 4.1   | 1.79  | 4.67    | 1.73              | 0.14         | 0.12              | 0.13             | -0.14         | -0.18      | -0.16          | -0.16       | 0.99             | -0.11         | 0.07              | 0.2       | -0.25         | 0.58         | -0.39   | -0.19    | 0.44  | 0.35      | 0.28      | -0.27        | -0.3           |
|             | Run1_MDS8   | -0.2         | 5.97         | 6.73  | 3.45  | 5.4     | 0.96              | -0.02        | -0.07             | -0.09            | -0.23         | -0.26      | -0.24          | -0.2        | 0.83             | 0.05          | 0.04              | -0.22     | -0.28         | -0.04        | -0.34   | -0.15    | 0.38  | -0.07     | 0.03      | -0.31        | -0.35          |
|             | Run1_MDS9   | -0.18        | 4.13         | 4.79  | 2.8   | 4.53    | 1.85              | -0.04        | -0.02             | -0.06            | -0.22         | -0.24      | -0.21          | -0.16       | 0.32             | 0.01          | 0.02              | -0.1      | -0.27         | -0.15        | -0.33   | -0.2     | 0.04  | 0.09      | -0.15     | -0.3         | -0.34          |
|             | Run2_MDS12  | -0.18        | 12.03        | 16.05 | 11.57 | 28.74   | 0.31              | -0.12        | -0.09             | -0.05            | -0.2          | -0.25      | -0.18          | -0.15       | 0.49             | -0.19         | -0.19             | -0.13     | -0.19         | -0.04        | -0.31   | -0.18    | 0.15  | -0.09     | -0.05     | -0.29        | -0.32          |
|             | Run2_MDS14  | -0.18        | 3.19         | 2.4   | 0.88  | 1.36    | -0.15             | -0.13        | -0.07             | -0.05            | -0.16         | -0.23      | -0.17          | -0.19       | 0.22             | -0.18         | -0.09             | -0.25     | -0.21         | 0.17         | -0.26   | -0.15    | 0.16  | -0.19     | -0.18     | -0.25        | -0.26          |
|             | Run2_MDS19  | -0.22        | 4.49         | 4.34  | 4.01  | 7.5     | 0.51              | -0.14        | -0.18             | -0.13            | -0.23         | -0.25      | -0.22          | -0.21       | 0.3              | -0.19         | -0.28             | -0.19     | -0.24         | -0.35        | -0.28   | -0.18    | 0.06  | -0.23     | 0         | -0.3         | -0.27          |
|             | Run2_MDS20  | -0.19        | 1.96         | 2.36  | 1.96  | 5.11    | 0.08              | -0.03        | -0.05             | 0.01             | -0.18         | -0.21      | -0.2           | -0.16       | 1.83             | -0.11         | -0.14             | -0.17     | -0.13         | 0.43         | -0.29   | -0.18    | -0.12 | 0         | -0.02     | -0.28        | -0.3           |
| Run2_MDS28* | -0.07       | 7.63         | 8.54         | 7.31  | 10.38 | 0.82    | 0.12              | 0.06         | 0.22              | -0.11            | -0.15         | -0.08      | -0.05          | 10.87       | -0.23            | -0.09         | -0.06             | -0.19     | 0.01          | -0.29        | -0.21   | 0.24     | 0.09  | 0         | -0.29     | -0.29        |                |
| Run2_MDS5   | -0.1        | 3.14         | 0.69         | 0.9   | 2.03  | 0.55    | -0.09             | 0.14         | 0.24              | -0.18            | -0.2          | -0.09      | -0.05          | 0.48        | -0.08            | -0.01         | -0.06             | -0.22     | 0.43          | -0.27        | -0.1    | -0.1     | -0.08 | -0.17     | -0.27     | -0.26        |                |
| Normal      | Run1_ICUS18 | -0.17        | 3.52         | 4.09  | 3.83  | 3.43    | 0.15              | -0.06        | -0.05             | -0.06            | -0.18         | -0.18      | -0.16          | -0.16       | 0.23             | -0.08         | -0.02             | -0.16     | -0.24         | 0.02         | -0.29   | -0.21    | -0.02 | -0.17     | 0.19      | -0.26        | -0.3           |
|             | Run1_ICUS22 | -0.16        | 2.68         | 3.16  | 1.99  | 3.25    | 0.38              | -0.03        | -0.04             | 0.02             | -0.23         | -0.21      | -0.18          | -0.16       | 0.13             | 0.03          | -0.06             | -0.18     | -0.19         | -0.2         | -0.27   | -0.16    | -0.03 | -0.05     | -0.15     | -0.27        | -0.26          |
|             | Run1_ICUS24 | -0.2         | 4.07         | 3.93  | 4.04  | 4.25    | 0.56              | -0.13        | -0.16             | -0.13            | -0.21         | -0.24      | -0.21          | -0.2        | 0.29             | -0.13         | -0.03             | -0.21     | -0.2          | -0.1         | -0.3    | -0.23    | 0.14  | -0.21     | 0.12      | -0.31        | -0.28          |
| Normal      | Run1_NI-1   | -0.2         | 3.3          | 3.34  | 2.09  | 1.22    | 0.2               | -0.07        | -0.1              | -0.04            | -0.23         | -0.26      | -0.22          | -0.19       | 0.13             | -0.02         | -0.07             | -0.23     | -0.25         | 0            | -0.3    | -0.19    | 0.07  | 0.3       | 0.19      | -0.28        | -0.31          |
|             | Run1_NI-3   | -0.17        | 3.1          | 2.95  | 3.13  | 3.16    | 0.76              | 0.32         | 0.35              | 0.08             | -0.18         | -0.22      | -0.17          | -0.18       | 1.09             | -0.1          | -0.05             | -0.16     | -0.3          | -0.07        | -0.31   | -0.2     | -0.05 | -0.16     | -0.19     | -0.31        | -0.32          |
|             | Run1_NI-4   | -0.15        | 3.06         | 2.5   | 2.89  | 3.67    | 0.84              | 0.37         | 0.37              | 0.23             | -0.17         | -0.21      | -0.15          | -0.15       | 1.23             | -0.1          | -0.06             | -0.18     | -0.23         | -0.07        | -0.3    | -0.21    | -0.03 | -0.09     | -0.22     | -0.3         | -0.3           |
|             | Run1_NI-6   | -0.16        | 2.52         | 2.66  | 1.83  | 1.95    | 0.9               | 0.27         | 0.49              | 0.22             | -0.17         | -0.21      | -0.17          | -0.17       | 0.49             | -0.13         | -0.12             | -0.15     | -0.25         | 0.16         | -0.3    | -0.24    | 0     | -0.07     | -0.12     | -0.29        | -0.3           |
|             | Run2_NI-3   | -0.19        | 2.76         | 2.84  | 2.32  | 3.32    | 0.63              | -0.01        | 0.1               | -0.01            | -0.22         | -0.25      | -0.19          | -0.17       | 0.81             | -0.17         | -0.17             | -0.18     | -0.3          | -0.11        | -0.29   | -0.25    | -0.06 | -0.16     | -0.13     | -0.28        | -0.31          |
|             | Run2_NI-4   | -0.17        | 3.54         | 3.63  | 2.71  | 4.09    | 0.69              | 0.19         | 0.18              | 0.03             | -0.19         | -0.23      | -0.17          | -0.14       | 1.13             | -0.15         | -0.13             | -0.2      | -0.2          | 0.09         | -0.3    | -0.21    | -0.03 | -0.21     | -0.12     | -0.29        | -0.31          |
| Run2_NI-5   | -0.18       | 2.73         | 3.82         | 1.74  | 2.05  | 0.42    | 0.25              | 0.27         | 0.13              | -0.2             | -0.24         | -0.17      | -0.16          | 0.53        | -0.2             | -0.14         | -0.24             | -0.29     | -0.03         | -0.3         | -0.24   | -0.14    | -0.17 | -0.11     | -0.29     | -0.31        |                |
| Run2_NI-6   | -0.18       | 2.01         | 2.79         | 1.44  | 2.17  | 0.83    | 0.23              | 0.27         | 0.15              | -0.21            | -0.23         | -0.19      | -0.19          | 0.42        | -0.18            | -0.21         | -0.16             | -0.22     | 0.13          | -0.29        | -0.24   | -0.07    | -0.1  | -0.17     | -0.27     | -0.29        |                |

Supplemental Table 3: Median expression of each surface marker on each cell population.

|             |             | CD56 Median |              |      |      |         |                   |              |                   |                  |               |            |                |             |                   |               |                   |           |               |              |         |          |      |           |           |              |                |
|-------------|-------------|-------------|--------------|------|------|---------|-------------------|--------------|-------------------|------------------|---------------|------------|----------------|-------------|-------------------|---------------|-------------------|-----------|---------------|--------------|---------|----------|------|-----------|-----------|--------------|----------------|
|             |             | Ungated     | CD34-CD38low | HSCs | MPP  | CMP/GMP | Myelo/Mono-Blasts | ProMonocytes | CD14neg Monocytes | Mature Monocytes | ProMyelocytes | Myelocytes | MetaMyelocytes | MatureGrans | ProTryptroblast s | Erythroblasts | LateErythroblasts | PreBcells | Mature Bcells | Plasma Cells | T cells | NK cells | pDCs | Basophils | Platelets | CD8+ T cells | CD8neg T cells |
| AML/RAEB-T  | Run1_MDS17  | 1.79        | 2.35         | 2.43 | 2.28 | 3.11    | 2.33              | 3.02         | 3.35              | 3.9              | 1.62          | 1.76       | 1.45           | 1.81        | 1.23              | 0.68          | 1.25              | 2.16      | 2.02          | 4.1          | 2.41    | 18.78    | 2.26 | 1.43      | 2.77      | 3.43         | 1.31           |
|             | Run2_MDS15* | 1.7         | 5.95         | 2.51 | 2.12 | 1.11    | 2.64              | 1.94         | 0.6               | 0.77             | 6.3           | 3.36       | 1.17           | 0.55        | 2.19              | 1.39          | 1.87              | 1.06      | 0.71          | 2.87         | 1.56    | 45.82    | 1.18 | 0.83      | 0.9       | 3.44         | 0.59           |
|             | Run2_MDS4   | 1.02        | 2.8          | 2.28 | 2.08 | 1.35    | 1.89              | 1.28         | 1.28              | 1.72             | 1.14          | 0.72       | 0.72           | 0.89        | 0.42              | 0.03          | 0.57              | 1.67      | 1.88          | 2.09         | 1.11    | 13.81    | 1    | 0.5       | 1.4       | 2.2          | 0.44           |
| Higher Risk | Run1_MDS21  | 1.22        | 2.01         | 2.24 | 1.93 | 2.27    | 2.3               | 2.71         | 2.26              | 2.49             | 0.35          | 0.69       | 1.01           | 1.54        | 0.51              | 0.75          | 2.27              | 1.26      | 1.44          | 3.38         | 1.51    | 24.86    | 3.16 | 0.34      | 1.67      | 4.16         | 0.88           |
|             | Run1_MDS3   | 1.25        | 2.37         | 2.12 | 2.29 | 2.7     | 2.7               | 2.85         | 3.87              | 4.94             | 0.53          | 0.86       | 1.17           | 1.91        | 1.02              | 1.13          | 1.11              | 1.93      | 1.17          | 3.15         | 1.49    | 21.94    | 3.04 | 0.7       | 0.9       | 4.47         | 0.84           |
|             | Run2_MDS13  | 1.75        | 2.8          | 2.86 | 2.67 | 3.2     | 3.43              | 3.38         | 4.55              | 4.38             | 1.16          | 1.43       | 1.16           | 1.39        | 3.22              | 0.41          | 0.98              | 1.19      | 1.28          | 4.02         | 1.62    | 21.49    | 1.78 | 0.51      | 0.59      | 3.78         | 0.52           |
|             | Run2_MDS16  | 0.88        | 1.54         | 1.52 | 1.37 | 1.75    | 1.94              | 1.79         | 1.68              | 1.81             | 0.81          | 0.62       | 0.7            | 0.84        | 1.08              | -0.14         | 1.07              | 1.23      | 0.6           | 3.72         | 0.78    | 20.29    | 2.14 | 0.32      | 2.16      | 2.37         | 0.55           |
|             | Run2_MDS1   | 1.03        | 1.95         | 1.68 | 1.53 | 1.65    | 1.47              | 3.11         | 4.8               | 4.38             | 0.89          | 0.58       | 0.66           | 0.68        | 0.5               | 0.08          | 0.48              | 2.06      | 0.95          | 3.22         | 0.51    | 34.94    | 0.86 | 0.26      | 1.14      | 1.92         | 0.32           |
|             | Run2_MDS21  | 1.09        | 1.77         | 1.91 | 1.69 | 2.09    | 2.14              | 2.27         | 2.02              | 2.08             | 0.37          | 0.6        | 0.85           | 1.14        | 1.42              | 0.28          | 0.73              | 1         | 1.14          | 2.85         | 1.32    | 17.23    | 0.84 | 0.45      | 1.15      | 3.38         | 0.81           |
|             | Run2_MDS26* | 0.75        | 2.38         | 2.55 | 2.28 | 3.08    | 2.59              | 2.57         | 2.8               | 2.22             | 0.71          | 0.96       | 0.74           | 0.71        | 1.69              | 0.25          | 0.48              | 1.15      | 0.83          | 3.03         | 1.13    | 9.85     | 1.61 | 0.39      | 0.08      | 2.13         | 0.72           |
|             | Run2_MDS27  | 0.97        | 2.26         | 2.31 | 2.03 | 2.51    | 2.23              | 1.86         | 1.31              | 0.96             | 0.91          | 0.83       | 0.8            | 1.14        | 1.57              | -0.25         | -0.08             | 2.12      | 0.57          | 3.88         | 1.23    | 12.7     | 0.88 | 0.21      | 2.34      | 2.14         | 0.52           |
|             | Run2_MDS2   | 0.7         | 1.09         | 2.18 | 0.79 | 1.18    | 0.84              | 0.73         | 0.66              | 1.68             | 2.03          | 0.82       | 0.62           | 0.74        | 3.44              | 1.16          | 0.63              | 0.82      | 0.95          | 0.27         | 0.4     | 9.92     | 0.31 | 0.14      | 0.66      | 2.25         | 0.34           |
|             | Run2_MDS3   | 1.19        | 2.05         | 2.08 | 1.99 | 2.44    | 2.54              | 2.4          | 3.01              | 3.75             | 0.74          | 1.02       | 1.1            | 1.63        | 1.52              | 0.56          | 0.62              | 0.84      | 0.91          | 2.08         | 1.29    | 20.19    | 1.09 | 0.49      | 0.61      | 3.94         | 0.71           |
| Lower Risk  | Run1_MDS23  | 0.84        | 1.86         | 2.14 | 1.44 | 2.71    | 2.19              | 2.24         | 1.98              | 1.94             | 0.42          | 0.57       | 0.62           | 0.58        | 0.73              | 0.64          | 1.03              | 2.13      | 1.38          | 3.48         | 1.8     | 17.84    | 1.77 | 0.85      | 1.27      | 2.84         | 1.43           |
|             | Run1_MDS25  | 1.18        | 3.87         | 3.73 | 2.71 | 3.25    | 2.58              | 3.04         | 2.77              | 2.69             | 1.1           | 1.05       | 0.92           | 1.03        | 0.82              | 0.91          | 2.03              | 2.37      | 1.32          | 4.22         | 1.86    | 9.36     | 2.63 | 0.78      | 1.78      | 2.8          | 1.06           |
|             | Run1_MDS5   | 2.11        | 3.66         | 4.98 | 3.07 | 4.56    | 4.48              | 4.73         | 3.38              | 5.2              | 4.19          | 1.94       | 2.19           | 2.13        | 4.27              | 0.49          | 1.7               | 3.15      | 1.84          | 4.76         | 1.38    | 133.6    | 1.71 | 0.61      | 1.06      | 2.86         | 0.95           |
|             | Run1_MDS6   | 2.17        | 5.58         | 4.18 | 3.35 | 4.96    | 5.75              | 5.81         | 14.55             | 6.34             | 7.12          | 6.51       | 3.89           | 1.85        | 2.34              | -0.1          | 1.91              | 2.11      | 1.64          | 4.07         | 1.63    | 21.51    | 2.67 | 0.67      | 1.54      | 3.08         | 0.82           |
|             | Run1_MDS8   | 0.85        | 2.9          | 2.6  | 2.59 | 3.77    | 2.52              | 1.59         | 1.32              | 1.37             | 1.28          | 0.65       | 0.65           | 0.76        | 0.77              | 0.44          | 0.75              | 1.6       | 1.75          | 2.84         | 0.89    | 12.37    | 1.89 | 0.59      | 1.44      | 1.99         | 0.65           |
|             | Run1_MDS9   | 0.92        | 2.19         | 2.14 | 2.07 | 1.94    | 1.68              | 1.41         | 1.43              | 1.49             | 0.86          | 0.87       | 0.65           | 0.72        | 0.17              | -0.02         | 1.7               | 2.07      | 0.84          | 2.39         | 1.2     | 13.69    | 1.13 | 0.71      | 1.25      | 2.87         | 0.61           |
|             | Run2_MDS12  | 0.84        | 2.92         | 2.14 | 2.36 | 2.4     | 7.75              | 9.48         | 7.95              | 7.98             | 0.43          | 0.55       | 0.69           | 0.77        | 0.85              | 0             | 0.7               | 3.41      | 0.91          | 2.43         | 1.1     | 33.16    | 2.85 | 0.55      | 1.37      | 2.29         | 0.65           |
|             | Run2_MDS14  | 0.87        | 1.69         | 1.58 | 1.8  | 1.79    | 2.01              | 1.54         | 1.93              | 1.9              | 0.8           | 0.63       | 0.79           | 0.82        | 0.86              | -0.21         | 0.98              | 1.03      | 0.9           | 2.36         | 1.19    | 38.76    | 3.1  | 0.19      | 0.75      | 2.55         | 0.74           |
|             | Run2_MDS19  | 1.01        | 1.55         | 1.34 | 1.37 | 2.39    | 1.05              | 1.53         | 1.25              | 1.22             | 0.64          | 0.81       | 0.99           | 1.05        | 1.47              | -0.02         | 0.46              | 1.45      | 0.63          | 2.86         | 1.03    | 21.91    | 1.89 | 0.25      | 0.74      | 2.88         | 0.71           |
|             | Run2_MDS20  | 0.91        | 2.52         | 2.88 | 1.47 | 2.3     | 1.39              | 1.32         | 1.12              | 1.33             | 0.86          | 0.67       | 0.71           | 0.91        | 1.5               | 0.23          | 1.06              | 1.14      | 1.13          | 4.1          | 0.72    | 3.87     | 1.31 | 0.25      | 1.86      | 2.13         | 0.63           |
| Run2_MDS28* | 0.93        | 1.78        | 2.15         | 1.63 | 2.59 | 3.46    | 5.41              | 3.32         | 4.91              | 0.87             | 0.81          | 0.72       | 0.66           | 1.81        | 0.07              | 0.68          | 2.78              | 0.97      | 4.1           | 1.68         | 17.69   | 1.82     | 0.52 | 1.4       | 3.12      | 0.85         |                |
| Run2_MDS5   | 1.71        | 3.02        | 0.95         | 3.23 | 3.39 | 2.65    | 2.48              | 2.59         | 4.07              | 3.7              | 1.44          | 1.76       | 1.73           | 3.18        | 0.05              | 1.36          | 1.93              | 0.5       | 3.28          | 0.85         | 132.45  | 2.02     | 0.34 | 0.74      | 2.55      | 0.53         |                |
| ICUS        | Run1_ICUS18 | 1.16        | 1.99         | 2.04 | 1.99 | 3.02    | 2.1               | 2.01         | 1.94              | 1.75             | 0.88          | 0.91       | 0.9            | 0.96        | 0.57              | 0.59          | 1.22              | 2.17      | 0.88          | 1.93         | 1.12    | 11.81    | 2.07 | 0.56      | 1.96      | 3.2          | 0.85           |
|             | Run1_ICUS22 | 0.74        | 1.81         | 2.13 | 1.67 | 1.82    | 1.82              | 1.87         | 1.71              | 1.75             | 0.36          | 0.56       | 0.64           | 0.58        | 0.14              | 0.21          | 0.94              | 1.3       | 0.88          | 3.25         | 1.28    | 6.18     | 1.68 | 0.59      | 1.15      | 2.44         | 0.93           |
|             | Run1_ICUS24 | 0.94        | 2.3          | 2.3  | 2    | 2.76    | 2.67              | 2.16         | 2.04              | 2.16             | 0.55          | 0.73       | 0.73           | 0.74        | 0.29              | -0.02         | 1.08              | 1.52      | 1             | 3.11         | 1.86    | 8.32     | 1.64 | 0.75      | 1.47      | 2.72         | 1.27           |
| Normal      | Run1_NI-1   | 0.86        | 2.18         | 2.79 | 2.05 | 1.88    | 1.61              | 1.48         | 1.4               | 1.32             | 0.57          | 0.71       | 0.78           | 0.76        | 0.34              | 0.24          | 1.17              | 1.16      | 0.87          | 3.15         | 1.19    | 12.3     | 1.51 | 0.42      | 1.59      | 2.56         | 0.71           |
|             | Run1_NI-3   | 2.01        | 3.72         | 3.01 | 3.77 | 4.84    | 4.43              | 3.55         | 3.27              | 2.7              | 1.81          | 1.46       | 1.87           | 1.98        | 2.21              | 1.01          | 2.5               | 2.58      | 1.6           | 5.47         | 2.24    | 17.01    | 4.35 | 0.85      | 3.45      | 3.43         | 1.6            |
|             | Run1_NI-4   | 2.18        | 4.54         | 4.34 | 4.31 | 5.26    | 4.9               | 3.92         | 3.45              | 3.09             | 2.22          | 1.71       | 2.03           | 2.11        | 2.23              | 1.13          | 2.5               | 2.86      | 2.27          | 6.44         | 2.4     | 13.56    | 4.03 | 0.72      | 3.56      | 3.17         | 1.85           |
|             | Run1_NI-6   | 1.7         | 2.8          | 2.72 | 2.46 | 3.68    | 4.28              | 3.69         | 3.74              | 3.24             | 2.02          | 1.39       | 1.42           | 1.6         | 1.54              | 1.03          | 1.95              | 2.46      | 1.87          | 6.11         | 2.08    | 13.31    | 3.11 | 0.77      | 1.81      | 3.38         | 1.68           |
|             | Run2_NI-3   | 1.7         | 3.42         | 3.8  | 2.94 | 3.78    | 4.13              | 3.08         | 2.93              | 2.59             | 1.6           | 1.19       | 1.61           | 1.81        | 1.92              | 0.57          | 1.94              | 2.04      | 1             | 4.59         | 1.67    | 14.96    | 3.82 | 0.57      | 2.96      | 2.64         | 1.11           |
|             | Run2_NI-4   | 2.01        | 4.38         | 4.89 | 3.72 | 4.94    | 5.05              | 3.7          | 3.23              | 3.14             | 1.86          | 1.43       | 1.94           | 2.04        | 2.45              | 0.73          | 2.39              | 2.14      | 1.47          | 6.35         | 1.94    | 12.71    | 3.78 | 0.49      | 3.25      | 2.61         | 1.43           |
| Run2_NI-5   | 1.73        | 2.97        | 2.96         | 2.7  | 3.47 | 4.27    | 3.33              | 2.9          | 2.66              | 1.4              | 1.07          | 1.52       | 1.73           | 1.51        | 0.26              | 1.98          | 1.97              | 1.42      | 5.82          | 1.81         | 14.68   | 3.44     | 0.62 | 3.21      | 2.74      | 1.12         |                |
| Run2_NI-6   | 1.5         | 2.52        | 2.1          | 2.39 | 3.56 | 4.45    | 3.39              | 2.94         | 2.76              | 1.47             | 1.09          | 1.25       | 1.5            | 2.31        | 0.8               | 1.72          | 1.89              | 1.25      | 5.94          | 1.66         | 11.69   | 2.69     | 0.39 | 1.71      | 2.7       | 1.36         |                |

Supplemental Table 3: Median expression of each surface marker on each cell population.

|             |             | CD90 Median |              |      |       |         |                   |              |                   |                  |               |            |                |             |                  |               |                   |           |               |              |         |          |       |           |           |              |                |
|-------------|-------------|-------------|--------------|------|-------|---------|-------------------|--------------|-------------------|------------------|---------------|------------|----------------|-------------|------------------|---------------|-------------------|-----------|---------------|--------------|---------|----------|-------|-----------|-----------|--------------|----------------|
|             |             | Ungated     | CD34-CD38low | HSCs | MPP   | CMP/GMP | Myelo/Mono-Blasts | ProMonocytes | CD14neg Monocytes | Mature Monocytes | ProMyelocytes | Myelocytes | MetaMyelocytes | MatureGrans | ProErythroblasts | Erythroblasts | LateErythroblasts | PreBCells | Mature Bcells | Plasma Cells | T cells | NK cells | pDCs  | Basophils | Platelets | CD8+ T cells | CD8neg T cells |
| AML/RAEB-T  | Run1_MDS17  | -0.12       | 0.55         | 4.15 | 0.32  | 0.72    | -0.06             | -0.14        | -0.02             | 0.06             | -0.3          | 0.24       | 0.05           | 0.16        | -0.24            | -0.34         | -0.22             | -0.08     | -0.41         | 0.42         | -0.44   | -0.27    | -0.12 | -0.85     | -0.11     | -0.43        | -0.45          |
|             | Run2_MDS15* | -0.2        | 2.02         | 4.58 | 0.91  | 0.69    | -0.03             | -0.25        | -0.28             | -0.24            | -0.26         | -0.29      | -0.32          | -0.34       | 0.12             | -0.21         | -0.05             | -0.21     | -0.4          | -0.12        | -0.39   | -0.11    | 0.33  | -0.27     | 0.21      | -0.39        | -0.38          |
|             | Run2_MDS4   | -0.33       | 1.25         | 5.12 | 0.47  | 1.43    | -0.29             | -0.26        | -0.23             | -0.38            | -0.38         | -0.37      | -0.33          | -0.38       | -0.38            | -0.28         | -0.14             | -0.2      | 0.07          | 0.07         | 0.07    | -0.41    | -0.26 | -0.25     | -0.31     | -0.29        | -0.41          |
| Higher Risk | Run1_MDS21  | -0.32       | 0.63         | 4.41 | 0.31  | 0.71    | 0.46              | 0.01         | -0.23             | -0.13            | -0.4          | -0.37      | -0.36          | -0.32       | -0.34            | -0.21         | -0.23             | -0.44     | -0.41         | 0.41         | -0.46   | -0.26    | -0.68 | -0.25     | -0.25     | -0.41        | -0.47          |
|             | Run1_MDS3   | -0.29       | 0.86         | 4.39 | 0.48  | 0.9     | 0.67              | 0.14         | -0.13             | -0.01            | -0.36         | -0.29      | -0.28          | -0.18       | -0.22            | -0.23         | -0.19             | -0.38     | -0.35         | 0.34         | -0.45   | -0.23    | -0.04 | -0.38     | -0.34     | -0.39        | -0.47          |
|             | Run2_MDS13  | -0.15       | 0.98         | 4.21 | 0.6   | 0.84    | 0.48              | -0.22        | -0.15             | -0.19            | -0.28         | -0.22      | -0.27          | -0.24       | -0.25            | -0.33         | -0.25             | -0.36     | -0.37         | -0.21        | -0.4    | -0.21    | -0.44 | -0.4      | -0.33     | -0.38        | -0.41          |
|             | Run2_MDS16  | -0.33       | 1.58         | 4.59 | 0.77  | 1.48    | -0.21             | -0.33        | -0.32             | -0.31            | -0.36         | -0.38      | -0.35          | -0.33       | 0.08             | -0.39         | -0.33             | -0.31     | -0.41         | -0.19        | -0.4    | -0.23    | -0.29 | -0.4      | -0.32     | -0.39        | -0.41          |
|             | Run2_MDS1   | -0.36       | 0.14         | 4.98 | 0.01  | 0.22    | -0.28             | -0.26        | -0.31             | -0.29            | -0.41         | -0.41      | -0.38          | -0.36       | -0.23            | -0.3          | -0.4              | -0.22     | -0.31         | 0.72         | -0.42   | -0.15    | -0.4  | -0.34     | -0.36     | -0.4         | -0.42          |
|             | Run2_MDS21  | -0.28       | 0.57         | 4.33 | 0.33  | 0.66    | 0.31              | -0.3         | -0.25             | -0.22            | -0.28         | -0.23      | -0.32          | -0.3        | -0.31            | -0.34         | -0.32             | -0.32     | -0.33         | 0.8          | -0.41   | -0.29    | -0.1  | -0.44     | -0.26     | -0.39        | -0.42          |
|             | Run2_MDS26* | -0.38       | 0.45         | 4.36 | 0.23  | 0.23    | -0.24             | -0.33        | -0.25             | -0.22            | -0.39         | -0.39      | -0.38          | -0.37       | -0.27            | -0.39         | -0.37             | -0.35     | -0.41         | 0.28         | -0.42   | -0.3     | -0.28 | -0.4      | -0.17     | -0.41        | -0.43          |
|             | Run2_MDS27  | -0.27       | 2.36         | 5.69 | 0.96  | 0.97    | 0.18              | -0.2         | -0.3              | -0.25            | -0.35         | -0.36      | -0.35          | -0.29       | -0.01            | -0.4          | -0.37             | -0.25     | -0.37         | 0.18         | -0.4    | -0.29    | -0.27 | -0.32     | 0.74      | -0.39        | -0.4           |
|             | Run2_MDS2   | -0.34       | 0.43         | 4.38 | 0.15  | 0.41    | -0.11             | -0.3         | -0.33             | -0.2             | -0.15         | -0.4       | -0.37          | -0.35       | 0.2              | -0.41         | -0.21             | -0.24     | -0.37         | -0.35        | -0.44   | -0.36    | -0.31 | -0.48     | -0.35     | -0.35        | -0.45          |
|             | Run2_MDS3   | -0.22       | 0.84         | 4.43 | 0.51  | 0.99    | 0.45              | -0.11        | -0.16             | -0.07            | -0.22         | -0.04      | -0.08          | 0.17        | -0.2             | -0.29         | -0.28             | -0.34     | -0.33         | 0.2          | -0.39   | -0.26    | -0.06 | -0.29     | -0.3      | -0.36        | -0.41          |
| Lower Risk  | Run1_MDS23  | -0.29       | 1.69         | 4.66 | 0.67  | 0.64    | -0.28             | -0.21        | -0.2              | -0.2             | -0.04         | -0.17      | -0.29          | -0.32       | -0.31            | -0.31         | -0.21             | -0.31     | -0.37         | 0.48         | -0.46   | -0.26    | -0.36 | -0.44     | -0.17     | -0.44        | -0.46          |
|             | Run1_MDS25  | -0.39       | 3.39         | 5.96 | -0.29 | 0.67    | -0.28             | -0.38        | -0.36             | -0.35            | -0.39         | -0.46      | -0.42          | -0.39       | -0.4             | -0.36         | -0.02             | -0.44     | -0.37         | 0            | -0.44   | -0.3     | -0.32 | -0.3      | -0.34     | -0.42        | -0.47          |
|             | Run1_MDS5   | -0.29       | 1.52         | 4.5  | 0.65  | 0.96    | -0.11             | -0.22        | -0.13             | 0.07             | -0.34         | -0.38      | -0.33          | -0.3        | -0.18            | -0.32         | -0.26             | -0.23     | -0.4          | -0.24        | -0.43   | 0.43     | -0.1  | -0.38     | -0.38     | -0.41        | -0.43          |
|             | Run1_MDS6   | -0.27       | 7.33         | 7.49 | 1.08  | 4.77    | 0.62              | -0.03        | 0.16              | 0.11             | -0.31         | -0.28      | -0.25          | -0.25       | 0.03             | -0.4          | 0.04              | -0.31     | -0.43         | 1.6          | -0.44   | -0.26    | -0.16 | -0.34     | 1.47      | -0.42        | -0.46          |
|             | Run1_MDS8   | -0.39       | 2.89         | 6.39 | 1.18  | 1.16    | -0.09             | -0.21        | -0.28             | -0.31            | -0.44         | -0.42      | -0.42          | -0.38       | -0.38            | -0.31         | -0.33             | -0.41     | -0.47         | -0.53        | -0.47   | -0.28    | 0.24  | -0.43     | -0.35     | -0.46        | -0.48          |
|             | Run1_MDS9   | -0.39       | 2.17         | 5.8  | 0.67  | 1.57    | 0.21              | -0.38        | -0.41             | -0.36            | -0.38         | -0.39      | -0.4           | -0.38       | -0.37            | -0.4          | -0.26             | -0.43     | -0.43         | -0.12        | -0.47   | -0.33    | -0.4  | -0.4      | -0.41     | -0.44        | -0.49          |
|             | Run2_MDS12  | -0.3        | 0.65         | 4.65 | 0.44  | 0.53    | -0.15             | -0.14        | -0.13             | -0.13            | -0.3          | -0.32      | -0.3           | -0.29       | -0.33            | -0.4          | -0.33             | -0.3      | -0.37         | 0.5          | -0.39   | -0.24    | -0.2  | -0.4      | -0.3      | -0.37        | -0.41          |
|             | Run2_MDS14  | -0.16       | 5.08         | 4.37 | 1.35  | 0.84    | -0.27             | -0.35        | -0.18             | -0.16            | -0.29         | -0.31      | -0.23          | -0.24       | -0.31            | -0.36         | -0.19             | -0.34     | -0.4          | 1.19         | -0.39   | -0.17    | -0.12 | -0.43     | -0.42     | -0.38        | -0.39          |
|             | Run2_MDS19  | -0.34       | 1.59         | 4.36 | 0.86  | 0.97    | -0.2              | -0.32        | -0.32             | -0.32            | -0.33         | -0.36      | -0.34          | -0.33       | -0.32            | -0.39         | -0.37             | -0.36     | -0.4          | 0.19         | -0.4    | -0.26    | -0.28 | -0.34     | -0.39     | -0.39        | -0.41          |
|             | Run2_MDS20  | -0.33       | 2.1          | 5.67 | 0.44  | 1.25    | -0.26             | -0.32        | -0.26             | -0.26            | -0.34         | -0.34      | -0.31          | -0.29       | -0.23            | -0.31         | -0.3              | -0.34     | -0.37         | 0            | -0.41   | -0.28    | -0.39 | -0.4      | -0.33     | -0.39        | -0.41          |
| Run2_MDS28* | -0.24       | 1.56        | 5.66         | 0.92 | 1.07  | -0.05   | -0.2              | -0.17        | -0.12             | -0.25            | -0.29         | -0.22      | -0.24          | -0.25       | -0.38            | -0.23         | -0.29             | -0.35     | -0.05         | -0.4         | -0.26   | -0.18    | -0.38 | -0.11     | -0.39     | -0.42        |                |
| Run2_MDS5   | -0.28       | 1.78        | 4.43         | 0.47 | 0.36  | -0.12   | -0.23             | -0.15        | 0                 | -0.28            | -0.35         | -0.31      | -0.28          | -0.12       | -0.38            | -0.28         | -0.12             | -0.39     | -0.23         | -0.4         | 0.23    | -0.33    | -0.39 | -0.36     | -0.42     | -0.4         |                |
| ICUS        | Run1_ICUS18 | -0.34       | 1.44         | 5.68 | 0.73  | 1.43    | -0.34             | -0.31        | -0.26             | -0.27            | -0.33         | -0.34      | -0.35          | -0.32       | -0.38            | -0.4          | -0.27             | -0.35     | -0.49         | -0.22        | -0.46   | -0.33    | -0.38 | -0.46     | -0.33     | -0.42        | -0.47          |
|             | Run1_ICUS22 | -0.37       | 1.5          | 5.28 | 0.6   | 0.57    | -0.28             | -0.34        | -0.33             | -0.3             | -0.34         | -0.38      | -0.38          | -0.37       | -0.34            | -0.34         | -0.3              | -0.36     | -0.44         | -0.18        | -0.45   | -0.39    | -0.34 | -0.41     | -0.44     | -0.43        | -0.46          |
|             | Run1_ICUS24 | -0.36       | 2.28         | 5.48 | 1.03  | 0.6     | -0.2              | -0.29        | -0.32             | -0.3             | -0.37         | -0.36      | -0.35          | -0.35       | -0.32            | -0.35         | -0.31             | -0.39     | -0.43         | 1.1          | -0.46   | -0.35    | -0.26 | -0.38     | -0.35     | -0.45        | -0.46          |
| Normal      | Run1_NI-1   | -0.38       | 2.04         | 4.02 | 1.11  | 0.33    | -0.26             | -0.28        | -0.27             | -0.26            | -0.39         | -0.39      | -0.37          | -0.37       | -0.28            | -0.25         | -0.3              | -0.38     | -0.45         | 1.92         | -0.47   | -0.34    | -0.35 | -0.43     | -0.33     | -0.45        | -0.47          |
|             | Run1_NI-3   | -0.27       | 2.18         | 4.97 | 0.98  | 1.23    | -0.02             | 0.22         | 0.51              | 0.1              | -0.34         | -0.32      | -0.24          | -0.23       | -0.28            | -0.38         | -0.14             | -0.36     | -0.47         | 0.19         | -0.45   | -0.25    | -0.31 | -0.43     | -0.35     | -0.44        | -0.46          |
|             | Run1_NI-4   | -0.24       | 2.1          | 4.92 | 1.24  | 1.16    | 0.03              | 0.48         | 0.73              | 0.27             | -0.3          | -0.31      | -0.23          | -0.2        | -0.24            | -0.35         | -0.14             | -0.32     | -0.44         | 0.54         | -0.43   | -0.29    | -0.25 | -0.39     | -0.33     | -0.43        | -0.44          |
|             | Run1_NI-5   | -0.25       | 1.96         | 4.89 | 0.79  | 0.74    | 0.1               | 0.37         | 0.53              | 0.24             | -0.31         | -0.28      | -0.23          | -0.22       | -0.27            | -0.37         | -0.17             | -0.34     | -0.45         | 0.96         | -0.44   | -0.32    | -0.28 | -0.39     | -0.27     | -0.43        | -0.45          |
|             | Run2_NI-3   | -0.24       | 1.9          | 4.68 | 0.95  | 0.84    | -0.06             | 0.01         | 0.27              | -0.03            | -0.38         | -0.19      | -0.16          | -0.16       | -0.31            | -0.35         | -0.16             | -0.3      | -0.4          | -0.27        | -0.41   | -0.29    | -0.31 | -0.41     | -0.32     | -0.4         | -0.41          |
|             | Run2_NI-4   | -0.19       | 1.96         | 4.98 | 0.83  | 0.99    | -0.04             | 0.35         | 0.49              | 0.2              | -0.28         | -0.27      | -0.15          | -0.09       | -0.23            | -0.33         | -0.09             | -0.29     | -0.4          | 0.37         | -0.39   | -0.27    | -0.23 | -0.37     | -0.33     | -0.39        | -0.39          |
| Run2_NI-5   | -0.2        | 1.85        | 5.07         | 0.74 | 0.8   | -0.08   | 0.19              | 0.48         | 0.19              | -0.32            | -0.28         | -0.15      | -0.06          | -0.26       | -0.35            | -0.12         | -0.3              | -0.39     | 0.44          | -0.41        | -0.27   | -0.29    | -0.42 | -0.3      | -0.4      | -0.42        |                |
| Run2_NI-6   | -0.25       | 1.65        | 5.05         | 0.88 | 0.8   | -0.04   | 0.17              | 0.28         | 0.17              | -0.3             | -0.29         | -0.24      | -0.21          | -0.25       | -0.34            | -0.27         | -0.34             | -0.4      | 0.73          | -0.4         | -0.3    | -0.32    | -0.36 | -0.27     | -0.38     | -0.41        |                |

Supplemental Table 3: Median expression of each surface marker on each cell population.

|             |             | CD33 Median |              |       |       |         |                   |              |                   |                  |               |            |                |             |                  |               |                   |           |               |              |         |          |       |           |           |              |                |       |
|-------------|-------------|-------------|--------------|-------|-------|---------|-------------------|--------------|-------------------|------------------|---------------|------------|----------------|-------------|------------------|---------------|-------------------|-----------|---------------|--------------|---------|----------|-------|-----------|-----------|--------------|----------------|-------|
|             |             | Ungated     | CD34-CD38low | HSCs  | MPP   | CMP/GMP | Myelo/Mono-Blasts | ProMonocytes | CD14neg Monocytes | Mature Monocytes | ProMyelocytes | Myelocytes | MetaMyelocytes | MatureGrans | ProErythroblasts | Erythroblasts | LateErythroblasts | PreBCells | Mature Bcells | Plasma Cells | T cells | NK cells | pDCs  | Basophils | Platelets | CD8+ T cells | CD8neg T cells |       |
| AML/RAEB-T  | Run1_MDS17  | 0.95        | -0.08        | -0.06 | -0.16 | 0.32    | -0.1              | 13.79        | 32.58             | 40.96            | 2.92          | 4.54       | 6.59           | 7.59        | -0.39            | -0.44         | -0.23             | 0.66      | -0.31         | -0.44        | -0.44   | -0.37    | 2.22  | 12.15     | -0.26     | -0.44        | -0.43          |       |
|             | Run2_MDS15* | 12.74       | 9.19         | 1.67  | 1.45  | 1.61    | 10.57             | 17.17        | 38.24             | 51.85            | 6.31          | 7.5        | 10.82          | 10.06       | 6.68             | 6.51          | 15.05             | 24.08     | -0.21         | 0.03         | -0.44   | -0.3     | 12.99 | 13.78     | 1.32      | -0.39        | -0.39          |       |
|             | Run2_MDS4   | 3.96        | 7.75         | 1.48  | 1.53  | 0.06    | 22.5              | 55.32        | 70.77             | 69.28            | 5.79          | 5.56       | 6.27           | 7.36        | -0.23            | -0.35         | -0.21             | 0.47      | 0.46          | -0.29        | -0.39   | -0.25    | 2.05  | 7.88      | 0.04      | -0.39        | -0.4           |       |
| Higher Risk | Run1_MDS21  | 0.22        | 0.66         | 0.56  | 0.35  | 0.81    | 1.24              | 8.38         | 51.54             | 48.47            | 0.7           | 2.38       | 5.51           | 7.19        | -0.35            | -0.23         | 0.48              | -0.4      | -0.39         | -0.26        | -0.46   | -0.31    | 3.57  | 15.04     | -0.35     | -0.44        | -0.46          |       |
|             | Run1_MDS3   | 0.47        | 1.83         | 0.64  | 0.73  | 1.17    | 2.36              | 6.1          | 40.93             | 49.38            | 0.9           | 2.22       | 5.44           | 6.89        | -0.29            | -0.25         | 0.28              | -0.36     | -0.29         | 0.4          | -0.44   | -0.27    | 4.07  | 19.02     | -0.33     | -0.43        | -0.45          |       |
|             | Run2_MDS13  | 0.98        | 0.69         | 0.52  | 0.36  | 0.79    | 1.6               | 25.61        | 45.99             | 50.31            | 2.35          | 3.98       | 6.34           | 6.53        | -0.19            | -0.29         | -0.21             | -0.32     | -0.32         | -0.25        | -0.41   | -0.38    | 8.99  | 11.97     | -0.21     | -0.39        | -0.41          |       |
|             | Run2_MDS16  | 1.98        | 2.72         | 1     | 1.07  | 1.15    | 11.78             | 29.49        | 53.1              | 55.89            | 2.01          | 3.23       | 3.65           | 4.46        | 1.22             | -0.37         | 0.9               | -0.18     | -0.34         | -0.3         | -0.41   | -0.35    | 2.96  | 7.17      | -0.29     | -0.41        | -0.41          |       |
|             | Run2_MDS1   | -0.15       | -0.01        | -0.07 | -0.2  | -0.1    | 0.28              | 2.95         | 7.87              | 11.67            | -0.2          | -0.28      | -0.06          | 0.17        | -0.39            | -0.4          | -0.32             | -0.07     | -0.28         | -0.24        | -0.41   | -0.29    | 0.86  | 0.94      | -0.33     | -0.4         | -0.41          |       |
|             | Run2_MDS21  | 0.14        | 0.42         | 0.38  | 0.19  | 0.73    | 1.04              | 0.73         | 17.36             | 49.95            | 51.68         | 0.97       | 2.35           | 5.47        | 6.26             | -0.32         | -0.35             | -0.32     | -0.3          | -0.34        | -0.21   | -0.41    | -0.4  | 6.64      | 14.1      | -0.3         | -0.41          | -0.41 |
|             | Run2_MDS26* | 0.37        | 0.7          | 0.57  | 0.42  | 0.96    | 0.55              | 4.31         | 25.26             | 33.01            | 0             | 0.36       | 1.19           | 1.55        | -0.12            | -0.4          | -0.38             | -0.09     | -0.37         | -0.63        | -0.4    | -0.39    | 1.85  | 4.19      | 0.4       | -0.4         | -0.41          |       |
|             | Run2_MDS27  | -0.16       | 0.51         | 0.31  | 0.3   | 0.97    | 1.14              | 4.65         | 4.09              | 5.12             | 0.14          | 0.54       | 0.49           | 0.51        | 0.44             | -0.41         | -0.35             | -0.28     | -0.27         | -0.19        | -0.4    | -0.35    | 1.98  | 2.96      | -0.21     | -0.4         | -0.39          |       |
|             | Run2_MDS2   | 1.22        | 0.25         | 0.56  | 0     | 0.42    | 0.7               | 26.73        | 27.26             | 37.46            | 0.84          | 0.88       | 2.48           | 3.43        | 1.41             | 1.45          | -0.05             | -0.06     | 0.31          | -0.15        | -0.41   | -0.37    | 3.79  | 4.6       | -0.36     | -0.4         | -0.41          |       |
|             | Run2_MDS3   | 0.72        | 0.75         | 0.54  | 0.5   | 1.08    | 2.36              | 16.33        | 34.73             | 37.35            | 2.07          | 3.76       | 6.36           | 7.04        | -0.21            | -0.31         | -0.3              | -0.33     | -0.3          | -0.23        | -0.4    | -0.27    | 4.3   | 15.7      | -0.24     | -0.4         | -0.4           |       |
| Lower Risk  | Run1_MDS23  | 0.48        | -0.16        | -0.23 | -0.28 | 0.62    | 2.55              | 14.96        | 24.39             | 31.25            | -0.18         | 0.12       | 0.58           | 0.75        | -0.29            | -0.24         | 1.02              | 0.68      | -0.31         | -0.17        | -0.47   | -0.39    | 1.02  | 4         | -0.25     | -0.46        | -0.47          |       |
|             | Run1_MDS25  | 2.82        | 2.75         | -0.07 | 2.16  | 0.52    | 9.47              | 20.25        | 24.09             | 23.2             | 0.96          | 1.75       | 2.4            | 3.09        | -0.21            | 0.27          | 2.72              | 1.2       | -0.29         | -0.14        | -0.44   | -0.35    | 3.43  | 8.66      | -0.44     | -0.46        | -0.43          |       |
|             | Run1_MDS5   | 2.23        | 3.98         | 1.6   | 1.43  | 2.28    | 5.29              | 30.42        | 25.1              | 41.38            | 2.01          | 2.02       | 2.62           | 3.16        | 0.73             | -0.22         | 0.67              | 1.21      | -0.35         | -0.15        | -0.42   | -0.15    | 10.22 | 16.04     | -0.29     | -0.41        | -0.43          |       |
|             | Run1_MDS6   | 5.3         | 7.1          | 1.79  | 1.33  | 2.68    | 11.54             | 31.58        | 47.76             | 52.26            | 3.36          | 5.52       | 7.23           | 6.28        | 2.68             | -0.39         | 3.47              | 0.22      | -0.32         | -0.05        | -0.45   | -0.34    | 8.06  | 9.22      | -0.11     | -0.44        | -0.46          |       |
|             | Run1_MDS8   | 0.36        | 0.46         | 0.04  | 0.56  | 0.02    | 1.5               | 5.23         | 8.02              | 8.61             | 0.02          | 0.54       | 0.49           | 0.66        | -0.38            | -0.34         | -0.15             | -0.25     | -0.4          | -0.15        | -0.48   | -0.35    | 4.22  | 2.88      | -0.36     | -0.46        | -0.49          |       |
|             | Run1_MDS9   | -0.15       | 0.45         | 0.37  | 0.11  | 0.51    | 0.81              | 2.5          | 5.15              | 5.51             | -0.14         | 0.11       | -0.03          | 0.08        | -0.34            | -0.4          | -0.02             | -0.29     | -0.31         | -0.42        | -0.47   | -0.4     | 1.74  | 2.47      | -0.35     | -0.46        | -0.47          |       |
|             | Run2_MDS12  | 1.95        | 2.16         | 0.65  | 0.65  | 1.01    | 14.71             | 22.49        | 28.47             | 34.06            | 0.29          | 1.55       | 2.22           | 2.11        | -0.33            | -0.4          | 0                 | 11.03     | -0.25         | -0.38        | -0.41   | -0.37    | 2.33  | 6.61      | -0.01     | -0.41        | -0.41          |       |
|             | Run2_MDS14  | 1.97        | 1.28         | 0.42  | 1.28  | 0.78    | 6.72              | 14.57        | 20.87             | 27.09            | 0.89          | 1.68       | 2.42           | 2.26        | -0.27            | -0.36         | 2.17              | 0.2       | -0.32         | -0.28        | -0.4    | -0.27    | 2.52  | 4.04      | -0.41     | -0.41        | -0.4           |       |
|             | Run2_MDS19  | 1.79        | 0.79         | 1.18  | 0.35  | 1.39    | 14.59             | 28.38        | 32.84             | 37.73            | 0.97          | 1.93       | 2.27           | 2.24        | -0.33            | -0.36         | -0.22             | 0.25      | -0.34         | -0.37        | -0.41   | -0.33    | 2.43  | 5.62      | -0.39     | -0.39        | -0.41          |       |
|             | Run2_MDS20  | 1.33        | 0.65         | 0.65  | 0.41  | 1.63    | 10.04             | 21.19        | 33.91             | 33.52            | 0.65          | 1.69       | 2.32           | 2.7         | 0.27             | -0.25         | 1.81              | -0.15     | -0.18         | 0.09         | -0.41   | -0.28    | 4.04  | 4.31      | -0.32     | -0.4         | -0.41          |       |
| Run2_MDS28* | 2.7         | 0.8         | 0.24         | 0.56  | 0.9   | 11.27   | 21                | 28.03        | 40.2              | 0.61             | 1.34          | 2.57       | 3.32           | 0.08        | -0.32            | 2.12          | 6.28              | -0.31     | -0.2          | -0.4         | -0.36   | 15.82    | 8.16  | -0.24     | -0.41     | -0.4         |                |       |
| Run2_MDS5   | 1.82        | 5.4         | 0.26         | 0.95  | 1.69  | 4.73    | 22.83             | 22.27        | 42.33             | 1.6              | 1.43          | 1.99       | 2.54           | 0.12        | -0.19            | 1.05          | 0.33              | -0.35     | -0.22         | -0.38        | -0.17   | 11.61    | 13.98 | -0.26     | -0.37     | -0.38        |                |       |
| ICUS        | Run1_ICUS18 | 4.43        | 1.64         | 1.38  | 0.81  | 1.29    | 15.18             | 36.2         | 68.97             | 67.55            | 2.28          | 4.52       | 5.46           | 5.43        | -0.21            | -0.24         | 6.42              | -0.15     | -0.37         | -0.06        | -0.46   | -0.39    | 3.61  | 7.24      | -0.37     | -0.46        | -0.46          |       |
|             | Run1_ICUS22 | 2.39        | 1.09         | 0.75  | 0.59  | 1.18    | 8.06              | 17.19        | 29.93             | 33.1             | 0.48          | 1.51       | 2.37           | 2.75        | -0.31            | -0.25         | 2.85              | -0.1      | -0.31         | -0.34        | -0.45   | -0.37    | 5.12  | 5.67      | -0.41     | -0.45        | -0.45          |       |
|             | Run1_ICUS24 | 1.29        | 0.06         | -0.08 | -0.01 | 0.53    | 4.3               | 15.01        | 19.68             | 24.77            | 0.33          | 1.14       | 1.93           | 2.25        | -0.38            | -0.42         | 0.19              | -0.26     | -0.27         | -0.34        | -0.46   | -0.44    | 2.32  | 4.23      | -0.35     | -0.46        | -0.46          |       |
| Normal      | Run1_NI-1   | 5.66        | 1.68         | 0.95  | 1.12  | 0.76    | 12.87             | 40.24        | 66.9              | 90.29            | 2.09          | 4.3        | 6.52           | 7.56        | -0.26            | -0.26         | 6.39              | -0.26     | -0.34         | -0.09        | -0.45   | -0.39    | 3.41  | 9.19      | -0.34     | -0.45        | -0.46          |       |
|             | Run1_NI-3   | 1.33        | 1.46         | 1.19  | 0.72  | 1.4     | 9.78              | 19.63        | 26.26             | 32.35            | 0.91          | 1.76       | 1.78           | 1.57        | -0.15            | -0.27         | 2.03              | -0.13     | -0.37         | -0.15        | -0.46   | -0.34    | 2.43  | 4.58      | -0.38     | -0.46        | -0.47          |       |
|             | Run1_NI-4   | 1.44        | 1.33         | 0.5   | 0.73  | 1.54    | 8.82              | 21.22        | 27.35             | 32.85            | 0.89          | 1.76       | 1.79           | 1.62        | -0.04            | -0.14         | 2.15              | -0.16     | -0.32         | 0.47         | -0.46   | -0.36    | 2.81  | 5.52      | -0.31     | -0.46        | -0.45          |       |
|             | Run1_NI-6   | 2.43        | 1.38         | 0.79  | 0.84  | 1.04    | 11.38             | 37.04        | 51.06             | 59.79            | 1.28          | 2.8        | 3.35           | 3.01        | -0.2             | -0.31         | 3                 | -0.22     | -0.18         | -0.04        | -0.46   | -0.38    | 4.09  | 10.91     | -0.46     | -0.47        | -0.45          |       |
|             | Run2_NI-3   | 1.15        | 1.09         | 0.72  | 0.67  | 1.36    | 8.63              | 18.39        | 23.78             | 29.25            | 0.93          | 1.41       | 1.47           | 1.41        | -0.25            | -0.3          | 1.41              | -0.14     | -0.35         | -0.3         | -0.41   | -0.35    | 1.81  | 3.44      | -0.32     | -0.41        | -0.41          |       |
|             | Run2_NI-4   | 1.36        | 0.98         | 0.24  | 0.65  | 1.1     | 9.38              | 20.04        | 24.9              | 28.35            | 0.93          | 1.52       | 1.64           | 1.54        | -0.19            | -0.21         | 1.75              | -0.13     | -0.29         | 0.18         | -0.4    | -0.35    | 2.21  | 3.91      | -0.32     | -0.41        | -0.4           |       |
| Run2_NI-5   | 1.23        | 1.02        | 0.7          | 0.83  | 0.98  | 9.78    | 20.99             | 30.26        | 33.04             | 0.83             | 1.82          | 2          | 1.84           | -0.1        | -0.31            | 1.76          | -0.2              | -0.34     | -0.07         | -0.41        | -0.35   | 1.87     | 5.6   | -0.36     | -0.42     | -0.41        |                |       |
| Run2_NI-6   | 2.4         | 0.94        | 0.61         | 0.46  | 0.96  | 11.49   | 35.76             | 47.23        | 52.68             | 1.27             | 2.51          | 3.08       | 2.78           | -0.18       | -0.33            | 1.42          | -0.21             | -0.21     | -0.15         | -0.39        | -0.34   | 3.08     | 7.8   | -0.34     | -0.41     | -0.39        |                |       |

Supplemental Table 3: Median expression of each surface marker on each cell population.

CD64 Medians

|             | Ungated | CD34-CD38low | HSCs | MPP  | CMP/GMP | Myelo/Mono-Blasts | ProMonocytes | CD14neg Monocytes | Mature Monocytes | ProMyelocytes | Myelocytes | MetaMyelocytes | MatureGrans | ProTryptroblast | Erythroblasts | LateErythroblasts | PreBcells | Mature Bcells | Plasma Cells | T cells | NK cells | pDCs  | Basophils | Platelets | CD8+ T cells | CD8neg T cells |
|-------------|---------|--------------|------|------|---------|-------------------|--------------|-------------------|------------------|---------------|------------|----------------|-------------|-----------------|---------------|-------------------|-----------|---------------|--------------|---------|----------|-------|-----------|-----------|--------------|----------------|
| Run1_MDS17  | 1.53    | 0.37         | 0.46 | 0.28 | 0.59    | 0.34              | 26.2         | 60.94             | 82.28            | 1.79          | 9.88       | 12.86          | 13.37       | -0.16           | -0.29         | -0.07             | 1.37      | 2.86          | 0.84         | -0.24   | -0.22    | 2.65  | 1.75      | -0.06     | -0.26        | -0.19          |
| Run2_MDS15* | 3.6     | 2.16         | 1.32 | 0.93 | 0.73    | 2.8               | 11.82        | 6.91              | 18.89            | 3.66          | 3.34       | 2.45           | 1.59        | 2.04            | 1.93          | 3.65              | 5.72      | 3.02          | 2.1          | -0.19   | -0.09    | 3.33  | 0.28      | 0.54      | -0.17        | -0.2           |
| Run2_MDS4   | 10.55   | 3.11         | 2.41 | 1.79 | 1.97    | 13.5              | 99.7         | 152.64            | 152.41           | 29.96         | 26.6       | 30.03          | 55.57       | 0               | -0.17         | 0.25              | 2.85      | 3.07          | -0.14        | -0.13   | 0.02     | 1.92  | -0.19     | 0.43      | -0.12        | -0.14          |
| Run1_MDS21  | 0.7     | 1.63         | 1.63 | 1.49 | 1.76    | 1.58              | 8.11         | 139.72            | 97.78            | 1.36          | 7.1        | 4.02           | 4.11        | -0.21           | -0.11         | 1.02              | 1.21      | 2.97          | 0.23         | -0.3    | 0.11     | 2.47  | -0.05     | -0.21     | -0.28        | -0.31          |
| Run1_MDS3   | 0.8     | 1.12         | 0.91 | 1.14 | 1.38    | 1.23              | 5.97         | 160.45            | 165.91           | 1.59          | 6.53       | 3.95           | 5.05        | -0.16           | -0.02         | 1.14              | 1.47      | 3.24          | 0.67         | -0.28   | -0.04    | 3.13  | 0         | -0.22     | -0.28        | -0.27          |
| Run2_MDS13  | 1.12    | 2.26         | 2.39 | 2.07 | 2.36    | 2.32              | 61.09        | 170.55            | 167.68           | 1.74          | 9.44       | 3.85           | 3.28        | 0.23            | -0.21         | -0.13             | 0.95      | 2.39          | 1.35         | -0.27   | -0.24    | 3.85  | 0.22      | -0.13     | -0.22        | -0.29          |
| Run2_MDS16  | 1.1     | 1.61         | 1.69 | 1.3  | 1.51    | 5.34              | 45.53        | 124.06            | 97.85            | 39            | 35.25      | 6.29           | 1.81        | 1.08            | -0.28         | 0.69              | -0.07     | 2.2           | 0.29         | -0.28   | -0.23    | 2.81  | -0.26     | -0.15     | -0.3         | -0.28          |
| Run2_MDS1   | 1.05    | 2.74         | 2.25 | 2.03 | 2.5     | 3.3               | 48.6         | 176.54            | 168.85           | 4.27          | 2.29       | 2.35           | 2.19        | 0.37            | -0.12         | -0.11             | 0.89      | 1.95          | 0.35         | -0.25   | -0.21    | 1.45  | -0.04     | 0.06      | -0.22        | -0.26          |
| Run2_MDS21  | 0.67    | 1.93         | 2.06 | 1.78 | 2.19    | 1.98              | 44.7         | 127.47            | 98.74            | 1.42          | 8.28       | 4.63           | 3.7         | -0.11           | -0.27         | -0.24             | 1.02      | 2.52          | 0.26         | -0.28   | -0.25    | 3.23  | -0.18     | -0.19     | -0.25        | -0.3           |
| Run2_MDS26* | 0.72    | 1.52         | 1.62 | 1.34 | 1.83    | 0.83              | 2.95         | 25.92             | 58.39            | 2.48          | 2.83       | 1.36           | 1.26        | -0.07           | -0.3          | -0.31             | 0.37      | 1.91          | -0.51        | -0.39   | -0.25    | 2.26  | -0.31     | 2.06      | -0.29        | -0.39          |
| Run2_MDS27  | 1.16    | 2.67         | 2.87 | 2.28 | 3.01    | 3.17              | 69.32        | 120.54            | 99.76            | 29.17         | 44.93      | 16.03          | 6.04        | 1.89            | -0.25         | -0.21             | 0.15      | 2.91          | 0.39         | -0.21   | -0.21    | 3.45  | -0.28     | -0.26     | -0.22        | -0.19          |
| Run2_MDS2   | 10.02   | 2.66         | 4.74 | 2.09 | 2.76    | 2.75              | 294.6        | 352.81            | 415.89           | 9.22          | 12.21      | 27.16          | 30.06       | 3.67            | 6.46          | 1.08              | 1.62      | 4.82          | 2.76         | -0.21   | -0.24    | 6.57  | -0.03     | -0.09     | -0.16        | -0.22          |
| Run2_MDS3   | 0.95    | 1.97         | 1.78 | 1.82 | 2.24    | 2.19              | 44.69        | 131.15            | 127.95           | 2             | 9.09       | 5.54           | 4.5         | 0.21            | -0.17         | -0.19             | 1.14      | 2.58          | 0.38         | -0.26   | -0.21    | 7.37  | 0.01      | -0.13     | -0.25        | -0.27          |
| Run1_MDS23  | 13.41   | 2.63         | 1.88 | 2.78 | 3.62    | 8.59              | 83.09        | 154.04            | 183.27           | 17.97         | 20         | 14.22          | 13.82       | 0.5             | 0.74          | 14.56             | 5.33      | 3.14          | 0.57         | -0.25   | -0.16    | 3.65  | -0.22     | 0.96      | -0.15        | -0.27          |
| Run1_MDS25  | 2.93    | 2.29         | 1.2  | 1.57 | 2.76    | 12.09             | 76.53        | 94.62             | 87.47            | 14.67         | 15.66      | 2.35           | 2.96        | 0.92            | 1.87          | 3.93              | 4.2       | 3.72          | 1.77         | -0.11   | -0.08    | 3.73  | -0.18     | -0.18     | -0.09        | -0.14          |
| Run1_MDS5   | 284.42  | 6.43         | 0.95 | 6.34 | 2.33    | 3.98              | 354.97       | 365.99            | 540.94           | 254.2         | 259.34     | 333.53         | 350.11      | 14.78           | 0.84          | 5.85              | 6.89      | 2.57          | 1.4          | -0.1    | 0.54     | 4.84  | 0.79      | 0.83      | 0.3          | -0.17          |
| Run1_MDS6   | 10.26   | 3.18         | 3.03 | 2.79 | 3.11    | 6.89              | 62.27        | 127.31            | 129.62           | 38.82         | 43.26      | 27.23          | 10.27       | 2.31            | -0.09         | 5.47              | 1.41      | 2.98          | 1.31         | -0.23   | -0.16    | 3.16  | -0.07     | 0.13      | -0.19        | -0.26          |
| Run1_MDS8   | 3.58    | 2.1          | 1.45 | 1.71 | 1.89    | 4.26              | 33.45        | 119.89            | 118.41           | 13.98         | 19.96      | 5.35           | 4.43        | -0.1            | 0.12          | 0.82              | 0.22      | 2.42          | 0.99         | -0.35   | -0.16    | 2.79  | -0.3      | -0.08     | -0.31        | -0.36          |
| Run1_MDS9   | 4.46    | 2.75         | 3.01 | 2.33 | 2.94    | 3.28              | 11.01        | 59.82             | 72.19            | 20.24         | 23.76      | 9.75           | 7.01        | -0.02           | -0.06         | 2.86              | -0.06     | 2.86          | 0.82         | -0.32   | -0.28    | 3.73  | -0.25     | -0.02     | -0.3         | -0.34          |
| Run2_MDS12  | 16.66   | 4.26         | 3.16 | 3.59 | 3       | 34.89             | 137.78       | 169.06            | 175.79           | 17.38         | 38.43      | 22.84          | 7.44        | -0.15           | -0.3          | 1.24              | 34.86     | 2.99          | -0.04        | -0.27   | -0.12    | 2.3   | -0.16     | 3.82      | -0.24        | -0.29          |
| Run2_MDS14  | 1.96    | 1.6          | 0.4  | 3.18 | 0.76    | 6.41              | 23           | 150.6             | 140.63           | 26.21         | 29.89      | 18.68          | 1.72        | -0.17           | -0.3          | 2.16              | 1.96      | 2.57          | -0.1         | -0.23   | -0.2     | 1.8   | -0.22     | -0.32     | -0.25        | -0.22          |
| Run2_MDS19  | 1.74    | 1.76         | 2.21 | 1.15 | 2.65    | 7.24              | 32.41        | 44.69             | 38.35            | 11.2          | 11.08      | 3.32           | 0.9         | -0.01           | -0.23         | -0.11             | 0.86      | 2.44          | 0.17         | -0.25   | -0.15    | 2.62  | -0.29     | -0.24     | -0.26        | -0.25          |
| Run2_MDS20  | 3.13    | 1.92         | 1.78 | 1.49 | 2.82    | 10.43             | 55.12        | 201.84            | 194.69           | 23.24         | 33.36      | 14.13          | 5.23        | 2.67            | 1.16          | 3.92              | 0.35      | 3.2           | 1.82         | -0.26   | -0.04    | 3.9   | -0.23     | -0.17     | -0.2         | -0.27          |
| Run2_MDS28* | 14.68   | 2.47         | 2.24 | 1.73 | 2.31    | 22.63             | 81.45        | 117.31            | 163.87           | 26.61         | 31.45      | 21.94          | 8.81        | 0.7             | -0.13         | 9.24              | 11.3      | 2.65          | -0.01        | -0.26   | -0.21    | 11.76 | -0.23     | 0.62      | -0.24        | -0.28          |
| Run2_MDS5   | 298.94  | 5.49         | 0.59 | 3.01 | 2.26    | 4.67              | 307.22       | 382.89            | 562.18           | 290.28        | 257.41     | 341.85         | 354.91      | 3.61            | 0.98          | 176.3             | 3.04      | 1.82          | 1.38         | -0.15   | 0.36     | 3.15  | 0.55      | 0.79      | 0.01         | -0.21          |
| Run1_ICUS18 | 2.83    | 2.16         | 2.84 | 1.5  | 1.86    | 5.47              | 18.67        | 63                | 57.85            | 25.46         | 34.11      | 12.72          | 3.24        | 0.35            | 0.11          | 4.25              | 0.72      | 2.98          | 0.62         | -0.26   | -0.23    | 3.16  | -0.26     | -0.24     | -0.27        | -0.26          |
| Run1_ICUS22 | 6.57    | 2.22         | 2.24 | 2.07 | 2.62    | 8.84              | 45.67        | 139.7             | 134.27           | 30.12         | 37.27      | 19.61          | 5.48        | 0.73            | 0.91          | 7.32              | 3.58      | 3.43          | 0.67         | -0.24   | -0.27    | 6.31  | -0.27     | -0.08     | -0.2         | -0.25          |
| Run1_ICUS24 | 9.52    | 1.69         | 1.16 | 1.74 | 2.42    | 6.49              | 99.29        | 136.16            | 119.49           | 36.01         | 51         | 29.52          | 8.18        | -0.1            | -0.24         | 1.93              | 2.94      | 3.53          | -0.03        | -0.27   | -0.28    | 3.12  | -0.2      | -0.15     | -0.27        | -0.26          |
| Run1_NI-1   | 4.53    | 1.06         | 0.49 | 1.1  | 1.68    | 5.17              | 51.45        | 97.03             | 88.65            | 30.81         | 37.1       | 18.74          | 3.36        | -0.12           | -0.19         | 4.17              | 2.19      | 2.59          | 0.23         | -0.33   | -0.26    | 2.21  | -0.15     | -0.15     | -0.34        | -0.33          |
| Run1_NI-3   | 2.51    | 1.42         | 1.13 | 1.41 | 1.86    | 9.2               | 62.9         | 69.06             | 52.57            | 16.27         | 17.5       | 4.99           | 1.02        | 0.62            | 0.2           | 2.73              | 2.4       | 2.36          | 0.66         | -0.3    | -0.22    | 2.5   | -0.18     | -0.14     | -0.3         | -0.3           |
| Run1_NI-4   | 4.98    | 3.08         | 1.59 | 3.04 | 2.71    | 9.09              | 79.55        | 75.28             | 53.74            | 19.55         | 22.29      | 8.93           | 1.97        | 0.77            | 0.28          | 6.43              | 2.61      | 2.29          | 1.13         | -0.29   | -0.23    | 2.89  | -0.29     | -0.08     | -0.3         | -0.27          |
| Run1_NI-6   | 10.22   | 1.94         | 1.21 | 0.86 | 1.71    | 8.3               | 140.23       | 163.41            | 143.18           | 50.24         | 58.52      | 31.31          | 6.16        | 0.29            | -0.09         | 10.27             | 3.21      | 3.32          | 0.64         | -0.26   | -0.24    | 3.67  | -0.2      | -0.03     | -0.21        | -0.27          |
| Run2_NI-3   | 1.96    | 1.29         | 1.08 | 1.02 | 1.87    | 6.07              | 62.65        | 50.27             | 14.6             | 12.21         | 2.3        | 2.01           | 0.71        | 0.14            | 0.06          | 1.17              | 2.01      | 2.04          | 0.3          | -0.29   | -0.25    | 2.05  | -0.29     | -0.16     | -0.29        | -0.29          |
| Run2_NI-4   | 4.25    | 2.39         | 2.14 | 1.89 | 2.18    | 11.72             | 71.99        | 65.56             | 49               | 18.81         | 17.4       | 6.02           | 1.39        | 0.41            | 0.09          | 3.7               | 2.29      | 2.91          | 0.99         | -0.27   | -0.27    | 2.85  | -0.19     | -0.07     | -0.29        | -0.27          |
| Run2_NI-5   | 2.09    | 1.08         | 1.19 | 0.87 | 1.98    | 11.91             | 91.31        | 78.89             | 62.34            | 14.74         | 19.59      | 5.69           | 1.28        | 0.31            | -0.23         | 1.85              | 2         | 1.68          | 0.21         | -0.3    | -0.26    | 1.94  | -0.15     | -0.23     | -0.31        | -0.3           |
| Run2_NI-6   | 9.92    | 1.22         | 0.99 | 0.96 | 1.59    | 9.48              | 143.8        | 178.25            | 158.49           | 49.81         | 58.59      | 27.91          | 4.88        | 0.27            | -0.19         | 3.26              | 2.56      | 2.89          | 0.58         | -0.25   | -0.26    | 2.95  | -0.24     | -0.08     | -0.25        | -0.26          |

Supplemental Table 3: Median expression of each surface marker on each cell population.

|             |             | CD16 Median |              |       |       |         |                   |              |                   |                  |               |            |                |             |                  |               |                   |           |               |              |         |          |       |           |           |              |                |      |
|-------------|-------------|-------------|--------------|-------|-------|---------|-------------------|--------------|-------------------|------------------|---------------|------------|----------------|-------------|------------------|---------------|-------------------|-----------|---------------|--------------|---------|----------|-------|-----------|-----------|--------------|----------------|------|
|             |             | Ungated     | CD34-CD38low | HSCs  | MPP   | CMP/GMP | Myelo/Mono-Blasts | ProMonocytes | CD14neg Monocytes | Mature Monocytes | ProMyelocytes | Myelocytes | MetaMyelocytes | MatureGrans | ProErythroblasts | Erythroblasts | LateErythroblasts | PreBCells | Mature Bcells | Plasma Cells | T cells | NK cells | pDCs  | Basophils | Platelets | CD8+ T cells | CD8neg T cells |      |
| AML/RAEB-T  | Run1_MDS17  | 1           | 0.11         | 0.14  | 0.03  | 0.55    | 0.04              | 0.41         | 1.07              | 1.63             | 1.05          | 1.52       | 3.08           | 12.61       | 0.08             | 0.2           | 0.6               | 0.87      | -0.06         | 0.1          | 0.17    | 4.55     | 0.07  | 0.5       | 1.63      | 0.04         | 0.35           |      |
|             | Run2_MDS15* | 0.92        | -0.22        | -0.21 | -0.25 | -0.09   | -0.12             | 4.98         | 2.01              | 0.36             | 0.74          | 2.06       | 24.68          | -0.14       | 1.04             | 1.49          | 4.69              | -0.15     | -0.15         | 0.31         | 2.78    | 0.2      | 0.49  | 1.08      | 0.13      | 0.46         |                |      |
|             | Run2_MDS4   | 0.84        | -0.19        | -0.18 | -0.15 | -0.38   | -0.26             | -0.21        | -0.03             | 0.46             | 0.52          | 1.18       | 4.8            | 19.88       | -0.13            | 0.07          | 0.32              | 0.08      | -0.12         | -0.26        | -0.04   | 0.14     | -0.13 | 1.21      | 3.09      | -0.1         | 0.05           |      |
|             | Run1_MDS21  | 0.85        | 0.16         | 0.16  | 0.09  | 0.17    | 0.18              | 0.33         | 0.7               | 2.04             | 0.82          | 1.62       | 4.27           | 14.48       | 0.28             | 0.75          | 8.31              | 0.07      | -0.02         | -0.45        | 0.53    | 2.06     | 0.91  | 0.99      | 6.63      | 0.37         | 0.6            |      |
| Higher Risk | Run1_MDS3   | 0.83        | 0.07         | -0.07 | -0.01 | 0.1     | 0.17              | 0.2          | 0.61              | 1.56             | 0.9           | 1.86       | 3.38           | 13.97       | 0.27             | 0.66          | 3.4               | 0.14      | -0.01         | 0.08         | 0.55    | 3.47     | 1.13  | 1.22      | 4.63      | 0.29         | 0.67           |      |
|             | Run2_MDS13  | 0.46        | -0.24        | -0.22 | -0.25 | -0.17   | -0.15             | 0.11         | 0.33              | 1                | 0.75          | 1.47       | 2.91           | 13.65       | -0.11            | 0.07          | 0.3               | -0.1      | -0.21         | -0.21        | 0.19    | 1.82     | 1     | 0.64      | 2.31      | 0.04         | 0.27           |      |
|             | Run2_MDS16  | 6.44        | -0.1         | -0.12 | -0.16 | -0.03   | 0.65              | 2.68         | 0.42              | 0.5              | 1.29          | 2.46       | 5.58           | 25.06       | -0.1             | 0.12          | 5.92              | 0.49      | -0.16         | -0.17        | 0.25    | 84.39    | 0.66  | 0.61      | 5.36      | 0.11         | 0.28           |      |
|             | Run2_MDS1   | 0.81        | -0.02        | -0.09 | -0.08 | -0.03   | -0.12             | -0.07        | 0.22              | 0.7              | 0.27          | 0.91       | 3.89           | 16.07       | -0.01            | 0.31          | 0.22              | 0.76      | 0.14          | -0.13        | 0.25    | 2.65     | 0.21  | 0.2       | 3.84      | -0.01        | 0.3            |      |
|             | Run2_MDS21  | 0.5         | -0.16        | -0.09 | -0.17 | -0.14   | -0.13             | 0.15         | 0.4               | 1.29             | 0.87          | 1.59       | 3.44           | 14.97       | -0.08            | -0.08         | 0.09              | -0.11     | -0.15         | -0.08        | 0.24    | 0.7      | 1.77  | 0.51      | 4.6       | 0.12         | 0.31           |      |
|             | Run2_MDS26* | 1.77        | 0            | -0.02 | -0.04 | 0.03    | 0.02              | 0.74         | 0.64              | 1.4              | 0.39          | 0.79       | 3.61           | 13.46       | 0.24             | 0.33          | -0.03             | 0.59      | -0.16         | -0.13        | 0.24    | 17.96    | 0.81  | 0.86      | 1.5       | 0.05         | 0.34           |      |
|             | Run2_MDS27  | 0.96        | -0.14        | -0.14 | -0.18 | 0.15    | -0.02             | 0.88         | 0.37              | 0.72             | 1.22          | 1.78       | 5.15           | 26.92       | -0.03            | -0.03         | -0.02             | 0.47      | -0.17         | -0.21        | 0.11    | 36.73    | 25.67 | 0.3       | 1.92      | 0            | 0.24           |      |
|             | Run2_MDS2   | 2.14        | -0.29        | -0.29 | -0.32 | -0.25   | -0.17             | -0.06        | 0.34              | 0.31             | 0.61          | 0.97       | 4.4            | 16.36       | 0.35             | 1.96          | 2.51              | 0.99      | -0.22         | -0.17        | 0.13    | 9.68     | 1.71  | 0.45      | 4.28      | 0.01         | 0.13           |      |
|             | Run2_MDS3   | 0.51        | -0.15        | -0.2  | -0.13 | -0.18   | -0.15             | 0.16         | 0.29              | 1.36             | 0.92          | 1.78       | 2.71           | 13.34       | -0.13            | -0.04         | -0.09             | -0.1      | -0.17         | -0.31        | 0.25    | 2.15     | 0.44  | 0.89      | 3.47      | 0.1          | 0.32           |      |
|             | Lower Risk  | Run1_MDS23  | 3.37         | 0.09  | 0.06  | 0.17    | 0.01              | -0.1         | 0.18              | 0.44             | 0.91          | 1.17       | 1.76           | 4.64        | 16.71            | 0.51          | 0.75              | 2.84      | 0.87          | -0.15        | 0.03    | 0.62     | 1.28  | 0.09      | 1.05      | 4.2          | 0.36           | 0.72 |
| Run1_MDS25  |             | 21.72       | 6.18         | -0.08 | 8.92  | 0.11    | 0.72              | 0.51         | 0.63              | 1.42             | 1.37          | 2.68       | 6.65           | 30.26       | 0.72             | 1.05          | 3.02              | 19.02     | 0.8           | -0.06        | -0.17   | 0.52     | 22.21 | 0.24      | 0.94      | 5.44         | 0.41           | 0.66 |
| Run1_MDS5   |             | 19.56       | 3.69         | -0.9  | 1.41  | -0.03   | -0.09             | 0.65         | 1.47              | 1.55             | 1.3           | 7.26       | 6.19           | 36.25       | 1.42             | 1.42          | 6.64              | 5.83      | 0.35          | -0.14        | 0.56    | 9.43     | 1.33  | 1.31      | 3.1       | 0.34         | 0.64           |      |
| Run1_MDS6   |             | 16.49       | -0.07        | -0.17 | -0.2  | -0.15   | -0.08             | 0.26         | 0.43              | 1.07             | 1.71          | 2.37       | 4.99           | 32.47       | 0.13             | 0.36          | 15.15             | 0.45      | -0.06         | -0.08        | 0.54    | 3.82     | 1.05  | 1.51      | 8         | 0.47         | 0.5            |      |
| Run1_MDS8   |             | 14.19       | 1.53         | 1.53  | 0.84  | -0.03   | 0.88              | 2.1          | 0.61              | 1.16             | 1.63          | 2.67       | 6.74           | 23.27       | 0.46             | 0.99          | 5.29              | 1.13      | 0.15          | -0.19        | 0.4     | 12.88    | 1.76  | 1.32      | 6.71      | 0.31         | 0.43           |      |
| Run1_MDS9   |             | 5.98        | 0.16         | 0.06  | 0.13  | 0.17    | 0.69              | 10.53        | 1.13              | 1.52             | 1.68          | 2.41       | 5.97           | 20.87       | 0.37             | 0.7           | 11.19             | 1.33      | 0.09          | 0.05         | 0.66    | 20.94    | 16.43 | 1.33      | 4         | 0.55         | 0.72           |      |
| Run2_MDS12  |             | 3.21        | -0.32        | -0.27 | -0.3  | -0.13   | -0.29             | -0.04        | 0.28              | 0.72             | 0.62          | 1.29       | 4.12           | 15.31       | -0.16            | -0.03         | 0.61              | 0.23      | -0.1          | -0.16        | 0.05    | 0.56     | -0.16 | 0.29      | 4.5       | -0.02        | 0.12           |      |
| Run2_MDS14  |             | 30.99       | 2.85         | 0.62  | 2.79  | 0.2     | 0.26              | 0.62         | 0.2               | 0.64             | 1.52          | 2.48       | 4.64           | 50.15       | -0.14            | -0.08         | 37.39             | 0.28      | -0.1          | -0.14        | 0.26    | 2.12     | -0.08 | 0.91      | 3.34      | 0.06         | 0.38           |      |
| Run2_MDS19  |             | 6.5         | 0.08         | 0.38  | 0     | -0.16   | -0.13             | 0.18         | 0.3               | 0.67             | 1.08          | 2.21       | 4.89           | 24.2        | -0.14            | -0.06         | 0.14              | 0.73      | -0.13         | 0.07         | 0.4     | 7.73     | 0.01  | 0.5       | 7.24      | 0.09         | 0.51           |      |
| Run2_MDS20  |             | 11.2        | -0.12        | -0.32 | -0.3  | 0.03    | 1.31              | 3.46         | 0.22              | 0.58             | 1.12          | 1.9        | 5.29           | 44.31       | -0.04            | 0.61          | 24.94             | 0.68      | -0.14         | -0.14        | 0.38    | 1.76     | 36.05 | 0.64      | 5.11      | 0.15         | 0.4            |      |
| Run2_MDS28* | 6.6         | -0.01       | -0.07        | -0.03 | -0.07 | -0.25   | -0.15             | 0.23         | 0.5               | 1.34             | 1.93          | 4.97       | 23.89          | 0.12        | 0.19             | 5.91          | 0.64              | -0.14     | -0.15         | 0.24         | 1.88    | 1.15     | 0.8   | 4.61      | 0.11      | 0.37         |                |      |
| Run2_MDS5   | 16.72       | 2.74        | -0.04        | 0.31  | -0.09 | -0.04   | 0.5               | 0.88         | 0.87              | 0.88             | 6.58          | 5.72       | 32.49          | -0.23       | 0.83             | 7.54          | 4.57              | -0.15     | -0.18         | 0.22         | 8.12    | 0.54     | 0.64  | 2.92      | -0.02     | 0.3          |                |      |
| ICUS        | Run1_ICUS18 | 27.18       | 0.82         | -0.31 | 0.25  | 0.32    | 1.95              | 1.62         | 0.47              | 0.98             | 1.59          | 2.56       | 6.05           | 36.28       | 0.56             | 0.84          | 42.41             | 1.33      | -0.03         | -0.18        | 0.77    | 29.78    | 0.4   | 0.99      | 6.07      | 0.59         | 0.81           |      |
|             | Run1_ICUS22 | 18.61       | 0.35         | 0.7   | -0.06 | 0.3     | 0.01              | 0.57         | 0.46              | 1.1              | 1.93          | 2.56       | 5.5            | 40.84       | 0.36             | 0.9           | 27.38             | 0.74      | -0.08         | 0.05         | 0.72    | 3.63     | 1.94  | 1.18      | 5.66      | 0.48         | 0.81           |      |
|             | Run1_ICUS24 | 5.96        | 0.42         | 0.47  | 0.36  | 0.17    | -0.04             | 0.21         | 0.53              | 1.13             | 1.84          | 2.14       | 4.97           | 23.51       | 0.17             | 0.46          | 9.98              | 0.35      | -0.1          | -0.11        | 0.56    | 4.38     | 0.07  | 1.2       | 8.84      | 0.33         | 0.77           |      |
|             | Run1_NI-1   | 10.18       | 0.36         | 0.45  | 0.2   | 0.16    | 0.33              | 0.89         | 0.52              | 1.1              | 1.82          | 2.05       | 4.91           | 35.21       | 0.39             | 0.73          | 18.78             | 0.5       | 0.09          | -0.08        | 0.72    | 5.88     | 0.52  | 1.56      | 11.18     | 0.5          | 0.84           |      |
| Normal      | Run1_NI-3   | 5.15        | 0.46         | 0.41  | 0.23  | -0.02   | -0.03             | 0.25         | 0.64              | 1.18             | 1.4           | 2.25       | 4.94           | 19.01       | 0.67             | 0.53          | 11.87             | 0.39      | -0.08         | -0.16        | 0.38    | 1.77     | 0.3   | 1.05      | 2.73      | 0.14         | 0.54           |      |
|             | Run1_NI-4   | 5.35        | 0.17         | 0.36  | 0.14  | 0.15    | -0.05             | 0.21         | 0.52              | 1.1              | 1.42          | 2.1        | 4.85           | 18.37       | 0.7              | 0.71          | 10.09             | 0.4       | -0.03         | -0.07        | 0.4     | 6.07     | -0.03 | 1.38      | 2.51      | 0.19         | 0.55           |      |
|             | Run1_NI-6   | 5.24        | 0.39         | 0.38  | 0.24  | 0.24    | -0.01             | 0.24         | 0.43              | 0.82             | 1.21          | 1.86       | 4.77           | 24.18       | 0.27             | 0.41          | 6.91              | 0.33      | -0.11         | -0.15        | 0.48    | 2.65     | 0.41  | 0.87      | 2.19      | 0.15         | 0.57           |      |
|             | Run2_NI-3   | 3.59        | -0.04        | 0.16  | -0.16 | -0.06   | -0.17             | 0.03         | 0.23              | 0.57             | 0.89          | 1.94       | 4.56           | 16.32       | -0.01            | 0.18          | 7.94              | 0.1       | -0.17         | -0.23        | 0.05    | 1.29     | -0.06 | 0.59      | 2.87      | -0.1         | 0.19           |      |
|             | Run2_NI-4   | 3.8         | 0.06         | 0.38  | -0.07 | -0.13   | -0.21             | -0.02        | 0.1               | 0.47             | 0.91          | 1.78       | 4.26           | 16.34       | 0.1              | 0.32          | 6.75              | 0.01      | -0.18         | -0.23        | 0.06    | 5.4      | -0.17 | 0.47      | 3.23      | -0.05        | 0.18           |      |
|             | Run2_NI-5   | 3.61        | -0.08        | -0.09 | -0.1  | -0.02   | -0.13             | -0.01        | 0.15              | 0.52             | 0.9           | 1.95       | 4.86           | 19.83       | -0.06            | -0.04         | 8.79              | 0.11      | -0.14         | -0.23        | 0.01    | 1.6      | -0.02 | 0.67      | 2.97      | -0.08        | 0.14           |      |
| Run2_NI-6   | 4.61        | 0.05        | 0.22         | 0.01  | -0.07 | -0.19   | -0.13             | 0.01         | 0.45              | 0.64             | 1.37          | 4.34       | 20.23          | -0.13       | -0.01            | 2.91          | -0.04             | -0.2      | -0.24         | 0.13         | 2.52    | 0.09     | 0.52  | 3.03      | -0.04     | 0.2          |                |      |

Supplemental Table 3: Median expression of each surface marker on each cell population.

|             |             | CD11b Median |              |       |       |         |                   |              |                   |                  |               |            |                |             |                  |               |                   |           |               |              |         |          |       |           |           |              |                |
|-------------|-------------|--------------|--------------|-------|-------|---------|-------------------|--------------|-------------------|------------------|---------------|------------|----------------|-------------|------------------|---------------|-------------------|-----------|---------------|--------------|---------|----------|-------|-----------|-----------|--------------|----------------|
|             |             | Ungated      | CD34-CD38low | HSCs  | MPP   | CMP/GMP | Myelo/Mono-Blasts | ProMonocytes | CD14neg Monocytes | Mature Monocytes | ProMyelocytes | Myelocytes | MetaMyelocytes | MatureGrans | ProTryptroblasts | Erythroblasts | LateErythroblasts | PreBcells | Mature Bcells | Plasma Cells | T cells | NK cells | pDCs  | Basophils | Platelets | CD8+ T cells | CD8neg T cells |
| AML/RAEB-T  | Run1_MDS17  | 3.02         | -0.48        | -0.53 | -0.51 | -0.39   | -0.45             | 11.69        | 105.53            | 114.71           | 0.79          | 22.36      | 251.8          | 386.32      | -0.48            | -0.45         | 0.3               | 2.2       | -0.5          | -1.19        | 1.7     | 18.97    | -0.02 | 67.04     | 0.76      | 3.53         | -0.22          |
|             | Run2_MDS15* | 64.26        | -0.38        | -0.4  | -0.37 | -0.32   | -0.15             | 12.52        | 230.23            | 209.51           | 0.92          | 26.88      | 166.97         | 332.63      | -0.3             | 7.65          | 117.2             | 182.92    | -0.25         | -0.53        | 0.57    | 11.69    | 0.35  | 10.37     | -0.1      | 2.32         | -0.23          |
|             | Run2_MDS4   | 8.97         | -0.34        | -0.35 | -0.35 | -0.29   | -0.03             | 14.62        | 74.43             | 86.67            | 0.97          | 24.61      | 206.87         | 325.35      | -0.31            | -0.25         | 0.72              | 0.03      | -0.28         | -0.35        | 0.39    | 8.56     | -0.23 | 50.56     | 1.53      | 1.89         | -0.29          |
|             | Run1_MDS21  | 0.93         | -0.48        | -0.58 | -0.55 | -0.58   | -0.55             | 9.22         | 123.08            | 149.93           | 0.9           | 16.93      | 255.86         | 429.5       | -0.46            | -0.23         | 2.98              | -0.41     | -0.57         | -0.61        | 0.14    | 15.52    | -0.1  | 54.82     | 0.41      | 2.22         | -0.39          |
| Higher Risk | Run1_MDS3   | 1.06         | -0.48        | -0.66 | -0.53 | -0.59   | -0.57             | 8.24         | 69.25             | 122.84           | 1.1           | 16.95      | 189.8          | 321.13      | -0.48            | -0.23         | 2.03              | -0.43     | -0.62         | -0.99        | 0.16    | 18.22    | 6.46  | 31.7      | 0.19      | 2.57         | -0.43          |
|             | Run2_MDS13  | 0.62         | -0.35        | -0.3  | -0.36 | -0.35   | -0.34             | 13.07        | 94.99             | 104.66           | 0.57          | 18.58      | 246.85         | 357.39      | -0.32            | -0.3          | -0.08             | -0.27     | -0.27         | -0.49        | 0.16    | 10.01    | 1.26  | 30.63     | 0.1       | 2.3          | -0.23          |
|             | Run2_MDS16  | 87           | -0.28        | -0.29 | -0.3  | -0.28   | 0.32              | 12.52        | 79.9              | 113.3            | 1.27          | 30.96      | 146.2          | 212.8       | -0.29            | -0.3          | 32.39             | 0.17      | -0.34         | -0.56        | -0.15   | 30.55    | 0.06  | 14.1      | 0.34      | 2.06         | -0.3           |
|             | Run2_MDS1   | 14.17        | -0.27        | -0.59 | -0.25 | -0.36   | -0.27             | 11.71        | 153.04            | 222.77           | 1.47          | 30.19      | 193.83         | 298.99      | -0.31            | -0.21         | -0.06             | 2.85      | 0.02          | -0.42        | -0.12   | 46.36    | -0.21 | 13.19     | 0.35      | 2.03         | -0.24          |
|             | Run2_MDS21  | 0.5          | -0.34        | -0.32 | -0.34 | -0.34   | -0.33             | 14.16        | 151.92            | 180.75           | 0.9           | 18.5       | 298.8          | 457.66      | -0.28            | -0.33         | -0.15             | -0.31     | -0.25         | -0.7         | 0       | 3.41     | -0.11 | 46.27     | 0.48      | 1.87         | -0.24          |
|             | Run2_MDS26* | 85.45        | -0.24        | -0.19 | -0.27 | -0.31   | -0.25             | 8.96         | 151.44            | 209.18           | 1.75          | 25.47      | 253.11         | 413.86      | -0.22            | -0.29         | -0.26             | 1         | -0.31         | -0.49        | 0.15    | 34.55    | 0.36  | 32.12     | 2.24      | 1.8          | -0.24          |
|             | Run2_MDS27  | 1.29         | -0.31        | -0.31 | -0.34 | -0.26   | -0.22             | 13.23        | 110.75            | 193.36           | 0.76          | 25.32      | 184.36         | 318.13      | -0.33            | -0.33         | -0.15             | 0.81      | -0.34         | -0.43        | 0.61    | 17.81    | 1.52  | 6.51      | 0.41      | 1.96         | -0.26          |
|             | Run2_MDS2   | 109.5        | -0.41        | -0.37 | -0.44 | -0.41   | -0.3              | 13.55        | 130.71            | 142.76           | 0.84          | 30.03      | 319.84         | 369.39      | 0.13             | 5.85          | 1.67              | 0.53      | 0.35          | -0.38        | -0.23   | 19.57    | 3.82  | 6.38      | -0.05     | 1.91         | -0.27          |
|             | Run2_MDS3   | 0.6          | -0.3         | -0.26 | -0.3  | -0.35   | -0.33             | 13.46        | 103.15            | 87.99            | 0.87          | 18.85      | 191.22         | 316.29      | -0.29            | -0.33         | -0.23             | -0.3      | -0.25         | -0.4         | 0       | 13.99    | 0.2   | 39.66     | 0.21      | 2.18         | -0.26          |
|             | Run1_MDS23  | 127.3        | -0.61        | -0.46 | -0.59 | -0.82   | -0.41             | 13.7         | 102.1             | 171.14           | 1.93          | 26.93      | 206.29         | 348.67      | -0.47            | -0.37         | 47.23             | 6.55      | -0.46         | -1.23        | -0.08   | 23.35    | -0.76 | 25.72     | 2.23      | 1.95         | -0.44          |
| Run1_MDS25  | 215.56      | 119.05       | -0.92        | -0.8  | -0.8  | 0.09    | 14.71             | 105.72       | 165.25            | 1.25             | 30.1          | 167.24     | 255.55         | -0.34       | 0.51             | 244.3         | 6.98              | -0.81     | -0.93         | 0.95         | 13.34   | -0.59    | 16.87 | -0.06     | 2.71      | -0.33        |                |
| Run1_MDS5   | 96.51       | 2.65         | -1.76        | 1.11  | -0.77 | -0.38   | 16.39             | 145.9        | 161.17            | 1.54             | 37.35         | 111.6      | 131.84         | 0.57        | 0.25             | 15.55         | 44.83             | -0.25     | -1.28         | -0.05        | 9.05    | 25.04    | 24.53 | 2.36      | 1.36      | -0.37        |                |
| Run1_MDS6   | 166.45      | -0.6         | -0.58        | -0.63 | -0.67 | -0.45   | 13.2              | 100.94       | 180.1             | 1.25             | 28.26         | 141.82     | 248.89         | -0.33       | -0.52            | 106.13        | 0.42              | -0.55     | -1.21         | 0.47         | 26.58   | 1.6      | 49.18 | 0.8       | 2.14      | -0.43        |                |
| Run1_MDS8   | 182.92      | 0.68         | -0.46        | 0.53  | -0.63 | -0.1    | 14.38             | 119          | 181.85            | 1.37             | 28.91         | 160.23     | 251.69         | -0.46       | -0.36            | 2.42          | 2.09              | -0.58     | -0.24         | -0.12        | 20.63   | 9.21     | 20.47 | 0.6       | 1.18      | -0.39        |                |
| Run1_MDS9   | 82.73       | -0.56        | -0.67        | -0.62 | -0.65 | -0.29   | 12.29             | 84.65        | 135.33            | 1.72             | 24.22         | 160.99     | 274.6          | -0.46       | -0.48            | 13.91         | 2.78              | -0.51     | -1.4          | 0.28         | 23.08   | 2.01     | 15.01 | 1.08      | 2.29      | -0.39        |                |
| Run2_MDS12  | 198.4       | -0.35        | -0.29        | -0.36 | -0.35 | -0.17   | 14.12             | 91.94        | 126.55            | 1.85             | 29.21         | 287.08     | 467.96         | -0.34       | -0.31            | 1.52          | 7.59              | -0.3      | -0.43         | -0.01        | 10.31   | -0.27    | 16.96 | 1.13      | 1.22      | -0.28        |                |
| Run2_MDS14  | 233.89      | 0.31         | -0.43        | -0.18 | -0.58 | 0.26    | 13.23             | 103.53       | 189.69            | 2.21             | 29.28         | 152.68     | 307.61         | -0.34       | -0.31            | 248.44        | -0.16             | -0.33     | -0.41         | 0.15         | 25.66   | -0.12    | 9.05  | 0.21      | 2.03      | -0.23        |                |
| Run2_MDS19  | 122.31      | -0.25        | -0.2         | -0.27 | -0.39 | -0.12   | 13.72             | 89.34        | 130.82            | 1.56             | 25.65         | 143.02     | 236.19         | -0.33       | -0.29            | -0.04         | 4.29              | -0.34     | -0.43         | -0.08        | 15.01   | -0.32    | 23.76 | 0.67      | 2.29      | -0.26        |                |
| Run2_MDS20  | 173.59      | -0.09        | -0.39        | 0.28  | -0.31 | 0.6     | 13.54             | 114.38       | 170.29            | 1.37             | 25.86         | 185.43     | 360.41         | -0.22       | -0.2             | 259.81        | 1.08              | -0.11     | -0.28         | -0.08        | 7.83    | 1.69     | 12.23 | 0.29      | 2.19      | -0.15        |                |
| Run2_MDS28* | 262.32      | -0.29        | -0.28        | -0.26 | -0.33 | -0.07   | 13.98             | 176.22       | 215.3             | 1.67             | 24.84         | 240.5      | 479.16         | -0.22       | -0.22            | 238.77        | 36.01             | -0.27     | -0.35         | 0.4          | 38.26   | 13.64    | 21.46 | 0.41      | 2         | -0.24        |                |
| Run2_MDS5   | 101         | 6.71         | 0.05         | 0.35  | -0.12 | 0.04    | 15.85             | 152.69       | 166.3             | 1.47             | 35.65         | 120.85     | 141.81         | -0.34       | 0.03             | 82.63         | 22.61             | -0.19     | -0.55         | 0.07         | 6.25    | 24.6     | 22.67 | 1.2       | 1.27      | -0.17        |                |
| ICUS        | Run1_ICUS18 | 256.33       | -0.27        | -0.76 | -0.77 | -0.72   | 0.09              | 13.3         | 93.9              | 176.28           | 1.5           | 28.26      | 180.25         | 320.6       | -0.4             | -0.3          | 353.01            | 3.42      | -0.49         | -1.35        | -0.17   | 44.39    | -0.58 | 21.17     | 0.42      | 2.71         | -0.44          |
|             | Run1_ICUS22 | 337.3        | -0.58        | -0.72 | -0.7  | -0.76   | -0.19             | 13.61        | 123.05            | 224.3            | 1.91          | 23.61      | 220.46         | 460.41      | -0.47            | -0.16         | 393.24            | 0.09      | -0.75         | -0.8         | 0.01    | 18.86    | 0.61  | 22.2      | 0.34      | 1.98         | -0.39          |
|             | Run1_ICUS24 | 191.74       | -0.32        | -0.22 | -0.52 | -0.71   | -0.41             | 14.04        | 101.56            | 194.34           | 1.72          | 24.55      | 207.08         | 395.68      | -0.52            | -0.4          | 4.54              | -0.44     | -0.67         | -1           | 0.55    | 20.54    | -0.67 | 19.43     | 0.74      | 1.75         | -0.2           |
| Normal      | Run1_NI-1   | 228.64       | 0.1          | 0.2   | -0.13 | -0.43   | -0.28             | 14           | 71.39             | 173.28           | 1.34          | 26.03      | 184.55         | 370.35      | -0.45            | -0.4          | 267.85            | -0.54     | -0.62         | -1.4         | 0.24    | 39.4     | -0.38 | 16.97     | 0.66      | 2.03         | -0.36          |
|             | Run1_NI-3   | 92.37        | -0.36        | -0.56 | -0.7  | -0.51   | -0.4              | 14.15        | 75.3              | 160.54           | 1.27          | 32.13      | 115.85         | 171.35      | -0.39            | -0.4          | 170.51            | -0.05     | -0.57         | -0.98        | 0.35    | 21.92    | -0.44 | 12.93     | 0.48      | 2.26         | -0.44          |
|             | Run1_NI-4   | 117.91       | -0.31        | -0.72 | -0.73 | -0.75   | -0.39             | 14.5         | 95.19             | 158.61           | 1.2           | 29.2       | 139.46         | 204.71      | -0.3             | -0.37         | 205.55            | -0.15     | -0.63         | -1.17        | 0.35    | 25.65    | -0.76 | 12.89     | 0.09      | 1.94         | -0.26          |
|             | Run1_NI-6   | 114.93       | -0.42        | -0.48 | -0.46 | -0.73   | -0.63             | 13.9         | 71.24             | 126.28           | 1.25          | 27.58      | 140.17         | 232.36      | -0.51            | -0.45         | 172               | -0.59     | -0.7          | -1.18        | -0.08   | 33.72    | -0.31 | 12.34     | -0.28     | 1.89         | -0.47          |
|             | Run2_NI-3   | 73.26        | -0.31        | -0.32 | -0.4  | -0.32   | -0.17             | 13.42        | 92.88             | 148.6            | 1.33          | 31.75      | 112.19         | 151.2       | -0.33            | -0.26         | 133.45            | -0.07     | -0.35         | -0.43        | 0.13    | 17.55    | -0.28 | 8.4       | 0.29      | 1.85         | -0.29          |
|             | Run2_NI-4   | 95.21        | -0.31        | -0.23 | -0.3  | -0.3    | -0.14             | 14.33        | 99.55             | 127.53           | 1.26          | 30.63      | 132.54         | 170.99      | -0.27            | -0.26         | 161.76            | -0.11     | -0.35         | -0.42        | 0.42    | 20.67    | -0.3  | 8         | 0.14      | 1.55         | -0.18          |
| Run2_NI-5   | 84.02       | -0.22        | -0.28        | -0.25 | -0.32 | -0.13   | 13.67             | 107.55       | 157.07            | 0.85             | 28.43         | 144.69     | 186.26         | -0.27       | -0.31            | 163.52        | -0.23             | -0.32     | -0.44         | 0.36         | 13.86   | -0.34    | 12.81 | 0.13      | 1.99      | -0.28        |                |
| Run2_NI-6   | 125.12      | -0.29        | -0.34        | -0.26 | -0.31 | -0.22   | 13.94             | 81.14        | 124.72            | 1.25             | 27.64         | 163.64     | 231.23         | -0.31       | -0.27            | 101.18        | -0.27             | -0.37     | -0.44         | -0.09        | 35.51   | -0.19    | 8.08  | 0.16      | 1.55      | -0.29        |                |



Supplemental Table 3: Median expression of each surface marker on each cell population.

|             |             | CD15 Median |              |       |       |         |                   |              |                   |                  |               |            |                |             |                  |               |                   |           |               |              |         |          |       |           |           |              |                |       |
|-------------|-------------|-------------|--------------|-------|-------|---------|-------------------|--------------|-------------------|------------------|---------------|------------|----------------|-------------|------------------|---------------|-------------------|-----------|---------------|--------------|---------|----------|-------|-----------|-----------|--------------|----------------|-------|
|             |             | Ungated     | CD34-CD38low | HSCs  | MPP   | CMP/GMP | Myelo/Mono-Blasts | ProMonocytes | CD14neg Monocytes | Mature Monocytes | ProMyelocytes | Myelocytes | MetaMyelocytes | MatureGrans | ProErythroblasts | Erythroblasts | LateErythroblasts | PreBcells | Mature Bcells | Plasma Cells | T cells | NK cells | pDCs  | Basophils | Platelets | CD8+ T cells | CD8neg T cells |       |
| AML/RAEB-T  | Run1_MDS17  | 2.09        | 0.78         | 0.9   | 0.69  | 0.92    | 0.45              | 0.65         | 0.87              | 0.81             | 23.61         | 20.9       | 15.77          | 18.54       | -0.1             | -0.18         | 0.5               | 1.19      | -0.3          | -0.52        | -0.22   | 0.09     | 0.65  | 2.15      | 1.53      | -0.21        | -0.24          |       |
|             | Run2_MDS15* | 1.48        | 1.04         | 1.17  | 0.84  | 0.34    | 0.57              | 0.55         | 0.18              | -0.03            | 11.7          | 12.53      | 16.96          | 23.39       | 0.3              | 0.82          | 1.85              | 0.9       | -0.33         | -0.33        | -0.26   | -0.26    | -0.15 | 0.41      | 0.22      | 0.89         | -0.25          | -0.26 |
|             | Run2_MDS4   | 1.48        | 0.61         | 0.93  | 0.55  | -0.62   | -0.19             | -0.23        | -0.14             | 0.4              | 23.18         | 46.34      | 156.69         | 194.36      | -0.22            | -0.12         | 1.01              | -0.17     | -0.26         | -0.43        | -0.3    | -0.23    | -0.28 | 0.16      | 2.87      | -0.3         | -0.3           |       |
| Higher Risk | Run1_MDS21  | 1.35        | 0.8          | 0.67  | 0.72  | 0.63    | 0.57              | 1.27         | 0.51              | 0.91             | 41.07         | 78.24      | 107.87         | 155.14      | -0.16            | 0.02          | 3.93              | -0.2      | -0.31         | -0.7         | -0.23   | 0.14     | 1.08  | 0.6       | 1.15      | -0.2         | -0.24          |       |
|             | Run1_MDS3   | 2.21        | 0.99         | 0.96  | 0.87  | 0.87    | 0.69              | 1.03         | 0.12              | 0.67             | 50.46         | 102.68     | 118.15         | 184.26      | -0.2             | 0.03          | 3.33              | -0.17     | -0.3          | -0.67        | -0.27   | 0.08     | 2.8   | 0.68      | 0.72      | -0.27        | -0.27          |       |
|             | Run2_MDS13  | 1.69        | 0.52         | 0.68  | 0.45  | 0.3     | 0.28              | 0.17         | 0.1               | 0.49             | 41.68         | 71.16      | 76.66          | 83.1        | -0.25            | -0.24         | 0.23              | -0.23     | -0.29         | -0.29        | -0.26   | -0.2     | 0.78  | 0.15      | 0.91      | -0.25        | -0.27          |       |
|             | Run2_MDS16  | 169.58      | 1.28         | 1.51  | 1     | 0.94    | -0.18             | -0.14        | -0.11             | -0.05            | 130.42        | 150.41     | 347.39         | 372.46      | 0.4              | -0.26         | 6.2               | -0.09     | -0.31         | -0.48        | -0.26   | 0        | -0.09 | -0.13     | 0.71      | -0.24        | -0.26          |       |
|             | Run2_MDS1   | 0.58        | 0.12         | 0.42  | -0.08 | -0.12   | -0.25             | -0.18        | -0.18             | 0.04             | 12.54         | 16.81      | 37.34          | 67.79       | -0.17            | -0.13         | -0.06             | -0.05     | -0.2          | -0.43        | -0.29   | -0.07    | -0.26 | 0.03      | 0.8       | -0.32        | -0.29          |       |
|             | Run2_MDS21  | 0.83        | 0.39         | 0.47  | 0.37  | 0.36    | 0.28              | 0.62         | 0.27              | 0.66             | 74.86         | 105.68     | 149.68         | 188.04      | -0.23            | -0.24         | -0.07             | -0.26     | -0.31         | -0.29        | -0.26   | -0.23    | 0.04  | -0.15     | 0.98      | -0.25        | -0.26          |       |
|             | Run2_MDS26* | 24.66       | 0.44         | 0.55  | 0.31  | 0.29    | 0.13              | 0.66         | 0.43              | 0.15             | 17.46         | 24.03      | 79.29          | 102.73      | 0                | -0.19         | -0.16             | 0.19      | -0.26         | -0.41        | -0.25   | -0.05    | -0.12 | -0.05     | 5.88      | -0.25        | -0.25          |       |
|             | Run2_MDS27  | 0.79        | 0.94         | 1.3   | 0.65  | 0.25    | -0.06             | -0.09        | -0.02             | 0.05             | 72.82         | 124.46     | 376.59         | 476.38      | -0.08            | -0.3          | -0.13             | -0.07     | -0.28         | -0.42        | -0.26   | -0.05    | -0.27 | -0.2      | 1.8       | -0.25        | -0.27          |       |
|             | Run2_MDS2   | 3.08        | 0.01         | 0.57  | -0.05 | -0.1    | -0.22             | -0.26        | 0.04              | -0.15            | 16.95         | 19.34      | 33.76          | 70.12       | -0.13            | 2.01          | 1.09              | 0.05      | 0.21          | -0.13        | -0.29   | -0.15    | -0.16 | -0.34     | -0.15     | -0.28        | -0.29          |       |
|             | Run2_MDS3   | 1.55        | 0.62         | 1.02  | 0.53  | 0.46    | 0.41              | 0.68         | 0.45              | 1.39             | 69.86         | 144.56     | 173.91         | 240.35      | -0.21            | -0.25         | -0.13             | -0.26     | -0.24         | -0.4         | -0.29   | -0.13    | 1.26  | 0.44      | 0.89      | -0.26        | -0.3           |       |
| Lower Risk  | Run1_MDS23  | 37.92       | 0.47         | 0.92  | 0.5   | -0.13   | -0.27             | -0.14        | -0.08             | 0.07             | 17.92         | 32.75      | 96.84          | 107.17      | -0.2             | -0.07         | 3.7               | 0.07      | -0.27         | -0.62        | -0.25   | -0.14    | -0.24 | -0.01     | 2.15      | -0.26        | -0.25          |       |
|             | Run1_MDS25  | 201.19      | 22.96        | 1.73  | 164.3 | -0.63   | -0.44             | -0.29        | 0.01              | 0.48             | 60.28         | 91.98      | 223.39         | 250.57      | -0.15            | 0.31          | 185.5             | -0.02     | -0.43         | -0.7         | -0.24   | 0.05     | -0.33 | -0.16     | 0.53      | -0.23        | -0.25          |       |
|             | Run1_MDS5   | 12.9        | 4.42         | -0.24 | 0.72  | -0.21   | -0.27             | -0.11        | 0.63              | 0.43             | 28.38         | 20.61      | 26.54          | 24.4        | 2.62             | 0.33          | 4.8               | 1.05      | -0.25         | -0.57        | -0.23   | -0.05    | 0.02  | -0.04     | 2.23      | -0.3         | -0.21          |       |
|             | Run1_MDS6   | 162.34      | 0.65         | 0.58  | 0.56  | 0.01    | -0.1              | -0.11        | 0.01              | 0.19             | 126.02        | 179.51     | 312.58         | 208.68      | -0.09            | -0.22         | 103.39            | -0.15     | -0.3          | -0.59        | -0.23   | 0.03     | 0.01  | 0.19      | 1.77      | -0.22        | -0.24          |       |
|             | Run1_MDS8   | 247.68      | 1.95         | 1.19  | 3.01  | 0.52    | -0.1              | -0.17        | -0.13             | 0.2              | 86.43         | 168.41     | 310.93         | 361.7       | -0.21            | -0.03         | 2.48              | -0.04     | -0.26         | -0.68        | -0.19   | 0.03     | 0.08  | -0.07     | 1.52      | -0.18        | -0.19          |       |
|             | Run1_MDS9   | 133.35      | 0.86         | 1.1   | 0.6   | 0.53    | 0.05              | -0.18        | -0.02             | 0.39             | 71.02         | 118.64     | 295.63         | 369.15      | -0.08            | -0.13         | 11.09             | -0.06     | -0.3          | -0.62        | -0.22   | 0.13     | -0.01 | -0.1      | 1.64      | -0.21        | -0.23          |       |
|             | Run2_MDS12  | 64.74       | -0.15        | 0.13  | 0.02  | -0.01   | -0.3              | -0.11        | 0.09              | 0.19             | 24.47         | 29.64      | 122.12         | 164.81      | -0.24            | -0.26         | 0.73              | 0.01      | -0.28         | -0.57        | -0.27   | -0.18    | -0.26 | -0.19     | 1.24      | -0.26        | -0.28          |       |
|             | Run2_MDS14  | 223.59      | 4.73         | 0.89  | 0.19  | 0.3     | -0.27             | -0.25        | -0.12             | -0.04            | 349.72        | 235.12     | 382.84         | 274         | -0.16            | -0.21         | 242.32            | -0.27     | -0.31         | -0.43        | -0.28   | -0.22    | -0.09 | -0.06     | 0.66      | -0.28        | -0.28          |       |
|             | Run2_MDS19  | 383.05      | 1.38         | 2.25  | 1.11  | 0.45    | -0.19             | -0.14        | -0.04             | 0                | 141.12        | 262.89     | 545.41         | 572.28      | -0.18            | -0.18         | 0.34              | 0         | -0.29         | -0.53        | -0.25   | -0.16    | -0.31 | -0.1      | 0.89      | -0.23        | -0.26          |       |
|             | Run2_MDS20  | 128.3       | 1.53         | 1.69  | 0.99  | 0.45    | -0.28             | -0.27        | -0.23             | -0.06            | 81.38         | 115.6      | 301.14         | 335.36      | -0.23            | -0.13         | 227.26            | -0.18     | -0.35         | -0.51        | -0.25   | -0.17    | -0.12 | -0.12     | 0.59      | -0.24        | -0.25          |       |
| Run2_MDS28* | 286.11      | 0.86        | 1.19         | 1.04  | 0.32  | -0.15   | -0.1              | -0.04        | -0.09             | 78.33            | 134.66        | 412.76     | 468.07         | -0.08       | -0.09            | 274.52        | 0.16              | -0.3      | -0.54         | -0.26        | -0.1    | -0.23    | -0.09 | 1.01      | -0.23     | -0.28        |                |       |
| Run2_MDS5   | 16.55       | 2.64        | 0.47         | 0.82  | -0.28 | -0.22   | -0.22             | 0.22         | 0.28              | 28.26            | 21.33         | 34.9       | 30.81          | -0.14       | -0.03            | 6.14          | 0.71              | -0.26     | -0.58         | -0.25        | -0.22   | -0.07    | -0.02 | 1.74      | -0.31     | -0.22        |                |       |
| ICUS        | Run1_ICUS18 | 338.68      | 2.48         | 3.66  | 1.58  | 1.35    | -0.3              | -0.24        | -0.14             | 0.14             | 91.34         | 166.49     | 434.51         | 430.85      | 0                | 0.08          | 481.86            | -0.02     | -0.27         | -0.46        | -0.24   | 0.28     | -0.26 | 0.14      | 0.83      | -0.23        | -0.24          |       |
|             | Run1_ICUS22 | 425.18      | 1.51         | 2.05  | 1.22  | 0.39    | -0.34             | -0.2         | -0.1              | 0.15             | 146.67        | 227.73     | 540.41         | 559.38      | 0.05             | 0.44          | 499.71            | -0.2      | -0.34         | -0.63        | -0.2    | -0.12    | -0.24 | 0.27      | 1.11      | -0.2         | -0.19          |       |
|             | Run1_ICUS24 | 115.05      | 1.49         | 2.01  | 1.04  | 0.25    | -0.17             | -0.08        | 0.04              | 0.21             | 107.05        | 106.57     | 198.34         | 185.68      | -0.09            | -0.06         | 4.36              | -0.29     | -0.37         | -0.64        | -0.21   | -0.08    | -0.26 | 0.09      | 1.56      | -0.21        | -0.21          |       |
| Normal      | Run1_N1-1   | 175.19      | 1.66         | 1.45  | 1.28  | 0.13    | -0.28             | -0.07        | -0.09             | 0.14             | 46.38         | 80.9       | 275.05         | 264.87      | -0.13            | -0.08         | 212.44            | -0.37     | -0.35         | -0.71        | -0.24   | 0.05     | -0.17 | 0.16      | 1.22      | -0.23        | -0.26          |       |
|             | Run1_N1-3   | 153.56      | 2.28         | 2.31  | 1.79  | 0.75    | -0.01             | 0.15         | 0.25              | 0.31             | 34.68         | 87.95      | 279.46         | 253.98      | 0.29             | -0.11         | 287.64            | -0.15     | -0.29         | -0.56        | -0.23   | 0.09     | -0.11 | -0.09     | 1         | -0.23        | -0.23          |       |
|             | Run1_N1-4   | 116.38      | 2.63         | 2.14  | 2.52  | 0.64    | -0.09             | 0.21         | 0.32              | 0.35             | 35.9          | 57.69      | 222.75         | 174.2       | 0.17             | -0.06         | 230.38            | -0.22     | -0.33         | -0.68        | -0.22   | 0.02     | -0.14 | 0.04      | 1.09      | -0.2         | -0.24          |       |
|             | Run1_N1-6   | 111.01      | 1.94         | 2.44  | 1.43  | 0.37    | -0.11             | -0.04        | 0.03              | 0.15             | 28.48         | 77.1       | 255.23         | 180.52      | -0.12            | -0.17         | 174.58            | -0.33     | -0.35         | -0.55        | -0.22   | 0.14     | -0.17 | -0.18     | 0.53      | -0.2         | -0.23          |       |
|             | Run2_N1-3   | 199.67      | 1.73         | 2.28  | 1.6   | 0.31    | -0.13             | 0.01         | 0.02              | 0.1              | 41.85         | 124.95     | 359.35         | 368.06      | -0.12            | -0.18         | 322.06            | -0.2      | -0.31         | -0.44        | -0.27   | -0.12    | -0.18 | -0.2      | 0.79      | -0.26        | -0.28          |       |
|             | Run2_N1-4   | 167.6       | 1.6          | 1.7   | 1.06  | 0.2     | -0.14             | 0.01         | 0.02              | 0.13             | 46.42         | 82.86      | 295.65         | 269.18      | -0.14            | -0.14         | 289.69            | -0.27     | -0.32         | -0.43        | -0.26   | -0.13    | -0.29 | -0.15     | 0.92      | -0.25        | -0.27          |       |
| Run2_N1-5   | 156.93      | 1.27        | 1.26         | 1.17  | 0.17  | -0.1    | -0.03             | 0            | 0.18              | 46.99            | 138.53        | 426.41     | 325.58         | -0.04       | -0.21            | 288.97        | -0.31             | -0.27     | -0.41         | -0.27        | -0.11   | -0.19    | -0.14 | 0.58      | -0.26     | -0.27        |                |       |
| Run2_N1-6   | 190.45      | 1.31        | 1.71         | 1.15  | 0.28  | -0.17   | -0.18             | -0.13        | 0.02              | 33.67            | 93.6          | 319.58     | 314.48         | -0.17       | -0.22            | 146.68        | -0.29             | -0.34     | -0.44         | -0.28        | -0.06   | -0.27    | -0.19 | 0.8       | -0.28     | -0.28        |                |       |

Supplemental Table 3: Median expression of each surface marker on each cell population.

|             |             | CD123 Median |              |      |      |         |                   |              |                   |                  |               |            |                |             |                  |               |                   |           |               |              |         |          |        |           |           |              |                |
|-------------|-------------|--------------|--------------|------|------|---------|-------------------|--------------|-------------------|------------------|---------------|------------|----------------|-------------|------------------|---------------|-------------------|-----------|---------------|--------------|---------|----------|--------|-----------|-----------|--------------|----------------|
|             |             | Ungated      | CD34-CD38low | HSCs | MPP  | CMP/GMP | Myelo/Mono-Blasts | ProMonocytes | CD14neg Monocytes | Mature Monocytes | ProMyelocytes | Myelocytes | MetaMyelocytes | MatureGrans | ProErythroblasts | Erythroblasts | LateErythroblasts | PreBcells | Mature Bcells | Plasma Cells | T cells | NK cells | pDCs   | Basophils | Platelets | CD8+ T cells | CD8neg T cells |
| AML/RAEB-T  | Run1_MDS17  | -0.18        | 0.94         | 1.05 | 0.89 | 1.06    | 0.48              | 0.52         | -0.11             | -0.26            | -0.42         | -0.23      | -0.13          | -0.05       | -0.39            | -0.46         | -0.41             | -0.05     | -0.09         | 0.22         | -0.46   | -0.46    | 37.73  | 20.83     | -0.41     | -0.46        | -0.45          |
|             | Run2_MDS15* | 0.85         | 2.31         | 1.62 | 1.53 | 4.28    | 1.64              | 0.6          | -0.11             | -0.01            | 0.75          | 2.28       | 1.75           | -0.14       | 1.56             | 0.14          | 1.5               | 0.19      | 0.1           | 0.85         | -0.4    | -0.35    | 31.95  | 38.23     | 1.09      | -0.4         | -0.4           |
|             | Run2_MDS4   | -0.26        | 1.88         | 1.28 | 1.29 | 0.35    | 0.91              | 1.06         | 0.38              | 0.23             | -0.38         | -0.39      | -0.37          | -0.36       | -0.32            | -0.4          | -0.35             | 0.56      | 0.91          | 0.23         | -0.42   | -0.29    | 130.56 | 43.29     | -0.13     | -0.41        | -0.43          |
| Higher Risk | Run1_MDS21  | -0.33        | 1.08         | 1    | 1.02 | 1.36    | 1.14              | 0.66         | -0.3              | -0.25            | -0.42         | -0.37      | -0.38          | -0.29       | -0.46            | -0.41         | -0.28             | -0.31     | -0.14         | 0.15         | -0.48   | -0.42    | 65.34  | 46.06     | -0.41     | -0.45        | -0.49          |
|             | Run1_MDS3   | -0.33        | 1.24         | 1.19 | 1.07 | 1.45    | 1.27              | 0.92         | -0.06             | 0.56             | -0.39         | -0.33      | -0.32          | -0.2        | -0.45            | -0.44         | -0.29             | -0.34     | -0.08         | 0.51         | -0.49   | -0.34    | 46.13  | 41.98     | -0.36     | -0.49        | -0.49          |
|             | Run2_MDS13  | -0.21        | 1.56         | 1.77 | 1.3  | 1.39    | 1.15              | 0.14         | -0.08             | -0.1             | -0.2          | -0.04      | -0.28          | -0.31       | -0.17            | -0.42         | -0.34             | -0.28     | -0.21         | 0.85         | -0.42   | -0.42    | 43.78  | 31.57     | -0.34     | -0.41        | -0.42          |
|             | Run2_MDS16  | -0.33        | 1.53         | 1.42 | 1.25 | 1.85    | 2.88              | 2.37         | 0.65              | 0.45             | -0.26         | -0.32      | -0.34          | -0.34       | 0.75             | -0.42         | -0.33             | -0.2      | -0.21         | -0.04        | -0.42   | -0.37    | 111.7  | 59.77     | -0.36     | -0.42        | -0.42          |
|             | Run2_MDS1   | -0.24        | 2.49         | 3.05 | 2.37 | 2.51    | 2.72              | 1.36         | 0.74              | 0.74             | -0.3          | -0.3       | -0.33          | -0.36       | -0.16            | -0.41         | -0.39             | -0.11     | -0.2          | 0.13         | -0.43   | -0.39    | 83.2   | 41.21     | -0.29     | -0.44        | -0.43          |
|             | Run2_MDS21  | -0.3         | 0.81         | 1.11 | 0.74 | 1.08    | 0.76              | 0.49         | -0.18             | -0.12            | -0.35         | -0.3       | -0.34          | -0.32       | -0.34            | -0.43         | -0.39             | -0.33     | -0.21         | 0.18         | -0.42   | -0.41    | 66.49  | 50.84     | -0.36     | -0.41        | -0.43          |
|             | Run2_MDS26* | -0.37        | 0.62         | 0.7  | 0.56 | 0.77    | -0.12             | -0.2         | -0.15             | 0.06             | -0.39         | -0.36      | -0.36          | -0.36       | -0.21            | -0.42         | -0.4              | -0.28     | -0.14         | -0.25        | -0.42   | -0.41    | 38.92  | 48.44     | -0.4      | -0.43        | -0.42          |
|             | Run2_MDS27  | -0.26        | 0.71         | 0.68 | 0.61 | 0.9     | 0.96              | 1.96         | 0.71              | 0.49             | -0.27         | -0.08      | -0.12          | -0.24       | 0.65             | -0.42         | -0.39             | -0.22     | 0.2           | 0.3          | -0.38   | -0.4     | 84.07  | 249.82    | -0.2      | -0.36        | -0.39          |
|             | Run2_MDS2   | -0.23        | 1.19         | 1.89 | 0.91 | 1.34    | 1.54              | 1.45         | 0.2               | 0.42             | 0.12          | -0.36      | -0.33          | -0.32       | 0.87             | -0.28         | -0.32             | -0.17     | 0.8           | 1.52         | -0.43   | -0.41    | 44.36  | 54.88     | -0.34     | -0.41        | -0.43          |
|             | Run2_MDS3   | -0.26        | 1.02         | 1.31 | 0.83 | 1.17    | 0.95              | 0.33         | -0.02             | 0.33             | -0.26         | -0.18      | -0.23          | -0.21       | -0.29            | -0.4          | -0.4              | -0.3      | -0.16         | 0.53         | -0.42   | -0.37    | 91.6   | 31.36     | -0.33     | -0.43        | -0.42          |
| Lower Risk  | Run1_MDS23  | -0.32        | 0.83         | 0.79 | 0.7  | 2.95    | 2.67              | 2.71         | 1.49              | 1.11             | -0.36         | -0.35      | -0.39          | -0.4        | -0.41            | -0.4          | -0.16             | -0.06     | -0.08         | 0.18         | -0.48   | -0.43    | 74.98  | 38.4      | -0.38     | -0.46        | -0.49          |
|             | Run1_MDS25  | -0.36        | 2.05         | 3.35 | 0.32 | 4.24    | 3.63              | 2.31         | 0.72              | 0.35             | -0.36         | -0.38      | -0.42          | -0.4        | -0.38            | -0.38         | -0.14             | -0.01     | 0.52          | 0.27         | -0.44   | -0.39    | 241.64 | 34.53     | -0.45     | -0.44        | -0.44          |
|             | Run1_MDS5   | -0.2         | 2.13         | 1.59 | 0.46 | 2.41    | 1.67              | 1.14         | 1.04              | 0.27             | 0.31          | -0.09      | -0.01          | -0.18       | -0.06            | -0.38         | -0.26             | -0.01     | -0.23         | 0.45         | -0.44   | -0.42    | 70.62  | 54.51     | -0.42     | -0.43        | -0.44          |
|             | Run1_MDS6   | -0.33        | 2.28         | 1.66 | 1.72 | 2.29    | 3.46              | 4.05         | 1.24              | 0.68             | -0.38         | -0.3       | -0.32          | -0.36       | -0.06            | -0.48         | -0.31             | -0.15     | -0.06         | 0.75         | -0.46   | -0.47    | 88.49  | 82.5      | -0.38     | -0.46        | -0.47          |
|             | Run1_MDS8   | -0.37        | 0.74         | 0.51 | 0.27 | 0.91    | 1.06              | 1.29         | 0.46              | 0.01             | -0.4          | -0.41      | -0.38          | -0.37       | -0.4             | -0.42         | -0.36             | -0.33     | -0.31         | 0.26         | -0.5    | -0.44    | 68.34  | 144.27    | -0.41     | -0.49        | -0.5           |
|             | Run1_MDS9   | -0.34        | 1.39         | 1.53 | 0.94 | 1.92    | 1.89              | 4.5          | 0.76              | 0.43             | -0.38         | -0.37      | -0.36          | -0.33       | -0.35            | -0.45         | -0.24             | -0.29     | 0.23          | -0.02        | -0.48   | -0.43    | 48.15  | 116.85    | -0.41     | -0.46        | -0.49          |
|             | Run2_MDS12  | -0.26        | 6.14         | 3.24 | 5    | 4.69    | 3.79              | 1.73         | 0.87              | 0.81             | -0.35         | -0.28      | -0.29          | -0.3        | -0.33            | -0.42         | -0.34             | 0.32      | -0.01         | -0.18        | -0.39   | -0.39    | 160.43 | 55.23     | -0.26     | -0.38        | -0.4           |
|             | Run2_MDS14  | -0.3         | 0.71         | 0.61 | 0.29 | 0.6     | 2.66              | 3.11         | 1.02              | 0.67             | -0.26         | -0.26      | -0.28          | -0.34       | -0.35            | -0.41         | -0.26             | 0.14      | 0.08          | -0.15        | -0.42   | -0.38    | 129.2  | 50.41     | -0.29     | -0.41        | -0.43          |
|             | Run2_MDS19  | -0.31        | 0.92         | 1.02 | 0.8  | 1.27    | 3.69              | 2.69         | 0.9               | 0.54             | -0.33         | -0.31      | -0.33          | -0.33       | -0.34            | -0.43         | -0.39             | -0.13     | -0.19         | 0.2          | -0.41   | -0.38    | 182.18 | 57.36     | -0.41     | -0.4         | -0.42          |
|             | Run2_MDS20  | -0.31        | 0.78         | 0.27 | 1.09 | 1.62    | 4.98              | 4.32         | 1.32              | 0.91             | -0.32         | -0.31      | -0.33          | -0.32       | -0.13            | -0.36         | -0.29             | -0.25     | 0.07          | 1.13         | -0.42   | -0.38    | 59.07  | 153.65    | -0.37     | -0.41        | -0.42          |
| Run2_MDS28* | -0.16       | 1.39         | 0.81         | 1.3  | 1.42 | 3.54    | 3.68              | 1.83         | 2.12              | -0.27            | -0.22         | -0.17      | -0.22          | -0.04       | -0.39            | -0.25         | 0.35              | 0.29      | 0.06          | -0.42        | -0.35   | 60.26    | 60.57  | -0.34     | -0.43     | -0.42        |                |
| Run2_MDS5   | -0.22       | 2.02         | 0.76         | 1.39 | 1.88 | 1.34    | 0.16              | 0.84         | 0.25              | -0.05            | -0.18         | -0.14      | -0.22          | 0.06        | -0.37            | -0.25         | -0.06             | -0.24     | 0.65          | -0.39        | -0.4    | 62.38    | 50.96  | -0.4      | -0.38     | -0.39        |                |
| ICUS        | Run1_ICUS18 | -0.33        | 1.23         | 1.67 | 1.39 | 1.84    | 5.24              | 4.08         | 1.13              | 0.46             | -0.28         | -0.26      | -0.31          | -0.34       | -0.39            | -0.43         | -0.28             | -0.26     | 0             | -0.08        | -0.44   | -0.44    | 214.64 | 51.07     | -0.41     | -0.46        | -0.47          |
|             | Run1_ICUS22 | -0.25        | 1.59         | 1.56 | 1.26 | 2       | 4.81              | 5.27         | 1.58              | 0.99             | -0.32         | -0.25      | -0.23          | -0.31       | -0.38            | -0.39         | -0.23             | 0.13      | 0.2           | -0.14        | -0.45   | -0.4     | 72.46  | 268.83    | -0.29     | -0.43        | -0.46          |
|             | Run1_ICUS24 | -0.33        | 1.32         | 1.1  | 1.36 | 2.09    | 3.52              | 3.54         | 1.25              | 0.64             | -0.32         | -0.29      | -0.36          | -0.38       | -0.39            | -0.46         | -0.34             | 0.83      | 0.89          | -0.09        | -0.47   | -0.45    | 135.65 | 33.64     | -0.39     | -0.48        | -0.46          |
| Normal      | Run1_N1-1   | -0.33        | 0.75         | 1.03 | 0.53 | 1.03    | 3.49              | 4.57         | 2.31              | 0.92             | -0.37         | -0.35      | -0.34          | -0.37       | -0.38            | -0.4          | -0.31             | 0.3       | 0.37          | 0.52         | -0.48   | -0.43    | 143.79 | 59.29     | -0.37     | -0.47        | -0.48          |
|             | Run1_N1-3   | -0.28        | 0.71         | 0.56 | 0.62 | 1.35    | 4.17              | 3.08         | 1.09              | 0.55             | -0.28         | -0.26      | -0.27          | -0.32       | -0.34            | -0.43         | -0.24             | 0.17      | 0.3           | 0.2          | -0.48   | -0.43    | 117.66 | 90.76     | -0.41     | -0.48        | -0.47          |
|             | Run1_N1-4   | -0.31        | 1.39         | 1.88 | 1.22 | 1.89    | 4.58              | 4.39         | 1.69              | 0.7              | -0.33         | -0.31      | -0.32          | -0.33       | -0.27            | -0.43         | -0.25             | 0.25      | 0.23          | 0.69         | -0.48   | -0.42    | 140.95 | 58.02     | -0.46     | -0.47        | -0.49          |
|             | Run1_N1-6   | -0.22        | 0.87         | 0.86 | 0.76 | 1.2     | 2.15              | 2.24         | 1.18              | 1.09             | -0.34         | -0.22      | -0.21          | -0.22       | -0.36            | -0.45         | -0.24             | 0.79      | 3.92          | 0.36         | -0.47   | -0.44    | 112.56 | 103.66    | -0.41     | -0.49        | -0.46          |
|             | Run2_N1-3   | -0.26        | 0.88         | 0.77 | 0.78 | 1.15    | 3.06              | 1.75         | 0.5               | 0.29             | -0.27         | -0.27      | -0.27          | -0.29       | -0.31            | -0.41         | -0.26             | 0.07      | 0.17          | 0.26         | -0.43   | -0.39    | 99.95  | 77.94     | -0.36     | -0.43        | -0.43          |
|             | Run2_N1-4   | -0.27        | 1.1          | 0.65 | 0.9  | 1.45    | 3.53              | 2.53         | 0.64              | 0.44             | -0.29         | -0.31      | -0.29          | -0.28       | -0.3             | -0.39         | -0.26             | 0.11      | 0.07          | 0.76         | -0.43   | -0.41    | 125.34 | 52.12     | -0.38     | -0.42        | -0.43          |
| Run2_N1-5   | -0.27       | 0.72         | 0.83         | 0.76 | 0.82 | 1.83    | 1.12              | 0.19         | 0.03              | -0.28            | -0.25         | -0.25      | -0.27          | -0.31       | -0.4             | -0.29         | -0.03             | -0.08     | 0.04          | -0.42        | -0.41   | 98.78    | 76.69  | -0.39     | -0.42     | -0.43        |                |
| Run2_N1-6   | -0.21       | 0.69         | 0.71         | 0.57 | 0.98 | 1.74    | 1.39              | 0.68         | 0.77              | -0.3             | -0.23         | -0.22      | -0.22          | -0.31       | -0.41            | -0.31         | 0.44              | 2.96      | -0.02         | -0.4         | -0.42   | 102.72   | 125.15 | -0.25     | -0.42     | -0.39        |                |

Supplemental Table 3: Median expression of each surface marker on each cell population.

|             |             | CD3 Median |              |       |       |         |                   |              |                   |                  |               |            |                |             |                  |               |                   |           |               |              |         |          |       |           |           |              |                |       |
|-------------|-------------|------------|--------------|-------|-------|---------|-------------------|--------------|-------------------|------------------|---------------|------------|----------------|-------------|------------------|---------------|-------------------|-----------|---------------|--------------|---------|----------|-------|-----------|-----------|--------------|----------------|-------|
|             |             | Ungated    | CD34-CD38low | HSCs  | MPP   | CMP/GMP | Myelo/Mono-Blasts | ProMonocytes | CD14neg Monocytes | Mature Monocytes | ProMyelocytes | Myelocytes | MetaMyelocytes | MatureGrans | ProErythroblasts | Erythroblasts | LateErythroblasts | PreBCells | Mature Bcells | Plasma Cells | T cells | NK cells | pDCs  | Basophils | Platelets | CD8+ T cells | CD8neg T cells |       |
| AML/RAEB-T  | Run1_MDS17  | -0.41      | -0.49        | -0.5  | -0.49 | -0.48   | -0.51             | -0.45        | -0.46             | -0.4             | -0.47         | -0.47      | -0.44          | -0.41       | -0.5             | -0.5          | -0.47             | -0.39     | -0.48         | -0.46        | 35.58   | -0.41    | -0.42 | -0.45     | -0.47     | 34.44        | 37.48          |       |
|             | Run2_MDS15* | -0.4       | -0.43        | -0.45 | -0.42 | -0.46   | -0.44             | -0.43        | -0.41             | -0.4             | -0.42         | -0.43      | -0.41          | -0.39       | -0.41            | -0.34         | -0.4              | -0.4      | -0.39         | -0.56        | 33.57   | -0.4     | -0.39 | -0.45     | -0.44     | 34.15        | 32.61          |       |
|             | Run2_MDS4   | -0.3       | -0.43        | -0.43 | -0.41 | -0.42   | -0.44             | -0.45        | -0.43             | -0.47            | -0.45         | -0.46      | -0.44          | -0.42       | -0.48            | -0.44         | -0.45             | -0.31     | -0.43         | -0.4         | 14.81   | -0.13    | -0.45 | -0.45     | -0.38     | 34.24        | 35.48          |       |
| Higher Risk | Run1_MDS21  | -0.28      | -0.49        | -0.52 | -0.49 | -0.5    | -0.5              | -0.49        | -0.43             | -0.38            | -0.46         | -0.43      | -0.45          | -0.43       | -0.49            | -0.44         | -0.37             | -0.38     | -0.41         | -0.45        | 23.25   | -0.37    | -0.47 | -0.52     | -0.46     | 24.78        | 22.51          |       |
|             | Run1_MDS3   | -0.31      | -0.51        | -0.52 | -0.54 | -0.51   | -0.52             | -0.47        | -0.45             | -0.52            | -0.47         | -0.48      | -0.45          | -0.44       | -0.51            | -0.45         | -0.4              | -0.43     | -0.45         | -0.32        | 31.68   | -0.49    | 0.34  | -0.57     | -0.49     | 30.79        | 32.23          |       |
|             | Run2_MDS13  | -0.29      | -0.46        | -0.45 | -0.45 | -0.44   | -0.44             | -0.45        | -0.41             | -0.37            | -0.42         | -0.41      | -0.42          | -0.42       | -0.41            | -0.44         | -0.4              | -0.32     | -0.4          | -0.4         | 20.04   | -0.4     | -0.32 | -0.41     | -0.43     | 20.37        | 19.86          |       |
|             | Run2_MDS16  | -0.28      | -0.44        | -0.45 | -0.45 | -0.36   | -0.41             | -0.52        | -0.46             | -0.42            | -0.43         | -0.45      | -0.43          | -0.43       | -0.44            | -0.44         | -0.39             | 18.59     | -0.43         | -0.35        | 25.96   | -0.39    | -0.4  | -0.42     | -0.44     | 22.78        | 26.85          |       |
|             | Run2_MDS1   | -0.29      | -0.38        | -0.41 | -0.45 | -0.43   | -0.46             | -0.41        | -0.45             | -0.44            | -0.45         | -0.46      | -0.43          | -0.44       | -0.45            | -0.45         | -0.43             | -0.09     | -0.43         | -0.39        | 17.77   | -0.43    | -0.48 | -0.38     | -0.38     | 15.93        | 18.17          |       |
|             | Run2_MDS21  | -0.28      | -0.45        | -0.44 | -0.45 | -0.43   | -0.43             | -0.49        | -0.43             | -0.46            | -0.41         | -0.42      | -0.42          | -0.42       | -0.41            | -0.43         | -0.43             | -0.43     | -0.35         | -0.43        | -0.44   | 14.85    | -0.07 | -0.56     | -0.46     | -0.43        | 15.95          | 14.24 |
|             | Run2_MDS26* | -0.41      | -0.4         | -0.41 | -0.42 | -0.43   | -0.43             | -0.38        | -0.41             | -0.31            | -0.43         | -0.43      | -0.42          | -0.41       | -0.44            | -0.44         | -0.43             | -0.21     | -0.4          | -0.4         | 20.13   | -0.36    | -0.54 | -0.43     | -0.42     | 17.17        | 22.33          |       |
|             | Run2_MDS27  | -0.28      | -0.44        | -0.45 | -0.43 | -0.46   | -0.43             | -0.43        | -0.4              | -0.4             | -0.44         | -0.42      | -0.44          | -0.42       | -0.44            | -0.44         | -0.43             | 8.73      | -0.42         | -0.45        | 17.31   | -0.38    | -0.42 | -0.4      | -0.31     | 15.66        | 19.75          |       |
|             | Run2_MDS2   | -0.3       | -0.47        | -0.51 | -0.48 | -0.48   | -0.43             | -0.43        | -0.42             | -0.44            | -0.34         | -0.42      | -0.44          | -0.42       | -0.22            | -0.28         | -0.44             | -0.03     | -0.25         | -0.39        | 11.84   | -0.3     | -0.46 | -0.46     | -0.46     | 11.06        | 11.87          |       |
|             | Run2_MDS3   | -0.28      | -0.44        | -0.45 | -0.45 | -0.45   | -0.44             | -0.5         | -0.42             | -0.41            | -0.42         | -0.4       | -0.41          | -0.35       | -0.45            | -0.45         | -0.43             | -0.33     | -0.42         | -0.48        | 20.41   | -0.38    | -0.58 | -0.39     | -0.47     | 19.86        | 20.71          |       |
| Lower Risk  | Run1_MDS23  | -0.39      | -0.48        | -0.4  | -0.46 | -0.46   | -0.47             | -0.45        | -0.42             | -0.4             | -0.42         | -0.45      | -0.44          | -0.43       | -0.49            | -0.48         | -0.41             | -0.24     | -0.43         | -0.44        | 46.71   | -0.39    | -0.48 | -0.46     | -0.44     | 40.62        | 49.42          |       |
|             | Run1_MDS25  | -0.41      | -0.21        | -0.73 | -0.65 | -0.29   | -0.48             | -0.46        | -0.47             | -0.44            | -0.48         | -0.48      | -0.49          | -0.47       | -0.5             | -0.49         | -0.33             | -0.06     | -0.47         | -0.46        | 30.43   | -0.46    | -0.51 | -0.51     | -0.48     | 28.32        | 32.87          |       |
|             | Run1_MDS5   | -0.38      | -0.56        | -0.75 | -0.47 | -0.71   | -0.57             | -0.55        | -0.43             | -0.4             | -0.53         | -0.45      | -0.43          | -0.42       | -0.32            | -0.44         | -0.38             | -0.22     | -0.44         | -0.49        | 36.12   | -0.43    | -0.43 | -0.47     | -0.46     | 34.78        | 36.57          |       |
|             | Run1_MDS6   | -0.36      | -0.47        | -0.46 | -0.46 | -0.51   | -0.44             | -0.4         | -0.44             | -0.42            | -0.48         | -0.48      | -0.44          | -0.43       | -0.41            | -0.47         | -0.41             | -0.11     | -0.41         | -0.44        | 40.31   | -0.43    | -0.42 | -0.47     | -0.46     | 39.03        | 41.52          |       |
|             | Run1_MDS8   | -0.34      | -0.28        | -0.11 | -0.36 | -0.45   | -0.45             | -0.41        | -0.38             | -0.38            | -0.47         | -0.5       | -0.46          | -0.43       | -0.48            | -0.45         | -0.43             | 1.93      | -0.38         | -0.38        | 24.66   | -0.42    | -0.32 | -0.39     | -0.5      | 25.74        | 24.25          |       |
|             | Run1_MDS9   | -0.27      | -0.46        | -0.46 | -0.46 | -0.47   | -0.48             | -0.44        | -0.4              | -0.33            | -0.46         | -0.48      | -0.45          | -0.43       | -0.45            | -0.5          | -0.39             | 16.52     | -0.4          | -0.39        | 28.28   | -0.41    | -0.37 | -0.45     | -0.47     | 26.41        | 29.68          |       |
|             | Run2_MDS12  | -0.4       | -0.39        | -0.47 | -0.35 | -0.45   | -0.41             | -0.41        | -0.41             | -0.37            | -0.41         | -0.43      | -0.41          | -0.4        | -0.44            | -0.45         | -0.43             | -0.3      | -0.41         | -0.6         | 20.23   | -0.35    | -0.41 | -0.44     | -0.42     | 20.83        | 19.91          |       |
|             | Run2_MDS14  | -0.39      | -0.29        | -0.2  | -0.19 | -0.46   | -0.42             | -0.41        | -0.44             | -0.41            | -0.42         | -0.45      | -0.42          | -0.43       | -0.47            | -0.45         | -0.43             | -0.32     | -0.43         | -0.55        | 20.33   | -0.4     | -0.36 | -0.46     | -0.46     | 16.76        | 21.08          |       |
|             | Run2_MDS19  | -0.37      | -0.46        | -0.51 | -0.45 | -0.45   | -0.43             | -0.42        | -0.42             | -0.41            | -0.43         | -0.43      | -0.42          | -0.41       | -0.45            | -0.44         | -0.42             | 0.63      | -0.39         | -0.41        | 23.58   | -0.38    | -0.44 | -0.41     | -0.4      | 22.59        | 23.97          |       |
|             | Run2_MDS20  | -0.2       | -0.33        | -0.43 | -0.32 | -0.61   | -0.43             | -0.44        | -0.43             | -0.41            | -0.44         | -0.45      | -0.44          | -0.42       | -0.41            | -0.4          | -0.43             | 24.8      | -0.43         | -0.53        | 34.54   | -0.42    | -0.47 | -0.43     | -0.45     | 28.42        | 35.29          |       |
| Run2_MDS28* | -0.35       | -0.41      | -0.4         | -0.38 | -0.42 | -0.4    | -0.4              | -0.38        | -0.42             | -0.43            | -0.4          | -0.38      | -0.4           | -0.4        | -0.43            | -0.4          | -0.11             | -0.41     | -0.42         | 29.69        | -0.38   | -0.39    | -0.39 | -0.39     | 26.6      | 33.15        |                |       |
| Run2_MDS5   | -0.36       | -0.5       | -0.87        | -0.55 | -0.75 | -0.4    | -0.39             | -0.4         | -0.38             | -0.41            | -0.42         | -0.41      | -0.39          | -0.33       | -0.4             | -0.35         | -0.14             | -0.38     | -0.48         | 28.46        | -0.37   | -0.43    | -0.33 | -0.42     | 28.01     | 28.81        |                |       |
| ICUS        | Run1_ICUS18 | -0.34      | -0.37        | -0.3  | -0.37 | -0.46   | -0.5              | -0.45        | -0.45             | -0.43            | -0.46         | -0.46      | -0.44          | -0.48       | -0.45            | -0.39         | 0.97              | -0.49     | -0.42         | 39.16        | -0.44   | -0.42    | -0.45 | -0.45     | 31.46     | 40.97        |                |       |
|             | Run1_ICUS22 | -0.36      | -0.4         | -0.3  | -0.45 | -0.51   | -0.45             | -0.4         | -0.44             | -0.4             | -0.45         | -0.47      | -0.45          | -0.42       | -0.46            | -0.46         | -0.35             | -0.31     | -0.45         | -0.34        | 34.68   | -0.42    | -0.41 | -0.48     | -0.4      | 32.61        | 35.4           |       |
|             | Run1_ICUS24 | -0.34      | -0.5         | -0.49 | -0.56 | -0.48   | -0.47             | -0.41        | -0.43             | -0.39            | -0.45         | -0.47      | -0.45          | -0.43       | -0.48            | -0.47         | -0.41             | -0.39     | -0.45         | -0.44        | 36.41   | -0.42    | -0.43 | -0.43     | -0.45     | 35.33        | 37.31          |       |
| Normal      | Run1_NI-1   | -0.39      | -0.44        | -0.42 | -0.37 | -0.4    | -0.48             | -0.42        | -0.45             | -0.43            | -0.48         | -0.5       | -0.47          | -0.44       | -0.5             | -0.48         | -0.36             | -0.43     | -0.46         | -0.51        | 46.33   | -0.41    | -0.43 | -0.45     | -0.44     | 43.35        | 48.14          |       |
|             | Run1_NI-3   | -0.36      | -0.51        | -0.66 | -0.43 | -0.49   | -0.48             | -0.43        | -0.38             | -0.37            | -0.47         | -0.46      | -0.44          | -0.42       | -0.45            | -0.49         | -0.39             | -0.27     | -0.46         | -0.33        | 38.82   | -0.42    | -0.49 | -0.5      | -0.47     | 33.67        | 42.8           |       |
|             | Run1_NI-4   | -0.39      | -0.45        | -0.35 | -0.59 | -0.46   | -0.46             | -0.44        | -0.41             | -0.41            | -0.49         | -0.48      | -0.45          | -0.44       | -0.51            | -0.51         | -0.41             | -0.33     | -0.46         | -0.54        | 35.34   | -0.44    | -0.49 | -0.51     | -0.43     | 33.54        | 36.84          |       |
|             | Run1_NI-5   | -0.4       | -0.46        | -0.49 | -0.46 | -0.51   | -0.46             | -0.39        | -0.39             | -0.41            | -0.45         | -0.46      | -0.43          | -0.41       | -0.46            | -0.48         | -0.4              | -0.41     | -0.44         | -0.48        | 34.97   | -0.41    | -0.43 | -0.49     | -0.35     | 31.02        | 36.74          |       |
|             | Run2_NI-3   | -0.36      | -0.41        | -0.46 | -0.41 | -0.44   | -0.43             | -0.41        | -0.37             | -0.38            | -0.43         | -0.41      | -0.39          | -0.45       | -0.45            | -0.4          | -0.4              | -0.27     | -0.42         | -0.46        | 31.31   | -0.41    | -0.45 | -0.43     | -0.44     | 26.76        | 34.69          |       |
|             | Run2_NI-4   | -0.35      | -0.41        | -0.46 | -0.3  | -0.41   | -0.42             | -0.39        | -0.38             | -0.37            | -0.42         | -0.43      | -0.4           | -0.39       | -0.42            | -0.43         | -0.4              | -0.31     | -0.43         | -0.44        | 28.14   | -0.38    | -0.41 | -0.44     | -0.4      | 26.88        | 29.57          |       |
| Run2_NI-5   | -0.35       | -0.43      | -0.47        | -0.35 | -0.44 | -0.42   | -0.39             | -0.39        | -0.37             | -0.43            | -0.42         | -0.41      | -0.4           | -0.42       | -0.44            | -0.4          | -0.39             | -0.42     | -0.41         | 28.76        | -0.38   | -0.45    | -0.47 | -0.43     | 25.75     | 31.82        |                |       |
| Run2_NI-6   | -0.38       | -0.4       | -0.54        | -0.43 | -0.42 | -0.42   | -0.41             | -0.4         | -0.38             | -0.41            | -0.42         | -0.4       | -0.39          | -0.41       | -0.42            | -0.41         | -0.39             | -0.42     | -0.5          | 25.88        | -0.38   | -0.39    | -0.45 | -0.47     | 23.07     | 27.02        |                |       |

Supplemental Table 9: Median expression of each surface marker on each cell population.

|             |             | CD45 Median |              |       |       |         |                   |              |                   |                  |               |            |                |             |                  |               |                   |           |               |              |         |          |        |           |           |              |                |        |
|-------------|-------------|-------------|--------------|-------|-------|---------|-------------------|--------------|-------------------|------------------|---------------|------------|----------------|-------------|------------------|---------------|-------------------|-----------|---------------|--------------|---------|----------|--------|-----------|-----------|--------------|----------------|--------|
|             |             | Ungated     | CD34-CD38low | HSCs  | MPP   | CMP/GMP | Myelo/Mono-Blasts | ProMonocytes | CD14neg Monocytes | Mature Monocytes | ProMyelocytes | Myelocytes | MetaMyelocytes | MatureGrans | ProErythroblasts | Erythroblasts | LateErythroblasts | PreBCells | Mature Bcells | Plasma Cells | T cells | NK cells | pDCs   | Basophils | Platelets | CD8+ T cells | CD8neg T cells |        |
| AML/RAEB-T  | Run1_MDS17  | 10.44       | 2.62         | 2.79  | 2.45  | 3.21    | 2.44              | 28.28        | 92.13             | 108.63           | 6.59          | 10.7       | 40.57          | 56.4        | -0.19            | -0.46         | -0.07             | 24.94     | 81.86         | 8.33         | 138.42  | 139.49   | 3.05   | 27.17     | 3.3       | 154.11       | 119.71         |        |
|             | Run2_MDS15* | 26.54       | 6.27         | 3.34  | 3.28  | 5.2     | 6.16              | 12.87        | 64.92             | 82.56            | 5.5           | 10.92      | 31.54          | 54.08       | 11.36            | 12.44         | 46.32             | 55.12     | 86.8          | 29.93        | 137.12  | 132.2    | 13.16  | 19.14     | 4.18      | 165.64       | 114.11         |        |
|             | Run2_MDS4   | 31.47       | 5.98         | 8.54  | 4.77  | 3.86    | 6.56              | 28.59        | 47.59             | 54.98            | 4.63          | 8.87       | 32.31          | 47.21       | -0.23            | -0.62         | -0.13             | 11.38     | 10.25         | 1.59         | 85.19   | 75.24    | 10.73  | 19.69     | 3.44      | 104.97       | 71.23          |        |
|             | Run1_MDS21  | 9.27        | 2.21         | 2.19  | 2.03  | 2.25    | 2.26              | 11.33        | 91.7              | 101.34           | 3.13          | 10.27      | 53.48          | 78.91       | -0.24            | -0.04         | 10.33             | 58.87     | 79.07         | 1.14         | 90.08   | 106.15   | 11.79  | 27.6      | 3.29      | 122.4        | 81.73          |        |
| Higher Risk | Run1_MDS3   | 9.57        | 3.15         | 2.97  | 2.77  | 3.44    | 3.64              | 11.91        | 83.57             | 112.65           | 4.16          | 10.64      | 47.46          | 68.93       | -0.12            | 0             | 6.78              | 68.56     | 92.05         | 3.24         | 117.48  | 137.09   | 89.34  | 27.26     | 2.53      | 143.57       | 108.69         |        |
|             | Run2_MDS13  | 10.34       | 1.74         | 1.73  | 1.53  | 1.98    | 2.23              | 32.45        | 67.05             | 69.25            | 5.28          | 9.51       | 31.05          | 39.44       | 0.69             | -0.23         | -0.06             | 41.66     | 54.28         | 20.36        | 87.1    | 87.81    | 24.73  | 15.98     | 2.05      | 111.42       | 78.01          |        |
|             | Run2_MDS16  | 29.58       | 12.52        | 12.72 | 11.24 | 8.03    | 32.74             | 78.09        | 70.7              | 85.64            | 4.13          | 7.96       | 19.67          | 29.62       | 6.55             | -0.28         | 17.04             | 69.82     | 56.22         | 4.27         | 77.37   | 122.85   | 18.03  | 20.4      | 0.7       | 83.5         | 76.08          |        |
|             | Run2_MDS1   | 32.84       | 4.52         | 6.56  | 2.69  | 3.55    | 5.86              | 22.83        | 51.94             | 72.13            | 2.51          | 7.09       | 28.8           | 37.99       | 0.53             | -0.26         | -0.19             | 55.39     | 48.1          | 3.22         | 66.03   | 91.44    | 15.09  | 11.89     | 1.16      | 86.79        | 62.79          |        |
|             | Run2_MDS21  | 6.28        | 0.83         | 1.06  | 0.78  | 0.94    | 0.88              | 14.62        | 55.58             | 59.19            | 3.48          | 5.9        | 24.08          | 33.1        | -0.28            | -0.39         | -0.25             | 39.19     | 54.48         | 1.07         | 68.51   | 70.07    | 2.28   | 14.78     | 1.42      | 94           | 61.62          |        |
|             | Run2_MDS26* | 11.88       | 5.98         | 6.35  | 5.7   | 4.12    | 1.68              | 12.22        | 78.42             | 85.35            | 2.01          | 4.84       | 21.93          | 33.18       | 1.24             | -0.4          | -0.39             | 122.2     | 36.93         | 0.23         | 79.7    | 87.14    | 19.54  | 19.33     | 2.18      | 99.23        | 70.9           |        |
|             | Run2_MDS27  | 23.81       | 11.09        | 13.2  | 9.17  | 7.68    | 8.44              | 37.88        | 57.5              | 85.41            | 3.79          | 6.02       | 20.51          | 36.6        | 6.25             | -0.28         | -0.26             | 74.84     | 54.51         | 3.59         | 98.6    | 106.87   | 129.4  | 22.43     | 2.25      | 106.97       | 89.87          |        |
|             | Run2_MDS2   | 30.33       | 0.45         | 0.73  | 0.27  | 0.44    | 1.1               | 26.64        | 40.96             | 61.16            | 2.38          | 6.65       | 29.31          | 34.94       | 32.39            | 23.4          | 3.17              | 34.48     | 86.21         | 3.64         | 48.96   | 63.79    | 24.8   | 7.23      | -0.22     | 71.67        | 47.92          |        |
|             | Run2_MDS3   | 9.23        | 1.51         | 1.54  | 1.35  | 1.61    | 1.94              | 21.96        | 57.46             | 62.47            | 6.01          | 9.16       | 24.66          | 34.56       | 0.18             | -0.29         | -0.27             | 49.57     | 66.62         | 2.89         | 90.64   | 99.58    | 11.81  | 15.95     | 1.87      | 114.14       | 82.91          |        |
|             | Lower Risk  | Run1_MDS23  | 41.94        | 11.02 | 12.6  | 9.61    | 7.89              | 13.58        | 62.89             | 130.62           | 169.73        | 4.54       | 8.79           | 36.71       | 64.14            | 0.38          | 0.32              | 43.35     | 87.52         | 67.09        | 1.28    | 122.84   | 176.88 | 27.65     | 37.12     | 2.58         | 177.91         | 109.02 |
| Run1_MDS25  |             | 69.42       | 51.49        | 4.68  | 56.9  | 6.25    | 63.98             | 74.3         | 101.83            | 118.93           | 6.46          | 14.63      | 52.19          | 68.31       | 1.08             | 2.16          | 79.63             | 104.49    | 92.13         | 10.14        | 128.59  | 141.6    | 34.11  | 35.58     | 1.52      | 148.31       | 113.19         |        |
| Run1_MDS5   |             | 110.26      | 42.09        | 24.82 | 44.67 | 21.25   | 26.67             | 101.66       | 132.04            | 156.91           | 16.51         | 54.08      | 96.65          | 117.62      | 52.7             | 0.92          | 17.87             | 126.03    | 84.03         | 23.07        | 148.58  | 193.7    | 62.19  | 36.26     | 1.53      | 203.43       | 133.87         |        |
| Run1_MDS6   |             | 49.93       | 14.27        | 12.05 | 11.89 | 11.78   | 16.47             | 78.86        | 105.28            | 136.31           | 7.08          | 13.57      | 34.56          | 53.45       | 6.1              | -0.16         | 35.51             | 89.56     | 112.73        | 10.91        | 137.21  | 175.5    | 49     | 43.79     | 3.96      | 158.89       | 123.54         |        |
| Run1_MDS8   |             | 61.94       | 20.38        | 16.81 | 19.58 | 10.56   | 12.68             | 200.77       | 170.22            | 174.34           | 7.02          | 15.5       | 50.07          | 63.75       | 1.2              | 0.39          | 4.25              | 83.17     | 82.7          | 7.89         | 82.2    | 124.46   | 36.81  | 38.82     | 1.54      | 92.56        | 79.52          |        |
| Run1_MDS9   |             | 57.61       | 11.81        | 14.71 | 9.25  | 12.19   | 14.69             | 172.61       | 150.44            | 139.07           | 5.94          | 12.55      | 42.02          | 12.19       | 1.3              | 0.53          | 23.76             | 95.23     | 79.27         | 5.28         | 97.31   | 152.59   | 134.29 | 34.88     | 1.88      | 132.31       | 86             |        |
| Run2_MDS12  |             | 36          | 9.61         | 9.67  | 8.88  | 9       | 24.72             | 42.32        | 69.42             | 95.43            | 3.52          | 7.99       | 36.51          | 57.81       | -0.15            | -0.44         | 2.3               | 48.47     | 80.16         | 1.21         | 82.87   | 121.28   | 23.84  | 29.21     | 2.42      | 120.53       | 67.83          |        |
| Run2_MDS14  |             | 28.14       | 12.1         | 10.17 | 35.33 | 4.69    | 48.4              | 139.63       | 74.39             | 103.8            | 3.46          | 5.83       | 14.57          | 28.46       | 0.5              | -0.32         | 27.1              | 17.62     | 59.05         | 1.08         | 94.55   | 126.74   | 16.3   | 15.06     | 2.62      | 107.05       | 89.37          |        |
| Run2_MDS19  |             | 25.82       | 12.47        | 14.5  | 11.86 | 6.64    | 21.52             | 48.21        | 62.31             | 87.09            | 3.58          | 7.7        | 21.8           | 32.45       | -0.05            | -0.39         | -0.18             | 76.14     | 69.99         | 0.49         | 97.77   | 101.95   | 18.54  | 19.34     | 1.28      | 122.92       | 91.74          |        |
| Run2_MDS20  |             | 51.48       | 15.59        | 17.71 | 17.68 | 8.16    | 81.17             | 133.51       | 115.52            | 110.88           | 4.47          | 7.78       | 24.3           | 38.98       | 3.41             | 0.34          | 36.22             | 104.98    | 84.51         | 8.16         | 112.37  | 108.33   | 101.12 | 23.51     | 1.61      | 130.84       | 110.49         |        |
| Run2_MDS28* | 46.51       | 6.51        | 11.8         | 5.55  | 6.06  | 13.19   | 35.94             | 84.53        | 128.95            | 4.17             | 6.73          | 30.3       | 59.55          | 1.69        | -0.27            | 38.36         | 92.15             | 59.16     | -0.24         | 102.29       | 127.16  | 82.24    | 24.22  | 2.15      | 123.55    | 87.64        |                |        |
| Run2_MDS5   | 78.43       | 47.41       | 23.74        | 22.7  | 15.21 | 27.62   | 90.43             | 112.04       | 109.46            | 13.66            | 41.21         | 67.46      | 80.43          | 22.54       | 0.1              | 66.79         | 97.93             | 68.16     | 19.8          | 124.31       | 158.91  | 44.96    | 29.34  | 1.37      | 171.38    | 112.38       |                |        |
| ICUS        | Run1_ICUS18 | 63.94       | 20.66        | 23.19 | 15.04 | 11.56   | 79.14             | 118.26       | 129.29            | 142.58           | 5.1           | 9.73       | 34.04          | 59.71       | 0.94             | 0.29          | 70.8              | 108.42    | 78.52         | 0.94         | 107.91  | 161.31   | 44.33  | 32.15     | 2.6       | 133.91       | 103.77         |        |
|             | Run1_ICUS22 | 74.42       | 17.04        | 21.54 | 15.78 | 10.34   | 45.14             | 143.7        | 150.25            | 178.21           | 5.76          | 10.13      | 38.9           | 77.62       | 0.97             | 0.8           | 81.31             | 39.43     | 77.52         | 1.06         | 121.8   | 137.77   | 172.65 | 29.25     | 2.6       | 155.35       | 112.02         |        |
|             | Run1_ICUS24 | 55.1        | 15.99        | 21.05 | 14.07 | 10.12   | 21.51             | 56.81        | 102.93            | 133.42           | 6.26          | 10.72      | 35.17          | 65.25       | 0.56             | -0.2          | 16.29             | 22.22     | 77.22         | 0.43         | 114.2   | 136.91   | 23.66  | 24.98     | 6.4       | 123.65       | 108.2          |        |
|             | Run1_ICUS2  | 66.44       | 18.95        | 19.41 | 17.18 | 10.86   | 26.62             | 109.28       | 116.03            | 181.78           | 8.05          | 13.02      | 38.76          | 77.91       | 0.78             | 0.28          | 67.9              | 21.09     | 69.05         | 2.58         | 111.92  | 173.51   | 39.93  | 31.23     | 6.81      | 118.64       | 108.56         |        |
| Normal      | Run1_N1-1   | 42.6        | 18.36        | 19.19 | 19.03 | 11.15   | 22.74             | 57.11        | 94.87             | 153.67           | 7.61          | 13.82      | 34.72          | 53.65       | 2.88             | 0.39          | 51.84             | 42.9      | 71.94         | 2.4          | 115.15  | 158.93   | 33.36  | 36.36     | 1.67      | 130.29       | 106.91         |        |
|             | Run1_N1-3   | 45.32       | 16.67        | 16.32 | 16.24 | 10.98   | 20.87             | 50.53        | 144.99            | 7.74             | 14.49         | 39.52      | 56.62          | 4.4         | 0.65             | 54.26         | 47.21             | 84.37     | 6.68          | 125.76       | 154.39  | 30.08    | 30.78  | 2.37      | 132.42    | 121.5        |                |        |
|             | Run1_N1-6   | 40.01       | 17.31        | 19.48 | 15.19 | 8.8     | 15.61             | 51.54        | 94.2              | 137.68           | 6.12          | 11.95      | 34.44          | 61.29       | 1.2              | -0.13         | 46.78             | 21.16     | 59.58         | 3.37         | 113.24  | 159.99   | 32.54  | 29.8      | 1.97      | 123.38       | 110.06         |        |
|             | Run2_N1-3   | 27.69       | 13.82        | 16.04 | 12.28 | 7.94    | 17.99             | 46.37        | 80.62             | 115.98           | 5.89          | 10.61      | 25.91          | 35.85       | 1.01             | 0.1           | 32.03             | 30.6      | 58.92         | 1.6          | 97.11   | 122.84   | 25.64  | 25.33     | 1.24      | 110.15       | 90.6           |        |
|             | Run2_N1-4   | 27.24       | 13.67        | 16.16 | 14.51 | 7.72    | 16.46             | 39.89        | 72.38             | 94.69            | 6.04          | 10.48      | 25.92          | 33.91       | 2.11             | 0.16          | 30.97             | 32.1      | 68.05         | 6.04         | 108.47  | 122.84   | 21.35  | 21.41     | 1.78      | 113.92       | 104.66         |        |
|             | Run2_N1-5   | 32.14       | 12.45        | 13.17 | 11.13 | 6.93    | 17.36             | 44.18        | 88.47             | 110.09           | 4.87          | 9.42       | 27.83          | 39.93       | 2.55             | -0.11         | 35.05             | 16.28     | 58.7          | 1.78         | 103.59  | 149.72   | 23.64  | 23.4      | 1.84      | 106.18       | 100.81         |        |
|             | Run2_N1-6   | 24.49       | 11.57        | 13.55 | 11.45 | 6.1     | 11.22             | 39.22        | 71.58             | 92.94            | 4.12          | 7.89       | 22.91          | 34.18       | 0.33             | -0.29         | 17.99             | 14.57     | 45.61         | 2.89         | 94.18   | 129.34   | 22.21  | 18.19     | 2.05      | 104.52       | 90.85          |        |

Supplemental Table 3: Median expression of each surface marker on each cell population.

|             |             | CD133 Median |              |       |       |         |                   |              |                   |                  |               |            |                |             |                  |               |                   |           |               |              |         |          |       |           |           |              |                |
|-------------|-------------|--------------|--------------|-------|-------|---------|-------------------|--------------|-------------------|------------------|---------------|------------|----------------|-------------|------------------|---------------|-------------------|-----------|---------------|--------------|---------|----------|-------|-----------|-----------|--------------|----------------|
|             |             | Ungated      | CD14-CD38low | HSCs  | MPP   | CMP/GMP | Myelo/Mono-Blasts | ProMonocytes | CD14neg Monocytes | Mature Monocytes | ProMyelocytes | Myelocytes | MetaMyelocytes | MatureGrans | ProErythroblasts | Erythroblasts | LateErythroblasts | PreBCells | Mature Bcells | Plasma Cells | T cells | NK cells | pDCs  | Basophils | Platelets | CD8+ T cells | CD8neg T cells |
| AML/RAEB-T  | Run1_MDS17  | -0.36        | -0.22        | -0.2  | -0.24 | -0.07   | -0.35             | -0.41        | -0.43             | -0.42            | -0.43         | -0.37      | -0.37          | -0.33       | -0.3             | -0.33         | -0.37             | -0.32     | -0.34         | -0.37        | -0.45   | -0.41    | 1.12  | -0.6      | -0.42     | -0.45        | -0.44          |
|             | Run2_MDS15* | -0.23        | 1.47         | 0.93  | 0.8   | -0.07   | -0.26             | -0.33        | -0.32             | -0.33            | -0.38         | -0.36      | -0.34          | -0.32       | -0.13            | -0.06         | -0.06             | -0.28     | -0.29         | 0.01         | -0.41   | -0.39    | -0.25 | -0.27     | -0.35     | -0.35        | -0.37          |
|             | Run2_MDS4   | -0.33        | 0.13         | 0.3   | -0.08 | -0.47   | -0.33             | -0.32        | -0.32             | -0.33            | -0.38         | -0.36      | -0.34          | -0.32       | -0.27            | -0.27         | -0.33             | -0.33     | -0.29         | -0.41        | -0.39   | -0.25    | -0.27 | -0.35     | -0.35     | -0.39        | -0.4           |
| Higher Risk | Run1_MDS21  | -0.37        | -0.24        | -0.21 | -0.27 | -0.21   | -0.25             | -0.33        | -0.39             | -0.39            | -0.44         | -0.41      | -0.4           | -0.35       | -0.27            | -0.13         | -0.05             | -0.42     | -0.36         | -0.24        | -0.43   | -0.33    | -0.02 | -0.39     | -0.23     | -0.39        | -0.45          |
|             | Run1_MDS3   | -0.39        | -0.24        | -0.3  | -0.24 | -0.15   | -0.22             | -0.32        | -0.45             | -0.38            | -0.45         | -0.39      | -0.39          | -0.31       | -0.35            | -0.28         | -0.24             | -0.43     | -0.37         | -0.27        | -0.44   | -0.28    | 0.08  | -0.44     | -0.35     | -0.42        | -0.45          |
|             | Run2_MDS13  | -0.34        | -0.19        | -0.2  | -0.21 | -0.18   | -0.24             | -0.34        | -0.34             | -0.31            | -0.37         | -0.36      | -0.33          | -0.33       | -0.26            | -0.27         | -0.3              | -0.4      | -0.36         | -0.32        | -0.38   | -0.33    | -0.28 | -0.37     | -0.34     | -0.37        | -0.39          |
|             | Run2_MDS16  | -0.3         | 0.91         | 1.06  | 0.78  | 0.59    | -0.29             | -0.3         | -0.37             | -0.37            | -0.35         | -0.36      | -0.33          | -0.31       | 0.19             | -0.05         | -0.27             | -0.34     | -0.38         | -0.31        | -0.37   | -0.29    | -0.29 | -0.37     | -0.29     | -0.36        | -0.37          |
|             | Run2_MDS1   | -0.38        | -0.2         | -0.07 | -0.23 | -0.21   | -0.36             | -0.38        | -0.36             | -0.37            | -0.36         | -0.42      | -0.35          | -0.34       | -0.36            | -0.24         | -0.32             | -0.35     | -0.35         | -0.26        | -0.4    | -0.35    | -0.36 | -0.31     | -0.31     | -0.39        | -0.4           |
|             | Run2_MDS21  | -0.34        | -0.24        | -0.24 | -0.24 | -0.2    | -0.25             | -0.35        | -0.32             | -0.35            | -0.37         | -0.34      | -0.35          | -0.32       | -0.31            | -0.3          | -0.32             | -0.37     | -0.31         | -0.14        | -0.39   | -0.35    | 0.77  | -0.45     | -0.26     | -0.38        | -0.39          |
|             | Run2_MDS26* | -0.4         | -0.19        | -0.18 | -0.2  | -0.28   | -0.36             | -0.22        | -0.38             | -0.46            | -0.41         | -0.41      | -0.4           | -0.39       | -0.29            | -0.31         | -0.37             | -0.38     | -0.36         | -0.51        | -0.39   | -0.34    | -0.24 | -0.42     | -0.48     | -0.38        | -0.39          |
| Lower Risk  | Run2_MDS27  | -0.21        | 1.14         | 1.33  | 0.92  | 0.43    | -0.16             | -0.3         | -0.37             | -0.36            | -0.36         | -0.32      | -0.31          | -0.25       | -0.14            | -0.01         | -0.34             | -0.32     | -0.37         | -0.29        | -0.38   | -0.32    | -0.39 | -0.44     | -0.1      | -0.37        | -0.38          |
|             | Run2_MDS2   | -0.36        | -0.28        | -0.28 | -0.32 | -0.24   | -0.31             | -0.28        | -0.37             | -0.3             | -0.3          | -0.36      | -0.36          | -0.34       | -0.12            | -0.12         | -0.35             | -0.48     | -0.46         | -0.34        | -0.4    | -0.37    | -0.47 | -0.43     | -0.39     | -0.33        | -0.41          |
|             | Run2_MDS3   | -0.34        | -0.21        | -0.24 | -0.21 | -0.16   | -0.22             | -0.29        | -0.36             | -0.65            | -0.36         | -0.29      | -0.29          | -0.31       | -0.27            | -0.32         | -0.36             | -0.36     | -0.37         | -0.28        | -0.39   | -0.26    | 0.14  | -0.42     | -0.31     | -0.37        | -0.4           |
| ICUS        | Run1_MDS23  | -0.38        | 0.31         | 0.55  | 0.24  | 0.38    | -0.24             | -0.3         | -0.31             | -0.32            | -0.38         | -0.41      | -0.39          | -0.38       | -0.27            | -0.17         | -0.24             | -0.37     | -0.38         | -0.46        | -0.46   | -0.36    | -0.24 | -0.5      | -0.32     | -0.43        | -0.47          |
|             | Run1_MDS25  | -0.36        | 0.56         | 3.03  | -0.68 | -0.21   | -0.24             | -0.42        | -0.41             | -0.43            | -0.44         | -0.44      | -0.38          | -0.35       | -0.24            | -0.08         | -0.05             | -0.37     | -0.23         | -0.4         | -0.42   | -0.35    | -0.32 | -0.39     | -0.37     | -0.42        | -0.42          |
|             | Run1_MDS5   | -0.31        | 1.93         | 2.44  | 0.62  | 0.43    | 0                 | -0.29        | -0.25             | -0.2             | -0.35         | -0.36      | -0.33          | -0.3        | -0.12            | 0.3           | -0.21             | -0.29     | -0.35         | -0.26        | -0.38   | -0.32    | -0.07 | -0.36     | -0.38     | -0.35        | -0.39          |
|             | Run1_MDS6   | -0.3         | 1.63         | 1.07  | 0.17  | 0.7     | -0.06             | -0.33        | -0.32             | -0.34            | -0.37         | -0.38      | -0.32          | -0.29       | 0.27             | 0.23          | -0.12             | -0.42     | -0.34         | -0.21        | -0.42   | -0.26    | -0.3  | -0.4      | -0.17     | -0.39        | -0.44          |
|             | Run1_MDS8   | -0.25        | 1.16         | 1.28  | 1.07  | 0.52    | -0.07             | -0.25        | -0.38             | -0.38            | -0.4          | -0.36      | -0.22          | -0.19       | 0.21             | 0.14          | -0.16             | -0.38     | -0.41         | -0.3         | -0.44   | -0.3     | -0.02 | -0.44     | -0.26     | -0.44        | -0.44          |
|             | Run1_MDS9   | -0.18        | 1.97         | 3.19  | 1.04  | 1.9     | 0.4               | -0.26        | -0.37             | -0.34            | -0.38         | -0.31      | -0.08          | 0.06        | 0.19             | 0.28          | 0.23              | -0.35     | -0.38         | -0.4         | -0.44   | -0.28    | -0.29 | -0.41     | -0.33     | -0.43        | -0.45          |
|             | Run2_MDS12  | -0.34        | 0.2          | 0.19  | 0     | 0.16    | -0.25             | -0.34        | -0.35             | -0.35            | -0.39         | -0.37      | -0.34          | -0.31       | -0.19            | -0.24         | -0.32             | -0.35     | -0.34         | -0.27        | -0.41   | -0.29    | -0.25 | -0.38     | -0.24     | -0.38        | -0.42          |
|             | Run2_MDS14  | -0.3         | -0.16        | -0.36 | -0.41 | -0.45   | -0.36             | -0.36        | -0.34             | -0.32            | -0.33         | -0.35      | -0.32          | -0.3        | -0.17            | 0.03          | -0.21             | -0.39     | -0.35         | -0.25        | -0.4    | -0.25    | -0.37 | -0.39     | -0.16     | -0.39        | -0.4           |
|             | Run2_MDS19  | -0.31        | 0.41         | 0.48  | 0.48  | 0.44    | -0.18             | -0.31        | -0.37             | -0.36            | -0.37         | -0.34      | -0.3           | -0.27       | -0.18            | -0.26         | -0.35             | -0.37     | -0.37         | -0.34        | -0.38   | -0.32    | -0.2  | -0.41     | -0.13     | -0.37        | -0.38          |
|             | Run2_MDS20  | -0.29        | 0.49         | 0.49  | 0.97  | 0.59    | -0.26             | -0.28        | -0.31             | -0.31            | -0.33         | -0.29      | -0.25          | -0.23       | -0.11            | -0.11         | -0.16             | -0.37     | -0.29         | -0.12        | -0.38   | -0.35    | -0.34 | -0.38     | -0.3      | -0.37        | -0.39          |
| Run2_MDS28* | -0.25       | 0.45         | 0.75         | 0.57  | 0.46  | -0.06   | -0.23             | -0.27        | -0.24             | -0.27            | -0.28         | -0.23      | -0.23          | -0.22       | -0.25            | -0.2          | -0.29             | -0.28     | -0.29         | -0.39        | -0.31   | -0.28    | -0.39 | -0.14     | -0.38     | -0.4         |                |
| Run2_MDS5   | -0.29       | 1.5          | 1.5          | 1.81  | 1.69  | -0.03   | -0.41             | -0.3         | -0.24             | -0.33            | -0.33         | -0.31      | -0.29          | -0.09       | -0.02            | -0.17         | -0.27             | -0.35     | -0.21         | -0.35        | -0.29   | -0.07    | -0.38 | -0.23     | -0.35     | -0.35        |                |
| Normal      | Run1_ICUS18 | -0.3         | 1.2          | 2.78  | 0.67  | 1       | -0.27             | -0.24        | -0.35             | -0.37            | -0.37         | -0.36      | -0.31          | -0.27       | -0.2             | -0.29         | -0.16             | -0.38     | -0.39         | -0.29        | -0.43   | -0.32    | -0.37 | -0.46     | -0.39     | -0.41        | -0.44          |
|             | Run1_ICUS22 | -0.34        | 0.77         | 0.98  | 0.44  | 0.34    | -0.19             | -0.26        | -0.32             | -0.35            | -0.4          | -0.39      | -0.35          | -0.32       | -0.08            | -0.11         | -0.22             | -0.36     | -0.34         | -0.49        | -0.43   | -0.37    | -0.28 | -0.43     | -0.37     | -0.43        | -0.43          |
|             | Run1_ICUS24 | -0.32        | 0.78         | 1.16  | 0.7   | 0.19    | -0.23             | -0.36        | -0.41             | -0.4             | -0.38         | -0.38      | -0.3           | -0.26       | -0.06            | -0.14         | -0.03             | -0.38     | -0.33         | -0.49        | -0.46   | -0.35    | -0.29 | -0.45     | -0.13     | -0.46        | -0.45          |
| Normal      | Run1_NI-1   | -0.31        | 0.9          | 1.14  | 0.56  | 0       | -0.28             | -0.36        | -0.38             | -0.39            | -0.4          | -0.38      | -0.31          | -0.25       | -0.15            | -0.17         | -0.06             | -0.44     | -0.39         | -0.55        | -0.44   | -0.31    | -0.32 | -0.39     | -0.02     | -0.44        | -0.43          |
|             | Run1_NI-3   | -0.28        | 0.4          | 0.41  | 0.14  | -0.04   | -0.25             | -0.32        | -0.34             | -0.36            | -0.36         | -0.34      | -0.24          | -0.19       | -0.06            | -0.23         | -0.09             | -0.4      | -0.4          | -0.47        | -0.44   | -0.19    | -0.34 | -0.42     | -0.43     | -0.44        | -0.44          |
|             | Run1_NI-4   | -0.28        | 0.52         | 1.22  | 0.09  | -0.01   | -0.22             | -0.31        | -0.29             | -0.34            | -0.35         | -0.34      | -0.26          | -0.23       | 0.03             | -0.2          | -0.12             | -0.37     | -0.36         | -0.33        | -0.44   | -0.3     | -0.3  | -0.47     | -0.4      | -0.44        | -0.45          |
|             | Run1_NI-6   | -0.31        | 0.65         | 0.92  | 0.31  | -0.01   | -0.21             | -0.31        | -0.26             | -0.34            | -0.37         | -0.37      | -0.3           | -0.28       | -0.11            | -0.22         | -0.22             | -0.39     | -0.36         | -0.34        | -0.43   | -0.29    | -0.41 | -0.46     | -0.44     | -0.43        | -0.43          |
|             | Run2_NI-3   | -0.26        | 0.23         | 0.31  | 0.3   | -0.11   | -0.25             | -0.31        | -0.3              | -0.32            | -0.32         | -0.3       | -0.22          | -0.18       | -0.21            | -0.25         | -0.17             | -0.38     | -0.38         | -0.49        | -0.4    | -0.33    | -0.3  | -0.41     | -0.34     | -0.4         | -0.4           |
|             | Run2_NI-4   | -0.25        | 0.45         | 1.06  | 0.07  | -0.01   | -0.19             | -0.3         | -0.29             | -0.32            | -0.3          | -0.29      | -0.21          | -0.19       | -0.14            | -0.24         | -0.17             | -0.34     | -0.34         | -0.25        | -0.4    | -0.29    | -0.35 | -0.44     | -0.37     | -0.39        | -0.4           |
| Run2_NI-5   | -0.26       | 0.5          | 0.63         | 0.47  | -0.01 | -0.25   | -0.28             | -0.27        | -0.3              | -0.32            | -0.29         | -0.23      | -0.18          | -0.11       | -0.19            | -0.11         | -0.38             | -0.39     | -0.33         | -0.4         | -0.29   | -0.36    | -0.39 | -0.36     | -0.4      | -0.4         |                |
| Run2_NI-6   | -0.29       | 0.44         | 0.58         | 0.24  | 0.09  | -0.2    | -0.28             | -0.28        | -0.31             | -0.34            | -0.33         | -0.27      | -0.25          | -0.22       | -0.29            | -0.28         | -0.36             | -0.36     | -0.3          | -0.4         | -0.31   | -0.34    | -0.4  | -0.34     | -0.39     | -0.4         |                |

Supplemental Table 3: Median expression of each surface marker on each cell population.

|             |             | HLADR Median |              |        |        |         |                   |              |                   |                  |               |            |                |             |                  |               |                   |           |               |              |         |          |        |           |           |              |                |
|-------------|-------------|--------------|--------------|--------|--------|---------|-------------------|--------------|-------------------|------------------|---------------|------------|----------------|-------------|------------------|---------------|-------------------|-----------|---------------|--------------|---------|----------|--------|-----------|-----------|--------------|----------------|
|             |             | Ungated      | CD34-CD38low | HSCs   | MPP    | CMP/GMP | Myelo/Mono-Blasts | ProMonocytes | CD14neg Monocytes | Mature Monocytes | ProMyelocytes | Myelocytes | MetaMyelocytes | MatureGrans | ProErythroblasts | Erythroblasts | LateErythroblasts | PreBCells | Mature Bcells | Plasma Cells | T cells | NK cells | pDCs   | Basophils | Platelets | CD8+ T cells | CD8neg T cells |
| AML/RAEB-T  | Run1_MDS17  | 0.81         | 20.39        | 23.83  | 18.93  | 36.12   | 18.89             | 20.15        | 19.04             | 25.01            | -0.23         | -0.14      | -0.11          | 0.03        | 4.71             | 1.8           | 0.5               | 2.68      | 354           | 8.84         | 0.5     | -0.11    | 54.37  | 0.58      | 0.62      | 0.89         | -0.03          |
|             | Run2_MDS15* | 5.54         | 690.24       | 163.92 | 156.34 | 91.62   | 82.86             | 67.15        | 62.2              | 161.9            | 2.91          | 0.68       | 0.56           | 0.51        | 889.03           | 5.29          | 9.51              | 23.36     | 565.57        | 257.71       | 0.4     | 0.88     | 186.79 | 1.08      | 17.77     | 1.32         | -0.09          |
|             | Run2_MDS4   | 1.54         | 752.93       | 632.84 | 442.64 | 510.02  | 491.92            | 560.78       | 341.38            | 208.91           | 0.78          | 0.62       | 0.43           | 0.42        | 2.78             | 0.8           | 2.48              | 261.69    | 494.8         | 3.21         | 1.05    | 1.82     | 271.97 | 0.98      | 5.97      | 1.93         | 0.49           |
| Higher Risk | Run1_MDS21  | 0.72         | 118.14       | 124.88 | 115.8  | 168.56  | 136               | 40.91        | 15                | 16.51            | -0.23         | -0.18      | -0.13          | 0.08        | 2.67             | 3.82          | 1.02              | 89.91     | 333.43        | 3.81         | -0.23   | 0.83     | 124.92 | 1.22      | 0.15      | 0.36         | -0.35          |
|             | Run1_MDS3   | 0.57         | 62.64        | 82.62  | 72.96  | 114.26  | 82.18             | 37.18        | 13.1              | 25.78            | -0.21         | -0.17      | -0.09          | 0.39        | 4.86             | 4.76          | 0.53              | 108.03    | 378.47        | 11.26        | -0.23   | 1.04     | 216.16 | 1.44      | 0.16      | 0.33         | -0.33          |
|             | Run2_MDS13  | 0.82         | 346.51       | 341.79 | 319.39 | 386.9   | 336.54            | 67.76        | 43.91             | 64.28            | 0.23          | -0.01      | -0.02          | 0.09        | 9.36             | 3.29          | 0.69              | 74.21     | 295.2         | 79.8         | -0.15   | 0.7      | 266.05 | 0.58      | 0.09      | 0.79         | -0.28          |
|             | Run2_MDS16  | -0.01        | 190.04       | 172.89 | 177.8  | 164.21  | 221.76            | 112.46       | 39.92             | 48.51            | 0.06          | -0.1       | -0.03          | 0.01        | 138.11           | 0.7           | 0.13              | 0.03      | 216.37        | 3.84         | -0.33   | -0.16    | 167.35 | 0.34      | -0.12     | -0.27        | -0.35          |
|             | Run2_MDS1   | 0.41         | 467.1        | 323.71 | 496.71 | 435.7   | 337.03            | 165.52       | 168.66            | 192.18           | -0.03         | -0.29      | -0.24          | -0.21       | 22.54            | 2.18          | -0.04             | 4.73      | 266.15        | 13.1         | -0.12   | 0.11     | 119.55 | 1.89      | 0.41      | 0.86         | -0.18          |
|             | Run2_MDS21  | 0.83         | 231.74       | 244.26 | 218.77 | 343.36  | 286.14            | 204.65       | 86.55             | 82.39            | 0.04          | -0.02      | -0.06          | 0.03        | 3.8              | 2.34          | 0.46              | 91.52     | 307.58        | 16.33        | -0.2    | -0.04    | 301.7  | 1.21      | 0.47      | 0.42         | -0.3           |
|             | Run2_MDS26* | -0.24        | 170.17       | 176.81 | 159.57 | 254.34  | 54.87             | 38.03        | 41.23             | 39.88            | -0.29         | -0.31      | -0.27          | -0.23       | 6.1              | 0             | -0.23             | 0.37      | 240.16        | 0.6          | -0.22   | -0.34    | 111.01 | 0.47      | -0.26     | 0.1          | -0.33          |
|             | Run2_MDS27  | 0.84         | 613.58       | 611.39 | 577.95 | 631.44  | 523.32            | 389.89       | 165.1             | 163.66           | 0.22          | 0          | 0.01           | 0.08        | 414.09           | 2.27          | -0.25             | 2.94      | 433.27        | 12.78        | 0.1     | -0.1     | 308.58 | 1.36      | 19.87     | 0.53         | -0.12          |
|             | Run2_MDS2   | 0.93         | 798.8        | 726.34 | 799.34 | 871.35  | 703.58            | 636.6        | 256.89            | 315.74           | 47.14         | 0.57       | 0.27           | 1.01        | 65.3             | 3.99          | 1.62              | 3.12      | 564.94        | 187.7        | -0.14   | -0.3     | 171.15 | 0.84      | 1.95      | -0.03        | -0.14          |
|             | Run2_MDS3   | 0.99         | 274.99       | 303.18 | 236.7  | 414.98  | 347.71            | 80.93        | 53.78             | 67.92            | 0.49          | 0.35       | 0.21           | 0.38        | 15.07            | 5.4           | 1.11              | 108.04    | 352.75        | 10.69        | -0.2    | 0.69     | 412.26 | 1.43      | 0.67      | 0.33         | -0.28          |
| Lower Risk  | Run1_MDS23  | 0.16         | 323.95       | 317.36 | 282.43 | 964.25  | 552.1             | 383.72       | 335.47            | 418.48           | -0.12         | -0.2       | -0.21          | -0.07       | 34.66            | 33.25         | 7.51              | 96.69     | 465.9         | 16.42        | -0.11   | 0.79     | 689.89 | 0.45      | 7         | 2.6          | -0.25          |
|             | Run1_MDS25  | -0.04        | 24.6         | 522.17 | 15.42  | 753.97  | 664.23            | 201.74       | 64.3              | 58.47            | -0.16         | -0.2       | -0.22          | -0.17       | 27.41            | 26.1          | 1.45              | 39.59     | 842.55        | 39.48        | 1.23    | -0.09    | 832.6  | 1.27      | 0.02      | 4.54         | 0.09           |
|             | Run1_MDS5   | 0.48         | 141.49       | 466.65 | 141.93 | 355.22  | 442.05            | 118.47       | 37.48             | 54.36            | -0.22         | -0.12      | -0.11          | 0.22        | 11.79            | 2.41          | 1.1               | 4.67      | 224.19        | 25.53        | 0.19    | 12.2     | 132.8  | 4.67      | 0.88      | 11.43        | -0.13          |
|             | Run1_MDS6   | 0.45         | 639.95       | 417.67 | 347.76 | 759.88  | 786.81            | 453.9        | 163.24            | 146.89           | 0.19          | 0.08       | 0.23           | 0.28        | 149.04           | 3.25          | 1.2               | 82.48     | 345.45        | 19.83        | -0.16   | 0.71     | 190.18 | 1.94      | 4.81      | 0.88         | -0.27          |
|             | Run1_MDS8   | -0.1         | 160.25       | 157.96 | 143.64 | 229.53  | 273.58            | 388.64       | 157.65            | 79               | -0.19         | -0.26      | -0.22          | -0.18       | 5.36             | 8.56          | 0.11              | 1.73      | 202.89        | 11.3         | -0.34   | -0.02    | 77.59  | 1.07      | 0.44      | -0.18        | -0.38          |
|             | Run1_MDS9   | -0.1         | 366.92       | 410.66 | 277.14 | 488.79  | 410.18            | 440.85       | 225.16            | 92.6             | -0.2          | -0.24      | -0.23          | -0.17       | 7.01             | 8.52          | 0.87              | 0.64      | 341.92        | 22.2         | -0.33   | -0.27    | 233.93 | 1.06      | 0.44      | -0.25        | -0.38          |
|             | Run2_MDS12  | 0.21         | 1813.28      | 617.91 | 1094.3 | 1198.7  | 969.08            | 183.39       | 80.74             | 85.32            | -0.14         | -0.16      | -0.04          | 0.15        | 1.8              | 0.43          | -0.03             | 75.18     | 560.34        | 9.2          | -0.07   | 0.13     | 653.95 | 1.02      | 4.06      | 0.89         | -0.23          |
|             | Run2_MDS14  | 0.24         | 36.64        | 10.72  | 120.08 | 65.96   | 390.22            | 335.1        | 68.14             | 96.89            | -0.01         | -0.05      | 0.01           | 0.05        | 1.73             | 0.5           | 0.42              | 147.01    | 353.15        | 4.47         | -0.01   | 0.81     | 311.58 | 0.41      | -0.11     | 0.66         | -0.09          |
|             | Run2_MDS19  | 0.02         | 195.21       | 195.37 | 172.02 | 518.43  | 879.93            | 355.86       | 133.67            | 147.24           | -0.02         | -0.07      | -0.05          | -0.04       | 6.23             | 0.8           | -0.17             | 6.63      | 357.73        | 11.49        | -0.2    | 0.44     | 769.79 | 0.48      | 0.08      | 0.38         | -0.28          |
|             | Run2_MDS20  | 0.42         | 242.54       | 280.51 | 120.01 | 444.87  | 749.45            | 730.6        | 462.9             | 395.45           | 0.53          | 0.18       | 0.18           | 0.29        | 130.3            | 10.56         | 0.64              | 1.47      | 608.86        | 43.24        | -0.11   | 2.78     | 296.23 | 2.05      | 0.22      | 0.58         | -0.13          |
| Run2_MDS28* | 0.21        | 276.31       | 231.42       | 272.09 | 356.91 | 1424.88 | 907.2             | 466.69       | 582.28            | 0.09             | -0.08         | -0.04      | -0.01          | 62.33       | 3.32             | 0.37          | 88.5              | 441.74    | 6.35          | -0.06        | 0.17    | 227.27   | 0.93   | 2.96      | 0.78      | -0.24        |                |
| Run2_MDS5   | 0.5         | 250.53       | 530.07       | 251.24 | 457    | 529.95  | 145.59            | 61.8         | 107.67            | 0                | -0.02         | 0.2        | 0.33           | 113.16      | 1.37             | 1.01          | 2.27              | 186.32    | 38.54         | 0.31         | 10.07   | 161.71   | 4.61   | 0.83      | 10.63     | -0.11        |                |
| ICUS        | Run1_ICUS18 | 0.2          | 139.56       | 133.33 | 133.29 | 199.48  | 470.17            | 440.84       | 225.11            | 160.19           | -0.06         | -0.05      | 0              | 0.11        | 11.6             | 12.72         | 0.61              | 3.61      | 321.28        | 30.08        | -0.21   | -0.17    | 606.15 | 0.47      | 0.03      | 0.42         | -0.27          |
|             | Run1_ICUS22 | 0.26         | 226.79       | 244.37 | 219.13 | 363.82  | 788.44            | 592.45       | 369.14            | 363.13           | -0.06         | -0.12      | -0.1           | -0.02       | 37.17            | 35.7          | 0.64              | 313.3     | 506.86        | 21.21        | -0.06   | -0.03    | 442.86 | 1.73      | 0.52      | 1.9          | -0.2           |
|             | Run1_ICUS24 | 0.21         | 149.91       | 101.91 | 165.37 | 444.27  | 523.61            | 123.96       | 52.32             | 86.56            | -0.15         | -0.18      | -0.14          | -0.08       | 7.5              | 5.82          | 0.6               | 362.34    | 611.04        | 4.89         | -0.05   | -0.26    | 571.25 | 0.69      | 0.44      | 0.48         | -0.16          |
| Normal      | Run1_N1-1   | 0.09         | 89.24        | 86.41  | 85.02  | 205.75  | 317.74            | 192.05       | 50.42             | 53.52            | -0.15         | -0.14      | -0.04          | 0.03        | 3.79             | 3.73          | 0.47              | 197.64    | 267.07        | 7.32         | -0.35   | -0.39    | 194.08 | 1.09      | 0.09      | -0.31        | -0.36          |
|             | Run1_N1-3   | 0.34         | 99.23        | 89.09  | 78.19  | 201.63  | 350.51            | 62.9         | 31.57             | 49.78            | -0.05         | -0.04      | 0.16           | 0.25        | 17.42            | 16.34         | 0.64              | 119.84    | 225.87        | 16.69        | -0.24   | -0.27    | 307.67 | 0.91      | -0.01     | -0.06        | -0.34          |
|             | Run1_N1-4   | 0.33         | 244.68       | 328.05 | 100.43 | 386.65  | 440.9             | 82.31        | 37.88             | 80.42            | -0.06         | -0.03      | 0.11           | 0.19        | 31.8             | 19.95         | 0.55              | 170.7     | 437.44        | 28.73        | -0.19   | -0.14    | 503.53 | 1.7       | 0.74      | -0.14        | -0.23          |
|             | Run1_N1-6   | 0.32         | 107.74       | 105.15 | 101.18 | 217.76  | 307.47            | 77.32        | 44.11             | 67.16            | -0.07         | -0.03      | 0.04           | 0.03        | 14.42            | 6.65          | 0.57              | 314.07    | 449.38        | 14.02        | -0.24   | -0.26    | 394.48 | 2.11      | 0.19      | 0            | -0.3           |
|             | Run2_N1-3   | 0.43         | 105.14       | 102.53 | 89.93  | 279.5   | 548.48            | 105.39       | 47.14             | 73.77            | 0.16          | 0.09       | 0.32           | 0.46        | 14.19            | 12.34         | 0.75              | 144.94    | 223.18        | 12.43        | -0.24   | -0.3     | 282.02 | 0.62      | 0.11      | -0.11        | -0.31          |
|             | Run2_N1-4   | 0.49         | 246.02       | 241.3  | 247.12 | 494.48  | 731.66            | 136.07       | 70.47             | 122.92           | 0.27          | 0.14       | 0.36           | 0.44        | 21.16            | 13.32         | 0.71              | 178.27    | 454.08        | 37.54        | -0.18   | -0.18    | 476.36 | 1.35      | 0.64      | -0.15        | -0.2           |
| Run2_N1-5   | 0.51        | 103.49       | 99.43        | 75.96  | 241.61 | 372.91  | 81.88             | 43.41        | 55.06             | 0.27             | 0.16          | 0.36       | 0.47           | 5.65        | 2.99             | 0.69          | 172.52            | 153.32    | 6.71          | -0.28        | -0.32   | 110.96   | 1.24   | -0.19     | -0.26     | -0.31        |                |
| Run2_N1-6   | 0.39        | 117.24       | 115.63       | 106.58 | 233.41 | 596.59  | 154.36            | 83.18        | 99.1              | 0.34             | 0.19          | 0.22       | 0.26           | 7.91        | 3.38             | 0.55          | 326.24            | 487.28    | 14.3          | -0.22        | -0.25   | 455.06   | 1.33   | -0.17     | 0.06      | -0.29        |                |

Supplemental Table 3: Median expression of each surface marker on each cell population.

|             |             | CD44 Median |              |        |        |         |                   |              |                   |                  |               |            |                |             |                   |               |                   |           |               |              |         |          |        |           |           |              |                |
|-------------|-------------|-------------|--------------|--------|--------|---------|-------------------|--------------|-------------------|------------------|---------------|------------|----------------|-------------|-------------------|---------------|-------------------|-----------|---------------|--------------|---------|----------|--------|-----------|-----------|--------------|----------------|
|             |             | Ungated     | CD34-CD38low | HSCs   | MPP    | CMP/GMP | Myelo/Mono-Blasts | ProMonocytes | CD14neg Monocytes | Mature Monocytes | ProMyelocytes | Myelocytes | MetaMyelocytes | MatureGrans | ProTryptroblast s | Erythroblasts | LateErythroblasts | PreBCells | Mature Bcells | Plasma Cells | T cells | NK cells | pDCs   | Basophils | Platelets | CD8+ T cells | CD8neg T cells |
| AML/RAEB-T  | Run1_MDS17  | 134.56      | 225.04       | 235.05 | 217.9  | 245.11  | 142.17            | 140.02       | 378.72            | 445.03           | 53.84         | 48.68      | 175.8          | 231.8       | 28.04             | 22.22         | 19.88             | 219.99    | 142.29        | 380.55       | 221.73  | 67.79    | 129.31 | 129.24    | 8.48      | 219.85       | 224.42         |
|             | Run2_MDS15* | 356.33      | 324.31       | 383.49 | 362.69 | 250.22  | 180.62            | 190.75       | 571.76            | 685.87           | 144.14        | 146.12     | 314.31         | 395.69      | 245.51            | 282.56        | 411.68            | 561.81    | 225.46        | 327.12       | 328.67  | 234.65   | 506.91 | 156.44    | 160.56    | 324.61       | 331.76         |
|             | Run2_MDS4   | 208.86      | 77.07        | 75.99  | 50.3   | 8.73    | 110.53            | 441.83       | 668.42            | 698.72           | 315.51        | 42.51      | 184.23         | 310.31      | 13.93             | 15.76         | 8.51              | 68.72     | 36.03         | 129.13       | 360.54  | 477.48   | 86.95  | 74.9      | 12.46     | 401.19       | 324.74         |
|             | Run1_MDS21  | 62.48       | 80.67        | 76.75  | 76.93  | 104.15  | 96.48             | 77.43        | 302.55            | 338.56           | 12.32         | 16.31      | 93.45          | 141.43      | 38.95             | 43.25         | 16.83             | 95.72     | 165.85        | 243.03       | 129.46  | 173.93   | 89.97  | 40.69     | 2.21      | 154.21       | 119.13         |
| Higher Risk | Run1_MDS3   | 70.38       | 97.65        | 95.33  | 87     | 129.12  | 117.41            | 97.31        | 319               | 441.59           | 16.61         | 23.78      | 126.57         | 163.39      | 49.13             | 53.18         | 45.88             | 120.17    | 206.29        | 190.64       | 223.89  | 219.75   | 238.69 | 34.31     | 4.73      | 217.17       | 227.07         |
|             | Run2_MDS13  | 108.85      | 176.38       | 180.02 | 158.6  | 135.88  | 117.38            | 163.86       | 474.37            | 540.64           | 19.87         | 30.17      | 240.99         | 272.55      | 112.76            | 37.21         | 17.95             | 124.38    | 179.54        | 337.74       | 230.9   | 277.08   | 296.3  | 57.97     | 4.11      | 246.54       | 220.84         |
|             | Run2_MDS16  | 145.73      | 145.77       | 151.2  | 138.88 | 197.03  | 408.81            | 590.73       | 596.54            | 750.36           | 5.85          | 8.26       | 80.95          | 157.52      | 101.51            | 17.71         | 73.36             | 261.73    | 127.12        | 394.23       | 285.24  | 92.49    | 308.64 | 163.65    | 4.86      | 272          | 288.4          |
|             | Run2_MDS1   | 172.22      | 199.44       | 121.24 | 203.39 | 224.81  | 178.65            | 313.48       | 646.81            | 763.42           | 8.74          | 21.5       | 120.33         | 186.83      | 36.79             | 20.86         | 13.61             | 244.09    | 250.14        | 235.83       | 259.68  | 224.38   | 200.22 | 17.55     | 5.49      | 274.6        | 257.38         |
|             | Run2_MDS21  | 75.73       | 88.18        | 92.16  | 84.24  | 117.98  | 97.88             | 79.83        | 406.83            | 423.58           | 15.18         | 18.73      | 192.45         | 247.58      | 42.75             | 26.66         | 13.58             | 107.24    | 179.59        | 310.39       | 174.26  | 204.19   | 148.72 | 45.52     | 2.88      | 214.76       | 160.59         |
|             | Run2_MDS26* | 38.36       | 65.76        | 69.33  | 65.31  | 67.25   | 23.76             | 54.33        | 419.19            | 484.12           | 5.6           | 9.18       | 75.02          | 123.37      | 19.87             | 37.56         | 15.4              | 31.58     | 73.46         | 233.97       | 185.93  | 43.72    | 341.31 | 24.46     | 6.32      | 212.54       | 171.1          |
|             | Run2_MDS27  | 126.51      | 94.18        | 99.32  | 88.18  | 88.46   | 71.26             | 280.47       | 423.31            | 650.09           | 6.34          | 7.15       | 81.19          | 232.67      | 39.22             | 24.08         | 9.33              | 239.81    | 108.72        | 287.41       | 382.92  | 104.73   | 698.59 | 144.03    | 12.13     | 385.63       | 379.42         |
|             | Run2_MDS2   | 237.96      | 552.55       | 558.7  | 547.18 | 435.17  | 382.41            | 590.03       | 616.5             | 805.84           | 35.24         | 30.89      | 193.49         | 207.52      | 354.33            | 211.1         | 95.95             | 309.42    | 563.88        | 456.33       | 281.8   | 72.19    | 430.36 | 109.08    | 1.98      | 288.03       | 281.34         |
|             | Run2_MDS3   | 101.28      | 114.15       | 128.31 | 103.58 | 159.69  | 128.37            | 135.24       | 436.22            | 456.36           | 30.21         | 45.03      | 244.12         | 280.93      | 136.26            | 47.75         | 21.12             | 145.5     | 241.25        | 375.61       | 302.41  | 292.57   | 84.16  | 55.65     | 6.06      | 299.89       | 303.38         |
|             | Lower Risk  | Run1_MDS23  | 29.22        | 31.72  | 31.07  | 35.28   | 58.07             | 48.57        | 129.68            | 236.65           | 342.3         | 3.08       | 1.58           | 18.44       | 44.1              | 49.39         | 59.8              | 46.35     | 146.85        | 86.63        | 52.59   | 186.45   | 192.26 | 106.02    | 27.6      | 15.34        | 210.48         |
| Run1_MDS25  |             | 93.07       | 59.82        | 28.49  | 97.75  | 71.21   | 257.59            | 306          | 333.62            | 355.18           | 5.87          | 9.86       | 62.8           | 90.23       | 40.52             | 56.82         | 83.85             | 229.03    | 100.48        | 159.25       | 203.5   | 61.94    | 92.67  | 97.61     | 3.18      | 193.97       | 216.1          |
| Run1_MDS5   |             | 298.19      | 211.15       | 193.25 | 202.84 | 124.34  | 165.91            | 286.13       | 292.7             | 545              | 10.13         | 111.96     | 245.02         | 357.52      | 177.83            | 36.38         | 71.27             | 307.32    | 116.69        | 271.48       | 212.52  | 302.4    | 165.5  | 98.82     | 16.09     | 253.45       | 192.82         |
| Run1_MDS6   |             | 144.69      | 46.48        | 41.61  | 38.3   | 45.02   | 83.88             | 274.06       | 402.34            | 475.44           | 19.65         | 20.83      | 90.48          | 167.73      | 38.69             | 15.17         | 101.48            | 157.68    | 123.91        | 365.26       | 216.06  | 141.08   | 215.05 | 113.27    | 4.2       | 235.37       | 203.07         |
| Run1_MDS8   |             | 87.99       | 96.55        | 73.59  | 121.85 | 83.19   | 163.1             | 425.4        | 485.37            | 518.21           | 5.83          | 10.56      | 74.34          | 99.73       | 89.58             | 40.07         | 21.71             | 90.84     | 104.05        | 230.25       | 64.2    | 65.46    | 81.86  | 113.6     | 4.74      | 73.89        | 61.7           |
| Run1_MDS9   |             | 53.75       | 77.56        | 82.98  | 63.65  | 81.93   | 94.02             | 362.97       | 405.29            | 386.4            | 3.95          | 6.01       | 32.2           | 58.3        | 33.3              | 29.63         | 31.23             | 138.34    | 74.68         | 246.77       | 133.03  | 73.48    | 322.27 | 142.72    | 6.49      | 176.22       | 111.47         |
| Run2_MDS12  |             | 64.85       | 100.79       | 90.57  | 81.48  | 163.23  | 180.99            | 283.31       | 433.92            | 631.11           | 3.14          | 4.89       | 58.59          | 118.27      | 40.87             | 33.32         | 22.58             | 236.02    | 27.61         | 209.34       | 183.78  | 219.45   | 189.48 | 61.91     | 15.71     | 239.52       | 152.53         |
| Run2_MDS14  |             | 159.28      | 135.12       | 88.38  | 229.73 | 84.29   | 410.44            | 521.45       | 528.55            | 660.49           | 4.57          | 7.28       | 46.54          | 169.29      | 33.49             | 17.03         | 160.59            | 8         | 124.21        | 496.68       | 324.57  | 91.32    | 170.72 | 110.09    | 8.13      | 297.3        | 342.48         |
| Run2_MDS19  |             | 90.57       | 94.64        | 103.8  | 94.11  | 107.42  | 148.56            | 248.66       | 364.12            | 508.16           | 3.94          | 6.61       | 57.34          | 130.92      | 30.32             | 18.39         | 9.22              | 323.32    | 148.47        | 37.23        | 303.49  | 77.55    | 60.6   | 116.67    | 5.54      | 264.68       | 319.43         |
| Run2_MDS20  |             | 177.99      | 94.3         | 93.02  | 90.38  | 136.46  | 327.31            | 503.84       | 581.95            | 638.44           | 6.98          | 8.37       | 62.71          | 171.35      | 75.69             | 38.54         | 160.68            | 281.84    | 95.84         | 381.63       | 207.51  | 57.82    | 359.9  | 150.14    | 4.34      | 247.56       | 204.03         |
| Run2_MDS28* | 94.98       | 75.8        | 88.43        | 57.13  | 95.86  | 72.07   | 149.33            | 361.02       | 581.54            | 3.59             | 4.32          | 42.78      | 127.52         | 45.65       | 25.5              | 70.15         | 322.56            | 101.93    | 76.51         | 250.24       | 197.34  | 418.16   | 142.85 | 5.06      | 252.02    | 248.49       |                |
| Run2_MDS5   | 441.85      | 261.38      | 283.46       | 141.82 | 195.97 | 211.68  | 323.75            | 394.87       | 797.72            | 13.13            | 190.4         | 383.65     | 533.12         | 140.77      | 35.1              | 253.63        | 325.13            | 144.92    | 268.07        | 299.52       | 422.76  | 203.23   | 156.76 | 11.22     | 351.64    | 277.82       |                |
| ICUS        | Run1_ICUS18 | 109.75      | 82.99        | 76.21  | 69.16  | 76.9    | 319.72            | 427.78       | 482.68            | 513.47           | 6.14          | 6.48       | 43.92          | 105.61      | 57.55             | 43.59         | 134.86            | 214.23    | 143.23        | 56.44        | 214.12  | 77.76    | 226.38 | 120.3     | 2.74      | 223.2        | 212.02         |
|             | Run1_ICUS22 | 65.5        | 65.74        | 80.78  | 60.24  | 74.07   | 108.86            | 309.85       | 330.61            | 388.06           | 5.13          | 5.12       | 23.65          | 66.77       | 33.52             | 39.36         | 71.94             | 28.77     | 55.04         | 111.6        | 215.53  | 21.83    | 347.8  | 76.71     | 2.82      | 217.99       | 214.51         |
|             | Run1_ICUS24 | 65.75       | 82.41        | 80.27  | 78.25  | 96.12   | 117.37            | 222.55       | 318.35            | 477.82           | 6.43          | 6.01       | 27.9           | 85.09       | 30.24             | 27.03         | 16.86             | 3.41      | 63.64         | 123.4        | 185.19  | 50.88    | 75.32  | 57.98     | 1.87      | 167.1        | 202.88         |
| Normal      | Run1_NI-1   | 77.28       | 77.77        | 97.44  | 57     | 77.4    | 135.03            | 300.39       | 327.82            | 503.64           | 5.04          | 4.84       | 27.3           | 99.24       | 38.95             | 43.53         | 82.38             | 5.48      | 64.27         | 169.2        | 178.26  | 36.33    | 228.13 | 108.61    | 2.8       | 178.2        | 178.29         |
|             | Run1_NI-3   | 77.7        | 87.31        | 93.56  | 85.09  | 95.19   | 132.23            | 172.22       | 270.84            | 433.98           | 6.4           | 8.66       | 54.7           | 105.56      | 89.8              | 44.57         | 108.41            | 52.32     | 65.55         | 118.05       | 182.93  | 74.17    | 134.91 | 124.31    | 6.61      | 173.48       | 189.84         |
|             | Run1_NI-4   | 87.88       | 84.41        | 89.37  | 77.46  | 96.11   | 130.91            | 196.23       | 317.03            | 467.22           | 7.32          | 9.91       | 64.7           | 122.37      | 104.23            | 45.61         | 119.87            | 63.83     | 118.3         | 347.82       | 196.17  | 67.14    | 298.27 | 113.19    | 3.93      | 194.88       | 200.21         |
|             | Run1_NI-6   | 53.7        | 106.61       | 122.93 | 96.62  | 93.17   | 140.86            | 204.07       | 329.02            | 480.9            | 6.73          | 7.27       | 32.44          | 89.19       | 58.79             | 36.46         | 55.8              | 8.1       | 62.28         | 278.49       | 209.65  | 53.12    | 170.24 | 69.28     | 2.77      | 203.66       | 212.4          |
|             | Run2_NI-3   | 118.88      | 117.96       | 130.42 | 109.55 | 135.71  | 177.96            | 263.27       | 444.22            | 643.26           | 7.38          | 14         | 110.9          | 170.73      | 91.21             | 49.55         | 163.64            | 43.93     | 85.12         | 142.74       | 266.01  | 103.16   | 176.49 | 167.83    | 5.14      | 248.12       | 280.46         |
|             | Run2_NI-4   | 152.56      | 141.68       | 137.36 | 123.07 | 145.75  | 175.76            | 295.09       | 532.67            | 698.28           | 9.01          | 16.9       | 138.54         | 215.6       | 96.44             | 49.64         | 203.66            | 54.7      | 164.47        | 549.08       | 296.88  | 97.02    | 372.66 | 167.12    | 3.9       | 289.76       | 303.9          |
| Run2_NI-5   | 122.17      | 89.04       | 112.92       | 69.57  | 111.02 | 193.21  | 297.44            | 554.65       | 734.07            | 5.71             | 9.25          | 88.23      | 184.27         | 77.19       | 32.09             | 160.95        | 4.44              | 93.01     | 247.09        | 234.02       | 72.8    | 278.34   | 171.11 | 4.49      | 224.77    | 244.17       |                |
| Run2_NI-6   | 89.89       | 141.13      | 156.33       | 129.91 | 143.25 | 183.82  | 292.28            | 492.2        | 685.57            | 7.34             | 10.15         | 61.81      | 157.34         | 44.58       | 32.67             | 50.72         | 7.68              | 76.42     | 363.5         | 297.57       | 69.89   | 208.24   | 91.31  | 4.66      | 293.21    | 298.02       |                |

Supplemental Table 3: Median expression of each surface marker on each cell population.

|             |             | CD38 Median |              |       |        |         |                   |              |                   |                  |               |            |                |             |                  |               |                   |           |               |              |         |          |        |           |           |              |                |
|-------------|-------------|-------------|--------------|-------|--------|---------|-------------------|--------------|-------------------|------------------|---------------|------------|----------------|-------------|------------------|---------------|-------------------|-----------|---------------|--------------|---------|----------|--------|-----------|-----------|--------------|----------------|
|             |             | Ungated     | CD34-CD38low | HSCs  | MPP    | CMP/GMP | Myelo/Mono-Blasts | ProMonocytes | CD14neg Monocytes | Mature Monocytes | ProMyelocytes | Myelocytes | MetaMyelocytes | MatureGrans | ProErythroblasts | Erythroblasts | LateErythroblasts | PreBCells | Mature Bcells | Plasma Cells | T cells | NK cells | pDCs   | Basophils | Platelets | CD8+ T cells | CD8neg T cells |
| AML/RAEB-T  | Run1_MDS17  | 4.03        | 5.78         | 6.07  | 5.33   | 50.56   | 8.2               | 3.09         | 2.41              | 2.43             | 1.47          | 3.3        | 4.08           | 5.49        | 7.04             | 5.7           | 3.19              | 4.38      | 1.67          | 1903.67      | 2.17    | 78.56    | 3.74   | 108.61    | 1.77      | 2.13         | 2.28           |
|             | Run2_MDS15* | 10.75       | 1.89         | 4.48  | 4.55   | 87.15   | 57.8              | 29.66        | 24.8              | 27.93            | 27.03         | 12.32      | 5.88           | 5.16        | 28.62            | 15.27         | 13.75             | 16.43     | 0.05          | 1747.52      | 1.45    | 78.84    | 26.78  | 124.17    | 15.81     | 1.94         | 0.98           |
|             | Run2_MDS4   | 2.44        | 1.5          | 0.44  | 1.12   | 67.38   | 9.62              | 6.35         | 3.98              | 7.19             | 7.14          | 4.56       | 2.21           | 1.81        | 6.32             | 5.94          | 1.76              | 11.72     | 27.54         | 1856.2       | 0.41    | 9.94     | 10.6   | 52.32     | 4.03      | 0.2          | 0.62           |
|             | Run1_MDS21  | 6.1         | 25.32        | 25.17 | 24.9   | 72.15   | 69.92             | 46.25        | 34.3              | 36.36            | 1.36          | 2.95       | 4.46           | 7.33        | 12.86            | 17.26         | 30.87             | 0.05      | 0.65          | 1835.26      | 0.89    | 27.04    | 23.29  | 257.65    | 21.49     | 0.78         | 0.94           |
| Higher Risk | Run1_MDS3   | 3.84        | 26.85        | 25.59 | 26.1   | 76.41   | 73.19             | 39.62        | 13.88             | 31.21            | 1.1           | 1.85       | 3.57           | 6.61        | 12.92            | 12.99         | 8.02              | 0.12      | 0.58          | 1761.88      | 0.98    | 41.18    | 36.74  | 286.35    | 13.14     | 0.81         | 1.08           |
|             | Run2_MDS13  | 19.17       | 21.61        | 20.43 | 21.51  | 100.28  | 105.34            | 78.3         | 98.36             | 103.76           | 25.19         | 30.26      | 32.93          | 30.52       | 39.63            | 9.76          | 5.25              | -0.02     | -0.02         | 2065.81      | 0.98    | 21.61    | 158.5  | 238.59    | 9.87      | 1.12         | 0.92           |
|             | Run2_MDS16  | 5.94        | 7.24         | 6.53  | 6.05   | 93.8    | 32.44             | 7.74         | 39.1              | 24.22            | 31.92         | 9.47       | 6.41           | 5.38        | 16.69            | 10.21         | 6.29              | 4.45      | 5.02          | 2276.59      | 2.38    | 140.06   | 31.2   | 254.71    | 19.69     | 1.4          | 2.7            |
|             | Run2_MDS1   | 5.88        | 25.5         | 17.45 | 27.58  | 94.35   | 57.89             | 21.6         | 8.77              | 8.39             | 4.89          | 2.34       | 3.94           | 3.47        | 38.71            | 6.93          | 2.21              | 12.13     | 2.25          | 1837.55      | 2.95    | 139.86   | 17.57  | 231.16    | 5.44      | 3.7          | 2.84           |
|             | Run2_MDS21  | 14.02       | 24.21        | 24.67 | 23.67  | 79.48   | 73.52             | 76.2         | 126.4             | 109.07           | 16.86         | 36.43      | 59.66          | 51.85       | 11.66            | 8.36          | 5.33              | -0.12     | 0.08          | 2086.94      | 0.65    | 2.33     | 10.64  | 286.74    | 17.6      | 0.52         | 0.73           |
|             | Run2_MDS26* | 4.75        | 7.72         | 4.77  | 7.09   | 68.39   | 30.26             | 33.95        | 27.79             | 44.68            | 9.28          | 5.78       | 5.29           | 4.91        | 21.88            | 4.63          | 2.03              | 4.47      | 4.89          | 1362.25      | 2.8     | 166.2    | 24.97  | 192.12    | 11.65     | 1.36         | 4.11           |
|             | Run2_MDS27  | 6.1         | 5.34         | 4.39  | 5.36   | 56.98   | 47.46             | 26.44        | 45.97             | 28.08            | 47.68         | 17.77      | 9.63           | 6.23        | 23.31            | 8.43          | 1.71              | 1.41      | 1.24          | 2876.1       | 0.19    | 72.71    | -0.04  | 259.29    | 11.19     | 0.05         | 0.37           |
|             | Run2_MDS2   | 16.83       | 17.07        | 19.51 | 16.02  | 74.41   | 67.8              | 58.57        | 81.3              | 109.89           | 41.75         | 6.75       | 16.89          | 15.27       | 105.31           | 19.85         | 12.77             | 12.43     | 14.6          | 2010.74      | 2.4     | 237.45   | 114.78 | 125.77    | 15.19     | 1.01         | 2.62           |
|             | Run2_MDS3   | 13.14       | 25.85        | 26.69 | 25.23  | 106.26  | 106.41            | 71.74        | 63.84             | 77.6             | 16.16         | 29.07      | 43.09          | 36.23       | 31.46            | 9.64          | 4.73              | -0.09     | 0.24          | 2078.01      | 0.74    | 35.7     | 38.13  | 278.23    | 13.53     | 0.57         | 0.82           |
|             | Run1_MDS23  | 5.02        | 15.72        | 13.32 | 15.87  | 112.86  | 30.27             | 30.25        | 28.69             | 25.23            | 5.31          | 3.9        | 3.91           | 4.21        | 22.48            | 21.71         | 9.67              | 21.94     | 1.47          | 1793.97      | 2.55    | 119.03   | 32.43  | 318.62    | 30.24     | 2.39         | 2.63           |
|             | Run1_MDS25  | 2.79        | 15.72        | 14.49 | 6.68   | 223.42  | 10.63             | 46.03        | 49.19             | 31.06            | 5.75          | 3.1        | 2.06           | 2.34        | 29.31            | 27.18         | 5.97              | 17.25     | 2.6           | 2636.81      | 4.26    | 249.64   | 58.32  | 376.99    | 4         | 3.51         | 5.17           |
|             | Run1_MDS5   | 3.54        | 10.8         | 1.35  | 6.43   | 248.59  | 144.43            | 31.7         | 26.72             | 52.21            | 10.94         | 3.2        | 2.57           | 3.03        | 49.81            | 11.93         | 5.75              | 8.55      | 5.51          | 2047.87      | 2.58    | 46.47    | 174.32 | 305.27    | 4.92      | 39.78        | 1.62           |
| Run1_MDS6   | 4.15        | 20.25       | 19.13        | 15.96 | 68.02  | 46.46   | 25.45             | 31.15        | 27.65             | 6.67             | 4.76          | 4.09       | 3.31           | 42.49       | 13.53            | 5.9           | 9.69              | 4.34      | 2334.2        | 2.54         | 89.97   | 46.65    | 164.75 | 16.7      | 1.91      | 4.37         |                |
| Run1_MDS8   | 3.31        | 21.03       | 23.96        | 21.36 | 164.63 | 61.84   | 12.04             | 35.31        | 32.92             | 9.72             | 5.05          | 2.35       | 2.4            | 38.94       | 20.85            | 5.93          | 10.87             | 5.77      | 1729.74       | 4.28         | 164.76  | 201.63   | 323.2  | 16.36     | 2.42      | 5.01         |                |
| Run1_MDS9   | 2.4         | 16.15       | 17.1         | 15.45 | 76.18  | 48.92   | 2.52              | 19.63        | 29.73             | 3.66             | 3.03          | 1.92       | 1.92           | 22.66       | 22.64            | 10.07         | 2.31              | 0.72      | 2208.21       | 0.71         | 72.55   | 1.82     | 246.9  | 8.72      | -0.07     | 1.63         |                |
| Run2_MDS12  | 9.82        | 15.13       | 13.89        | 17.82 | 70.97  | 27.86   | 32.05             | 26.62        | 20.18             | 12.85            | 11.91         | 10.11      | 8.43           | 9.72        | 6.5              | 4.64          | 18.42             | -0.09     | 1723.11       | 1.42         | 56.76   | 30.5     | 321.25 | 15.93     | 1.23      | 1.61         |                |
| Run2_MDS14  | 4.88        | 5.74        | 0.26         | 3.99  | 295.46 | 20.16   | 5.54              | 37.63        | 31.55             | 20.04            | 7.16          | 5.97       | 3.84           | 20.55       | 12.15            | 4.52          | 393.28            | 19.52     | 1083.21       | 1.8          | 461.74  | 82.49    | 249.87 | 10.88     | 2.94      | 1.43         |                |
| Run2_MDS19  | 3.74        | 10.68       | 7.69         | 10.76 | 113.59 | 48.4    | 34.07             | 42.86        | 28.64             | 11.65            | 5.66          | 3.98       | 2.73           | 11          | 5.48             | 1.94          | 6.47              | 0.8       | 2320.43       | 0.47         | 120.84  | 29.94    | 212.17 | 5.71      | 0.27      | 0.55         |                |
| Run2_MDS20  | 7.05        | 12.11       | 16.14        | 12.56 | 145.01 | 7.8     | 8.45              | 48.27        | 54.34             | 26.19            | 12.7          | 8.62       | 5.6            | 43.55       | 11.38            | 7.14          | 16.63             | 0.2       | 1903.71       | 7.28         | 63.79   | 1.76     | 232.17 | 9         | 3.73      | 7.57         |                |
| Run2_MDS28* | 12.58       | 23.2        | 22.71        | 22.49 | 103.98 | 47.57   | 43.77             | 57.24        | 44.87             | 23.76            | 14.75         | 13.64      | 9.65           | 93.17       | 6.77             | 9.51          | 29.6              | 1.61      | 1213.47       | 0.98         | 127.25  | 57.24    | 141.28 | 25.71     | 0.57      | 1.82         |                |
| Run2_MDS5   | 3.21        | 8.25        | 7.8          | 23.71 | 198.37 | 143.82  | 15.89             | 21.7         | 44.11             | 26.33            | 2.73          | 2.39       | 2.9            | 377.8       | 9.29             | 4.4           | 5.05              | 3.85      | 2074.06       | 2.07         | 39.13   | 162.83   | 319.1  | 5.06      | 48.27     | 1.06         |                |
| ICUS        | Run1_ICUS18 | 3.82        | 13.36        | 24.12 | 10.25  | 83.25   | 3.85              | 5.73         | 18.26             | 19.99            | 7.27          | 5.74       | 4.6            | 3.25        | 17.37            | 14.68         | 4.16              | 12.3      | 4.19          | 1954.54      | 2.69    | 86.05    | 22.38  | 188.86    | 20.8      | 0.62         | 3.61           |
|             | Run1_ICUS22 | 4.1         | 19.54        | 17.63 | 19.39  | 111.74  | 32.11             | 20.17        | 65.3              | 58.7             | 8.07          | 6.25       | 4.72           | 3.06        | 29.19            | 29.04         | 4.81              | 151.34    | 15.95         | 1694.7       | 1.9     | 436.74   | 3.47   | 164.13    | 8.49      | 1.6          | 2.04           |
|             | Run1_ICUS24 | 4.26        | 18.67        | 13.87 | 20.26  | 129.79  | 79.75             | 50.55        | 42.09             | 33.94            | 5.15          | 3.94       | 3.9            | 3.27        | 19.88            | 14.29         | 10.67             | 277.35    | 6             | 1758.26      | 1.46    | 241.37   | 41.86  | 141.46    | 19.41     | 2.02         | 1.07           |
|             | Run2_ICUS18 | 3.45        | 18.48        | 14.38 | 19.03  | 189.21  | 83.32             | 32.48        | 39.86             | 29.34            | 5.91          | 3.63       | 3.23           | 2.49        | 20.41            | 18.06         | 5.14              | 372.2     | 17.29         | 1875.65      | 4.8     | 214.48   | 90.87  | 132.64    | 30.1      | 2.46         | 7.35           |
| Normal      | Run1_NI-3   | 7.41        | 20.73        | 17.28 | 18.59  | 114.55  | 65.85             | 48.57        | 47.34             | 30.44            | 15.5          | 9.29       | 7.27           | 5.31        | 35.32            | 14.71         | 8.36              | 58.2      | 7.48          | 2137.68      | 2.29    | 61.25    | 40.65  | 184.47    | 8.86      | 1.26         | 3.86           |
|             | Run1_NI-4   | 6.69        | 19.08        | 19.41 | 18     | 138.33  | 72.98             | 55.64        | 47.41             | 32.67            | 11.96         | 7.77       | 6.26           | 5.15        | 38.05            | 15.77         | 7.31              | 53.76     | 5.23          | 2501.99      | 1.71    | 147.81   | 57.2   | 191.67    | 9.38      | 1.29         | 2.28           |
|             | Run1_NI-6   | 6.67        | 11.7         | 8.95  | 10.75  | 144.68  | 84.87             | 53.38        | 39.61             | 27.07            | 10.78         | 7.52       | 6.58           | 5.19        | 27.17            | 10.66         | 6.88              | 285.35    | 7.29          | 2290.34      | 2.77    | 142.56   | 18.86  | 292.38    | 8.9       | 1.97         | 3.24           |
|             | Run2_NI-3   | 7.26        | 19.27        | 17.54 | 19.67  | 124.23  | 82.58             | 59.72        | 45.04             | 27.31            | 10.12         | 9.46       | 6.53           | 5.26        | 26.18            | 10.76         | 6.11              | 72.03     | 5.74          | 2017.48      | 1.41    | 58.79    | 32.82  | 171.88    | 9.01      | 0.77         | 2.3            |
|             | Run2_NI-4   | 7.97        | 18.83        | 14.45 | 21.35  | 132.45  | 92.79             | 69.01        | 49.14             | 32.47            | 28.99         | 11.15      | 7.35           | 5.63        | 25.99            | 10.79         | 7.32              | 108.12    | 3.61          | 2619.1       | 1.06    | 140.2    | 48.13  | 177.96    | 10.42     | 0.8          | 1.47           |
|             | Run2_NI-5   | 7.81        | 18.05        | 14.12 | 21.46  | 164.01  | 142.23            | 84.02        | 52.17             | 36.62            | 30.1          | 10.32      | 6.63           | 4.91        | 60.22            | 11.9          | 5.86              | 376.94    | 7.1           | 2463.39      | 3.85    | 113.88   | 40.55  | 132.37    | 6.66      | 2.76         | 6.03           |
| Run2_NI-6   | 9.47        | 9.28        | 6.37         | 9.02  | 117.53 | 94.76   | 59.32             | 45.42        | 28.21             | 26.04            | 14.14         | 9.83       | 6.89           | 16.05       | 6.97             | 6.09          | 278.77            | 6.38      | 2390.24       | 1.71         | 135.45  | 13.93    | 246.82 | 13.9      | 1.09      | 2.16         |                |



Supplemental Table 3: Median expression of each surface marker on each cell population.

|             |             | CD14 Median |              |       |       |         |                   |              |                   |                  |               |            |                |             |                  |               |                   |           |               |              |         |          |       |           |           |              |                |
|-------------|-------------|-------------|--------------|-------|-------|---------|-------------------|--------------|-------------------|------------------|---------------|------------|----------------|-------------|------------------|---------------|-------------------|-----------|---------------|--------------|---------|----------|-------|-----------|-----------|--------------|----------------|
|             |             | Ungated     | CD34-CD38low | HSCs  | MPP   | CMP/GMP | Myelo/Mono-Blasts | ProMonocytes | CD14neg Monocytes | Mature Monocytes | ProMyelocytes | Myelocytes | MetaMyelocytes | MatureGrans | ProErythroblasts | Erythroblasts | LateErythroblasts | PreBcells | Mature Bcells | Plasma Cells | T cells | NK cells | pDCs  | Basophils | Platelets | CD8+ T cells | CD8neg T cells |
| AML/RAEB-T  | Run1_MDS17  | 0.1         | -0.02        | 0.04  | -0.06 | 0.54    | 0                 | 0.23         | 0.98              | 11.2             | -0.15         | 0.2        | 0.14           | 0.46        | 0.89             | 1.44          | 0.82              | 0.05      | -0.27         | 7.45         | -0.16   | 0.97     | -0.2  | 2.09      | 0.1       | -0.19        | -0.13          |
|             | Run2_MDS15* | 1.41        | -0.21        | -0.16 | -0.2  | 0.46    | 0.64              | 1.16         | 2.48              | 35.2             | 0.78          | 0.78       | 1.41           | 1.06        | 0.43             | 3.57          | 7.23              | -0.29     | 4.42          | 4.42         | -0.13   | 0.72     | 0.71  | 1.18      | 0.57      | -0.12        | -0.13          |
|             | Run2_MDS4   | 0.06        | -0.22        | -0.25 | -0.25 | -0.53   | -0.12             | 0.35         | 1.01              | 11.42            | 0.05          | -0.02      | -0.07          | 0.06        | 0.58             | 2             | 1.85              | 0.52      | 0.13          | 6.89         | -0.18   | -0.08    | -0.06 | 0.89      | 1.36      | -0.2         | -0.16          |
| Higher Risk | Run1_MDS21  | 0.07        | 0.33         | 0.14  | 0.25  | 0.65    | 0.63              | 0.72         | 2.13              | 11.43            | -0.23         | -0.08      | 0.08           | 0.54        | 0.76             | 1.51          | 1.38              | -0.28     | -0.32         | 9.27         | -0.25   | 0.99     | -0.09 | 2.05      | 0.69      | -0.24        | -0.25          |
|             | Run1_MDS3   | 0.02        | 0.47         | 0.41  | 0.37  | 0.71    | 0.75              | 0.68         | 1.28              | 11.26            | -0.22         | -0.1       | 0.08           | 0.61        | 0.83             | 1.22          | 1.04              | -0.24     | -0.3          | 6            | -0.18   | 0.87     | 0.39  | 2.21      | 0.35      | -0.2         | -0.17          |
|             | Run2_MDS13  | 0.28        | 0.02         | 0.12  | -0.01 | 0.52    | 0.58              | 0.72         | 1.19              | 9.92             | 0.36          | 0.61       | 0.46           | 0.64        | 1.27             | 1.79          | 1.12              | -0.2      | -0.28         | 4.13         | -0.17   | 0.35     | 1.96  | 1.35      | 0.25      | -0.15        | -0.19          |
|             | Run2_MDS16  | 0.3         | -0.03        | -0.05 | -0.12 | 0.4     | 0.26              | 1.25         | 3.47              | 20.01            | 0.54          | 0.2        | 0.19           | 0.35        | 0.42             | 3.02          | 1.45              | 0.03      | -0.21         | 6.45         | -0.16   | 1.37     | 0.41  | 1.87      | 0.71      | -0.2         | -0.14          |
|             | Run2_MDS1   | 0.19        | -0.07        | -0.27 | -0.09 | 0.55    | 0.22              | 0.35         | 1.79              | 16.49            | -0.11         | -0.21      | -0.02          | 0.18        | 0.88             | 2.05          | 1.21              | 0.66      | -0.21         | 4.66         | -0.1    | 0.85     | -0.03 | 1.09      | 0.3       | -0.1         | -0.1           |
|             | Run2_MDS21  | 0.28        | 0.11         | 0.36  | 0.04  | 0.46    | 0.45              | 0.52         | 1.18              | 10.66            | 0.22          | 0.55       | 0.66           | 0.85        | 0.84             | 1.6           | 1.1               | -0.25     | -0.26         | 5.11         | -0.23   | -0.14    | 0.34  | 2.28      | 0.5       | -0.22        | -0.23          |
|             | Run2_MDS26* | 0.18        | 0.13         | 0.21  | 0.01  | 0.77    | 0.44              | 0.8          | 0.96              | 11.88            | 0.11          | 0.06       | -0.02          | 0.11        | 0.86             | 1.89          | 1.2               | 0.26      | -0.2          | 5.48         | -0.18   | 1.41     | 0.4   | 1.6       | -0.22     | -0.22        | -0.15          |
|             | Run2_MDS27  | 0.5         | -0.12        | -0.16 | -0.15 | 0.43    | 0.22              | 1.26         | 3.01              | 21.24            | 0.88          | 0.53       | 0.34           | 0.42        | 0.46             | 3.43          | 1.8               | -0.02     | -0.26         | 21.23        | -0.2    | 0.87     | -0.04 | 1.66      | 1.18      | -0.22        | -0.18          |
|             | Run2_MDS2   | 0.18        | -0.2         | 0.12  | -0.23 | 0       | 0.01              | 0.88         | 1.78              | 17.06            | 0.46          | 0.12       | 0.21           | 0.48        | 1.44             | 1.93          | 1.39              | 0.48      | -0.19         | 89.89        | -0.12   | 1.17     | 0.31  | 0.76      | 0.32      | -0.12        | -0.12          |
|             | Run2_MDS3   | 0.34        | 0.16         | 0.19  | 0.16  | 0.51    | 0.54              | 0.72         | 0.7               | 9.8              | 0.25          | 0.68       | 0.62           | 0.97        | 0.96             | 1.79          | 1.14              | -0.23     | -0.25         | 6.16         | -0.19   | 0.59     | 0.76  | 2.01      | 0.5       | -0.19        | -0.19          |
| Lower Risk  | Run1_MDS23  | 0.19        | -0.08        | 0.1   | 0.06  | 0.45    | 0.14              | 1.1          | 2.9               | 21.15            | -0.1          | -0.07      | -0.01          | 0.11        | 0.85             | 1.31          | 1.4               | 1.13      | -0.29         | 5.5          | -0.14   | 0.92     | -0.04 | 2.36      | 0.89      | -0.11        | -0.15          |
|             | Run1_MDS25  | 0.35        | 1.03         | 0.56  | 0.81  | 1.27    | 0.02              | 1.4          | 2.81              | 14.35            | 0.21          | 0.14       | 0.07           | 0.26        | 1.06             | 1.94          | 1.42              | 1.24      | -0.3          | 25.18        | -0.06   | 1.94     | 0.21  | 2.44      | 0.11      | -0.1         | 0.01           |
|             | Run1_MDS5   | 0.41        | 0.26         | 0.3   | -0.05 | 1.06    | 0.7               | 1.04         | 0.96              | 12.11            | 0.72          | 0.12       | -0.01          | 0.37        | 1.44             | 3.28          | 2.13              | 0.81      | -0.09         | 7.44         | -0.02   | 0.6      | 1.23  | 2.35      | 1.46      | 0.52         | -0.09          |
|             | Run1_MDS6   | 0.36        | -0.02        | -0.06 | -0.09 | 0.43    | 0.07              | 0.84         | 2.89              | 18.88            | 0.24          | 0.25       | 0.22           | 0.31        | 0.84             | 2.73          | 0.95              | 0.58      | -0.21         | 11           | -0.11   | 1.01     | 0.6   | 1.59      | 0.76      | -0.13        | -0.09          |
|             | Run1_MDS8   | 0.4         | 0.85         | 1.21  | 0.4   | 1.25    | 0.57              | 1.33         | 4.04              | 23.24            | 0.27          | 0.09       | 0.16           | 0.33        | 1.12             | 2.11          | 1.53              | 0.59      | -0.14         | 15.24        | -0.18   | 1.58     | 2.15  | 1.91      | 0.65      | -0.2         | -0.17          |
|             | Run1_MDS9   | 0.15        | 0.08         | 0.12  | 0.04  | 0.58    | 0.16              | 0.38         | 2.57              | 13.93            | -0.02         | -0.01      | 0.07           | 0.29        | 0.77             | 1.75          | 1.1               | 0.05      | -0.31         | 6.42         | -0.23   | 1.03     | 0.15  | 1.68      | 0.41      | -0.26        | -0.21          |
|             | Run2_MDS12  | 0.3         | -0.21        | 0.17  | -0.12 | 0       | -0.1              | 0.94         | 1.87              | 13.91            | 0.07          | 0.12       | 0.2            | 0.33        | 0.88             | 1.86          | 1.18              | 0.77      | -0.33         | 6.8          | -0.21   | 0.51     | -0.03 | 2.22      | 0.56      | -0.2         | -0.21          |
|             | Run2_MDS14  | 0.49        | 0.18         | -0.08 | -0.61 | 1.37    | 0.17              | 2            | 3.65              | 32.73            | 0.57          | 0.22       | 0.29           | 0.33        | 0.99             | 2.19          | 0.83              | 2.87      | -0.02         | 5.42         | -0.1    | 2.34     | 0.22  | 1.59      | 2.49      | -0.09        | -0.1           |
|             | Run2_MDS19  | 0.37        | 0.05         | 0.04  | 0.06  | 0.48    | 0.09              | 1.5          | 3                 | 20.95            | 0.41          | 0.41       | 0.31           | 0.31        | 1.13             | 2.19          | 0.93              | 0.66      | -0.2          | 7.79         | -0.19   | 1.1      | -0.11 | 1.55      | 0.33      | -0.23        | -0.18          |
|             | Run2_MDS20  | 0.38        | -0.11        | 0.05  | -0.25 | 1.14    | -0.05             | 1.08         | 3.59              | 18.14            | 0.61          | 0.38       | 0.32           | 0.4         | 0.71             | 2.93          | 0.9               | 0.66      | -0.27         | 16.38        | -0.06   | 0.65     | -0.09 | 1.29      | 0.37      | -0.1         | -0.06          |
| Run2_MDS28* | 0.48        | -0.01       | 0.08         | -0.01 | 0.31  | -0.15   | 0.42              | 1.78         | 25.54             | 0.32             | 0.24          | 0.4        | 0.48           | 1.11        | 2.18             | 0.81          | 1.27              | -0.24     | 6.74          | -0.18        | 0.9     | 1.14     | 1.09  | 0.74      | -0.21     | -0.15        |                |
| Run2_MDS5   | 0.12        | 0.5         | -0.49        | 0.63  | 0.05  | 0.21    | 0.46              | 0.84         | 10.53             | 0.52             | 0.03          | -0.12      | 0.09           | 1.56        | 2.76             | 1.52          | 0.27              | -0.26     | 6.45          | -0.05        | 0.36    | 0.9      | 1.77  | 1.98      | 0.46      | -0.13        |                |
| ICUS        | Run1_ICUS18 | 0.49        | 0.27         | -0.06 | 0.01  | 0.76    | -0.1              | 1.25         | 3.85              | 22.95            | 0.26          | 0.23       | 0.36           | 0.49        | 1.12             | 1.77          | 0.72              | 0.9       | -0.22         | 6.38         | -0.13   | 1.18     | 0.05  | 1.79      | 0.76      | -0.23        | -0.1           |
|             | Run1_ICUS22 | 0.57        | 0.11         | 0.02  | 0.23  | 0.47    | 0.01              | 1.09         | 3.32              | 22.07            | 0.01          | 0.21       | 0.38           | 0.54        | 0.83             | 1.73          | 0.83              | 1.8       | -0.06         | 6.14         | -0.13   | 2.77     | 0.02  | 1.25      | 0.3       | -0.16        | -0.12          |
|             | Run1_ICUS24 | 0.33        | 0.1          | 0.2   | 0.02  | 0.77    | 0.5               | 1.18         | 3.47              | 27.08            | -0.03         | 0.09       | 0.2            | 0.32        | 0.85             | 1.55          | 1.07              | 1.66      | -0.21         | 6.01         | -0.19   | 2        | 0.04  | 1.36      | 0.87      | -0.19        | -0.2           |
| Normal      | Run1_NI-1   | 0.37        | 0.32         | -0.17 | 0.33  | 1.19    | 0.52              | 1.46         | 3.17              | 36.79            | -0.03         | -0.01      | 0.2            | 0.38        | 0.81             | 1.62          | 0.74              | 2.22      | 0.2           | 6.5          | -0.09   | 1.9      | 0.81  | 1.47      | 0.87      | -0.17        | -0.05          |
|             | Run1_NI-3   | 0.5         | 0.34         | 0.35  | 0.02  | 0.99    | 0.62              | 1.75         | 3.31              | 24.02            | 0.64          | 0.42       | 0.44           | 0.47        | 1.51             | 2.17          | 0.74              | 1.43      | -0.17         | 7.9          | -0.17   | 0.85     | 0.5   | 1.6       | 0.25      | -0.23        | -0.12          |
|             | Run1_NI-4   | 0.5         | 0.48         | 0.63  | 0.36  | 1.09    | 0.64              | 1.5          | 3.39              | 19.08            | 0.69          | 0.41       | 0.37           | 0.42        | 1.43             | 2.15          | 0.65              | 1.28      | -0.2          | 11.64        | -0.14   | 1.51     | 0.38  | 1.59      | 0.45      | -0.17        | -0.12          |
|             | Run1_NI-5   | 0.51        | 0.1          | -0.03 | 0.08  | 0.98    | 0.69              | 1.58         | 3.23              | 19.97            | 0.45          | 0.31       | 0.35           | 0.44        | 1.35             | 1.88          | 0.77              | 1.78      | -0.14         | 8.59         | -0.13   | 1.45     | 0.11  | 1.95      | 0.23      | -0.19        | -0.11          |
|             | Run2_NI-3   | 0.42        | 0.09         | 0.11  | 0.07  | 0.68    | 0.35              | 1.46         | 3.15              | 18.43            | 0.8           | 0.4        | 0.37           | 0.44        | 1.01             | 1.97          | 0.53              | 1.08      | -0.16         | 7.43         | -0.18   | 0.65     | 0.15  | 1.19      | 0.33      | -0.23        | -0.14          |
|             | Run2_NI-4   | 0.46        | 0.44         | 0.46  | 0.32  | 0.66    | 0.38              | 1.48         | 3.04              | 15.28            | 0.9           | 0.45       | 0.36           | 0.41        | 1.16             | 1.98          | 0.52              | 1.35      | -0.21         | 11.67        | -0.18   | 1.2      | 0.16  | 1.2       | 0.36      | -0.2         | -0.16          |
| Run2_NI-5   | 0.57        | 0.27        | -0.2         | 0.47  | 0.91  | 0.62    | 1.43              | 3.14         | 15.03             | 0.92             | 0.5           | 0.42       | 0.41           | 1.23        | 2.39             | 0.67          | 2.11              | 0.02      | 9.84          | -0.1         | 1.09    | 0.32     | 1.13  | 0.17      | -0.15     | -0.06        |                |
| Run2_NI-6   | 0.47        | -0.02       | -0.05        | -0.02 | 0.8   | 0.37    | 1.38              | 2.95         | 17.14             | 0.66             | 0.49          | 0.39       | 0.42           | 1.09        | 1.8              | 0.72          | 1.45              | -0.15     | 10.82         | -0.15        | 1.28    | -0.02    | 1.5   | 0.14      | -0.19     | -0.13        |                |

Supplemental Table 9: Median expression of each surface marker on each cell population.

**Calreticulin Median**

|             | Ungated | CD34-CD38low | HSCs  | MPP   | CMP/GMP | Myelo/Mono-Blasts | ProMonocytes | CD14neg Monocytes | Mature Monocytes | ProMyelocytes | Myelocytes | MetaMyelocytes | MatureGrans | ProErythroblasts | Erythroblasts | LateErythroblasts | PreBCells | Mature B Cells | Plasma Cells | T cells | NK cells | pDCs  | Basophils | Platelets | CD8+ T cells | CD8neg T cells |
|-------------|---------|--------------|-------|-------|---------|-------------------|--------------|-------------------|------------------|---------------|------------|----------------|-------------|------------------|---------------|-------------------|-----------|----------------|--------------|---------|----------|-------|-----------|-----------|--------------|----------------|
| Run1_MDS17  | -0.1    | -0.21        | -0.22 | -0.24 | -0.17   | -0.21             | 0.36         | -0.01             | 0.14             | 1.31          | 1.74       | 0.41           | 0.64        | -0.35            | -0.38         | -0.2              | -0.18     | -0.47          | -0.43        | -0.4    | -0.32    | 10.19 | 0.21      | 0.19      | -0.4         | -0.4           |
| Run2_MDS15* | -0.27   | -0.34        | -0.34 | -0.36 | -0.35   | -0.3              | -0.3         | -0.37             | -0.37            | 0.1           | 0.12       | -0.02          | 0           | -0.41            | -0.26         | -0.18             | -0.32     | -0.42          | -0.3         | -0.34   | -0.23    | -0.28 | -0.19     | -0.36     | -0.38        | -0.38          |
| Run2_MDS4   | -0.12   | -0.23        | -0.19 | -0.21 | -0.6    | -0.32             | -0.34        | -0.36             | -0.28            | 0.58          | 0.76       | 0.72           | 0.87        | -0.38            | -0.36         | -0.07             | -0.36     | -0.28          | -0.27        | -0.37   | -0.33    | -0.28 | -0.15     | 0.04      | -0.37        | -0.38          |
| Run1_MDS21  | -0.04   | -0.1         | -0.23 | -0.13 | -0.14   | -0.12             | 0.4          | 0.04              | 0.28             | 1.33          | 2.02       | 1.11           | 1.37        | -0.38            | -0.3          | 1.19              | -0.4      | -0.45          | -0.55        | -0.41   | -0.42    | 7.12  | -0.21     | 0.49      | -0.38        | -0.42          |
| Run1_MDS3   | 0.38    | 0.6          | 0.19  | 0.32  | 0.39    | 0.61              | 1.4          | 0.89              | 0.55             | 1.94          | 2.63       | 1.38           | 2.08        | -0.34            | -0.39         | 0.71              | -0.36     | -0.43          | -0.35        | -0.39   | -0.35    | 4.27  | -0.04     | 0.25      | -0.38        | -0.4           |
| Run2_MDS13  | -0.12   | -0.23        | -0.26 | -0.23 | -0.25   | -0.24             | -0.26        | -0.3              | -0.23            | 0.95          | 1.35       | 0.57           | 0.66        | -0.36            | -0.37         | -0.17             | -0.35     | -0.36          | -0.27        | -0.38   | -0.4     | 0.07  | -0.21     | 0.14      | -0.37        | -0.38          |
| Run2_MDS16  | 0.53    | -0.26        | -0.23 | -0.28 | -0.39   | -0.35             | -0.4         | -0.4              | -0.36            | 1.45          | 1.78       | 1.92           | 1.86        | -0.3             | -0.39         | 0.55              | -0.29     | -0.42          | -0.44        | -0.38   | -0.37    | -0.18 | -0.34     | 0.49      | -0.38        | -0.38          |
| Run2_MDS1   | -0.27   | -0.36        | -0.4  | -0.44 | -0.37   | -0.36             | -0.37        | -0.38             | -0.36            | 0.07          | 0.05       | 0.26           | 0.57        | -0.33            | -0.41         | -0.32             | -0.26     | -0.42          | -0.33        | -0.39   | -0.39    | -0.36 | -0.47     | 0.23      | -0.39        | -0.39          |
| Run2_MDS21  | -0.19   | -0.34        | -0.3  | -0.34 | -0.31   | -0.31             | -0.32        | -0.33             | -0.34            | 0.19          | 1.46       | 0.7            | 0.93        | -0.39            | -0.41         | -0.25             | -0.36     | -0.41          | -0.25        | -0.4    | -0.37    | 3.73  | -0.42     | 0.21      | -0.38        | -0.4           |
| Run2_MDS26* | -0.05   | -0.31        | -0.22 | -0.35 | -0.31   | -0.31             | -0.24        | -0.38             | -0.34            | 0.12          | 0.22       | 0.53           | 0.61        | -0.32            | -0.4          | -0.37             | -0.3      | -0.38          | -0.54        | -0.4    | -0.34    | -0.12 | -0.38     | -0.05     | -0.39        | -0.4           |
| Run2_MDS27  | -0.15   | -0.31        | -0.29 | -0.33 | -0.3    | -0.33             | -0.42        | -0.37             | -0.35            | 1.06          | 1.64       | 1.79           | 1.82        | -0.35            | -0.4          | -0.3              | -0.35     | -0.42          | -0.42        | -0.37   | -0.35    | -0.46 | -0.38     | 1.04      | -0.36        | -0.38          |
| Run2_MDS2   | -0.23   | -0.37        | -0.26 | -0.4  | -0.35   | -0.35             | -0.43        | -0.39             | -0.43            | -0.03         | 0.12       | 0.03           | 0.46        | -0.26            | -0.15         | 0.12              | -0.34     | -0.28          | -0.37        | -0.39   | -0.37    | -0.14 | -0.32     | -0.1      | -0.35        | -0.4           |
| Run2_MDS3   | -0.08   | -0.25        | -0.28 | -0.26 | -0.3    | -0.29             | -0.2         | -0.27             | -0.05            | 1.55          | 2.1        | 1.04           | 1.79        | -0.35            | -0.38         | -0.31             | -0.38     | -0.42          | -0.47        | -0.39   | -0.35    | -0.05 | -0.2      | 0.22      | -0.37        | -0.39          |
| Run1_MDS23  | 0.59    | -0.32        | -0.24 | -0.33 | -0.4    | -0.27             | -0.18        | -0.31             | -0.33            | 1.73          | 1.76       | 1.24           | 0.99        | -0.4             | -0.35         | 0.06              | -0.25     | -0.44          | -0.47        | -0.42   | -0.37    | -0.41 | -0.45     | 0.36      | -0.43        | -0.42          |
| Run1_MDS25  | 1.22    | 1.15         | -0.62 | 1.18  | -0.39   | -0.46             | -0.31        | -0.28             | -0.18            | 1.62          | 1.83       | 1.77           | 1.67        | -0.44            | -0.22         | 2.12              | -0.39     | -0.48          | -0.43        | -0.43   | -0.35    | -0.41 | -0.36     | -0.04     | -0.42        | -0.43          |
| Run1_MDS5   | 0.1     | 0.19         | -0.52 | 0.35  | -0.16   | -0.31             | -0.39        | -0.06             | -0.07            | 1.75          | 0.63       | 0.24           | 0.36        | -0.08            | -0.19         | 0.63              | -0.24     | -0.37          | -0.45        | -0.37   | -0.34    | -0.2  | -0.26     | 0.4       | -0.4         | -0.36          |
| Run1_MDS6   | 1.06    | -0.26        | -0.25 | 0.3   | -0.3    | -0.28             | -0.28        | -0.28             | -0.29            | 2.59          | 2.89       | 2.16           | 1.51        | -0.3             | -0.41         | 0.95              | -0.35     | -0.42          | -0.52        | -0.39   | -0.33    | -0.33 | -0.21     | 0.63      | -0.39        | -0.39          |
| Run1_MDS8   | 1.33    | 0.09         | -0.35 | -0.19 | -0.36   | -0.34             | -0.25        | -0.36             | -0.26            | 2.19          | 2.67       | 2.14           | 2.16        | -0.29            | -0.29         | 0.81              | -0.35     | -0.39          | -0.41        | -0.38   | -0.33    | -0.04 | -0.12     | 0.9       | -0.37        | -0.38          |
| Run1_MDS9   | 0.82    | -0.27        | -0.24 | -0.28 | -0.31   | -0.33             | -0.42        | -0.39             | -0.24            | 1.94          | 2.3        | 2.2            | 2.17        | -0.38            | -0.39         | 1.35              | -0.35     | -0.44          | -0.51        | -0.42   | -0.33    | -0.3  | -0.4      | 0.27      | -0.42        | -0.41          |
| Run2_MDS12  | 0.3     | -0.41        | -0.38 | -0.41 | -0.38   | -0.41             | -0.37        | -0.36             | -0.35            | 0.53          | 0.6        | 0.78           | 0.84        | -0.37            | -0.4          | -0.22             | -0.36     | -0.39          | -0.38        | -0.38   | -0.34    | -0.38 | -0.33     | 0.14      | -0.37        | -0.38          |
| Run2_MDS14  | 0.87    | -0.11        | -0.08 | -0.31 | -0.35   | -0.44             | -0.36        | -0.41             | -0.37            | 2.96          | 2.33       | 2.11           | 1.34        | -0.32            | -0.37         | 1.14              | -0.38     | -0.4           | -0.47        | -0.38   | -0.35    | -0.39 | -0.27     | 0.25      | -0.39        | -0.37          |
| Run2_MDS19  | 1.6     | -0.34        | -0.36 | -0.32 | -0.3    | -0.4              | -0.38        | -0.37             | -0.35            | 1.76          | 2.48       | 2.63           | 2.38        | -0.35            | -0.38         | -0.19             | -0.39     | -0.41          | -0.52        | -0.39   | -0.36    | -0.37 | -0.34     | 0.52      | -0.38        | -0.39          |
| Run2_MDS20  | 0.22    | -0.41        | -0.38 | -0.61 | -0.45   | -0.41             | -0.42        | -0.41             | -0.38            | 1.32          | 1.49       | 1.61           | 1.39        | -0.34            | -0.34         | 0.81              | -0.38     | -0.38          | -0.4         | -0.38   | -0.39    | -0.31 | -0.36     | 0.24      | -0.39        | -0.38          |
| Run2_MDS28* | 1.06    | -0.25        | -0.19 | -0.29 | -0.37   | -0.38             | -0.38        | -0.38             | -0.38            | 1.42          | 1.78       | 1.93           | 1.6         | -0.26            | -0.32         | 0.92              | -0.38     | -0.41          | -0.4         | -0.4    | -0.36    | -0.37 | -0.31     | 0.74      | -0.4         | -0.4           |
| Run2_MDS5   | -0.1    | -0.08        | -0.67 | -0.46 | -0.37   | -0.45             | -0.38        | -0.27             | -0.31            | 0.22          | 0.04       | -0.05          | 0.08        | -0.33            | -0.3          | 0.3               | -0.23     | -0.32          | -0.37        | -0.37   | -0.37    | -0.29 | -0.38     | 0.47      | -0.39        | -0.36          |
| Run1_ICUS18 | 1.32    | -0.2         | -0.59 | -0.29 | -0.46   | -0.43             | -0.34        | -0.38             | -0.31            | 2.31          | 2.76       | 2.58           | 2.11        | -0.36            | -0.32         | 1.88              | -0.3      | -0.43          | -0.38        | -0.42   | -0.34    | -0.28 | -0.32     | 0.33      | -0.41        | -0.42          |
| Run1_ICUS22 | 1.41    | -0.38        | -0.34 | -0.4  | -0.33   | -0.43             | -0.41        | -0.42             | -0.41            | 2.31          | 2.92       | 2.78           | 2.11        | -0.39            | -0.34         | 1.78              | -0.42     | -0.47          | -0.55        | -0.44   | -0.41    | -0.42 | -0.39     | 0.33      | -0.42        | -0.44          |
| Run1_ICUS24 | 0.7     | -0.25        | -0.18 | -0.35 | -0.32   | -0.38             | -0.32        | -0.35             | -0.4             | 2.41          | 2.54       | 1.76           | 1.22        | -0.41            | -0.44         | 0.71              | -0.46     | -0.46          | -0.53        | -0.43   | -0.41    | -0.41 | -0.39     | 0.6       | -0.44        | -0.43          |
| Run1_NI-1   | 1.04    | -0.45        | -0.63 | -0.45 | -0.39   | -0.33             | -0.29        | -0.28             | -0.36            | 1.89          | 2.15       | 2.13           | 1.52        | -0.41            | -0.4          | 1.29              | -0.44     | -0.44          | -0.33        | -0.42   | -0.38    | -0.37 | -0.38     | 0.71      | -0.42        | -0.43          |
| Run1_NI-3   | 1.46    | -0.15        | -0.13 | -0.22 | -0.34   | -0.23             | -0.1         | -0.23             | -0.29            | 1.68          | 2.26       | 2.39           | 2.16        | -0.26            | -0.4          | 2.14              | -0.38     | -0.43          | -0.5         | -0.41   | -0.32    | -0.3  | -0.28     | 0.18      | -0.41        | -0.42          |
| Run1_NI-4   | 1.35    | -0.1         | -0.21 | -0.2  | -0.29   | -0.23             | -0.09        | -0.18             | -0.27            | 1.76          | 2.1        | 2.15           | 1.76        | -0.24            | -0.39         | 1.91              | -0.43     | -0.44          | -0.55        | -0.4    | -0.34    | -0.38 | -0.3      | -0.02     | -0.41        | -0.4           |
| Run1_NI-6   | 1.13    | -0.28        | -0.14 | -0.35 | -0.33   | -0.25             | -0.14        | -0.3              | -0.31            | 2.28          | 1.7        | 2.28           | 2.2         | -0.38            | -0.44         | 1.06              | -0.43     | -0.45          | -0.46        | -0.42   | -0.32    | -0.38 | -0.37     | -0.07     | -0.42        | -0.42          |
| Run2_NI-3   | 1.32    | -0.19        | -0.09 | -0.23 | -0.32   | -0.36             | -0.3         | -0.33             | -0.34            | 1.1           | 2          | 2.21           | 2.29        | -0.32            | -0.36         | 1.73              | -0.37     | -0.39          | -0.3         | -0.38   | -0.36    | -0.34 | -0.29     | 0.24      | -0.39        | -0.38          |
| Run2_NI-4   | 1.18    | -0.22        | -0.24 | -0.28 | -0.33   | -0.36             | -0.28        | -0.33             | -0.32            | 1.12          | 1.64       | 1.93           | 1.84        | -0.32            | -0.36         | 1.65              | -0.36     | -0.39          | -0.47        | -0.38   | -0.34    | -0.39 | -0.29     | 0.34      | -0.38        | -0.39          |
| Run2_NI-5   | 0.86    | -0.18        | -0.18 | -0.24 | -0.31   | -0.35             | -0.32        | -0.33             | -0.32            | 1.1           | 2.1        | 2.37           | 2.02        | -0.3             | -0.4          | 1.24              | -0.4      | -0.39          | -0.4         | -0.38   | -0.32    | -0.33 | -0.29     | 0.22      | -0.38        | -0.38          |
| Run2_NI-6   | 1.07    | -0.3         | -0.3  | -0.28 | -0.33   | -0.37             | -0.32        | -0.38             | -0.35            | 0.87          | 1.52       | 1.88           | 1.73        | -0.38            | -0.39         | 0.36              | -0.4      | -0.41          | -0.4         | -0.4    | -0.35    | -0.37 | -0.34     | -0.09     | -0.39        | -0.4           |

Supplemental Table 3: Median expression of each surface marker on each cell population.

|             |             | CD321 Median |              |       |       |         |                   |              |                   |                  |               |            |                |             |                  |               |                   |           |               |              |         |          |       |           |           |              |                |
|-------------|-------------|--------------|--------------|-------|-------|---------|-------------------|--------------|-------------------|------------------|---------------|------------|----------------|-------------|------------------|---------------|-------------------|-----------|---------------|--------------|---------|----------|-------|-----------|-----------|--------------|----------------|
|             |             | Ungated      | CD34-CD38low | HSCs  | MPP   | CMP/GMP | Myelo/Mono-Blasts | ProMonocytes | CD14neg Monocytes | Mature Monocytes | ProMyelocytes | Myelocytes | MetaMyelocytes | MatureGrans | ProErythroblasts | Erythroblasts | LateErythroblasts | PreBCells | Mature Bcells | Plasma Cells | T cells | NK cells | pDCs  | Basophils | Platelets | CD8+ T cells | CD8neg T cells |
| AML/RAEB-T  | Run1_MDS17  | 14.31        | 78.2         | 80.63 | 75.27 | 144.25  | 57.47             | 32.46        | 28.55             | 31.71            | 35.39         | 16.36      | 4.07           | 4.5         | 14.9             | 13.97         | 10.3              | 16.39     | 2.08          | 1.17         | 6.66    | 9.12     | 23.3  | 43.69     | 500.51    | 6.3          | 7.28           |
|             | Run2_MDS15* | 28.17        | 52.28        | 67.44 | 71.18 | 80.76   | 38.43             | 30.95        | 19.67             | 32.98            | 41.82         | 28.88      | 17.49          | 13.25       | 12.5             | 25.93         | 38.77             | 28.19     | 2.76          | 0.53         | 7.49    | 9.34     | 71.01 | 66.76     | 342.98    | 6.31         | 8.86           |
|             | Run2_MDS4   | 8.36         | 33.16        | 38.99 | 25.16 | 13.5    | 9.64              | 10.98        | 14.72             | 24.38            | 36.43         | 18.21      | 5.58           | 6.28        | 4.59             | 9.28          | 7.58              | 6.4       | 5.44          | 0.7          | 5.98    | 4.75     | 7.01  | 25.26     | 304.1     | 5.9          | 6.05           |
|             | Run1_MDS21  | 15.19        | 78.81        | 77.95 | 78.71 | 112.32  | 97.99             | 43.66        | 31.55             | 35.88            | 21.2          | 15.26      | 3.26           | 3.71        | 15.14            | 17.68         | 1106.2            | 9.77      | 3.04          | 1.98         | 9.42    | 11.73    | 35.9  | 33.44     | 1402.16   | 10.52        | 8.92           |
| Higher Risk | Run1_MDS3   | 16.22        | 71.08        | 76.96 | 66.13 | 108.42  | 95.52             | 48.77        | 41.88             | 49.49            | 23.63         | 14.29      | 4.37           | 6.52        | 16.12            | 18.28         | 37.24             | 11.11     | 3.15          | 1.62         | 11.18   | 13.19    | 20.48 | 49.89     | 928.19    | 11.99        | 10.88          |
|             | Run2_MDS13  | 16.06        | 59.31        | 61.78 | 56.64 | 88.14   | 75.31             | 30.47        | 38.47             | 46.44            | 34.74         | 22.67      | 5.78           | 5.35        | 7.18             | 10.18         | 6.35              | 9.36      | 1.87          | 0.22         | 8.17    | 8.54     | 7.44  | 43.76     | 519.95    | 8.67         | 7.92           |
|             | Run2_MDS16  | 6.04         | 54.42        | 53.04 | 50    | 54.64   | 6.6               | 6.58         | 13.04             | 13.71            | 34.58         | 12.03      | 4.15           | 4.01        | 29.44            | 6.89          | 6.87              | 9.83      | 0.91          | 1.14         | 7.89    | 9.73     | 8.52  | 13.98     | 1310.27   | 6.63         | 8.23           |
|             | Run2_MDS1   | 7.55         | 38.58        | 46.65 | 33.24 | 64.23   | 29.61             | 14.8         | 21.33             | 24.07            | 14.02         | 4.55       | 5.71           | 5.41        | 5.7              | 6.69          | 5.5               | 13.59     | 4.03          | 0.43         | 6.52    | 5.32     | 11.05 | 39.06     | 1056.48   | 6.76         | 6.48           |
|             | Run2_MDS21  | 11.58        | 73.58        | 77.36 | 73.18 | 109.85  | 83.47             | 17.48        | 25.65             | 28.53            | 30.74         | 18.1       | 3.27           | 3.01        | 8.92             | 8.35          | 6.33              | 9.31      | 3.43          | 1.67         | 8.41    | 10.31    | 32.26 | 24.75     | 1163.03   | 9.45         | 7.98           |
|             | Run2_MDS28* | 4.94         | 35.32        | 39.94 | 33.91 | 30.33   | 10.01             | 11.53        | 22                | 12.88            | 13.08         | 10.38      | 4.22           | 4.2         | 9.02             | 8.68          | 4.14              | 4.98      | 1.34          | 3.64         | 6.52    | 6.87     | 10.87 | 16.82     | 48.36     | 6.29         | 6.69           |
|             | Run2_MDS27  | 9.02         | 39.46        | 43.41 | 35.21 | 34.81   | 17.38             | 7.03         | 11.6              | 11.91            | 35.13         | 14.61      | 3.64           | 3.42        | 21.42            | 7.64          | 3.3               | 13.52     | 4.41          | 0.53         | 12.22   | 11.7     | 3.94  | 17.15     | 855.87    | 11.25        | 13.68          |
|             | Run2_MDS2   | 5.05         | 31.84        | 40.51 | 30.04 | 40.5    | 30.75             | 10.54        | 10.25             | 24.72            | 37.78         | 6.1        | 1.92           | 2.9         | 13.71            | 13.2          | 23.09             | 12.03     | 17.57         | 3.01         | 6.72    | 10.16    | 22.3  | 76.55     | 844.7     | 5.8          | 6.8            |
|             | Run2_MDS3   | 16.93        | 63.43        | 67.65 | 59.95 | 103.66  | 82.32             | 29.97        | 41.09             | 49.17            | 42.65         | 23.82      | 5.75           | 5.74        | 13.93            | 11.48         | 5.65              | 11.61     | 3.66          | 0.76         | 10.44   | 12.28    | 27.5  | 49.95     | 816.79    | 11.58        | 9.92           |
|             | Lower Risk  | Run1_MDS23   | 7.73         | 20.82 | 28.06 | 18.51   | 21.75             | 4.69         | 7.2               | 10.31            | 13.6          | 30.58      | 17.32          | 6.17        | 5.43             | 10.98         | 14.97             | 13.49     | 10            | 3.77         | 0.57    | 7.85     | 8.68  | 5.82      | 26.42     | 414.43       | 7.58           |
| Run1_MDS25  |             | 4.31         | 21.37        | 43.99 | 9.43  | 11.01   | 4.62              | 7.85         | 15.08             | 17.43            | 29.82         | 14.27      | 3.83           | 3.55        | 12.64            | 18.56         | 11.2              | 9.2       | 1.23          | 0.97         | 5.45    | 12.24    | 13    | 17.5      | 785.4     | 4.9          | 6.15           |
| Run1_MDS5   |             | 9.33         | 47.2         | 49.09 | 44.1  | 22.39   | 5.95              | 7.08         | 17.92             | 15.53            | 55.13         | 10.43      | 8.47           | 7.88        | 6.07             | 15.56         | 186.94            | 9.33      | 4.07          | -0.08        | 6.88    | 12.44    | 16.26 | 22.99     | 398.66    | 6.12         | 8.19           |
| Run1_MDS6   |             | 9.25         | 27.32        | 25.82 | 21.52 | 22.88   | 19.63             | 23.44        | 37.64             | 45.11            | 39.07         | 19.18      | 7.56           | 7.53        | 6.8              | 15.04         | 13.66             | 7.01      | 2.17          | 0.78         | 8.25    | 11.08    | 21.31 | 28        | 338.74    | 6.76         | 9.72           |
| Run1_MDS8   |             | 11.11        | 34.22        | 29.44 | 31.31 | 17.03   | 12.32             | 16.48        | 23.74             | 29.85            | 27.58         | 17.19      | 9.01           | 10.6        | 13.21            | 13.76         | 13.95             | 8.9       | 1.82          | 0.82         | 7.67    | 10.01    | 17.9  | 29.53     | 1405.68   | 8            | 7.58           |
| Run1_MDS9   |             | 8.57         | 28.09        | 30.01 | 24.68 | 28.7    | 20.48             | 22.04        | 37.82             | 40.62            | 26.43         | 15.62      | 6.12           | 6.17        | 12.15            | 14.32         | 76.03             | 10.03     | 2.56          | 0.87         | 7.51    | 10.78    | 14.85 | 18.8      | 604.34    | 7.34         | 7.61           |
| Run2_MDS12  |             | 6.15         | 7.71         | 37.24 | 18.34 | 42.05   | 3.32              | 7.05         | 12.12             | 16.33            | 22.16         | 21.64      | 6.24           | 4.07        | 3.45             | 4.11          | 3.24              | 8.22      | 2.4           | 1.43         | 5.18    | 6.73     | 4.91  | 21.27     | 700.45    | 5.21         | 5.16           |
| Run2_MDS14  |             | 4.96         | 30.52        | 41.64 | 21.28 | 18.41   | 4.26              | 6.09         | 10.55             | 13.24            | 14.12         | 8.99       | 4.42           | 4.34        | 3.47             | 5.21          | 5.66              | 3.71      | 1.71          | 0.07         | 9.11    | 4.79     | 19.24 | 19.57     | 3288.45   | 7.14         | 10.61          |
| Run2_MDS19  |             | 5.67         | 47.35        | 55.26 | 47.32 | 23.76   | 9.65              | 20.91        | 33.82             | 20.36            | 10.71         | 3.72       | 4.25           | 3.86        | 5.32             | 2.69          | 17.24             | 3.23      | 1.52          | 13.42        | 9.92    | 9.91     | 20.71 | 13.42     | 1353.16   | 9.38         | 15.22          |
| Run2_MDS20  |             | 6.27         | 28.05        | 28.86 | 35.02 | 20.04   | 4.22              | 3.84         | 8.03              | 12.29            | 31            | 19.71      | 5.37           | 4.73        | 3.04             | 8.28          | 6.62              | 9.89      | 5.8           | 0.59         | 7.79    | 3.83     | 10.04 | 13.98     | 1064.43   | 7.84         | 7.79           |
| Run2_MDS28* |             | 7.65         | 26.12        | 42.27 | 25.84 | 33.17   | 4.73              | 7.31         | 9.81              | 8.95             | 36.23         | 19.54      | 6.37           | 6.13        | 12.33            | 10.07         | 5.94              | 11.44     | 3.01          | 1.75         | 8.05    | 7.26     | 11.09 | 34.37     | 1404.74   | 7.27         | 8.77           |
| Run2_MDS5   |             | 6.27         | 37.84        | 94.19 | 38.83 | 37.65   | 3.86              | 4.44         | 15.24             | 12.81            | 44.66         | 5.26       | 5.29           | 5.79        | 2.09             | 11.29         | 30.74             | 8.09      | 3.03          | 0.33         | 5.97    | 10.64    | 16.94 | 23.93     | 564.48    | 3.61         | 6.94           |
| ICUS        |             | Run1_ICUS18  | 5.07         | 42.12 | 37.87 | 41.11   | 35.87             | 8.94         | 8.92              | 14.07            | 19.64         | 29.78      | 17.74          | 4.37        | 3.83             | 12.31         | 14.61             | 4.33      | 11            | 2.95         | 2.14    | 9.17     | 10.31 | 13.29     | 16.75     | 1054.15      | 8.14           |
|             | Run1_ICUS22 | 4.22         | 39.41        | 42.26 | 36.84 | 29.48   | 3.69              | 5.17         | 7.57              | 9.57             | 26.03         | 16.19      | 3.4            | 3.11        | 12.66            | 17.78         | 4.74              | 4.97      | 1.03          | 0.22         | 7.94    | 8.4      | 5.25  | 13.29     | 806.37    | 7.31         | 8.21           |
|             | Run1_ICUS24 | 5.14         | 33.07        | 32.76 | 30    | 13.68   | 6.71              | 8.93         | 11.81             | 12.2             | 23.41         | 14.98      | 4.74           | 3.79        | 8.55             | 10.86         | 38.64             | 3.17      | 0.71          | 0.43         | 3.3     | 3.87     | 5.97  | 16.52     | 3522.99   | 2.79         | 3.74           |
| Normal      | Run1_NI-1   | 5.72         | 30.45        | 48.48 | 26.57 | 12.11   | 6.66              | 9.7          | 15.01             | 15.84            | 29.77         | 16.08      | 5.35           | 4.2         | 11.28            | 15.77         | 8.09              | 2.41      | 1.35          | 0.78         | 6.81    | 8.33     | 12.98 | 25.03     | 1793.27   | 5.93         | 7.37           |
|             | Run1_NI-3   | 8.94         | 46.29        | 43.36 | 48.24 | 26.63   | 10.34             | 13.61        | 19.56             | 20.14            | 29.17         | 13.99      | 6.61           | 7.61        | 14.77            | 11.66         | 8.67              | 5.65      | 1.78          | 0.41         | 8.15    | 9.16     | 9.05  | 15.95     | 599.99    | 7.05         | 9              |
|             | Run1_NI-4   | 9.77         | 32.54        | 41.2  | 27.96 | 14.95   | 7.88              | 13.17        | 19.89             | 20.37            | 34.99         | 20.03      | 7.62           | 8.55        | 15.41            | 14.25         | 9.26              | 3.9       | 1.03          | 0.43         | 5.72    | 5.48     | 5.79  | 17.17     | 510.7     | 4.91         | 6.51           |
|             | Run1_NI-6   | 8.71         | 40.66        | 43.99 | 35.49 | 20.92   | 11.84             | 14.67        | 17.83             | 17.56            | 32.48         | 16.46      | 6.7            | 6.98        | 11.69            | 12.22         | 7.46              | 3.34      | 1.09          | 0.6          | 8.49    | 8.94     | 9.8   | 18.02     | 443.56    | 7.32         | 8.98           |
|             | Run2_NI-3   | 7.17         | 42.82        | 47.5  | 38.9  | 20.38   | 7.45              | 12.52        | 18.09             | 18.07            | 26.03         | 10.67      | 6.28           | 9.97        | 7.92             | 5.5           | 5.48              | 1.3       | 1.03          | 0.63         | 6.91    | 6.28     | 7.63  | 15.17     | 838.68    | 6.04         | 7.6            |
|             | Run2_NI-4   | 8.1          | 29.27        | 36.57 | 27.27 | 13.3    | 5.66              | 10.92        | 18.78             | 18.82            | 34.21         | 15.59      | 6.18           | 7.65        | 9.41             | 9.44          | 6.34              | 3.69      | 0.76          | 0.44         | 4.76    | 4.82     | 5.12  | 16.79     | 746.82    | 4.05         | 5.41           |
| Run2_NI-5   | 8.25        | 31.61        | 35.91        | 25.44 | 14.61 | 7.01    | 11.11             | 18.14        | 20.1              | 27.5             | 12.15         | 5.09       | 7.72           | 10.61       | 5.71             | 5.8           | 2.63              | 1.62      | 0.81          | 9.09         | 11.28   | 8.28     | 20    | 842.28    | 8.34      | 9.97         |                |
| Run2_NI-6   | 6.68        | 38.27        | 39.07        | 35.69 | 23.56 | 8.4     | 10.95             | 15.21        | 14.99             | 28.33            | 14.84         | 5.33       | 5.62           | 5.34        | 7.05             | 4.4           | 2.6               | 0.85      | 0.49          | 7.41         | 8.36    | 8.83     | 17.1  | 802.84    | 6.33      | 7.83         |                |

Supplemental Table 3: Median expression of each surface marker on each cell population.

|             |             | CD99 Median |              |        |        |         |                   |              |                   |                  |               |            |                |             |                  |               |                   |           |               |              |         |          |        |           |           |              |                |       |
|-------------|-------------|-------------|--------------|--------|--------|---------|-------------------|--------------|-------------------|------------------|---------------|------------|----------------|-------------|------------------|---------------|-------------------|-----------|---------------|--------------|---------|----------|--------|-----------|-----------|--------------|----------------|-------|
|             |             | Ungated     | CD34-CD38low | HSCs   | MPP    | CMP/GMP | Myelo/Mono-Blasts | ProMonocytes | CD14neg Monocytes | Mature Monocytes | ProMyelocytes | Myelocytes | MetaMyelocytes | MatureGrans | ProTryptroblasts | Erythroblasts | LateErythroblasts | PreBcells | Mature Bcells | Plasma Cells | T cells | NK cells | pDCs   | Basophils | Platelets | CD8+ T cells | CD8neg T cells |       |
| AML/RAEB-T  | Run1_MDS17  | 8.2         | 135.34       | 147.58 | 129.14 | 237.58  | 67.44             | 28.09        | 25.11             | 37.29            | 3.79          | 3.52       | 2.23           | 2.61        | 10.47            | 5.92          | 5.12              | 51.24     | 22.17         | 7.91         | 126.84  | 113.41   | 23.23  | 37.03     | 57.14     | 130.83       | 120.19         |       |
|             | Run2_MDS15* | 13.05       | 156.02       | 228.89 | 220.04 | 190.6   | 31.49             | 13.56        | 22.52             | 71.06            | 8.67          | 5.64       | 3.55           | 2.46        | 71               | 13.35         | 16.79             | 21.91     | 30.93         | 76.67        | 182.69  | 147.09   | 103.57 | 37.16     | 229.61    | 178.73       | 185.37         |       |
|             | Run2_MDS4   | 5.36        | 312.15       | 257.3  | 356.98 | 86.89   | 36.8              | 59.96        | 32.33             | 34.72            | 3.18          | 2.2        | 0.48           | 0.47        | 2.59             | 1.39          | 2.63              | 45.93     | 75.88         | 7.4          | 179.08  | 165.56   | 130.48 | 26.97     | 84.77     | 218.74       | 138.05         |       |
|             | Run1_MDS21  | 12.44       | 115.12       | 133.08 | 109.18 | 163.17  | 131.88            | 43.08        | 30.02             | 31.44            | 1.73          | 1.64       | 0.66           | 0.92        | 7.95             | 9.24          | 21.61             | 19.41     | 14.49         | 9.02         | 45.19   | 45.7     | 47.62  | 26.63     | 20.44     | 61.38        | 39.18          |       |
| Higher Risk | Run1_MDS3   | 9.22        | 156.72       | 166.3  | 147.35 | 227.34  | 174.64            | 52.29        | 30.07             | 44.34            | 1.79          | 1.39       | 0.79           | 1.44        | 11.44            | 11.25         | 11.88             | 25.75     | 21.43         | 5.61         | 81.32   | 56.17    | 67.22  | 15.7      | 25.45     | 95.88        | 74.51          |       |
|             | Run2_MDS13  | 11.55       | 213.56       | 243.33 | 192.49 | 232.95  | 168.55            | 24.06        | 36.23             | 50.08            | 4.14          | 3.64       | 2.06           | 2.25        | 24.18            | 5.6           | 4.15              | 33.22     | 21.14         | 23.24        | 81.08   | 67.03    | 150.11 | 13.2      | 21.08     | 102.17       | 71.12          |       |
|             | Run2_MDS16  | 2.15        | 195.77       | 181.43 | 172.41 | 284.64  | 51.38             | 21.82        | 47.57             | 59.76            | 1.5           | 1.24       | 0.33           | 0.33        | 101.62           | 30.69         | 6.82              | 90.8      | 20.76         | 18.46        | 87.95   | 178.15   | 174.56 | 12.63     | 239.68    | 89.36        | 87.63          |       |
|             | Run2_MDS1   | 15.96       | 59.98        | 51.63  | 55.75  | 77.54   | 49.62             | 56.06        | 82.27             | 69.44            | 1.14          | 0.39       | 0.23           | 0.28        | 12.33            | 3.75          | 2.8               | 55.2      | 28.22         | 3.19         | 58.64   | 93.99    | 56.18  | 9.35      | 282.65    | 94.83        | 51.66          |       |
|             | Run2_MDS21  | 8.3         | 120.87       | 135.68 | 117.86 | 168.77  | 113.51            | 7.71         | 12.17             | 16.66            | 1.65          | 1.51       | 0.52           | 0.66        | 10.79            | 4.52          | 4.68              | 21.03     | 15.27         | 3.54         | 45.49   | 45.01    | 71.46  | 18.95     | 25.12     | 63.82        | 38.95          |       |
|             | Run2_MDS26* | 0.45        | 48.59        | 54.4   | 45.85  | 67.79   | 11.98             | 6.68         | 5.78              | 7.84             | 0.72          | 0.69       | 0              | -0.03       | 11.49            | 2.56          | 1.31              | 3.41      | 5             | 2.48         | 24.34   | 35.35    | 15.06  | 5.88      | 3.99      | 39.71        | 17.63          |       |
|             | Run2_MDS27  | 33.67       | 98.94        | 94.53  | 93.45  | 96.24   | 59.65             | 40.05        | 15.78             | 21.8             | 1.75          | 1.31       | 0.21           | 0.15        | 33.47            | 33.41         | 10.92             | 144.56    | 37.95         | 10.54        | 214.05  | 204.11   | 6.03   | 19.85     | 321.73    | 232.22       | 190.22         |       |
|             | Run2_MDS2   | 5.24        | 457.97       | 526.81 | 471.86 | 437.85  | 224.49            | 80.18        | 11.33             | 24               | 12.1          | 0.74       | 0.46           | 0.7         | 44.39            | 11.64         | 52.09             | 127.15    | 75.35         | 3.59         | 109.91  | 153.66   | 42.32  | 60.84     | 126.84    | 162.62       | 106.5          |       |
|             | Run2_MDS3   | 7.48        | 173.37       | 209.44 | 153.96 | 237.67  | 141.17            | 13.52        | 13.05             | 30.51            | 2.53          | 2.01       | 1.05           | 1.46        | 37.7             | 7.56          | 3.29              | 31.98     | 21.02         | 8.28         | 87.54   | 73.54    | 53.98  | 13.39     | 28.99     | 109.76       | 78.52          |       |
|             | Lower Risk  | Run1_MDS23  | 0.67         | 5.3    | 7.15   | 4.95    | 6.18              | 1.61         | 2.23              | 1.44             | 2.05          | 1.3        | 0.87           | 0.1         | -0.05            | 2.43          | 2.92              | 2.34      | 3.7           | 5.27         | 1.31    | 22.18    | 6.31   | 6.55      | 1.85      | 22.23        | 29.38          | 19.17 |
|             |             | Run1_MDS25  | 0.55         | 27.29  | 82.76  | 14.89   | 61.44             | 12.65        | 40.79             | 28.64            | 15.25         | 1.71       | 1.07           | 0.08        | 0.09             | 6.83          | 10.19             | 2.89      | 38.22         | 9.42         | 3.77    | 99.52    | 58.9   | 79.1      | 7.31      | 44.66        | 106.39         | 92.27 |
|             |             | Run1_MDS5   | 2.4          | 140.81 | 196.6  | 148.48  | 127.67            | 58.12        | 24.81             | 12               | 26.28         | 2.66       | 1.75           | 1.11        | 1.36             | 5.58          | 15.37             | 32.3      | 11.6          | 21.99        | 6.54    | 123.5    | 240.12 | 23.02     | 19.99     | 50.77        | 178.09         | 97.62 |
| Run1_MDS6   |             | 1.49        | 103.99       | 82.8   | 55.53  | 94.81   | 35.14             | 25.58        | 27.17             | 24.84            | 2.34          | 1.75       | 0.7            | 0.62        | 24.5             | 18.99         | 4.75              | 24.37     | 17.96         | 5.35         | 84.8    | 108.58   | 67.98  | 11.74     | 380.97    | 100.53       | 73.54          |       |
| Run1_MDS8   |             | 1.66        | 83.3         | 98.54  | 69.5   | 136.09  | 32.67             | 14.38        | 51.24             | 49.59            | 2.18          | 1.21       | 0.64           | 0.65        | 41.1             | 36.36         | 18.57             | 35.8      | 22.71         | 4.04         | 41.77   | 107.22   | 43.5   | 16.47     | 167.16    | 51.57        | 39.69          |       |
| Run1_MDS9   |             | 1.88        | 115.13       | 133.13 | 84.43  | 134.85  | 48.82             | 7.57         | 19.4              | 24.64            | 1.52          | 1.21       | 0.23           | 0.16        | 9.41             | 8.2           | 25.33             | 52.91     | 13.58         | 7.7          | 53      | 80.54    | 9.82   | 10.43     | 49.95     | 82.75        | 39.26          |       |
| Run2_MDS12  |             | 0.84        | 15.76        | 58.17  | 22.26  | 56.3    | 15.36             | 28.65        | 28.93             | 40.16            | 0.98          | 1.37       | 0.33           | 0.1         | 9.49             | 9.76          | 3.66              | 22.94     | 14.21         | 5.57         | 37.31   | 60.57    | 43.97  | 10.39     | 65.02     | 58.63        | 27.91          |       |
| Run2_MDS14  |             | 0.54        | 30.89        | 22.8   | 53.25  | 56.16   | 5.88              | 6.46         | 9.74              | 12.87            | 0.52          | 0.49       | 0.11           | 0.08        | 4.21             | 3.58          | 0.86              | 5.28      | 11.15         | 1.64         | 75.21   | 30.33    | 119.43 | 5.79      | 73.19     | 70.46        | 77.56          |       |
| Run2_MDS19  |             | 0.57        | 62.84        | 64.46  | 60.61  | 69.38   | 12.99             | 17.77        | 13.35             | 17.51            | 0.98          | 0.71       | 0              | -0.01       | 8.66             | 9.26          | 3.17              | 44.11     | 16.96         | 5.34         | 80.88   | 62.17    | 115.64 | 9.45      | 83.94     | 96.83        | 74.89          |       |
| Run2_MDS20  |             | 1.96        | 63.88        | 70.14  | 55.43  | 102.35  | 6.18              | 7.59         | 12.99             | 19.78            | 1.51          | 1.17       | 0.13           | 0.05        | 18.87            | 8.53          | 1.04              | 59        | 32.03         | 12.73        | 72.98   | 41.24    | 7.68   | 6.63      | 109.27    | 138.95       | 67.92          |       |
| Run2_MDS28* |             | 0.42        | 23.2         | 31.19  | 18.02  | 38.55   | 1.79              | 3.07         | 2.06              | 4.81             | 1.08          | 0.82       | -0.01          | -0.07       | 24.35            | 7.9           | 0.81              | 10.59     | 7.48          | 5.13         | 38.87   | 24.18    | 7.14   | 5.96      | 90.77     | 48.37        | 31.81          |       |
| Run2_MDS5   |             | 1.81        | 124.29       | 284.12 | 161.92 | 147.83  | 58.81             | 19.51        | 11.88             | 26.62            | 2.05          | 1.28       | 0.87           | 1.18        | 11.57            | 14.09         | 9.02              | 12.63     | 23.15         | 8.71         | 144.14  | 300.41   | 52.38  | 22.27     | 77.18     | 202.42       | 115.17         |       |
| ICUS        | Run1_ICUS18 | 0.58        | 55.6         | 44.61  | 46.06  | 72.86   | 7.66              | 10.99        | 23.16             | 18.25            | 1.47          | 1.14       | 0.04           | -0.07       | 19.09            | 18.1          | 0.13              | 49.14     | 15.4          | 2.78         | 58.77   | 73.97    | 110.68 | 6.31      | 54.83     | 88.46        | 54             |       |
|             | Run1_ICUS22 | 0.27        | 13.8         | 14.09  | 12.23  | 17.37   | 2.06              | 2.77         | 2.93              | 3.84             | 0.98          | 0.84       | -0.06          | -0.19       | 3.09             | 3.99          | 0.44              | 4.16      | 3.13          | 1.5          | 22.21   | 12.6     | 2.5    | 2.76      | 25.34     | 25.5         | 20.92          |       |
|             | Run1_ICUS24 | 0.85        | 22.59        | 18.67  | 22.44  | 27.05   | 6.38              | 7.67         | 4.83              | 5.47             | 1.05          | 0.9        | 0.16           | -0.05       | 4.16             | 3.88          | 9.38              | 2.66      | 3.84          | 1.04         | 27.05   | 14.58    | 22.96  | 4.83      | 34.7      | 26.25        | 29.06          |       |
| Normal      | Run1_N1-1   | 0.69        | 37.03        | 36.1   | 32.3   | 63.29   | 8.86              | 10.91        | 12.68             | 16.66            | 1.45          | 1.03       | 0.2            | -0.05       | 7.59             | 8.82          | 1.15              | 3.71      | 5.12          | 3.13         | 22.98   | 34.74    | 62.13  | 4.88      | 75.5      | 22.38        | 23.31          |       |
|             | Run1_N1-3   | 1.76        | 105.16       | 92.6   | 89.13  | 116.12  | 30.65             | 34.11        | 31.18             | 30.59            | 2.42          | 1.79       | 0.74           | 0.72        | 33.62            | 9.82          | 1.14              | 14.35     | 11.58         | 4.84         | 56.11   | 93.3     | 86.88  | 7.71      | 46.07     | 58.85        | 54.53          |       |
|             | Run1_N1-4   | 2.11        | 90.51        | 148.13 | 81.81  | 134.54  | 34.86             | 41.54        | 35.74             | 38.38            | 3.55          | 2.66       | 1.02           | 1.03        | 42.84            | 10.48         | 1.37              | 14.55     | 18.9          | 6.44         | 75.06   | 78.1     | 94.84  | 16.74     | 67.49     | 63.81        | 84.07          |       |
|             | Run1_N1-6   | 1.11        | 39.04        | 39.5   | 34.5   | 64.42   | 21.23             | 26.71        | 21.58             | 26.97            | 2.18          | 1.44       | 0.41           | 0.35        | 10.26            | 6.26          | 1.1               | 6.01      | 8.04          | 1.86         | 42.44   | 57.78    | 40.95  | 5.71      | 32.81     | 53.55        | 38.41          |       |
|             | Run2_N1-3   | 1.31        | 99.34        | 110.88 | 91.62  | 104.28  | 25.93             | 31.14        | 24.25             | 31.46            | 1.97          | 1.48       | 0.54           | 0.54        | 27.38            | 7.94          | 0.69              | 12.62     | 12.05         | 6.02         | 61.3    | 107.4    | 105.7  | 8.08      | 65.02     | 64.49        | 59.6           |       |
|             | Run2_N1-4   | 1.75        | 115.66       | 153.56 | 92.23  | 132.79  | 25.76             | 36.3         | 28.62             | 40.21            | 3.05          | 1.99       | 0.77           | 0.93        | 33.8             | 7.72          | 0.94              | 13.5      | 19.42         | 6.32         | 83.72   | 88.69    | 113.58 | 18.13     | 91.83     | 72.78        | 91.98          |       |
| Run2_N1-5   | 1.75        | 138.47      | 160.69       | 113.96 | 184.9  | 37.09   | 55.61             | 49.36        | 51.38             | 2.08             | 1.15          | 0.4        | 0.63           | 18.31       | 5.96             | 0.85          | 9.51              | 21.21     | 7.48          | 71.82        | 169.34  | 140.03   | 10.78  | 56.81     | 63.67     | 78.41        |                |       |
| Run2_N1-6   | 0.69        | 31.86       | 34.3         | 29.5   | 55.19  | 10.8    | 16.9              | 13.23        | 20.35             | 1.65             | 1.1           | 0.21       | 0.18           | 5.56        | 3.54             | 0.77          | 4.79              | 7.2       | 1.58          | 38.02        | 58.01   | 39.82    | 4.43   | 50.77     | 54.05     | 33.61        |                |       |

Supplemental Table 3: Median expression of each surface marker on each cell population.

|             |             | CD13 Median |              |      |      |         |                   |              |                   |                  |               |            |                |             |                  |               |                   |           |               |              |         |          |       |           |           |              |                |
|-------------|-------------|-------------|--------------|------|------|---------|-------------------|--------------|-------------------|------------------|---------------|------------|----------------|-------------|------------------|---------------|-------------------|-----------|---------------|--------------|---------|----------|-------|-----------|-----------|--------------|----------------|
|             |             | Ungated     | CD34-CD38low | HSCs | MPP  | CMP/GMP | Myelo/Mono-Blasts | ProMonocytes | CD14neg Monocytes | Mature Monocytes | ProMyelocytes | Myelocytes | MetaMyelocytes | MatureGrans | ProErythroblasts | Erythroblasts | LateErythroblasts | PreBCells | Mature Bcells | Plasma Cells | T cells | NK cells | pDCs  | Basophils | Platelets | CD8+ T cells | CD8neg T cells |
| AML/BAEB-T  | Run1_MDS17  | 1.53        | 3.82         | 4.57 | 3.6  | 4.77    | 2.72              | 3.22         | 2.8               | 7.17             | 0.55          | 0.43       | 1.16           | 2.39        | 0.26             | -0.1          | 0.01              | 2.97      | 0.83          | -0.19        | 3.02    | 2.54     | 1.87  | 9.53      | 1.75      | 2.93         | 3.14           |
|             | Run2_MDS15* | 3.03        | 4.99         | 5.73 | 4.44 | 3.59    | 3.51              | 2.43         | 4.13              | 7.04             | 3.48          | 1.32       | 1.56           | 2.57        | 0.88             | 1.65          | 3.86              | 6.77      | 0.62          | -0.12        | 2.6     | 2.1      | 4.58  | 5.6       | 3.88      | 2.49         | 2.74           |
|             | Run2_MDS4   | 0.87        | 4.3          | 3.99 | 3.26 | 1.25    | 1.19              | 1.34         | 1.22              | 2.4              | 0.22          | -0.06      | 0.14           | 0.57        | -0.22            | -0.24         | -0.68             | 1.37      | 1.55          | -0.21        | 2.68    | 1.78     | 2.13  | 10.12     | 1.76      | 2.96         | 2.36           |
| Higher Risk | Run1_MDS21  | 1.4         | 7.82         | 8.79 | 7.43 | 7.71    | 6.77              | 5.57         | 4.4               | 6.65             | -0.09         | 0.09       | 0.93           | 1.79        | 0.04             | 0.33          | 1.16              | 1.77      | 1.01          | -0.07        | 2.66    | 2.1      | 3.24  | 10.86     | 0.99      | 2.8          | 2.61           |
|             | Run1_MDS3   | 1.07        | 7.11         | 7.84 | 6.55 | 6.23    | 5.73              | 4.86         | 4.47              | 9.39             | -0.02         | -0.02      | 0.75           | 1.73        | 0.22             | 0.4           | 0.76              | 1.84      | 1             | -0.02        | 2.8     | 1.81     | 2.51  | 14.81     | 1.01      | 2.93         | 2.73           |
|             | Run2_MDS13  | 1.2         | 5.41         | 6.56 | 5.02 | 5.26    | 4.15              | 2.05         | 2.49              | 4.55             | 0.35          | 0.31       | 0.84           | 1.65        | 0.35             | -0.11         | -0.04             | 1.69      | 0.86          | -0.01        | 2.15    | 1.48     | 3.32  | 10.12     | 0.81      | 2.3          | 2.09           |
|             | Run2_MDS16  | 0.64        | 5.14         | 5.51 | 4.14 | 5.12    | 3.99              | 6.07         | 7.54              | 13.34            | -0.1          | -0.17      | -0.14          | 0.31        | 1.79             | 0.47          | 0.56              | 3.48      | 0.33          | -0.17        | 1.99    | 2.08     | 2.87  | 6.13      | 1.76      | 1.94         | 2              |
|             | Run2_MDS1   | 1.78        | 8            | 6.49 | 7.83 | 9.35    | 4.41              | 4.96         | 13.5              | 23.97            | -0.03         | 0.27       | 1.86           | 2.62        | 0.29             | -0.09         | -0.04             | 3.45      | 1             | -0.25        | 1.56    | 1.39     | 1.38  | 8.64      | 1.85      | 1.87         | 1.49           |
|             | Run2_MDS21  | 0.81        | 6.74         | 8.17 | 6.34 | 6.77    | 5.07              | 1.44         | 1.77              | 3.95             | -0.09         | -0.08      | 0.32           | 0.92        | 0                | -0.19         | -0.14             | 1.29      | 0.62          | -0.23        | 1.93    | 1.25     | -0.08 | 10.24     | 0.72      | 2.07         | 1.89           |
|             | Run2_MDS26* | 0.1         | 4.75         | 5.1  | 4.41 | 5.18    | 3.12              | 2.19         | 5.73              | 6.08             | -0.09         | -0.05      | 0.29           | 0.73        | 1.01             | -0.22         | -0.27             | 1.3       | 0.07          | 0.27         | 1.39    | 0.95     | 2.32  | 2.78      | 0.24      | 1.66         | 1.22           |
|             | Run2_MDS27  | 0.9         | 3            | 3.75 | 2.27 | 2.36    | 1.54              | 2            | 2.7               | 6.11             | 0.06          | -0.17      | -0.22          | 0.08        | 0.7              | 0.4           | 0.15              | 3.58      | 0.85          | -0.27        | 3.04    | 2.58     | 2.41  | 4.48      | 1.25      | 3.17         | 2.89           |
|             | Run2_MDS2   | 1.62        | 3.61         | 5.46 | 2.85 | 3.95    | 2.28              | 1.18         | 1.41              | 3.98             | 2.04          | 0.47       | 1.13           | 1.61        | 2.01             | 1.6           | 1.61              | 2.69      | 1.26          | -0.63        | 2.2     | 1.82     | 1.57  | 3.97      | 1.77      | 2.51         | 2.18           |
|             | Run2_MDS3   | 0.73        | 5.22         | 5.62 | 4.94 | 5.21    | 3.79              | 1.47         | 1.53              | 5.71             | 0.13          | 0.06       | 0.25           | 0.97        | 0.62             | -0.06         | -0.19             | 1.33      | 0.82          | -0.3         | 2.1     | 1.15     | 4.47  | 12.03     | 0.8       | 2.28         | 2.03           |
| Lower Risk  | Run1_MDS23  | 0.37        | 2.09         | 3.45 | 1.83 | 1.82    | 1.91              | 5.73         | 5.58              | 9.14             | -0.14         | -0.23      | -0.06          | 0.61        | -0.21            | -0.13         | 0.88              | 2.51      | 1.12          | 0.34         | 1.72    | 0.5      | 2.31  | 10.71     | 0.98      | 1.93         | 1.67           |
|             | Run1_MDS25  | 2.06        | 4.36         | 3.38 | 2.97 | 2.14    | 4.53              | 6.98         | 7.08              | 12.63            | 0.21          | 0.3        | 1.46           | 1.92        | 0.04             | 0.51          | 2.03              | 5.78      | -0.03         | -0.29        | 2.57    | 1.56     | 2.66  | 4.04      | 1.9       | 2.63         | 2.51           |
|             | Run1_MDS5   | 1.94        | 4.88         | 3.97 | 6.59 | 2.7     | 0.71              | 1.91         | 4.44              | 6.06             | 0.47          | 1.14       | 1.13           | 2.18        | 0.26             | 0.73          | 1.93              | 3.14      | 0.82          | -0.17        | 2.16    | 3.54     | 3.45  | 3.26      | 1.71      | 2.24         | 2.15           |
|             | Run1_MDS6   | 0.96        | 3.41         | 3.47 | 2.75 | 2.69    | 1.96              | 2.42         | 2.5               | 5.05             | 0.06          | -0.13      | -0.07          | 1.1         | 0.45             | 0.37          | 0.99              | 1.52      | 0.38          | -0.33        | 2.15    | 2.2      | 3.51  | 7.75      | 1.94      | 2.28         | 2.07           |
|             | Run1_MDS8   | 0.93        | 4.23         | 5.2  | 2.66 | 2.78    | 2.48              | 3.14         | 3.99              | 6.98             | -0.06         | -0.12      | 0.4            | 0.77        | 0.64             | 0.93          | 1.06              | 2.35      | 0.36          | -0.39        | 1.54    | 2.01     | 1.74  | 3.78      | 1.9       | 1.82         | 1.41           |
|             | Run1_MDS9   | 0.91        | 4.37         | 5.69 | 3.71 | 4.43    | 4.16              | 9.15         | 10.67             | 16.3             | -0.09         | -0.17      | 0.23           | 0.87        | 0.26             | 0.09          | 1.14              | 2.98      | 0.61          | -0.38        | 2.11    | 1.9      | 5.51  | 4.7       | 1.45      | 2.43         | 1.93           |
|             | Run2_MDS12  | 0.42        | 0.98         | 3.11 | 1.25 | 2.56    | 1.54              | 3.37         | 4.26              | 9.26             | -0.11         | -0.08      | 0.19           | 0.88        | -0.04            | -0.05         | 0.13              | 2.77      | 0.79          | 0.38         | 1.57    | 1.21     | 1.14  | 3.28      | 1.13      | 1.8          | 1.4            |
|             | Run2_MDS14  | 1.12        | 6.32         | 4.72 | 5.7  | 4.72    | 13.32             | 14.08        | 7.65              | 17.23            | 0.59          | -0.09      | -0.09          | 1.31        | -0.08            | -0.2          | 1                 | 0.59      | 0.1           | -0.4         | 1.79    | 0.55     | 1.43  | 4.56      | 0.71      | 1.74         | 1.81           |
|             | Run2_MDS19  | 0.18        | 3.68         | 4.65 | 3.38 | 4.06    | 1.88              | 2.61         | 2.96              | 5.36             | -0.17         | -0.22      | -0.19          | 0.37        | 0.02             | -0.14         | 3.31              | 0.74      | -0.01         | 1.97         | 1.32    | 2.12     | 3.99  | 1.26      | 2.21      | 1.9          | 1.26           |
|             | Run2_MDS20  | 0.8         | 2.16         | 1.02 | 2.81 | 3.35    | 0.48              | 0.85         | 1.41              | 3.34             | -0.08         | -0.18      | -0.16          | 0.4         | -0.06            | 0.08          | 0.46              | 2.39      | 0.95          | -0.51        | 1.84    | 0.83     | 1.57  | 3.85      | 1.48      | 2.41         | 1.79           |
| Run2_MDS28* | 0.29        | 3.82        | 5.43         | 3.26 | 4.23 | 0.65    | 1.46              | 4.37         | 9.69              | -0.1             | -0.18         | -0.13      | 0.41           | 0.6         | -0.04            | -0.02         | 3.43              | -0.04     | -0.38         | 1.05         | 0.4     | 3.37     | 6.82  | 0.71      | 1.21      | 0.93         |                |
| Run2_MDS5   | 1.41        | 7.01        | 2.26         | 6.28 | 2.38 | 0.89    | 1.12              | 3.61         | 4.75              | 0.32             | 0.6           | 0.67       | 1.65           | -0.11       | 0.62             | 1.56          | 2.39              | 0.23      | -0.34         | 2.04         | 3.19    | 2.79     | 3.07  | 1.36      | 2.2       | 1.97         |                |
| ICUS        | Run1_ICUS18 | 0.87        | 4.86         | 5.83 | 3.69 | 2.61    | 3.26              | 4.45         | 3.9               | 7.23             | -0.12         | -0.16      | -0.13          | 0.67        | 0.56             | 0.62          | 0.51              | 3.4       | 0.57          | -0.02        | 2.02    | 1.72     | 3.37  | 4.94      | 1.77      | 2.41         | 1.94           |
|             | Run1_ICUS22 | 0.48        | 3.55         | 3.84 | 2.92 | 3.37    | 3.55              | 10.5         | 7.06              | 13.86            | -0.16         | -0.24      | -0.27          | 0.43        | -0.12            | 0.01          | 0.31              | 1.4       | -0.14         | -0.17        | 1.18    | 0.29     | 19.74 | 7.34      | 1.52      | 1.23         | 1.17           |
|             | Run1_ICUS24 | 0.47        | 5.76         | 7.01 | 5.03 | 4.24    | 3.59              | 5.8          | 7.97              | 16.97            | -0.1          | -0.19      | -0.14          | 0.63        | -0.1             | -0.17         | 0.67              | 0.37      | 0.19          | -0.12        | 1.22    | 0.19     | 2.02  | 5.83      | 1.14      | 1.18         | 1.24           |
| Normal      | Run1_NI-1   | 0.53        | 4.19         | 4.86 | 3.37 | 2.65    | 2.72              | 5.07         | 4.16              | 8.69             | -0.01         | -0.18      | -0.19          | 0.78        | 0.05             | 0.2           | 0.56              | 0.25      | -0.08         | 0.01         | 1.29    | 0.85     | 3.01  | 6.53      | 1.48      | 1.38         | 1.25           |
|             | Run1_NI-3   | 1.15        | 6.1          | 6.38 | 5.46 | 4.72    | 4.61              | 5.01         | 6.23              | 13.46            | 0.3           | 0.1        | 0.46           | 2.14        | 1.06             | 0.3           | 1.09              | 1.21      | 0.08          | -0.23        | 1.79    | 2.19     | 2.61  | 7.56      | 1.69      | 1.74         | 1.83           |
|             | Run1_NI-4   | 1.14        | 4.64         | 5.84 | 3.18 | 3.5     | 2.94              | 3.49         | 4.18              | 7.37             | 0.45          | 0.31       | 0.61           | 1.96        | 1.08             | 0.35          | 0.97              | 0.91      | 0.37          | -0.17        | 2.18    | 1.64     | 1.91  | 4.57      | 1.97      | 2.36         | 1.97           |
|             | Run1_NI-6   | 1.15        | 3.63         | 4.49 | 2.72 | 3.37    | 4.06              | 5.69         | 7.41              | 17.09            | 0.42          | 0.43       | 0.61           | 2.28        | 0.13             | -0.06         | 0.79              | 0.51      | -0.02         | -0.34        | 1.96    | 1.37     | 3.3   | 5.48      | 1.17      | 2.15         | 1.88           |
|             | Run2_NI-3   | 0.69        | 4.95         | 6.5  | 4.12 | 3.65    | 2.43              | 3.52         | 6.27              | 13.83            | 0.07          | -0.01      | 0.3            | 1.48        | 0.6              | 0.11          | 0.6               | 0.99      | 0.08          | -0.24        | 1.51    | 1.84     | 2.26  | 5.19      | 1.3       | 1.52         | 1.51           |
|             | Run2_NI-4   | 0.58        | 4.29         | 5.38 | 3.57 | 3.06    | 1.31              | 1.91         | 3.19              | 6.57             | 0.21          | 0.02       | 0.17           | 1.17        | 0.65             | 0.09          | 0.38              | 0.72      | 0.26          | -0.29        | 1.81    | 1.47     | 1.83  | 3.07      | 1.94      | 1.72         | 1.89           |
| Run2_NI-5   | 0.61        | 3.97        | 4.29         | 3.29 | 3.02 | 1.43    | 2.22              | 3.51         | 7.36              | -0.07            | -0.11         | -0.05      | 1.1            | 0.54        | -0.1             | 0.37          | 0.35              | 0.5       | -0.14         | 1.76         | 2.48    | 2.16     | 3.42  | 1.33      | 1.7       | 1.83         |                |
| Run2_NI-6   | 0.59        | 2.89        | 3.56         | 2.46 | 3.46 | 2.28    | 3.85              | 8.11         | 18.65             | 0.08             | 0             | 0.2        | 1.3            | -0.05       | -0.18            | 0             | 0.65              | 0.03      | -0.21         | 1.85         | 1.2     | 2.92     | 4.25  | 1.09      | 2.11      | 1.76         |                |

Supplemental Table 3: Median expression of each surface marker on each cell population.

|             |             | CXCR4 Median |              |       |       |         |                   |              |                   |                  |               |            |                |             |                  |               |                   |           |               |              |         |          |       |           |           |              |                |
|-------------|-------------|--------------|--------------|-------|-------|---------|-------------------|--------------|-------------------|------------------|---------------|------------|----------------|-------------|------------------|---------------|-------------------|-----------|---------------|--------------|---------|----------|-------|-----------|-----------|--------------|----------------|
|             |             | Ungated      | CD34+CD38low | HSCs  | MPP   | CMP/GMP | Myelo/Mono-Blasts | ProMonocytes | CD14neg Monocytes | Mature Monocytes | ProMyelocytes | Myelocytes | MetaMyelocytes | MatureGrans | ProErythroblasts | Erythroblasts | LateErythroblasts | PreBcells | Mature Bcells | Plasma Cells | T cells | NK cells | pDCs  | Basophils | Platelets | CD8+ T cells | CD8neg T cells |
| AML/RAEB-T  | Run1_MDS17  | 0.67         | 0.22         | 0.34  | 0.14  | 0.41    | 0.14              | 3.02         | 1.44              | 0.48             | 0.69          | 2.17       | 1.99           | 2.22        | -0.31            | -0.42         | -0.19             | 0.9       | 3.99          | 1.37         | 1.01    | 0.04     | 9.46  | 7.65      | 16.62     | 0.94         | 1.11           |
|             | Run2_MDS15* | 1.21         | -0.11        | -0.22 | -0.21 | 0.02    | 1.57              | 4.79         | 0.85              | 0.31             | 4             | 5.12       | 3.66           | 0.79        | -0.02            | 0.56          | 1.31              | 1.06      | 2.92          | 0.48         | 0.02    | -0.04    | 0.8   | 7.23      | 3.03      | -0.1         | 0.33           |
|             | Run2_MDS4   | 0.35         | -0.2         | -0.22 | -0.28 | -0.23   | 0.6               | 0.08         | -0.07             | 0.11             | 1.83          | 1.95       | 0.91           | 0.54        | -0.29            | -0.35         | 0.18              | 0.98      | 2.15          | 0.91         | 0       | -0.13    | 0.68  | 8.42      | 19.46     | -0.04        | 0.1            |
| Higher Risk | Run1_MDS21  | -0.08        | -0.08        | -0.1  | -0.09 | 0.06    | 0.14              | 1.06         | 0.64              | 0.25             | -0.37         | -0.18      | -0.21          | -0.16       | -0.39            | -0.28         | 49.01             | 2.31      | 1.85          | 1.24         | 0.53    | -0.03    | 13.25 | 7.03      | 66.87     | 0.04         | 0.75           |
|             | Run1_MDS3   | -0.16        | -0.13        | -0.13 | -0.17 | -0.03   | 0.03              | 0.23         | -0.14             | 0.55             | -0.37         | -0.32      | -0.3           | -0.12       | -0.35            | -0.29         | 1.41              | 2.22      | 2.54          | 1.55         | 0.91    | 0.11     | 6.06  | 10.58     | 48.51     | 0.55         | 1.06           |
|             | Run2_MDS13  | 0.2          | -0.14        | -0.13 | -0.15 | 0       | 0.13              | 1.03         | 0.5               | 1.31             | 0.1           | 0.74       | 0.25           | 0.26        | -0.05            | -0.34         | -0.17             | 4.12      | 2.68          | 1.09         | 0.88    | -0.05    | 1.13  | 3.07      | 32.84     | 0.42         | 1.14           |
|             | Run2_MDS16  | 0.06         | 0.35         | 0.51  | 0.22  | 0.25    | -0.03             | -0.12        | 0.06              | 0.05             | 2.3           | 0.99       | 0.1            | -0.19       | 0.42             | -0.36         | -0.01             | 0.73      | 2.67          | 0.86         | 0.96    | -0.08    | 0.89  | 9.64      | 5.79      | 0.86         | 0.98           |
|             | Run2_MDS1   | 0.47         | 0.78         | 1.01  | 0.63  | 0.87    | 0.99              | 0.74         | -0.1              | -0.07            | 0.44          | 0.28       | 0.63           | 0.5         | -0.08            | -0.31         | -0.24             | 1.15      | 2.06          | 1.37         | 1.4     | 0.06     | 1.37  | 11.97     | 9.51      | 0.13         | 1.69           |
|             | Run2_MDS21  | 0.21         | -0.12        | -0.1  | -0.14 | 0.09    | 0.12              | 1.97         | 0.75              | 0.96             | 0.21          | 0.96       | 0.14           | 0.37        | -0.23            | -0.36         | -0.19             | 2.26      | 2.93          | 1.73         | 0.54    | -0.14    | 14.4  | 6.83      | 78.82     | 0.13         | 0.73           |
|             | Run2_MDS26* | 0.98         | 0.97         | 0.87  | 0.85  | 1.7     | 0.83              | 1.64         | 1.15              | 0.99             | 2             | 1.83       | 1.79           | 1.84        | -0.08            | -0.37         | -0.36             | 1.02      | 6.46          | 0.68         | 1.48    | -0.05    | 1.17  | 28.34     | 3.99      | 0.28         | 3.17           |
|             | Run2_MDS27  | -0.13        | -0.12        | -0.11 | -0.16 | 0.18    | 0.13              | 1.23         | 0.35              | 0                | 2.63          | 2.1        | 0.44           | -0.19       | 0.12             | -0.39         | -0.36             | 0.05      | 2.21          | 0.83         | -0.06   | -0.12    | -0.23 | 10.63     | 3.82      | -0.14        | 0.06           |
|             | Run2_MDS2   | -0.18        | -0.33        | -0.29 | -0.35 | -0.28   | -0.26             | -0.18        | -0.2              | 0                | 0.39          | -0.16      | -0.25          | -0.2        | 0.02             | -0.05         | 0.79              | -0.05     | 4.62          | -0.1         | 0.33    | -0.02    | 1.2   | 0.52      | 5.32      | -0.01        | 0.36           |
|             | Run2_MDS3   | 0.22         | -0.05        | -0.06 | -0.06 | 0.06    | 0.22              | 1.07         | 0.82              | 1.06             | -0.08         | 0.5        | 0.43           | 0.53        | -0.09            | -0.32         | -0.3              | 3.66      | 3.87          | 1.17         | 1.32    | 0.28     | 4.16  | 10.93     | 64.64     | 0.95         | 1.5            |
| Lower Risk  | Run1_MDS23  | 0.55         | 0.68         | 0.72  | 0.63  | 0.9     | 1.07              | 1.92         | 0.6               | 0.04             | 0.79          | 1.06       | 0.75           | 0.48        | -0.34            | -0.34         | 0.76              | 0.73      | 1.72          | 1.95         | 0.22    | -0.05    | 0.3   | 1.67      | 17.63     | -0.14        | 0.46           |
|             | Run1_MDS25  | -0.24        | 1.09         | 0.66  | 0.21  | 0.73    | -0.1              | 0.66         | 0.34              | 0.1              | 0.52          | 0.66       | -0.24          | -0.31       | -0.29            | -0.29         | 0.8               | 0.63      | 2.19          | 0.99         | -0.02   | 0.2      | 0.67  | 16.31     | 8.16      | -0.13        | 0.21           |
|             | Run1_MDS5   | 0.07         | 0.59         | -0.54 | 0.08  | -0.05   | 0.09              | 0.07         | 0.19              | 0.69             | 2.62          | 0.52       | -0.03          | -0.08       | 0.39             | -0.24         | 3.06              | 0.49      | 2.79          | 1.09         | 0.6     | -0.07    | 4.29  | 8.47      | 4.88      | 0.24         | 0.72           |
|             | Run1_MDS6   | -0.03        | -0.14        | -0.26 | -0.23 | 0.24    | 0.1               | 0.52         | 0.34              | 0.1              | 0.41          | 1.12       | 0.74           | -0.17       | -0.12            | -0.42         | 0.46              | 0.4       | 1.27          | 1.03         | -0.03   | -0.07    | 1.52  | 3.54      | 5.59      | -0.09        | 0.04           |
|             | Run1_MDS8   | -0.21        | 0.49         | -0.42 | 0.6   | 0.61    | 0.11              | -0.18        | -0.1              | 0.01             | 0.1           | 0.59       | -0.21          | -0.33       | -0.26            | -0.32         | 0.27              | 0.47      | 1.66          | 0.43         | 0.08    | -0.06    | 7.53  | 5.78      | 10.82     | 0.1          | 0.07           |
|             | Run1_MDS9   | -0.02        | -0.11        | 0.03  | -0.21 | -0.05   | -0.12             | 0.26         | 0.54              | 0.98             | 0.53          | 1.08       | 0              | -0.24       | -0.3             | -0.34         | 5.95              | 0.49      | 2.12          | 1.18         | 0.26    | -0.02    | 0.45  | 3.63      | 16.17     | -0.09        | 0.54           |
|             | Run2_MDS12  | 1.45         | 0.87         | 1.38  | 0.64  | 0.77    | 3.26              | 6.77         | 3.54              | 2.39             | 1.7           | 2.23       | 1.77           | 1.11        | -0.28            | -0.39         | -0.08             | 2.72      | 2.06          | 1.32         | 0.33    | -0.01    | 1.5   | 21.61     | 47.36     | 0            | 0.54           |
|             | Run2_MDS14  | -0.03        | 0.09         | -0.2  | 1.08  | 0.92    | -0.06             | -0.14        | 0.09              | -0.08            | 1.2           | 1.19       | 0.74           | -0.1        | -0.19            | -0.39         | -0.03             | 2.06      | 3.54          | 0.65         | 0.25    | 0.35     | 0.68  | 11.85     | 17.8      | 0.14         | 0.29           |
|             | Run2_MDS19  | 0.38         | 0.7          | 1.5   | 0.55  | 0.79    | 1.15              | 1.34         | 0.83              | 0.34             | 1.89          | 1.85       | 0.76           | -0.04       | -0.21            | -0.37         | -0.31             | 0.51      | 2.39          | 0.83         | 0.26    | -0.08    | 0.54  | 8.44      | 22.19     | -0.1         | 0.41           |
|             | Run2_MDS20  | -0.03        | 0.58         | 0     | 0.26  | 0.8     | -0.16             | -0.18        | -0.13             | 0.11             | 2.23          | 1.99       | 0.64           | -0.17       | 0.07             | -0.26         | 0.01              | 0.58      | 2.06          | 0.99         | 0.22    | -0.18    | -0.14 | 18.51     | 6.95      | -0.04        | 0.25           |
| Run2_MDS28* | 1.3         | 0.77         | 1.7          | 0.65  | 0.88  | 3.52    | 5.38              | 1.21         | 0.34              | 1.83             | 2.31          | 1.86       | 1.04           | 0.08        | -0.34            | 0.49          | 1.27              | 2.63      | 1.36          | 0.41         | 0.25    | 2.75     | 23.99 | 24.11     | 0.01      | 0.83         |                |
| Run2_MDS5   | -0.02       | 0.1          | -0.66        | -0.26 | 0.28  | 0.16    | -0.1              | 0.13         | 0.26              | 3.41             | 0.07          | -0.04      | -0.06          | 0.78        | -0.34            | 1.49          | 0.33              | 2.89      | 0.56          | 0.41         | -0.12   | 3.08     | 8.6   | 6.01      | 0.1       | 0.62         |                |
| ICUS        | Run1_ICUS18 | -0.19        | 0.42         | 0.56  | 0.01  | 0.88    | -0.19             | -0.1         | -0.04             | -0.06            | 1.34          | 1.75       | 0.35           | -0.32       | -0.33            | -0.39         | -0.23             | 0.53      | 2.42          | 2.19         | 0.84    | 0        | 0.23  | 4.26      | 21.97     | 0.17         | 0.98           |
|             | Run1_ICUS22 | -0.19        | 0.47         | 1.15  | 0.34  | 0.68    | 0.05              | 0.3          | 0.45              | 0.24             | 0.89          | 1.26       | 0.19           | -0.36       | -0.3             | -0.32         | -0.1              | 1.42      | 2.46          | 1.57         | 0.4     | 0.56     | -0.13 | 29.86     | 12.56     | -0.07        | 0.59           |
|             | Run1_ICUS24 | 0.36         | 0.52         | 0.33  | 0.57  | 1.04    | 1.44              | 2.96         | 0.97              | -0.01            | 0.98          | 1.61       | 0.86           | -0.08       | -0.33            | -0.43         | 3.82              | 2.26      | 2.51          | 1.39         | 0.18    | 0.22     | 1.35  | 29.64     | 14.05     | 0.12         | 0.22           |
| Normal      | Run1_NI-1   | 0.32         | 0.58         | -0.43 | -0.07 | 1.43    | 1.73              | 1.56         | 1.19              | 0.16             | 1.2           | 1.81       | 0.72           | -0.18       | -0.32            | -0.38         | 0.57              | 3.98      | 4.02          | 1.8          | 1.65    | 0.33     | 1.41  | 169.21    | 12.59     | 2.06         | 1.44           |
|             | Run1_NI-3   | 0.47         | 0.7          | 0.65  | 0.64  | 0.92    | 2.15              | 3.19         | 1.72              | 0.47             | 1.24          | 1.33       | 0.61           | -0.07       | 0.08             | -0.33         | 0.38              | 1.43      | 2.17          | 1.11         | 0.23    | -0.06    | 0.79  | 13.42     | 8.63      | 0.13         | 0.28           |
|             | Run1_NI-4   | 0.33         | 0.7          | 0.41  | 0.78  | 0.93    | 1.92              | 3.94         | 1.41              | 0.52             | 1.19          | 1.2        | 0.39           | -0.13       | 0.32             | -0.36         | 0.22              | 1.59      | 1.75          | 1.41         | 0.35    | 0.44     | 1.04  | 20.29     | 13.32     | 0.44         | 0.29           |
|             | Run1_NI-6   | 0.33         | 0.75         | 0.93  | 0.65  | 0.87    | 2.11              | 3.34         | 0.89              | 0.1              | 1.18          | 1.15       | 0.56           | -0.05       | -0.19            | -0.41         | 0.08              | 2.08      | 2.3           | 1.25         | 0.5     | 0.1      | 0.61  | 14.62     | 8.59      | 0.13         | 0.6            |
|             | Run2_NI-3   | 0.5          | 0.6          | 0.65  | 0.47  | 0.75    | 1.96              | 3.04         | 1.12              | 0.43             | 1.63          | 1.16       | 0.42           | -0.03       | -0.02            | -0.32         | 0.07              | 1.46      | 2.33          | 0.91         | 0.26    | -0.1     | 0.52  | 13.44     | 11.46     | 0.2          | 0.3            |
|             | Run2_NI-6   | 0.43         | 0.81         | 1.56  | 0.56  | 0.75    | 1.87              | 3.25         | 0.93              | 0.61             | 1.77          | 1.17       | 0.35           | -0.06       | 0.32             | -0.28         | 0.05              | 1.64      | 2.01          | 0.93         | 0.36    | 0.33     | 0.89  | 23.5      | 19.59     | 0.54         | 0.23           |
| Run2_NI-5   | 0.38        | 0.47         | 0.74         | 0.46  | 1.23  | 2.47    | 3.11              | 0.77         | 0.53              | 1.94             | 1.28          | 0.37       | -0.06          | 0.33        | -0.33            | -0.06         | 2.05              | 2.21      | 1.06          | 0.36         | -0.03   | 0.88     | 10.62 | 14.85     | 0.36      | 0.35         |                |
| Run2_NI-6   | 0.4         | 0.54         | 0.91         | 0.47  | 0.82  | 1.82    | 2.57              | 0.55         | 0.23              | 1.71             | 1.21          | 0.51       | -0.04          | -0.12       | -0.36            | -0.15         | 1.95              | 2.52      | 1.11          | 0.47         | 0       | 0.45     | 10.95 | 14.72     | 0.1       | 0.61         |                |

Supplemental Table 3: Median expression of each surface marker on each cell population.

|             |             | CD10 Median |              |       |       |         |                   |              |                   |                  |               |            |                |             |                  |               |                   |           |               |              |         |          |       |           |           |              |                |
|-------------|-------------|-------------|--------------|-------|-------|---------|-------------------|--------------|-------------------|------------------|---------------|------------|----------------|-------------|------------------|---------------|-------------------|-----------|---------------|--------------|---------|----------|-------|-----------|-----------|--------------|----------------|
|             |             | Ungated     | CD34+CD38low | HSCs  | MPP   | CMP/GMP | Myelo/Mono-Blasts | ProMonocytes | CD14neg Monocytes | Mature Monocytes | ProMyelocytes | Myelocytes | MetaMyelocytes | MatureGrans | ProErythroblasts | Erythroblasts | LateErythroblasts | PreBCells | Mature Bcells | Plasma Cells | T cells | NK cells | pDCs  | Basophils | Platelets | CD8+ T cells | CD8neg T cells |
| AML/RAEB-T  | Run1_MDS17  | -0.07       | -0.06        | 0     | -0.09 | -0.15   | -0.16             | -0.03        | 0.34              | 1.03             | -0.21         | -0.15      | 0.47           | 1.18        | -0.37            | -0.38         | -0.32             | 0.33      | 0.42          | -0.4         | -0.07   | -0.3     | -0.32 | 0.72      | -0.41     | -0.07        | -0.06          |
|             | Run2_MDS15* | 0.39        | -0.09        | -0.13 | -0.16 | -0.2    | -0.18             | -0.14        | 1.59              | 1.08             | -0.16         | -0.09      | 0.59           | 3.34        | -0.27            | 0.04          | 0.6               | 3.57      | 0.62          | -0.1         | -0.05   | -0.09    | 0.2   | -0.11     | -0.24     | -0.06        | -0.04          |
|             | Run2_MDS4   | 0.06        | -0.29        | -0.33 | -0.32 | 0.77    | -0.24             | 0.03         | 0.37              | 0.8              | -0.33         | -0.28      | 0.36           | 2.22        | -0.41            | -0.35         | -0.3              | 0.71      | 0.21          | -0.43        | 0       | 0.09     | 0.3   | -0.26     | -0.15     | 0            | 0              |
| Higher Risk | Run1_MDS21  | -0.24       | -0.22        | -0.27 | -0.25 | -0.29   | -0.28             | 0.03         | 0.57              | 0.59             | -0.37         | -0.29      | -0.17          | 0.22        | -0.33            | -0.27         | -0.2              | 0.28      | 0.58          | -0.28        | -0.13   | -0.04    | -0.42 | -0.29     | -0.42     | -0.09        | -0.15          |
|             | Run1_MDS3   | -0.23       | -0.23        | -0.27 | -0.25 | -0.26   | -0.27             | 0.05         | 0.28              | 1.11             | -0.4          | -0.34      | -0.14          | 0.4         | -0.31            | -0.29         | -0.15             | 0.27      | 0.69          | -0.51        | 0.02    | 0.15     | 0.18  | -0.28     | -0.41     | -0.01        | 0.03           |
|             | Run2_MDS13  | -0.23       | -0.22        | -0.23 | -0.24 | -0.26   | -0.27             | 0.04         | 0.02              | 0.71             | -0.35         | -0.29      | -0.15          | -0.02       | -0.3             | -0.33         | -0.32             | 0.11      | 0.3           | -0.28        | -0.07   | -0.03    | -0.16 | -0.33     | -0.44     | -0.07        | -0.07          |
|             | Run2_MDS16  | 0.01        | -0.2         | -0.17 | -0.26 | -0.12   | 0.01              | 0.33         | 0.04              | 0.41             | -0.39         | -0.31      | -0.18          | 0.68        | -0.28            | -0.35         | -0.16             | 0.14      | 0.37          | -0.26        | -0.01   | -0.3     | 0.09  | -0.19     | -0.42     | -0.04        | 0              |
|             | Run2_MDS1   | -0.07       | -0.07        | -0.04 | -0.12 | -0.13   | -0.21             | -0.12        | -0.08             | 0.3              | -0.35         | -0.28      | 0.49           | 1.26        | -0.33            | -0.27         | -0.27             | 0.21      | 0.3           | -0.34        | -0.01   | -0.08    | -0.02 | -0.37     | -0.29     | 0            | -0.01          |
|             | Run2_MDS21  | -0.25       | -0.25        | -0.19 | -0.26 | -0.27   | -0.28             | -0.2         | -0.03             | 0.35             | -0.35         | -0.32      | -0.2           | -0.06       | -0.31            | -0.33         | -0.35             | 0.11      | 0.6           | -0.27        | -0.1    | -0.16    | -0.05 | -0.18     | -0.39     | -0.07        | -0.12          |
|             | Run2_MDS27  | -0.25       | -0.2         | -0.15 | -0.21 | -0.35   | -0.35             | -0.23        | 0.08              | -0.13            | -0.39         | -0.37      | -0.16          | 0.48        | -0.35            | -0.32         | -0.35             | 0.02      | 0.22          | -0.3         | -0.09   | -0.33    | -0.09 | -0.35     | -0.37     | -0.07        | -0.11          |
|             | Run2_MDS26* | -0.2        | -0.23        | -0.19 | -0.26 | -0.2    | -0.21             | -0.05        | -0.09             | 0.23             | -0.38         | -0.35      | -0.3           | 0.02        | -0.34            | -0.38         | -0.34             | 0.23      | 0.38          | -0.4         | 0.03    | -0.27    | 0.4   | -0.18     | 0.53      | -0.01        | 0.07           |
|             | Run2_MDS2   | -0.13       | -0.19        | -0.02 | -0.23 | -0.19   | -0.22             | -0.09        | -0.09             | 0.35             | -0.37         | -0.25      | -0.14          | -0.03       | -0.15            | -0.13         | -0.14             | 0         | 0.96          | -0.03        | -0.03   | -0.29    | -0.28 | -0.33     | -0.41     | -0.02        | -0.03          |
| Run2_MDS3   | -0.22       | -0.23       | -0.26        | -0.22 | -0.27 | -0.27   | -0.26             | 0.1          | 0.48              | -0.33            | -0.27         | -0.15      | 0.17           | -0.24       | -0.31            | -0.36         | 0.21              | 0.56      | -0.34         | 0.07         | -0.03   | -0.37    | -0.34 | -0.37     | 0.07      | 0.07         |                |
| Lower Risk  | Run1_MDS23  | -0.05       | -0.32        | -0.3  | -0.29 | -0.27   | -0.28             | -0.04        | 0.01              | 0.38             | -0.38         | -0.37      | -0.14          | 1.79        | -0.32            | -0.24         | -0.08             | 0.31      | 0.41          | -0.49        | -0.01   | -0.06    | -0.15 | -0.32     | -0.34     | 0.01         | -0.02          |
|             | Run1_MDS25  | 3.57        | 1.18         | 0.95  | 0.06  | -0.59   | -0.15             | 0.18         | 0.22              | 0.53             | -0.34         | -0.2       | 2.7            | 4.95        | -0.25            | -0.09         | 2.02              | 0.15      | 0.42          | -0.57        | -0.1    | -0.3     | -0.05 | -0.2      | 0.5       | -0.13        | -0.05          |
|             | Run1_MDS5   | 0.18        | 0.38         | 0.51  | 0.19  | -0.47   | -0.28             | -0.03        | -0.06             | 0.97             | -0.17         | 0.04       | 0.02           | 0.54        | -0.2             | -0.25         | -0.14             | 0.27      | 0.32          | -0.52        | -0.1    | 0.03     | 0.04  | -0.35     | -0.36     | -0.14        | -0.08          |
|             | Run1_MDS6   | 1.15        | -0.27        | -0.27 | -0.37 | -0.35   | -0.22             | 0.08         | 0.18              | 0.54             | -0.33         | -0.31      | -0.11          | 3           | -0.33            | -0.39         | 0.17              | 0.5       | 0.43          | -0.56        | -0.05   | -0.19    | -0.04 | -0.22     | -0.45     | -0.06        | -0.04          |
|             | Run1_MDS8   | 1.43        | 0.04         | -0.58 | 0.05  | -0.18   | -0.09             | 0.29         | -0.04             | 0.32             | -0.36         | -0.26      | 1.37           | 2.98        | -0.29            | -0.31         | -0.15             | 0.08      | 0.42          | -0.47        | -0.26   | -0.29    | 0.08  | -0.28     | -0.47     | -0.22        | -0.27          |
|             | Run1_MDS9   | 0.17        | -0.23        | -0.26 | -0.26 | -0.2    | -0.15             | 0.39         | 0.21              | 0.49             | -0.35         | -0.33      | 0.1            | 1.25        | -0.33            | -0.34         | -0.14             | 0.28      | 0.23          | -0.41        | -0.12   | -0.27    | 0.18  | -0.2      | -0.43     | -0.08        | -0.15          |
|             | Run2_MDS12  | -0.12       | -0.28        | -0.04 | -0.32 | -0.22   | -0.17             | 0.01         | 0.08              | 0.42             | -0.38         | -0.38      | -0.17          | 1.07        | -0.35            | -0.34         | -0.28             | 0.09      | 0.05          | -0.39        | -0.06   | -0.12    | -0.17 | -0.3      | -0.37     | -0.02        | -0.09          |
|             | Run2_MDS14  | 0.68        | 0.17         | 0.07  | 0.29  | 0.14    | 0.17              | 0.29         | 0                 | 0.24             | 0.4           | -0.34      | 2.09           | 1.31        | -0.31            | -0.35         | 0.69              | 1.39      | 0.55          | -0.33        | 0.1     | -0.24    | 0.05  | -0.24     | -0.37     | -0.01        | 0.17           |
|             | Run2_MDS19  | -0.12       | -0.22        | -0.11 | -0.22 | -0.19   | -0.21             | -0.06        | -0.06             | 0.31             | -0.39         | -0.36      | -0.28          | 0.47        | -0.36            | -0.37         | -0.34             | 0.36      | 0.58          | -0.54        | 0.04    | -0.25    | -0.28 | -0.3      | -0.39     | 0            | 0.05           |
|             | Run2_MDS20  | 0.37        | -0.28        | -0.14 | 0.87  | -0.16   | -0.13             | 0.08         | -0.04             | 0.33             | -0.37         | -0.32      | -0.22          | 1.12        | -0.28            | -0.26         | 0.31              | 0.28      | 0.44          | -0.39        | -0.08   | -0.26    | 0.18  | -0.17     | -0.41     | -0.11        | -0.08          |
|             | Run2_MDS28* | -0.16       | -0.28        | -0.18 | -0.26 | -0.21   | -0.3              | -0.14        | -0.1              | 0.15             | -0.38         | -0.38      | -0.33          | 0.17        | -0.27            | -0.34         | -0.21             | 0.22      | 0.26          | -0.43        | -0.01   | -0.11    | -0.06 | -0.1      | -0.23     | -0.02        | 0.02           |
| Run2_MDS5   | 0.08        | 0.13        | -0.37        | -0.28 | -0.37 | -0.33   | -0.14             | -0.1         | 0.37              | -0.34            | -0.11         | -0.06      | 0.37           | -0.36       | -0.27            | -0.11         | 0.28              | 0.37      | -0.46         | -0.07        | -0.05   | -0.25    | -0.19 | -0.36     | -0.07     | -0.07        |                |
| ICUS        | Run1_ICUS18 | 1.35        | -0.03        | -0.24 | -0.06 | -0.26   | 0.11              | 0.32         | 0.01              | 0.46             | -0.34         | -0.3       | -0.05          | 2.32        | -0.28            | -0.25         | 1.7               | 0.38      | 0.56          | -0.32        | -0.02   | -0.27    | 0.08  | -0.18     | -0.46     | -0.02        | -0.02          |
|             | Run1_ICUS22 | 0.4         | -0.31        | -0.4  | -0.31 | -0.14   | -0.13             | 0.23         | -0.05             | 0.25             | -0.41         | -0.39      | -0.35          | 1.03        | -0.36            | -0.29         | 0.31              | 1.34      | 0.45          | -0.52        | 0.06    | -0.38    | 0.32  | -0.26     | -0.45     | 0.04         | 0.06           |
|             | Run1_ICUS24 | 0.15        | -0.19        | -0.08 | -0.26 | 0.24    | -0.02             | 0.12         | 0.07              | 0.44             | -0.36         | -0.35      | -0.24          | 1.05        | -0.35            | -0.37         | -0.25             | 2.04      | 0.43          | -0.34        | -0.01   | -0.3     | -0.23 | -0.32     | -0.47     | -0.06        | 0.06           |
| Normal      | Run1_NI-1   | 0.37        | -0.05        | -0.26 | -0.05 | 0.65    | 0.2               | 0.34         | 0.03              | 0.43             | -0.37         | -0.38      | -0.33          | 1.64        | -0.35            | -0.29         | 0.18              | 1.8       | 0.73          | -0.48        | -0.02   | -0.32    | 0.33  | -0.23     | -0.42     | -0.02        | -0.02          |
|             | Run1_NI-3   | 0.57        | -0.17        | -0.04 | -0.16 | -0.16   | -0.11             | -0.03        | -0.02             | 0.35             | -0.24         | -0.24      | 0.03           | 3.83        | -0.23            | -0.27         | 1.17              | 0.89      | 0.39          | -0.45        | -0.06   | -0.25    | -0.05 | -0.2      | -0.48     | -0.09        | -0.05          |
|             | Run1_NI-4   | 0.72        | -0.09        | -0.19 | -0.39 | -0.24   | -0.15             | 0.11         | 0.04              | 0.51             | -0.19         | -0.19      | 0.31           | 3.88        | -0.21            | -0.26         | 1.15              | 0.84      | 0.43          | -0.45        | -0.04   | -0.27    | 0.24  | -0.19     | -0.46     | -0.03        | -0.04          |
|             | Run1_NI-6   | 0.44        | -0.14        | -0.02 | -0.22 | -0.03   | -0.09             | 0.15         | 0.06              | 0.51             | -0.18         | -0.13      | -0.07          | 2.35        | -0.3             | -0.33         | 0.33              | 2.22      | 0.4           | -0.41        | 0.01    | -0.28    | 0.11  | -0.33     | -0.43     | -0.01        | 0.01           |
|             | Run2_NI-3   | 0.25        | -0.27        | -0.12 | -0.3  | -0.09   | -0.13             | -0.01        | 0.1               | 0.44             | -0.32         | -0.21      | 0.12           | 2.53        | -0.29            | -0.27         | 0.81              | 0.84      | 0.37          | -0.42        | -0.01   | -0.24    | -0.1  | -0.14     | -0.42     | -0.02        | -0.01          |
|             | Run2_NI-4   | 0.31        | -0.29        | -0.36 | -0.28 | -0.19   | -0.16             | 0.02         | 0.18              | 0.6              | -0.33         | -0.22      | 0.14           | 2.56        | -0.28            | -0.26         | 0.6               | 1.05      | 0.45          | -0.35        | 0.02    | -0.25    | 0.3   | -0.19     | -0.39     | -0.01        | 0.06           |
|             | Run2_NI-5   | 0           | -0.18        | -0.33 | -0.41 | 0.21    | -0.09             | 0.06         | 0.1               | 0.52             | -0.35         | -0.28      | -0.15          | 1.42        | -0.27            | -0.33         | 0.16              | 2.15      | 0.63          | -0.35        | -0.07   | -0.3     | 0.06  | -0.1      | -0.41     | -0.08        | -0.06          |
| Run2_NI-6   | -0.08       | -0.09       | 0.02         | -0.13 | -0.03 | -0.14   | 0.02              | 0.09         | 0.46              | -0.34            | -0.32         | -0.24      | 0.82           | -0.34       | -0.36            | -0.19         | 2.12              | 0.37      | -0.35         | 0.1          | -0.25   | -0.01    | -0.29 | -0.44     | 0.06      | 0.12         |                |

Supplemental Table 3: Median expression of each surface marker on each cell population.

|             |             | CD19 Median |              |       |       |         |                   |              |                   |                  |               |            |                |             |                  |               |                   |           |               |              |         |          |       |           |           |              |                |
|-------------|-------------|-------------|--------------|-------|-------|---------|-------------------|--------------|-------------------|------------------|---------------|------------|----------------|-------------|------------------|---------------|-------------------|-----------|---------------|--------------|---------|----------|-------|-----------|-----------|--------------|----------------|
|             |             | Ungated     | CD34+CD38low | HSCs  | MPP   | CMP/GMP | Myelo/Mono-Blasts | ProMonocytes | CD14neg Monocytes | Mature Monocytes | ProMyelocytes | Myelocytes | MetaMyelocytes | MatureGrans | ProErythroblasts | Erythroblasts | LateErythroblasts | PreBCells | Mature Bcells | Plasma Cells | T cells | NK cells | pDCs  | Basophils | Platelets | CD8+ T cells | CD8neg T cells |
| AML/RAEB-T  | Run1_MDS17  | -0.46       | -0.46        | -0.46 | -0.47 | -0.47   | -0.48             | -0.53        | -0.46             | -0.46            | -0.49         | -0.48      | -0.46          | -0.42       | -0.5             | -0.5          | -0.48             | 2.7       | 13.83         | -0.33        | -0.46   | -0.48    | -0.17 | -0.56     | -0.44     | -0.45        | -0.47          |
|             | Run2_MDS15* | -0.38       | -0.41        | -0.41 | -0.42 | -0.43   | -0.42             | -0.37        | -0.36             | -0.43            | -0.43         | -0.38      | -0.3           | -0.38       | -0.33            | -0.32         | 2.79              | 26.69     | -0.12         | -0.42        | -0.39   | -0.41    | -0.41 | -0.49     | -0.42     | -0.42        |                |
|             | Run2_MDS4   | -0.39       | -0.43        | -0.45 | -0.44 | -0.07   | -0.42             | -0.4         | -0.4              | -0.36            | -0.43         | -0.41      | -0.42          | -0.35       | -0.45            | -0.43         | -0.43             | 3.55      | 5.41          | -0.28        | -0.41   | -0.4     | -0.32 | -0.45     | -0.22     | -0.41        | -0.42          |
|             | Run1_MDS21  | -0.46       | -0.47        | -0.42 | -0.49 | -0.47   | -0.47             | -0.45        | -0.44             | -0.45            | -0.49         | -0.51      | -0.49          | -0.47       | -0.51            | -0.49         | -0.45             | 10.55     | 16.46         | -0.66        | -0.47   | -0.44    | -0.54 | -0.51     | -0.48     | -0.47        | -0.47          |
| Higher Risk | Run1_MDS3   | -0.46       | -0.46        | -0.48 | -0.5  | -0.49   | -0.48             | -0.46        | -0.53             | -0.34            | -0.5          | -0.48      | -0.5           | -0.46       | -0.5             | -0.47         | -0.51             | 9.42      | 16.11         | -0.1         | -0.47   | -0.46    | -0.35 | -0.37     | -0.47     | -0.45        | -0.48          |
|             | Run2_MDS13  | -0.41       | -0.42        | -0.43 | -0.42 | -0.43   | -0.43             | -0.36        | -0.4              | -0.33            | -0.44         | -0.43      | -0.42          | -0.41       | -0.36            | -0.44         | -0.37             | 8.09      | 12.74         | -0.09        | -0.42   | -0.41    | -0.06 | -0.4      | -0.41     | -0.41        | -0.43          |
|             | Run2_MDS16  | -0.4        | -0.41        | -0.43 | -0.42 | -0.4    | -0.42             | -0.46        | -0.44             | -0.41            | -0.44         | -0.44      | -0.44          | -0.4        | -0.43            | -0.44         | -0.42             | 2.85      | 17.3          | 0.01         | -0.41   | -0.43    | -0.41 | -0.43     | -0.43     | -0.42        | -0.41          |
|             | Run2_MDS1   | -0.41       | -0.42        | -0.35 | -0.47 | -0.4    | -0.42             | -0.45        | -0.43             | -0.43            | -0.43         | -0.47      | -0.41          | -0.36       | -0.45            | -0.42         | -0.41             | 2.84      | 8.94          | -0.3         | -0.41   | -0.43    | -0.43 | -0.36     | -0.51     | -0.4         | -0.41          |
|             | Run2_MDS21  | -0.41       | -0.41        | -0.44 | -0.41 | -0.42   | -0.43             | -0.41        | -0.42             | -0.45            | -0.43         | -0.42      | -0.44          | -0.43       | -0.47            | -0.45         | -0.46             | 10.77     | 17.11         | -0.15        | -0.43   | -0.39    | -0.47 | -0.53     | -0.41     | -0.43        | -0.43          |
|             | Run2_MDS26* | -0.43       | -0.44        | -0.42 | -0.46 | -0.4    | -0.41             | -0.34        | -0.41             | -0.27            | -0.45         | -0.45      | -0.44          | -0.41       | -0.43            | -0.44         | -0.42             | 2.78      | 10.52         | -0.31        | -0.42   | -0.42    | -0.51 | -0.43     | -0.47     | -0.4         | -0.44          |
|             | Run2_MDS27  | -0.42       | -0.42        | -0.42 | -0.42 | -0.45   | -0.4              | -0.42        | -0.38             | -0.4             | -0.45         | -0.44      | -0.43          | -0.43       | -0.44            | -0.43         | -0.46             | 2.97      | 17.63         | -0.22        | -0.41   | -0.43    | -0.39 | -0.47     | -0.43     | -0.41        | -0.41          |
|             | Run2_MDS2   | -0.42       | -0.4         | -0.36 | -0.41 | -0.45   | -0.44             | -0.46        | -0.42             | -0.39            | -0.42         | -0.5       | -0.43          | -0.43       | -0.4             | -0.34         | -0.41             | 2.82      | 6.32          | -0.38        | -0.4    | -0.42    | -0.59 | -0.48     | -0.43     | -0.38        | -0.4           |
| Run2_MDS3   | -0.41       | -0.44       | -0.36        | -0.49 | -0.41 | -0.42   | -0.42             | -0.44        | -0.37             | -0.44            | -0.42         | -0.42      | -0.42          | -0.43       | -0.45            | -0.42         | 11.02             | 17.18     | -0.14         | -0.41        | -0.5    | -0.51    | -0.48 | -0.4      | -0.42     | -0.41        |                |
| Lower Risk  | Run1_MDS23  | -0.46       | -0.55        | -0.72 | -0.47 | -0.48   | -0.48             | -0.48        | -0.46             | -0.49            | -0.5          | -0.48      | -0.42          | -0.5        | -0.49            | -0.46         | 2.78              | 14.03     | -0.32         | -0.48        | -0.48   | -0.52    | -0.44 | -0.45     | -0.45     | -0.48        |                |
|             | Run1_MDS25  | -0.32       | -0.42        | -0.77 | -0.71 | -0.33   | -0.45             | -0.51        | -0.47             | -0.47            | -0.51         | -0.52      | -0.39          | -0.42       | -0.45            | -0.46         | -0.22             | 2.94      | 18.1          | -0.25        | -0.47   | -0.5     | -0.48 | -0.48     | -0.55     | -0.47        | -0.47          |
|             | Run1_MDS5   | -0.45       | -0.32        | -0.12 | -0.48 | -0.52   | -0.53             | -0.43        | -0.46             | -0.44            | -0.51         | -0.51      | -0.47          | -0.46       | -0.37            | -0.5          | 0.4               | 2.74      | 13.39         | -0.12        | -0.49   | -0.45    | -0.42 | -0.45     | -0.44     | -0.5         | -0.48          |
|             | Run1_MDS6   | -0.39       | -0.5         | -0.54 | -0.47 | -0.46   | -0.46             | -0.46        | -0.49             | -0.45            | -0.49         | -0.5       | -0.48          | -0.37       | -0.46            | -0.5          | -0.42             | 3.63      | 12.21         | -0.01        | -0.47   | -0.48    | -0.43 | -0.44     | -0.48     | -0.46        | -0.48          |
|             | Run1_MDS8   | -0.4        | -0.5         | -0.61 | -0.69 | -0.4    | -0.44             | -0.53        | -0.49             | -0.45            | -0.49         | -0.51      | -0.44          | -0.38       | -0.48            | -0.47         | -0.43             | 2.74      | 15.88         | -0.49        | -0.49   | -0.5     | -0.28 | -0.51     | -0.48     | -0.49        | -0.49          |
|             | Run1_MDS9   | -0.45       | -0.49        | -0.49 | -0.49 | -0.46   | -0.47             | -0.48        | -0.46             | -0.48            | -0.5          | -0.5       | -0.49          | -0.44       | -0.5             | -0.49         | -0.44             | 2.65      | 10.44         | -0.57        | -0.48   | -0.46    | -0.55 | -0.47     | -0.47     | -0.48        | -0.49          |
|             | Run2_MDS12  | -0.41       | -0.45        | -0.37 | -0.43 | -0.39   | -0.43             | -0.42        | -0.41             | -0.4             | -0.44         | -0.44      | -0.43          | -0.38       | -0.44            | -0.45         | -0.42             | 2.96      | 11.53         | -0.18        | -0.4    | -0.43    | -0.42 | -0.38     | -0.4      | -0.41        | -0.39          |
|             | Run2_MDS14  | -0.37       | -0.15        | -0.36 | -0.15 | -0.18   | -0.37             | -0.42        | -0.42             | -0.42            | -0.45         | -0.45      | -0.45          | -0.37       | -0.38            | -0.46         | -0.34             | 4.68      | 14.9          | 0.08         | -0.48   | -0.46    | -0.41 | -0.42     | -0.41     | -0.42        | -0.41          |
|             | Run2_MDS19  | -0.42       | -0.39        | -0.37 | -0.39 | -0.45   | -0.44             | -0.42        | -0.41             | -0.39            | -0.44         | -0.45      | -0.44          | -0.41       | -0.38            | -0.46         | -0.43             | 2.73      | 24.34         | -0.31        | -0.41   | -0.43    | -0.46 | -0.45     | -0.43     | -0.42        | -0.4           |
|             | Run2_MDS20  | -0.39       | -0.49        | -0.04 | -0.77 | -0.36   | -0.41             | -0.44        | -0.43             | -0.4             | -0.43         | -0.45      | -0.45          | -0.38       | -0.4             | -0.43         | -0.36             | 2.76      | 26.27         | -0.04        | -0.42   | -0.44    | -0.39 | -0.4      | -0.45     | -0.4         | -0.42          |
| Run2_MDS28* | -0.42       | -0.36       | -0.31        | -0.46 | -0.43 | -0.43   | -0.42             | -0.43        | -0.4              | -0.43            | -0.45         | -0.44      | -0.42          | -0.41       | -0.44            | -0.41         | 2.82              | 13.8      | -0.31         | -0.42        | -0.43   | -0.44    | -0.39 | -0.47     | -0.42     | -0.42        |                |
| Run2_MDS5   | -0.4        | -0.33       | 0.45         | -0.64 | -0.23 | -0.41   | -0.47             | -0.41        | -0.4              | -0.44            | -0.44         | -0.43      | -0.4           | -0.36       | -0.42            | -0.37         | 2.77              | 14.41     | -0.13         | -0.4         | -0.4    | -0.52    | -0.35 | -0.4      | -0.4      | -0.4         |                |
| ICUS        | Run1_ICUS18 | -0.41       | -0.43        | -0.35 | -0.31 | -0.62   | -0.45             | -0.48        | -0.49             | -0.47            | -0.48         | -0.48      | -0.48          | -0.41       | -0.47            | -0.48         | -0.39             | 2.72      | 12.53         | -0.17        | -0.47   | -0.48    | -0.42 | -0.51     | -0.45     | -0.46        | -0.47          |
|             | Run1_ICUS22 | -0.45       | -0.5         | -0.54 | -0.54 | -0.45   | -0.48             | -0.46        | -0.48             | -0.47            | -0.5          | -0.5       | -0.51          | -0.46       | -0.51            | -0.46         | -0.44             | 3.72      | 11.8          | -0.31        | -0.48   | -0.51    | -0.47 | -0.5      | -0.44     | -0.48        | -0.48          |
|             | Run1_ICUS24 | -0.43       | -0.42        | -0.36 | -0.48 | -0.41   | -0.43             | -0.46        | -0.47             | -0.46            | -0.48         | -0.5       | -0.49          | -0.45       | -0.5             | -0.45         | -0.45             | 6.01      | 13.67         | -0.26        | -0.47   | -0.5     | -0.47 | -0.46     | -0.49     | -0.46        | -0.48          |
| Normal      | Run1_NI-1   | -0.42       | -0.54        | -0.77 | -0.56 | -0.28   | -0.38             | -0.46        | -0.5              | -0.45            | -0.49         | -0.5       | -0.5           | -0.42       | -0.38            | -0.48         | -0.42             | 5.5       | 12.2          | -0.08        | -0.48   | -0.5     | -0.46 | -0.47     | -0.45     | -0.48        | -0.48          |
|             | Run1_NI-3   | -0.39       | -0.48        | -0.58 | -0.49 | -0.39   | -0.45             | -0.47        | -0.47             | -0.46            | -0.48         | -0.47      | -0.45          | -0.35       | -0.45            | -0.48         | -0.36             | 3.76      | 14.21         | -0.11        | -0.47   | -0.48    | -0.46 | -0.5      | -0.48     | -0.46        | -0.46          |
|             | Run1_NI-4   | -0.39       | -0.47        | -0.74 | -0.47 | -0.48   | -0.44             | -0.45        | -0.46             | -0.44            | -0.47         | -0.47      | -0.45          | -0.33       | -0.41            | -0.49         | -0.38             | 4.5       | 12.55         | -0.47        | -0.49   | -0.46    | -0.47 | -0.45     | -0.48     | -0.47        | -0.47          |
|             | Run1_NI-6   | -0.42       | -0.44        | -0.41 | -0.44 | -0.41   | -0.44             | -0.46        | -0.46             | -0.44            | -0.47         | -0.47      | -0.48          | -0.39       | -0.51            | -0.49         | -0.43             | 6.15      | 10.49         | -0.07        | -0.47   | -0.48    | -0.41 | -0.46     | -0.48     | -0.45        | -0.48          |
|             | Run2_NI-3   | -0.36       | -0.44        | -0.5  | -0.39 | -0.35   | -0.41             | -0.41        | -0.4              | -0.41            | -0.42         | -0.42      | -0.39          | -0.32       | -0.42            | -0.44         | -0.36             | 4.22      | 14.78         | -0.18        | -0.42   | -0.43    | -0.38 | -0.43     | -0.44     | -0.42        | -0.42          |
|             | Run2_NI-4   | -0.36       | -0.36        | -0.26 | -0.48 | -0.4    | -0.39             | -0.41        | -0.42             | -0.38            | -0.42         | -0.41      | -0.39          | -0.31       | -0.42            | -0.44         | -0.37             | 4.57      | 13.53         | -0.26        | -0.41   | -0.43    | -0.43 | -0.42     | -0.41     | -0.4         | -0.4           |
|             | Run2_NI-5   | -0.38       | -0.42        | -0.47 | -0.37 | -0.33   | -0.38             | -0.39        | -0.41             | -0.38            | -0.43         | -0.42      | -0.42          | -0.35       | -0.41            | -0.43         | -0.4              | 5.53      | 12.67         | -0.19        | -0.42   | -0.42    | -0.39 | -0.42     | -0.43     | -0.42        | -0.42          |
|             | Run2_NI-6   | -0.39       | -0.4         | -0.41 | -0.38 | -0.4    | -0.41             | -0.41        | -0.41             | -0.37            | -0.43         | -0.44      | -0.43          | -0.38       | -0.43            | -0.44         | -0.42             | 6.27      | 10.97         | -0.06        | -0.41   | -0.44    | -0.4  | -0.44     | -0.4      | -0.44        | -0.41          |



Supplemental Table 3: Median expression of each surface marker on each cell population.

|             |             | CD20 Median |              |       |       |         |                   |              |                   |                  |               |            |                |             |                   |               |                   |           |               |              |         |          |       |           |           |              |                |
|-------------|-------------|-------------|--------------|-------|-------|---------|-------------------|--------------|-------------------|------------------|---------------|------------|----------------|-------------|-------------------|---------------|-------------------|-----------|---------------|--------------|---------|----------|-------|-----------|-----------|--------------|----------------|
|             |             | Ungated     | CD34+CD38low | HSCs  | MPP   | CMP/GMP | Myelo/Mono-Blasts | ProMonocytes | CD14neg Monocytes | Mature Monocytes | ProMyelocytes | Myelocytes | MetaMyelocytes | MatureGrans | ProTryptroblast s | Erythroblasts | LateErythroblasts | PreBcells | Mature Bcells | Plasma Cells | T cells | NK cells | pDCs  | Basophils | Platelets | CD8+ T cells | CD8neg T cells |
| AML/RAEB-T  | Run1_MDS17  | -0.41       | -0.45        | -0.44 | -0.45 | -0.43   | -0.43             | -0.33        | -0.38             | -0.38            | -0.21         | -0.25      | -0.34          | -0.33       | -0.3              | -0.14         | -0.25             | -0.29     | 50.07         | -0.43        | -0.4    | -0.46    | -0.38 | -0.25     | -0.28     | -0.37        | -0.45          |
|             | Run2_MDS15* | -0.33       | -0.37        | -0.39 | -0.42 | -0.4    | -0.28             | -0.22        | -0.36             | -0.38            | -0.21         | -0.25      | -0.34          | -0.33       | -0.3              | -0.14         | -0.25             | -0.29     | 137.6         | -0.23        | -0.34   | -0.36    | -0.39 | -0.36     | -0.35     | -0.28        | -0.39          |
|             | Run2_MDS4   | -0.34       | -0.35        | -0.34 | -0.34 | -0.52   | -0.33             | -0.39        | -0.41             | -0.4             | -0.34         | -0.36      | -0.4           | -0.38       | -0.18             | -0.15         | -0.16             | 0.42      | 38.63         | -0.43        | -0.3    | -0.31    | 0.08  | -0.42     | -0.15     | -0.26        | -0.34          |
|             | Run1_MDS21  | -0.41       | -0.45        | -0.39 | -0.46 | -0.46   | -0.44             | -0.3         | -0.45             | -0.41            | -0.45         | -0.42      | -0.45          | -0.43       | -0.35             | -0.33         | -0.18             | 1.78      | 32.69         | -0.62        | -0.47   | -0.45    | -0.56 | -0.57     | -0.24     | -0.45        | -0.48          |
| Higher Risk | Run1_MDS3   | -0.4        | -0.45        | -0.46 | -0.44 | -0.45   | -0.44             | -0.31        | -0.43             | -0.34            | -0.46         | -0.41      | -0.45          | -0.38       | -0.28             | -0.27         | -0.33             | 1.27      | 35.94         | -0.51        | -0.46   | -0.39    | -0.47 | -0.58     | -0.2      | -0.42        | -0.48          |
|             | Run2_MDS13  | -0.36       | -0.4         | -0.42 | -0.4  | -0.41   | -0.39             | -0.36        | -0.38             | -0.33            | -0.39         | -0.37      | -0.39          | -0.38       | -0.17             | -0.21         | -0.24             | 1.92      | 63            | -0.3         | -0.38   | -0.3     | -0.17 | -0.42     | -0.24     | -0.36        | -0.4           |
|             | Run2_MDS16  | -0.36       | -0.36        | -0.39 | -0.37 | -0.47   | -0.4              | -0.41        | -0.42             | -0.41            | -0.35         | -0.37      | -0.38          | -0.37       | -0.25             | -0.22         | -0.31             | -0.31     | 69.92         | -0.26        | -0.4    | -0.43    | -0.36 | -0.42     | -0.26     | -0.37        | -0.41          |
|             | Run2_MDS1   | -0.38       | -0.41        | -0.49 | -0.47 | -0.4    | -0.38             | -0.33        | -0.41             | -0.4             | -0.32         | -0.39      | -0.41          | -0.4        | -0.24             | -0.33         | -0.28             | -0.28     | 84.39         | -0.17        | -0.38   | -0.25    | -0.43 | -0.46     | -0.28     | -0.28        | -0.4           |
|             | Run2_MDS21  | -0.35       | -0.41        | -0.36 | -0.43 | -0.41   | -0.39             | -0.28        | -0.42             | -0.29            | -0.4          | -0.37      | -0.41          | -0.39       | -0.16             | -0.24         | -0.29             | 4.32      | 74.97         | -0.68        | -0.37   | -0.26    | -0.18 | -0.41     | -0.19     | -0.3         | -0.4           |
|             | Run2_MDS26* | -0.38       | -0.33        | -0.29 | -0.34 | -0.32   | -0.34             | -0.37        | -0.37             | -0.36            | -0.37         | -0.35      | -0.42          | -0.41       | -0.25             | -0.29         | -0.31             | -0.29     | 53.1          | -0.36        | -0.35   | -0.43    | -0.41 | -0.41     | -0.29     | -0.23        | -0.41          |
|             | Run2_MDS27  | -0.31       | -0.31        | -0.32 | -0.31 | -0.27   | -0.28             | -0.27        | -0.41             | -0.38            | -0.29         | -0.28      | -0.36          | -0.36       | -0.12             | -0.2          | -0.37             | -0.2      | 88.44         | -0.43        | -0.33   | -0.4     | -0.44 | -0.38     | -0.18     | -0.28        | -0.38          |
|             | Run2_MDS2   | -0.41       | -0.4         | -0.51 | -0.39 | -0.45   | -0.44             | -0.41        | -0.4              | -0.39            | -0.2          | -0.33      | -0.41          | -0.4        | -0.42             | -0.26         | -0.26             | -0.39     | 34.67         | -0.4         | -0.41   | -0.43    | -0.41 | -0.43     | -0.22     | -0.43        | -0.41          |
|             | Run2_MDS3   | -0.34       | -0.4         | -0.43 | -0.38 | -0.41   | -0.39             | -0.34        | -0.34             | -0.28            | -0.38         | -0.35      | -0.37          | -0.36       | -0.11             | -0.18         | -0.28             | 2.75      | 82.2          | -0.35        | -0.37   | -0.22    | -0.4  | -0.43     | -0.19     | -0.3         | -0.39          |
|             | Lower Risk  | Run1_MDS23  | -0.43        | -0.44 | -0.44 | -0.47   | -0.46             | -0.43        | -0.4              | -0.46            | -0.48         | -0.43      | -0.4           | -0.44       | -0.44             | -0.37         | -0.36             | -0.37     | -0.29         | 73.76        | -0.44   | -0.41    | -0.42 | -0.47     | -0.53     | -0.19        | -0.27          |
| Run1_MDS25  |             | -0.39       | -0.21        | -0.38 | -0.42 | -0.32   | -0.41             | -0.42        | -0.43             | -0.45            | -0.35         | -0.38      | -0.44          | -0.39       | -0.34             | -0.22         | -0.2              | -0.36     | 50.96         | -0.59        | -0.45   | -0.38    | -0.41 | -0.48     | -0.36     | -0.45        | -0.46          |
| Run1_MDS5   |             | -0.38       | -0.15        | -0.36 | -0.13 | -0.17   | -0.28             | -0.36        | -0.38             | -0.35            | -0.21         | -0.34      | -0.4           | -0.39       | -0.35             | -0.22         | -0.22             | -0.33     | 76.15         | -0.43        | -0.38   | -0.39    | -0.35 | -0.45     | -0.21     | -0.29        | -0.4           |
| Run1_MDS6   |             | -0.36       | -0.4         | -0.44 | -0.42 | -0.45   | -0.4              | -0.4         | -0.46             | -0.46            | -0.36         | -0.36      | -0.41          | -0.36       | -0.2              | -0.33         | -0.34             | 0.32      | 58.68         | -0.49        | -0.41   | -0.46    | -0.42 | -0.47     | -0.32     | -0.36        | -0.45          |
| Run1_MDS8   |             | -0.4        | -0.41        | -0.5  | -0.42 | -0.4    | -0.4              | -0.39        | -0.46             | -0.44            | -0.37         | -0.41      | -0.43          | -0.41       | -0.28             | -0.22         | -0.32             | -0.31     | 60.93         | -0.39        | -0.46   | -0.45    | -0.27 | -0.48     | -0.32     | -0.41        | -0.48          |
| Run1_MDS9   |             | -0.41       | -0.39        | -0.36 | -0.42 | -0.38   | -0.39             | -0.44        | -0.42             | -0.37            | -0.36         | -0.38      | -0.45          | -0.43       | -0.36             | -0.31         | -0.33             | -0.3      | 86.86         | -0.43        | -0.42   | -0.45    | -0.6  | -0.45     | -0.3      | -0.33        | -0.47          |
| Run2_MDS12  |             | -0.37       | -0.4         | -0.2  | -0.4  | -0.35   | -0.35             | -0.34        | -0.37             | -0.38            | -0.39         | -0.38      | -0.4           | -0.39       | -0.11             | -0.26         | -0.32             | -0.26     | 152.79        | -0.43        | -0.22   | -0.28    | -0.41 | -0.41     | -0.32     | -0.06        | -0.3           |
| Run2_MDS14  |             | -0.33       | -0.18        | -0.49 | -0.48 | -0.05   | -0.37             | -0.46        | -0.4              | -0.4             | -0.34         | -0.35      | -0.36          | -0.34       | -0.2              | -0.29         | -0.25             | 0.83      | 109.08        | -0.35        | -0.35   | -0.4     | -0.29 | -0.4      | -0.34     | -0.3         | -0.36          |
| Run2_MDS19  |             | -0.36       | -0.32        | -0.25 | -0.32 | -0.33   | -0.33             | -0.33        | -0.36             | -0.41            | -0.31         | -0.31      | -0.38          | -0.38       | 0                 | -0.23         | -0.32             | -0.26     | 126.91        | -0.49        | -0.36   | -0.4     | -0.44 | -0.46     | -0.31     | -0.25        | -0.38          |
| Run2_MDS20  |             | -0.37       | -0.54        | -0.63 | -0.41 | -0.4    | -0.4              | -0.38        | -0.44             | -0.42            | -0.27         | -0.29      | -0.37          | -0.36       | 0.04              | -0.02         | -0.31             | -0.31     | 188.42        | -0.39        | -0.39   | -0.38    | -0.37 | -0.41     | -0.27     | -0.35        | -0.4           |
| Run2_MDS28* | -0.4        | -0.42       | -0.32        | -0.41 | -0.42 | -0.41   | -0.41             | -0.42        | -0.41             | -0.39            | -0.39         | -0.41      | -0.41          | -0.3        | -0.29             | -0.4          | -0.32             | 72.19     | -0.25         | -0.32        | -0.43   | -0.41    | -0.4  | -0.24     | -0.23     | -0.37        |                |
| Run2_MDS5   | -0.34       | -0.15       | -0.23        | -0.28 | -0.31 | -0.4    | -0.5              | -0.38        | -0.11             | -0.15            | -0.33         | -0.38      | -0.34          | -0.06       | -0.13             | -0.24         | -0.29             | 115.83    | -0.29         | -0.35        | -0.34   | -0.35    | -0.4  | -0.18     | -0.26     | -0.39        |                |
| ICUS        | Run1_ICU518 | -0.4        | -0.32        | -0.36 | -0.32 | -0.38   | -0.43             | -0.44        | -0.48             | -0.46            | -0.31         | -0.31      | -0.41          | -0.4        | -0.19             | -0.23         | -0.36             | -0.31     | 78.81         | -0.56        | -0.45   | -0.47    | -0.49 | -0.48     | -0.3      | -0.38        | -0.46          |
|             | Run1_ICU522 | -0.44       | -0.32        | -0.3  | -0.32 | -0.3    | -0.43             | -0.46        | -0.46             | -0.48            | -0.41         | -0.4       | -0.46          | -0.46       | -0.36             | -0.4          | -0.41             | 0.06      | 87.69         | -0.36        | -0.41   | -0.43    | -0.45 | -0.5      | -0.33     | -0.28        | -0.45          |
|             | Run1_ICU524 | -0.38       | -0.38        | -0.37 | -0.45 | -0.29   | -0.31             | -0.39        | -0.44             | -0.46            | -0.4          | -0.36      | -0.42          | -0.38       | -0.39             | -0.35         | 1.3               | 66.04     | -0.39         | -0.44        | -0.47   | -0.69    | -0.45 | -0.33     | -0.41     | -0.45        |                |
|             | Run1_NI-1   | -0.39       | -0.39        | -0.31 | -0.53 | -0.28   | -0.34             | -0.39        | -0.47             | -0.46            | -0.36         | -0.35      | -0.42          | -0.42       | -0.32             | -0.35         | -0.35             | 1.63      | 74.29         | -0.47        | -0.46   | -0.47    | -0.39 | -0.33     | -0.3      | -0.43        | -0.47          |
| Normal      | Run1_NI-3   | -0.27       | -0.38        | -0.37 | -0.44 | -0.28   | -0.33             | -0.34        | -0.39             | -0.45            | -0.19         | -0.22      | -0.3           | -0.25       | -0.11             | -0.21         | -0.24             | 0.41      | 48.86         | -0.5         | -0.46   | -0.47    | -0.43 | -0.46     | -0.44     | -0.47        | -0.46          |
|             | Run1_NI-4   | -0.24       | -0.42        | -0.49 | -0.39 | -0.38   | -0.31             | -0.27        | -0.37             | -0.42            | -0.13         | -0.16      | -0.21          | -0.18       | -0.18             | -0.18         | 1.07              | 37.98     | -0.46         | -0.44        | -0.45   | -0.34    | -0.45 | -0.45     | -0.43     | -0.45        |                |
|             | Run1_NI-6   | -0.31       | -0.45        | -0.49 | -0.46 | -0.3    | -0.28             | -0.35        | -0.36             | -0.43            | -0.24         | -0.26      | -0.36          | -0.34       | -0.15             | -0.28         | -0.32             | 1.75      | 39.6          | -0.42        | -0.44   | -0.44    | -0.39 | -0.44     | -0.45     | -0.38        | -0.46          |
|             | Run2_NI-3   | -0.25       | -0.36        | -0.37 | -0.38 | -0.32   | -0.32             | -0.27        | -0.35             | -0.38            | -0.18         | -0.22      | -0.27          | -0.22       | -0.09             | -0.09         | -0.23             | 0.47      | 58.55         | -0.41        | -0.4    | -0.41    | -0.37 | -0.39     | -0.38     | -0.38        | -0.41          |
|             | Run2_NI-4   | -0.21       | -0.34        | -0.36 | -0.32 | -0.23   | -0.29             | -0.27        | -0.35             | -0.37            | -0.13         | -0.16      | -0.23          | -0.18       | -0.01             | -0.05         | -0.19             | 0.7       | 46.52         | -0.35        | -0.39   | -0.43    | -0.31 | -0.42     | -0.38     | -0.39        | -0.4           |
|             | Run2_NI-5   | -0.25       | -0.27        | -0.32 | -0.22 | -0.3    | -0.25             | -0.29        | -0.35             | -0.36            | -0.13         | -0.2       | -0.29          | -0.23       | -0.08             | -0.14         | -0.23             | 1.8       | 65.94         | -0.36        | -0.41   | -0.42    | -0.3  | -0.4      | -0.36     | -0.4         | -0.41          |
|             | Run2_NI-6   | -0.29       | -0.38        | -0.42 | -0.37 | -0.31   | -0.3              | -0.28        | -0.38             | -0.37            | -0.21         | -0.23      | -0.33          | -0.31       | 0.04              | -0.17         | -0.26             | 1.76      | 48.04         | -0.39        | -0.37   | -0.4     | -0.36 | -0.43     | -0.29     | -0.29        | -0.4           |

Supplemental Table 3: Median expression of each surface marker on each cell population.

|             |             | CD69 Median |              |       |       |         |                   |              |                   |                  |               |            |                 |             |                   |               |                   |           |               |              |         |          |       |           |           |              |                |
|-------------|-------------|-------------|--------------|-------|-------|---------|-------------------|--------------|-------------------|------------------|---------------|------------|-----------------|-------------|-------------------|---------------|-------------------|-----------|---------------|--------------|---------|----------|-------|-----------|-----------|--------------|----------------|
|             |             | Ungated     | CD34+CD38low | HSCs  | MPP   | CMP/GMP | Myelo/Mono-Blasts | ProMonocytes | CD14neg Monocytes | Mature Monocytes | ProMyelocytes | Myelocytes | MetaMyelocyte s | MatureGrans | ProTryptroblast s | Erythroblasts | LateErythroblasts | PreBcells | Mature Bcells | Plasma Cells | T cells | NK cells | pDCs  | Basophils | Platelets | CD8+ T cells | CD8neg T cells |
| Run1_MD517  |             | -0.27       | -0.13        | -0.05 | -0.15 | 0.06    | -0.25             | -0.24        | -0.25             | -0.28            | -0.4          | -0.34      | -0.31           | -0.25       | -0.37             | -0.44         | -0.31             | -0.18     | -0.02         | -0.53        | -0.15   | -0.06    | -0.3  | -0.21     | 13.4      | -0.06        | -0.24          |
| Run2_MD515* | AML/RAEB-T  | -0.25       | -0.02        | -0.15 | -0.21 | -0.14   | -0.16             | -0.24        | -0.35             | -0.28            | -0.25         | -0.16      | -0.29           | -0.36       | -0.26             | -0.13         | -0.23             | -0.04     | -0.52         | -0.11        | 0.34    | -0.08    | -0.08 | 1.41      | 0.21      | -0.23        |                |
| Run2_MD54   |             | -0.23       | 1.44         | 1.03  | 1.53  | 4.27    | -0.06             | -0.22        | -0.31             | -0.17            | -0.35         | -0.36      | -0.38           | -0.39       | -0.36             | -0.34         | 0.05              | 0.83      | 1.38          | -0.39        | 0.14    | 0.68     | 2.64  | 0.17      | 22.34     | 0.32         | 0.01           |
| Run1_MD521  |             | -0.3        | -0.14        | -0.06 | -0.17 | -0.13   | -0.16             | -0.22        | -0.26             | -0.33            | -0.43         | -0.4       | -0.44           | -0.41       | -0.43             | -0.36         | 25.33             | 0.38      | -0.11         | -0.5         | -0.26   | 1.42     | -0.32 | 0.22      | 37.56     | -0.15        | -0.3           |
| Run1_MD53   |             | -0.32       | 0.04         | -0.01 | 0.02  | 0.12    | 0.03              | -0.13        | -0.26             | -0.1             | -0.44         | -0.42      | -0.45           | -0.34       | -0.43             | -0.37         | 0.79              | 0.45      | 0.07          | -0.42        | -0.21   | 0.97     | -0.34 | 0.56      | 31.93     | -0.11        | -0.25          |
| Run2_MD516  |             | -0.31       | -0.1         | -0.04 | -0.12 | -0.1    | -0.15             | -0.3         | -0.33             | -0.02            | -0.4          | -0.37      | -0.39           | -0.36       | -0.34             | -0.4          | -0.3              | 0.34      | -0.03         | -0.36        | -0.2    | 0.94     | -0.39 | -0.15     | 28.9      | -0.15        | -0.22          |
| Run2_MD516  |             | -0.33       | 1            | 1.19  | 0.85  | 0.62    | -0.21             | -0.36        | -0.35             | -0.29            | -0.33         | -0.39      | -0.41           | -0.41       | 0.36              | -0.41         | -0.22             | -0.15     | -0.08         | -0.43        | -0.22   | -0.11    | -0.23 | -0.13     | 28.5      | -0.12        | -0.24          |
| Run2_MD51   |             | -0.23       | 0.58         | 1.64  | 0.48  | 0.38    | -0.03             | 0.11         | -0.25             | -0.23            | -0.38         | -0.4       | -0.39           | -0.38       | -0.31             | -0.37         | -0.24             | 0.31      | 0.49          | -0.36        | 0.01    | 0.51     | 0.02  | 0.17      | 19.83     | 1.89         | -0.08          |
| Run2_MD521  |             | -0.27       | -0.14        | -0.17 | -0.14 | -0.09   | -0.16             | -0.43        | -0.26             | -0.21            | -0.38         | -0.36      | -0.39           | -0.38       | -0.41             | -0.29         | 0.46              | 0.19      | -0.27         | -0.21        | 0.93    | 1.14     | -0.15 | 43.37     | -0.1      | -0.25        |                |
| Run2_MD526* | Higher Risk | -0.37       | 1.64         | 2.6   | 1.58  | 0.89    | -0.09             | -0.32        | -0.34             | -0.35            | -0.36         | -0.37      | -0.38           | -0.36       | -0.26             | -0.42         | -0.39             | -0.1      | 0.03          | -0.41        | 0       | 0.43     | -0.32 | 0.26      | -0.23     | 0.87         | -0.15          |
| Run2_MD527  |             | -0.23       | 1.72         | 2.01  | 1.39  | 1.25    | 0.55              | -0.16        | -0.43             | -0.35            | -0.32         | -0.34      | -0.41           | -0.42       | 1.04              | -0.41         | -0.39             | 0.43      | 0.01          | -0.4         | 0.01    | -0.02    | -0.46 | 0.35      | 13.43     | 0.23         | -0.07          |
| Run2_MD52   |             | -0.33       | -0.3         | -0.12 | -0.32 | -0.32   | -0.33             | -0.35        | -0.38             | -0.22            | -0.3          | -0.36      | -0.39           | -0.39       | -0.22             | -0.24         | 0.44              | -0.24     | 0.24          | -0.29        | -0.23   | -0.14    | -0.37 | -0.44     | 41.68     | -0.12        | -0.23          |
| Run2_MD53   |             | -0.29       | 0.31         | 0.45  | 0.24  | 0.36    | 0.01              | -0.22        | -0.29             | -0.1             | -0.4          | -0.39      | -0.38           | -0.39       | -0.31             | -0.41         | -0.4              | 0.63      | 0.38          | -0.32        | -0.19   | 0.66     | 0.44  | 0.81      | 36.67     | -0.11        | -0.22          |
| Run1_MD523  |             | -0.38       | 0.71         | 1.4   | 0.73  | 0.36    | -0.33             | -0.32        | -0.37             | -0.3             | -0.38         | -0.41      | -0.43           | -0.44       | -0.42             | -0.38         | -0.01             | -0.14     | 0.14          | -0.36        | 0.02    | 1.52     | -0.34 | -0.19     | 17.95     | 1.02         | -0.1           |
| Run1_MD525  |             | -0.41       | 0.59         | 1.18  | -0.27 | 1.01    | -0.43             | -0.38        | -0.39             | -0.34            | -0.42         | -0.4       | -0.46           | -0.45       | -0.43             | -0.39         | -0.04             | -0.18     | -0.13         | -0.35        | -0.07   | 2.91     | -0.32 | -0.08     | 16.07     | -0.04        | -0.1           |
| Run1_MD55   |             | -0.18       | 1.14         | -0.19 | 1.05  | 0.75    | 0.12              | 0.04         | -0.09             | 0.28             | -0.25         | -0.31      | -0.34           | -0.31       | -0.35             | -0.28         | 7.34              | 0.14      | 0.16          | -0.45        | 0.16    | 3.72     | 1.78  | 1.13      | 13.77     | 0.53         | 0.04           |
| Run1_MD56   |             | -0.39       | 0.51         | 0.65  | -0.02 | 0.43    | -0.2              | -0.26        | -0.31             | -0.14            | -0.42         | -0.43      | -0.43           | -0.44       | -0.35             | -0.41         | -0.09             | -0.16     | -0.06         | -0.42        | -0.2    | -0.08    | -0.13 | -0.23     | 19.92     | -0.05        | -0.29          |
| Run1_MD58   |             | -0.38       | 1.5          | 1.69  | 0.7   | 0.52    | -0.16             | -0.14        | -0.11             | 0.13             | -0.43         | -0.41      | -0.46           | -0.44       | -0.41             | -0.4          | 0.01              | -0.18     | -0.01         | -0.32        | -0.27   | -0.1     | 0.3   | 0.51      | 25.13     | -0.08        | -0.32          |
| Run1_MD59   |             | -0.34       | 1.11         | 1.91  | 0.72  | 1.01    | 0.15              | 0.1          | 0.37              | 0.64             | -0.4          | -0.41      | -0.45           | -0.46       | -0.34             | -0.37         | 4.59              | -0.05     | 0.11          | -0.3         | -0.22   | 1.01     | -0.12 | 1.02      | 19.1      | 0.09         | -0.31          |
| Run2_MD512  |             | -0.35       | 0.07         | 1.73  | 0.36  | 0.87    | -0.26             | -0.18        | -0.22             | -0.12            | -0.35         | -0.36      | -0.37           | -0.38       | -0.37             | -0.41         | -0.35             | -0.07     | 0.01          | -0.25        | 2.23    | 9.14     | -0.26 | 0.39      | 10.66     | 0.03         | 0.79           |
| Run2_MD514  |             | -0.38       | 0.02         | -0.64 | 0.43  | 0.51    | -0.33             | -0.39        | -0.4              | -0.3             | -0.36         | -0.39      | -0.4            | -0.41       | -0.34             | -0.41         | -0.32             | 0.1       | 0             | -0.61        | -0.11   | -0.05    | -0.43 | -0.04     | 9.69      | 0.19         | -0.18          |
| Run2_MD519  |             | -0.38       | 1.04         | 1.76  | 0.98  | 0.41    | -0.29             | -0.34        | -0.35             | -0.34            | -0.36         | -0.37      | -0.4            | -0.41       | -0.35             | -0.39         | -0.4              | 0.15      | 0             | -0.48        | -0.09   | 0.22     | -0.31 | -0.17     | 26.22     | -0.72        | -0.17          |
| Run2_MD520  |             | -0.29       | 1.07         | 2.02  | 0.73  | 0.43    | -0.35             | -0.38        | -0.36             | -0.31            | -0.34         | -0.34      | -0.41           | -0.41       | -0.35             | -0.37         | -0.23             | 0.08      | 0.28          | -0.3         | 0.14    | 0.27     | -0.37 | 0.15      | 25.1      | 0.01         | 0.16           |
| Run2_MD528* |             | -0.35       | 0.48         | 1.37  | 0.44  | 0.54    | -0.28             | -0.31        | -0.36             | -0.28            | -0.37         | -0.35      | -0.38           | -0.39       | -0.34             | -0.39         | -0.38             | -0.12     | -0.01         | -0.28        | -0.02   | 0.04     | -0.06 | 0.29      | 55.48     | 0.33         | -0.13          |
| Run2_MD55   |             | -0.23       | 0.48         | 0.02  | 0.66  | 0.45    | -0.02             | -0.25        | -0.12             | -0.07            | -0.26         | -0.35      | -0.32           | -0.29       | -0.43             | -0.36         | 1.08              | -0.07     | -0.03         | -0.4         | 0       | 3.38     | 0.37  | 0.86      | 15.12     | 0.16         | -0.04          |
| Run1_ICU518 |             | -0.41       | 0.12         | 0.32  | -0.13 | 0.56    | -0.42             | -0.38        | -0.39             | -0.35            | -0.38         | -0.41      | -0.44           | -0.47       | -0.41             | -0.4          | -0.39             | -0.12     | 0.03          | -0.32        | -0.22   | 0.18     | -0.45 | -0.29     | 14.8      | -0.04        | -0.25          |
| Run1_ICU522 |             | -0.42       | 1.24         | 2.15  | 0.94  | 0.75    | -0.37             | -0.41        | -0.41             | -0.33            | -0.4          | -0.41      | -0.46           | -0.48       | -0.44             | -0.42         | -0.34             | 0.04      | 0.08          | -0.38        | 0.14    | 2.04     | -0.44 | 0.41      | 14.67     | 0.6          | -0.02          |
| Run1_ICU524 | ICUS        | -0.37       | 1.4          | 1.87  | 1.27  | 0.5     | -0.22             | -0.3         | -0.41             | -0.33            | -0.4          | -0.4       | -0.43           | -0.45       | -0.39             | -0.43         | 2.35              | -0.01     | -0.02         | -0.45        | -0.14   | 0.19     | -0.29 | 0.41      | 20.49     | -0.02        | -0.22          |
| Run1_NH-1   |             | -0.38       | 1.44         | 0.75  | 1.33  | 1       | -0.19             | -0.26        | -0.3              | -0.26            | -0.38         | -0.39      | -0.43           | -0.45       | -0.38             | -0.43         | -0.15             | 0.4       | 0.18          | -0.44        | -0.16   | 0.35     | -0.31 | 2.76      | 29.87     | -0.04        | -0.21          |
| Run1_NH-3   |             | -0.37       | 0.72         | 0.86  | 0.68  | 0.23    | -0.28             | -0.32        | -0.35             | -0.31            | -0.38         | -0.39      | -0.41           | -0.42       | -0.35             | -0.42         | -0.33             | -0.16     | -0.06         | -0.49        | -0.25   | -0.04    | -0.39 | 0.14      | 4.89      | -0.1         | -0.33          |
| Run1_NH-4   |             | -0.38       | 0.4          | 1.4   | 0.8   | 0.17    | -0.26             | -0.33        | -0.38             | -0.33            | -0.37         | -0.38      | -0.41           | -0.42       | -0.34             | -0.42         | -0.36             | -0.13     | -0.12         | -0.43        | -0.22   | -0.12    | -0.37 | 0.36      | 5.29      | -0.18        | -0.25          |
| Run1_NH-6   |             | -0.39       | 1            | 1.38  | 0.88  | 0.28    | -0.25             | -0.3         | -0.37             | -0.3             | -0.37         | -0.39      | -0.43           | -0.43       | -0.35             | -0.44         | -0.36             | -0.06     | -0.06         | -0.46        | -0.15   | -0.05    | -0.35 | -0.07     | 6.45      | 0.5          | -0.23          |
| Run2_NH-3   |             | -0.36       | 0.33         | 0.83  | 0.08  | -0.01   | -0.29             | -0.29        | -0.33             | -0.3             | -0.35         | -0.37      | -0.39           | -0.38       | -0.29             | -0.41         | -0.36             | -0.19     | -0.13         | -0.4         | -0.26   | -0.08    | -0.39 | -0.01     | 5.66      | -0.16        | -0.32          |
| Run2_NH-4   | Normal      | -0.36       | 0.41         | 0.91  | 0.15  | -0.05   | -0.28             | -0.28        | -0.35             | -0.33            | -0.33         | -0.36      | -0.39           | -0.38       | -0.32             | -0.39         | -0.38             | -0.08     | -0.15         | -0.42        | -0.22   | -0.15    | -0.3  | 0.29      | 6.07      | -0.21        | -0.23          |
| Run2_NH-5   |             | -0.34       | 0.37         | 0.31  | 0.29  | -0.26   | -0.26             | -0.27        | -0.35             | -0.32            | -0.33         | -0.37      | -0.4            | -0.39       | -0.3              | -0.4          | -0.38             | -0.02     | -0.07         | -0.42        | -0.24   | -0.09    | -0.35 | -0.08     | 8.48      | -0.21        | -0.27          |
| Run2_NH-6   |             | -0.38       | 0.68         | 1     | 0.64  | 0.26    | -0.24             | -0.31        | -0.37             | -0.31            | -0.35         | -0.38      | -0.4            | -0.4        | -0.33             | -0.4          | -0.39             | -0.09     | -0.1          | -0.43        | -0.16   | -0.04    | -0.33 | -0.07     | 8.06      | 0.51         | -0.24          |

**Supplemental Table 4:** Most common surface marker aberrancies by cell type.

Number indicates the number of samples (of 23 in total; from MDS and sAML) which demonstrated aberrant expression within the indicated group of cell populations (columns) for each marker (rows). HSPC = HSC, MPP and CD33+MPP (all CD34+CD38low).

Boxes are colored from green (no aberrancy) to red (maximum for each cell type).

The final column on the right is a sum of the first four groups with a possible score of up to 92 (23x4).

Note that the analysis includes samples MDS3, MDS13, and MDS21 which came from serial biopsies of the same patient (each several months apart) and demonstrate consistent properties.

|              | HSPC | Blasts | Monocyte Lineage | Granulocyte Lineage | Other | Total: Progenitor, Monocyte, and Granulocyte |
|--------------|------|--------|------------------|---------------------|-------|----------------------------------------------|
| CD45RA       | 2    | 0      | 0                | 0                   | 1     | 2                                            |
| CD7          | 3    | 0      | 0                | 0                   | 14    | 3                                            |
| CD71         | 1    | 2      | 0                | 1                   | 19    | 4                                            |
| CD235        | 4    | 0      | 0                | 0                   | 16    | 4                                            |
| CD47         | 8    | 1      | 2                | 6                   | 10    | 17                                           |
| CD8          | 4    | 0      | 0                | 1                   | 9     | 5                                            |
| CD34         | 16   | 8      | 1                | 0                   | 6     | 25                                           |
| CD117        | 11   | 5      | 0                | 0                   | 3     | 16                                           |
| CD56         | 0    | 0      | 2                | 2                   | 8     | 4                                            |
| CD90         | 3    | 0      | 0                | 0                   | 0     | 3                                            |
| CD33         | 3    | 13     | 1                | 2                   | 7     | 19                                           |
| CD64         | 5    | 2      | 2                | 5                   | 5     | 14                                           |
| CD16         | 5    | 0      | 3                | 3                   | 11    | 11                                           |
| CD11b        | 6    | 0      | 8                | 8                   | 19    | 22                                           |
| CD15         | 5    | 0      | 0                | 18                  | 18    | 23                                           |
| CD123        | 2    | 0      | 0                | 1                   | 10    | 3                                            |
| CD3          | 0    | 0      | 0                | 0                   | 6     | 0                                            |
| CD45         | 11   | 4      | 3                | 2                   | 19    | 20                                           |
| CD133        | 1    | 0      | 0                | 0                   | 0     | 1                                            |
| HLADR        | 13   | 1      | 12               | 2                   | 14    | 28                                           |
| CD44         | 11   | 10     | 6                | 9                   | 20    | 36                                           |
| CD38         | 3    | 0      | 15               | 3                   | 13    | 21                                           |
| CD14         | 1    | 0      | 0                | 0                   | 4     | 1                                            |
| Calreticulin | 1    | 0      | 0                | 0                   | 3     | 1                                            |
| CD321        | 7    | 10     | 11               | 5                   | 20    | 33                                           |
| CD99         | 4    | 5      | 1                | 2                   | 18    | 12                                           |
| CD13         | 0    | 0      | 2                | 1                   | 4     | 3                                            |
| CXCR4        | 1    | 0      | 0                | 2                   | 8     | 3                                            |
| CD10         | 3    | 0      | 0                | 1                   | 0     | 4                                            |
| CD19         | 0    | 0      | 0                | 0                   | 4     | 0                                            |
| CD20         | 0    | 0      | 0                | 0                   | 5     | 0                                            |
| CD69         | 0    | 0      | 0                | 0                   | 7     | 0                                            |

**Supplemental Table 5:** Frequency of surface marker aberrancies by sample. Number of marker aberrancies is shown for each marker and population (HSPC, Blasts, Monocytes, Granulocytes, and Other), in each sample. Samples MDS3, 13 & 21 are serial samples from the same patient each several months apart.

|                  |        | AML/RAEB-T |       |      | Higher Risk MDS |       |      |       |       |       |      |      |  |
|------------------|--------|------------|-------|------|-----------------|-------|------|-------|-------|-------|------|------|--|
|                  |        | MDS17      | MDS15 | MDS4 | MDS13           | MDS16 | MDS1 | MDS21 | MDS26 | MDS27 | MDS2 | MDS3 |  |
| CD45RA<br>Median | HSPC   | 0          | 0     | 0    | 0               | 0     | 0    | 0     | 0     | 0     | 0    | 0    |  |
|                  | Blasts | 0          | 0     | 0    | 0               | 0     | 0    | 0     | 0     | 0     | 0    | 0    |  |
|                  | Mono   | 0          | 0     | 0    | 0               | 0     | 0    | 0     | 0     | 0     | 0    | 0    |  |
|                  | Gran   | 0          | 0     | 0    | 0               | 0     | 0    | 0     | 0     | 0     | 0    | 0    |  |
|                  | Other  | 0          | 0     | 0    | 0               | 0     | 0    | 0     | 0     | 0     | 0    | 0    |  |
| CD7<br>Median    | HSPC   | 0          | 0     | 3    | 0               | 0     | 0    | 0     | 0     | 0     | 0    | 0    |  |
|                  | Blasts | 0          | 0     | 0    | 0               | 0     | 0    | 0     | 0     | 0     | 0    | 0    |  |
|                  | Mono   | 0          | 0     | 0    | 0               | 0     | 0    | 0     | 0     | 0     | 0    | 0    |  |
|                  | Gran   | 0          | 0     | 0    | 0               | 0     | 0    | 0     | 0     | 0     | 0    | 0    |  |
|                  | Other  | 2          | 0     | 1    | 0               | 4     | 1    | 2     | 0     | 1     | 2    | 1    |  |
| CD71<br>Median   | HSPC   | 0          | 0     | 0    | 0               | 0     | 0    | 0     | 0     | 0     | 0    | 0    |  |
|                  | Blasts | 0          | 0     | 0    | 0               | 0     | 0    | 0     | 0     | 0     | 1    | 0    |  |
|                  | Mono   | 0          | 0     | 0    | 0               | 0     | 0    | 0     | 0     | 0     | 0    | 0    |  |
|                  | Gran   | 0          | 0     | 0    | 0               | 0     | 0    | 0     | 0     | 0     | 0    | 0    |  |
|                  | Other  | 2          | 1     | 0    | 3               | 2     | 1    | 1     | 1     | 2     | 1    | 1    |  |
| CD235<br>Median  | HSPC   | 0          | 0     | 0    | 0               | 0     | 0    | 0     | 0     | 0     | 0    | 0    |  |
|                  | Blasts | 0          | 0     | 0    | 0               | 0     | 0    | 0     | 0     | 0     | 0    | 0    |  |
|                  | Mono   | 0          | 0     | 0    | 0               | 0     | 0    | 0     | 0     | 0     | 0    | 0    |  |
|                  | Gran   | 0          | 0     | 0    | 0               | 0     | 0    | 0     | 0     | 0     | 0    | 0    |  |
|                  | Other  | 1          | 1     | 2    | 1               | 2     | 1    | 1     | 1     | 2     | 1    | 1    |  |
| CD47<br>Median   | HSPC   | 0          | 0     | 0    | 2               | 0     | 1    | 2     | 0     | 0     | 2    | 1    |  |
|                  | Blasts | 0          | 0     | 0    | 0               | 0     | 0    | 0     | 0     | 0     | 0    | 0    |  |
|                  | Mono   | 0          | 0     | 0    | 0               | 0     | 0    | 0     | 0     | 0     | 0    | 0    |  |
|                  | Gran   | 1          | 0     | 0    | 0               | 0     | 1    | 0     | 0     | 0     | 0    | 0    |  |
|                  | Other  | 0          | 2     | 1    | 1               | 0     | 0    | 1     | 1     | 0     | 1    | 1    |  |
| CD8<br>Median    | HSPC   | 0          | 0     | 0    | 0               | 0     | 0    | 0     | 0     | 0     | 0    | 0    |  |
|                  | Blasts | 0          | 0     | 0    | 0               | 0     | 0    | 0     | 0     | 0     | 0    | 0    |  |
|                  | Mono   | 0          | 0     | 0    | 0               | 0     | 0    | 0     | 0     | 0     | 0    | 0    |  |
|                  | Gran   | 3          | 0     | 0    | 0               | 0     | 0    | 0     | 0     | 0     | 0    | 0    |  |
|                  | Other  | 1          | 2     | 1    | 0               | 0     | 0    | 1     | 0     | 1     | 0    | 0    |  |
| CD34<br>Median   | HSPC   | 1          | 3     | 0    | 0               | 0     | 2    | 1     | 2     | 0     | 0    | 0    |  |
|                  | Blasts | 1          | 1     | 0    | 1               | 0     | 0    | 1     | 0     | 1     | 1    | 1    |  |
|                  | Mono   | 0          | 0     | 0    | 0               | 0     | 0    | 0     | 0     | 0     | 0    | 0    |  |
|                  | Gran   | 0          | 0     | 0    | 0               | 0     | 0    | 0     | 0     | 0     | 0    | 0    |  |
|                  | Other  | 1          | 4     | 0    | 0               | 1     | 0    | 1     | 0     | 1     | 0    | 0    |  |

**Supplemental Table 5:** Frequency of surface marker aberrancies by sample. Number of marker aberrancies is shown for each marker and population (HSPC, Blasts, Monocytes, Granulocytes, and Other), in each sample. Samples MDS3, 13 & 21 are serial samples from the same patient each several months apart.

|       |                | AML/RAEB-T |       |      | Higher Risk MDS |       |      |       |       |       |      |      |
|-------|----------------|------------|-------|------|-----------------|-------|------|-------|-------|-------|------|------|
|       |                | MDS17      | MDS15 | MDS4 | MDS13           | MDS16 | MDS1 | MDS21 | MDS26 | MDS27 | MDS2 | MDS3 |
| CD117 | HSPC           | 4          | 4     | 3    | 0               | 0     | 3    | 3     | 4     | 0     | 0    | 0    |
|       | Median Blasts  | 1          | 0     | 0    | 1               | 0     | 0    | 1     | 1     | 0     | 0    | 1    |
|       | Mono           | 0          | 0     | 0    | 0               | 0     | 0    | 0     | 0     | 0     | 0    | 0    |
|       | Gran           | 0          | 0     | 0    | 0               | 0     | 0    | 0     | 0     | 0     | 0    | 0    |
|       | Other          | 0          | 3     | 0    | 0               | 0     | 0    | 1     | 0     | 0     | 0    | 0    |
| CD56  | HSPC           | 0          | 0     | 0    | 0               | 0     | 0    | 0     | 0     | 0     | 0    | 0    |
|       | Median Blasts  | 0          | 0     | 0    | 0               | 0     | 0    | 0     | 0     | 0     | 0    | 0    |
|       | Mono           | 0          | 0     | 0    | 0               | 0     | 0    | 0     | 0     | 0     | 0    | 0    |
|       | Gran           | 0          | 1     | 0    | 0               | 0     | 0    | 0     | 0     | 0     | 0    | 0    |
|       | Other          | 0          | 1     | 0    | 0               | 0     | 1    | 0     | 0     | 0     | 0    | 0    |
| CD90  | HSPC           | 0          | 0     | 0    | 0               | 0     | 0    | 0     | 0     | 0     | 0    | 0    |
|       | Median Blasts  | 0          | 0     | 0    | 0               | 0     | 0    | 0     | 0     | 0     | 0    | 0    |
|       | Mono           | 0          | 0     | 0    | 0               | 0     | 0    | 0     | 0     | 0     | 0    | 0    |
|       | Gran           | 0          | 0     | 0    | 0               | 0     | 0    | 0     | 0     | 0     | 0    | 0    |
|       | Other          | 0          | 0     | 0    | 0               | 0     | 0    | 0     | 0     | 0     | 0    | 0    |
| CD33  | HSPC           | 0          | 2     | 2    | 0               | 0     | 0    | 0     | 0     | 0     | 0    | 0    |
|       | Median Blasts  | 1          | 0     | 1    | 1               | 0     | 1    | 1     | 1     | 1     | 1    | 1    |
|       | Mono           | 0          | 0     | 1    | 0               | 0     | 0    | 0     | 0     | 0     | 0    | 0    |
|       | Gran           | 0          | 3     | 1    | 0               | 0     | 0    | 0     | 0     | 0     | 0    | 0    |
|       | Other          | 0          | 6     | 0    | 1               | 0     | 0    | 0     | 0     | 0     | 0    | 0    |
| CD64  | HSPC           | 0          | 0     | 0    | 0               | 0     | 1    | 0     | 0     | 0     | 0    | 0    |
|       | Medians Blasts | 0          | 0     | 0    | 0               | 0     | 0    | 0     | 0     | 0     | 0    | 0    |
|       | Mono           | 0          | 0     | 0    | 0               | 0     | 0    | 0     | 0     | 0     | 3    | 0    |
|       | Gran           | 1          | 0     | 1    | 0               | 0     | 0    | 0     | 0     | 0     | 1    | 0    |
|       | Other          | 0          | 1     | 0    | 0               | 0     | 0    | 0     | 0     | 0     | 2    | 1    |
| CD16  | HSPC           | 0          | 0     | 0    | 0               | 0     | 0    | 0     | 0     | 0     | 0    | 0    |
|       | Median Blasts  | 0          | 0     | 0    | 0               | 0     | 0    | 0     | 0     | 0     | 0    | 0    |
|       | Mono           | 0          | 1     | 0    | 0               | 0     | 0    | 0     | 0     | 0     | 0    | 0    |
|       | Gran           | 0          | 0     | 0    | 0               | 0     | 0    | 0     | 0     | 0     | 0    | 0    |
|       | Other          | 0          | 1     | 0    | 0               | 1     | 0    | 0     | 2     | 2     | 1    | 0    |
| CD11b | HSPC           | 0          | 0     | 0    | 0               | 0     | 0    | 0     | 0     | 0     | 0    | 0    |
|       | Median Blasts  | 0          | 0     | 0    | 0               | 0     | 0    | 0     | 0     | 0     | 0    | 0    |
|       | Mono           | 0          | 1     | 0    | 0               | 0     | 2    | 1     | 2     | 0     | 1    | 0    |
|       | Gran           | 1          | 0     | 0    | 2               | 0     | 3    | 1     | 1     | 0     | 1    | 1    |
|       | Other          | 1          | 3     | 1    | 1               | 0     | 1    | 1     | 1     | 0     | 2    | 1    |

**Supplemental Table 5:** Fequency of surface marker aberrancies by sample. Number of marker abberancies is shown for each marker and population (HSPC, Blasts, Monocytes, Granulocytes, and Other), in each sample. Samples MDS3, 13 & 21 are serial samples from the same patient each several months apart.

|                 |        | AML/RAEB-T |       |      | Higher Risk MDS |       |      |       |       |       |      |      |
|-----------------|--------|------------|-------|------|-----------------|-------|------|-------|-------|-------|------|------|
|                 |        | MDS17      | MDS15 | MDS4 | MDS13           | MDS16 | MDS1 | MDS21 | MDS26 | MDS27 | MDS2 | MDS3 |
| CD15<br>Median  | HSPC   | 0          | 0     | 0    | 0               | 0     | 0    | 0     | 0     | 0     | 0    | 0    |
|                 | Blasts | 0          | 0     | 0    | 0               | 0     | 0    | 0     | 0     | 0     | 0    | 0    |
|                 | Mono   | 0          | 0     | 0    | 0               | 0     | 0    | 0     | 0     | 0     | 0    | 0    |
|                 | Gran   | 1          | 2     | 0    | 1               | 1     | 2    | 1     | 1     | 1     | 1    | 1    |
|                 | Other  | 1          | 1     | 1    | 1               | 1     | 1    | 1     | 2     | 1     | 1    | 1    |
| CD123<br>Median | HSPC   | 0          | 0     | 0    | 0               | 0     | 0    | 0     | 0     | 0     | 0    | 0    |
|                 | Blasts | 0          | 0     | 0    | 0               | 0     | 0    | 0     | 0     | 0     | 0    | 0    |
|                 | Mono   | 0          | 0     | 0    | 0               | 0     | 0    | 0     | 0     | 0     | 0    | 0    |
|                 | Gran   | 0          | 1     | 0    | 0               | 0     | 0    | 0     | 0     | 0     | 0    | 0    |
|                 | Other  | 1          | 1     | 0    | 1               | 0     | 0    | 0     | 1     | 1     | 1    | 0    |
| CD3<br>Median   | HSPC   | 0          | 0     | 0    | 0               | 0     | 0    | 0     | 0     | 0     | 0    | 0    |
|                 | Blasts | 0          | 0     | 0    | 0               | 0     | 0    | 0     | 0     | 0     | 0    | 0    |
|                 | Mono   | 0          | 0     | 0    | 0               | 0     | 0    | 0     | 0     | 0     | 0    | 0    |
|                 | Gran   | 0          | 0     | 0    | 0               | 0     | 0    | 0     | 0     | 0     | 0    | 0    |
|                 | Other  | 0          | 0     | 0    | 0               | 1     | 0    | 0     | 0     | 1     | 0    | 0    |
| CD45<br>Median  | HSPC   | 1          | 1     | 0    | 2               | 0     | 0    | 3     | 0     | 0     | 2    | 2    |
|                 | Blasts | 0          | 0     | 0    | 0               | 0     | 0    | 0     | 0     | 0     | 0    | 0    |
|                 | Mono   | 0          | 0     | 0    | 0               | 0     | 0    | 0     | 0     | 0     | 0    | 0    |
|                 | Gran   | 0          | 0     | 0    | 0               | 0     | 0    | 0     | 0     | 0     | 0    | 0    |
|                 | Other  | 1          | 5     | 2    | 2               | 0     | 2    | 4     | 0     | 2     | 7    | 0    |
| CD133<br>Median | HSPC   | 0          | 0     | 0    | 0               | 0     | 0    | 0     | 0     | 0     | 0    | 0    |
|                 | Blasts | 0          | 0     | 0    | 0               | 0     | 0    | 0     | 0     | 0     | 0    | 0    |
|                 | Mono   | 0          | 0     | 0    | 0               | 0     | 0    | 0     | 0     | 0     | 0    | 0    |
|                 | Gran   | 0          | 0     | 0    | 0               | 0     | 0    | 0     | 0     | 0     | 0    | 0    |
|                 | Other  | 0          | 0     | 0    | 0               | 0     | 0    | 0     | 0     | 0     | 0    | 0    |
| HLADR<br>Median | HSPC   | 0          | 2     | 4    | 1               | 0     | 3    | 0     | 0     | 4     | 4    | 0    |
|                 | Blasts | 0          | 0     | 0    | 0               | 0     | 0    | 0     | 0     | 0     | 0    | 0    |
|                 | Mono   | 0          | 0     | 3    | 0               | 0     | 2    | 0     | 0     | 2     | 3    | 0    |
|                 | Gran   | 0          | 1     | 0    | 0               | 0     | 0    | 0     | 0     | 0     | 1    | 0    |
|                 | Other  | 0          | 5     | 1    | 1               | 1     | 0    | 0     | 0     | 2     | 2    | 0    |
| CD44<br>Median  | HSPC   | 4          | 4     | 0    | 1               | 0     | 3    | 0     | 0     | 0     | 4    | 0    |
|                 | Blasts | 0          | 0     | 0    | 0               | 1     | 0    | 0     | 1     | 1     | 1    | 0    |
|                 | Mono   | 0          | 0     | 1    | 0               | 1     | 0    | 0     | 1     | 0     | 1    | 0    |
|                 | Gran   | 2          | 4     | 3    | 3               | 0     | 0    | 1     | 0     | 0     | 2    | 3    |
|                 | Other  | 1          | 7     | 4    | 2               | 1     | 3    | 2     | 0     | 3     | 4    | 3    |



**Supplemental Table 5:** Frequency of surface marker aberrancies by sample. Number of marker aberrancies is shown for each marker and population (HSPC, Blasts, Monocytes, Granulocytes, and Other), in each sample. Samples MDS3, 13 & 21 are serial samples from the same patient each several months apart.

|                |        | AML/RAEB-T |       |      | Higher Risk MDS |       |      |       |       |       |      |      |
|----------------|--------|------------|-------|------|-----------------|-------|------|-------|-------|-------|------|------|
|                |        | MDS17      | MDS15 | MDS4 | MDS13           | MDS16 | MDS1 | MDS21 | MDS26 | MDS27 | MDS2 | MDS3 |
| CD19<br>Median | HSPC   | 0          | 0     | 0    | 0               | 0     | 0    | 0     | 0     | 0     | 0    | 0    |
|                | Blasts | 0          | 0     | 0    | 0               | 0     | 0    | 0     | 0     | 0     | 0    | 0    |
|                | Mono   | 0          | 0     | 0    | 0               | 0     | 0    | 0     | 0     | 0     | 0    | 0    |
|                | Gran   | 0          | 0     | 0    | 0               | 0     | 0    | 0     | 0     | 0     | 0    | 0    |
|                | Other  | 0          | 1     | 0    | 0               | 0     | 0    | 1     | 0     | 0     | 0    | 1    |
| CD20<br>Median | HSPC   | 0          | 0     | 0    | 0               | 0     | 0    | 0     | 0     | 0     | 0    | 0    |
|                | Blasts | 0          | 0     | 0    | 0               | 0     | 0    | 0     | 0     | 0     | 0    | 0    |
|                | Mono   | 0          | 0     | 0    | 0               | 0     | 0    | 0     | 0     | 0     | 0    | 0    |
|                | Gran   | 0          | 0     | 0    | 0               | 0     | 0    | 0     | 0     | 0     | 0    | 0    |
|                | Other  | 0          | 1     | 0    | 0               | 0     | 0    | 0     | 0     | 0     | 0    | 0    |
| CD69<br>Median | HSPC   | 0          | 0     | 0    | 0               | 0     | 0    | 0     | 0     | 0     | 0    | 0    |
|                | Blasts | 0          | 0     | 0    | 0               | 0     | 0    | 0     | 0     | 0     | 0    | 0    |
|                | Mono   | 0          | 0     | 0    | 0               | 0     | 0    | 0     | 0     | 0     | 0    | 0    |
|                | Gran   | 0          | 0     | 0    | 0               | 0     | 0    | 0     | 0     | 0     | 0    | 0    |
|                | Other  | 0          | 0     | 1    | 0               | 0     | 0    | 1     | 0     | 0     | 0    | 0    |





**Supplemental Table 5:** Fequency of surface marker aberrancies by sample. Number of marker aberrancies is shown for each marker and population (HSPC, Blasts, Monocytes, Granulocytes, and Other), in each sample. Samples MDS3, 13 & 21 are serial samples from the same patient each several months apart.

|       |        | Lower Risk MDS |       |      |      |      |      |       |       |       |       |       | ICUS  |        |        |        |
|-------|--------|----------------|-------|------|------|------|------|-------|-------|-------|-------|-------|-------|--------|--------|--------|
|       |        | MDS23          | MDS25 | MDS5 | MDS6 | MDS8 | MDS9 | MDS12 | MDS14 | MDS19 | MDS20 | MDS28 | MDS11 | ICUS18 | ICUS22 | ICUS24 |
| CD117 | HSPC   | 1              | 0     | 0    | 0    | 2    | 0    | 4     | 0     | 0     | 0     | 3     | 1     | 0      | 0      | 0      |
|       | Median |                |       |      |      |      |      |       |       |       |       |       |       |        |        |        |
|       | Blasts | 0              | 0     | 0    | 0    | 0    | 0    | 0     | 0     | 0     | 0     | 0     | 0     | 0      | 0      | 0      |
|       | Mono   | 0              | 0     | 0    | 0    | 0    | 0    | 0     | 0     | 0     | 0     | 0     | 0     | 0      | 0      | 0      |
|       | Gran   | 0              | 0     | 0    | 0    | 0    | 0    | 0     | 0     | 0     | 0     | 0     | 0     | 0      | 0      | 0      |
| Other | 0      | 0              | 0     | 0    | 0    | 0    | 0    | 0     | 0     | 0     | 1     | 0     | 0     | 0      | 0      |        |
| CD56  | HSPC   | 0              | 0     | 0    | 0    | 0    | 0    | 0     | 0     | 0     | 0     | 0     | 0     | 0      | 0      | 0      |
|       | Median |                |       |      |      |      |      |       |       |       |       |       |       |        |        |        |
|       | Blasts | 0              | 0     | 0    | 0    | 0    | 0    | 0     | 0     | 0     | 0     | 0     | 0     | 0      | 0      | 0      |
|       | Mono   | 0              | 0     | 0    | 1    | 0    | 0    | 3     | 0     | 0     | 0     | 0     | 0     | 0      | 0      | 0      |
|       | Gran   | 0              | 0     | 0    | 2    | 0    | 0    | 0     | 0     | 0     | 0     | 0     | 0     | 0      | 0      | 0      |
| Other | 0      | 0              | 1     | 0    | 0    | 0    | 1    | 1     | 1     | 1     | 0     | 0     | 0     | 0      | 0      |        |
| CD90  | HSPC   | 0              | 1     | 0    | 2    | 0    | 0    | 0     | 1     | 0     | 0     | 0     | 0     | 0      | 0      | 0      |
|       | Median |                |       |      |      |      |      |       |       |       |       |       |       |        |        |        |
|       | Blasts | 0              | 0     | 0    | 0    | 0    | 0    | 0     | 0     | 0     | 0     | 0     | 0     | 0      | 0      | 0      |
|       | Mono   | 0              | 0     | 0    | 0    | 0    | 0    | 0     | 0     | 0     | 0     | 0     | 0     | 0      | 0      | 0      |
|       | Gran   | 0              | 0     | 0    | 0    | 0    | 0    | 0     | 0     | 0     | 0     | 0     | 0     | 0      | 0      | 0      |
| Other | 0      | 0              | 0     | 0    | 0    | 0    | 0    | 0     | 0     | 0     | 0     | 0     | 0     | 0      | 0      |        |
| CD33  | HSPC   | 0              | 0     | 0    | 2    | 0    | 0    | 0     | 0     | 0     | 0     | 0     | 0     | 0      | 0      | 0      |
|       | Median |                |       |      |      |      |      |       |       |       |       |       |       |        |        |        |
|       | Blasts | 1              | 0     | 0    | 0    | 1    | 1    | 0     | 0     | 0     | 0     | 0     | 1     | 0      | 0      | 0      |
|       | Mono   | 0              | 0     | 0    | 0    | 0    | 0    | 0     | 0     | 0     | 0     | 0     | 0     | 0      | 0      | 0      |
|       | Gran   | 0              | 0     | 0    | 0    | 0    | 0    | 0     | 0     | 0     | 0     | 0     | 0     | 0      | 0      | 0      |
| Other | 0      | 0              | 1     | 2    | 0    | 0    | 1    | 0     | 0     | 0     | 3     | 0     | 0     | 0      | 0      |        |
| CD64  | HSPC   | 0              | 1     | 2    | 0    | 1    | 0    | 0     | 0     | 0     | 0     | 0     | 1     | 0      | 0      | 0      |
|       | Median |                |       |      |      |      |      |       |       |       |       |       |       |        |        |        |
|       | Blasts | 0              | 0     | 0    | 0    | 0    | 0    | 1     | 0     | 0     | 0     | 1     | 0     | 0      | 0      | 0      |
|       | Mono   | 0              | 0     | 3    | 0    | 0    | 0    | 0     | 0     | 0     | 0     | 0     | 0     | 0      | 0      | 0      |
|       | Gran   | 1              | 0     | 4    | 0    | 0    | 0    | 0     | 0     | 0     | 0     | 0     | 0     | 0      | 0      | 0      |
| Other | 0      | 0              | 2     | 0    | 0    | 0    | 2    | 0     | 0     | 0     | 3     | 0     | 0     | 0      | 0      |        |
| CD16  | HSPC   | 0              | 3     | 2    | 0    | 1    | 0    | 0     | 2     | 0     | 1     | 0     | 0     | 0      | 0      | 0      |
|       | Median |                |       |      |      |      |      |       |       |       |       |       |       |        |        |        |
|       | Blasts | 0              | 0     | 0    | 0    | 0    | 0    | 0     | 0     | 0     | 0     | 0     | 0     | 0      | 0      | 0      |
|       | Mono   | 0              | 0     | 0    | 0    | 0    | 1    | 0     | 0     | 0     | 1     | 0     | 0     | 0      | 0      | 0      |
|       | Gran   | 0              | 0     | 1    | 0    | 0    | 0    | 0     | 1     | 0     | 1     | 0     | 0     | 0      | 0      | 0      |
| Other | 0      | 1              | 1     | 0    | 1    | 2    | 0    | 1     | 0     | 1     | 0     | 0     | 2     | 0      | 0      |        |
| CD11b | HSPC   | 0              | 3     | 2    | 0    | 1    | 0    | 0     | 2     | 0     | 1     | 0     | 2     | 0      | 0      | 0      |
|       | Median |                |       |      |      |      |      |       |       |       |       |       |       |        |        |        |
|       | Blasts | 0              | 0     | 0    | 0    | 0    | 0    | 0     | 0     | 0     | 0     | 0     | 0     | 0      | 0      | 0      |
|       | Mono   | 0              | 0     | 1    | 0    | 0    | 0    | 0     | 0     | 0     | 0     | 2     | 0     | 0      | 1      | 0      |
|       | Gran   | 0              | 0     | 0    | 0    | 0    | 0    | 2     | 0     | 0     | 0     | 2     | 0     | 0      | 1      | 0      |
| Other | 2      | 1              | 3     | 1    | 1    | 1    | 1    | 0     | 2     | 0     | 3     | 1     | 1     | 1      | 0      |        |

**Supplemental Table 5:** Fequency of surface marker aberrancies by sample. Number of marker aberrancies is shown for each marker and population (HSPC, Blasts, Monocytes, Granulocytes, and Other), in each sample. Samples MDS3, 13 & 21 are serial samples from the same patient each several months apart.

|       |        | Lower Risk MDS |       |      |      |      |      |       |       |       |       |       | ICUS  |        |        |        |
|-------|--------|----------------|-------|------|------|------|------|-------|-------|-------|-------|-------|-------|--------|--------|--------|
|       |        | MDS23          | MDS25 | MDS5 | MDS6 | MDS8 | MDS9 | MDS12 | MDS14 | MDS19 | MDS20 | MDS28 | MDS11 | ICUS18 | ICUS22 | ICUS24 |
| CD15  | HSPC   | 0              | 3     | 1    | 0    | 1    | 0    | 0     | 1     | 0     | 1     | 0     | 0     | 0      | 0      | 0      |
|       | Median | 0              | 0     | 0    | 0    | 0    | 0    | 0     | 0     | 0     | 0     | 0     | 0     | 0      | 0      | 0      |
|       | Blasts | 0              | 0     | 0    | 0    | 0    | 0    | 0     | 0     | 0     | 0     | 0     | 0     | 0      | 0      | 0      |
|       | Mono   | 0              | 0     | 0    | 0    | 0    | 0    | 0     | 0     | 0     | 0     | 0     | 0     | 0      | 0      | 0      |
|       | Gran   | 0              | 0     | 1    | 1    | 1    | 1    | 0     | 2     | 4     | 1     | 1     | 1     | 1      | 4      | 1      |
| Other | 1      | 0              | 2     | 0    | 1    | 1    | 1    | 0     | 1     | 0     | 0     | 2     | 1     | 1      | 1      |        |
| CD123 | HSPC   | 1              | 0     | 0    | 0    | 0    | 0    | 3     | 0     | 0     | 0     | 0     | 0     | 0      | 0      | 0      |
|       | Median | 0              | 0     | 0    | 0    | 0    | 0    | 0     | 0     | 0     | 0     | 0     | 0     | 0      | 0      | 0      |
|       | Blasts | 0              | 0     | 0    | 0    | 0    | 0    | 0     | 0     | 0     | 0     | 0     | 0     | 0      | 0      | 0      |
|       | Mono   | 0              | 0     | 0    | 0    | 0    | 0    | 0     | 0     | 0     | 0     | 0     | 0     | 0      | 0      | 0      |
|       | Gran   | 0              | 0     | 0    | 0    | 0    | 0    | 0     | 0     | 0     | 0     | 0     | 0     | 0      | 0      | 0      |
| Other | 0      | 1              | 0     | 0    | 0    | 1    | 0    | 0     | 0     | 0     | 1     | 0     | 1     | 1      | 0      |        |
| CD3   | HSPC   | 0              | 0     | 0    | 0    | 0    | 0    | 0     | 0     | 0     | 0     | 0     | 0     | 0      | 0      | 0      |
|       | Median | 0              | 0     | 0    | 0    | 0    | 0    | 0     | 0     | 0     | 0     | 0     | 0     | 0      | 0      | 0      |
|       | Blasts | 0              | 0     | 0    | 0    | 0    | 0    | 0     | 0     | 0     | 0     | 0     | 0     | 0      | 0      | 0      |
|       | Mono   | 0              | 0     | 0    | 0    | 0    | 0    | 0     | 0     | 0     | 0     | 0     | 0     | 0      | 0      | 0      |
|       | Gran   | 0              | 0     | 0    | 0    | 0    | 0    | 0     | 0     | 0     | 0     | 0     | 0     | 0      | 0      | 0      |
| Other | 0      | 0              | 0     | 0    | 1    | 1    | 0    | 0     | 0     | 1     | 0     | 1     | 0     | 0      | 0      |        |
| CD45  | HSPC   | 0              | 4     | 3    | 0    | 1    | 0    | 0     | 3     | 0     | 0     | 0     | 2     | 0      | 0      | 0      |
|       | Median | 0              | 1     | 0    | 0    | 0    | 0    | 0     | 1     | 0     | 1     | 0     | 1     | 1      | 1      | 0      |
|       | Blasts | 0              | 0     | 0    | 0    | 2    | 2    | 0     | 1     | 0     | 0     | 0     | 0     | 0      | 2      | 0      |
|       | Mono   | 0              | 0     | 0    | 0    | 2    | 2    | 0     | 1     | 0     | 0     | 0     | 0     | 0      | 0      | 0      |
|       | Gran   | 0              | 1     | 4    | 0    | 0    | 0    | 0     | 0     | 0     | 0     | 0     | 0     | 0      | 0      | 0      |
| Other | 2      | 1              | 7     | 3    | 1    | 2    | 0    | 0     | 1     | 3     | 3     | 1     | 1     | 1      | 0      |        |
| CD133 | HSPC   | 0              | 0     | 0    | 0    | 1    | 0    | 0     | 0     | 0     | 0     | 0     | 0     | 0      | 0      | 0      |
|       | Median | 0              | 0     | 0    | 0    | 0    | 0    | 0     | 0     | 0     | 0     | 0     | 0     | 0      | 0      | 0      |
|       | Blasts | 0              | 0     | 0    | 0    | 0    | 0    | 0     | 0     | 0     | 0     | 0     | 0     | 0      | 0      | 0      |
|       | Mono   | 0              | 0     | 0    | 0    | 0    | 0    | 0     | 0     | 0     | 0     | 0     | 0     | 0      | 0      | 0      |
|       | Gran   | 0              | 0     | 0    | 0    | 0    | 0    | 0     | 0     | 0     | 0     | 0     | 0     | 0      | 0      | 0      |
| Other | 0      | 0              | 0     | 0    | 0    | 0    | 0    | 0     | 0     | 0     | 0     | 0     | 0     | 0      | 0      |        |
| HLADR | HSPC   | 2              | 1     | 1    | 3    | 0    | 1    | 4     | 0     | 0     | 0     | 1     | 0     | 0      | 0      | 0      |
|       | Median | 0              | 0     | 0    | 0    | 0    | 0    | 0     | 0     | 0     | 0     | 1     | 0     | 0      | 0      | 0      |
|       | Blasts | 0              | 0     | 0    | 0    | 0    | 0    | 0     | 0     | 0     | 0     | 1     | 0     | 0      | 0      | 0      |
|       | Mono   | 3              | 0     | 0    | 2    | 2    | 2    | 0     | 1     | 2     | 3     | 3     | 0     | 2      | 3      | 0      |
|       | Gran   | 0              | 0     | 0    | 0    | 0    | 0    | 0     | 0     | 0     | 0     | 0     | 0     | 0      | 0      | 0      |
| Other | 4      | 3              | 2     | 2    | 0    | 0    | 1    | 0     | 0     | 2     | 2     | 1     | 0     | 1      | 0      |        |
| CD44  | HSPC   | 1              | 1     | 3    | 0    | 0    | 0    | 0     | 3     | 0     | 1     | 0     | 1     | 0      | 0      | 0      |
|       | Median | 1              | 1     | 0    | 1    | 0    | 0    | 0     | 1     | 0     | 1     | 1     | 0     | 1      | 0      | 0      |
|       | Blasts | 0              | 0     | 0    | 0    | 0    | 0    | 0     | 1     | 0     | 1     | 0     | 0     | 0      | 0      | 0      |
|       | Mono   | 0              | 0     | 0    | 0    | 0    | 0    | 0     | 1     | 0     | 1     | 0     | 0     | 0      | 0      | 0      |
|       | Gran   | 0              | 0     | 3    | 1    | 0    | 0    | 0     | 0     | 0     | 0     | 0     | 0     | 0      | 0      | 0      |
| Other | 3      | 1              | 4     | 2    | 0    | 1    | 3    | 0     | 1     | 1     | 2     | 1     | 1     | 0      | 0      |        |

**Supplemental Table 5:** Frequency of surface marker aberrancies by sample. Number of marker aberrancies is shown for each marker and population (HSPC, Blasts, Monocytes, Granulocytes, and Other), in each sample. Samples MDS3, 13 & 21 are serial samples from the same patient each several months apart.

|       |        | Lower Risk MDS |       |      |      |      |      |       |       |       |       |       | ICUS  |        |        |        |
|-------|--------|----------------|-------|------|------|------|------|-------|-------|-------|-------|-------|-------|--------|--------|--------|
|       |        | MDS23          | MDS25 | MDS5 | MDS6 | MDS8 | MDS9 | MDS12 | MDS14 | MDS19 | MDS20 | MDS28 | MDS11 | ICUS18 | ICUS22 | ICUS24 |
| CD38  | HSPC   | 0              | 0     | 0    | 0    | 0    | 0    | 0     | 0     | 0     | 0     | 0     | 1     | 0      | 0      | 0      |
|       | Median | 0              | 0     | 0    | 0    | 0    | 0    | 0     | 0     | 0     | 0     | 0     | 0     | 1      | 0      | 0      |
|       | Blasts | 0              | 0     | 2    | 0    | 0    | 2    | 1     | 0     | 0     | 1     | 1     | 1     | 1      | 2      | 0      |
|       | Mono   | 0              | 0     | 0    | 0    | 0    | 0    | 0     | 0     | 0     | 0     | 0     | 0     | 0      | 0      | 0      |
|       | Gran   | 0              | 1     | 2    | 0    | 1    | 0    | 0     | 2     | 1     | 0     | 3     | 1     | 0      | 3      | 0      |
| Other | 0      | 0              | 0     | 0    | 0    | 0    | 0    | 0     | 0     | 0     | 0     | 0     | 0     | 0      | 0      |        |
| CD14  | HSPC   | 0              | 0     | 0    | 0    | 0    | 0    | 0     | 0     | 0     | 0     | 0     | 1     | 0      | 0      | 0      |
|       | Median | 0              | 0     | 0    | 0    | 0    | 0    | 0     | 0     | 0     | 0     | 0     | 0     | 0      | 0      | 0      |
|       | Blasts | 0              | 0     | 0    | 0    | 0    | 0    | 0     | 0     | 0     | 0     | 0     | 0     | 0      | 0      | 0      |
|       | Mono   | 0              | 0     | 0    | 0    | 0    | 0    | 0     | 0     | 0     | 0     | 0     | 0     | 0      | 0      | 0      |
|       | Gran   | 0              | 1     | 0    | 0    | 0    | 0    | 0     | 0     | 0     | 0     | 0     | 0     | 0      | 0      | 0      |
| Other | 0      | 0              | 0     | 0    | 0    | 0    | 0    | 0     | 0     | 0     | 0     | 0     | 0     | 0      | 0      |        |
| CD321 | HSPC   | 1              | 0     | 0    | 0    | 0    | 0    | 2     | 0     | 0     | 0     | 0     | 0     | 0      | 0      | 0      |
|       | Median | 0              | 0     | 0    | 1    | 0    | 1    | 0     | 0     | 0     | 0     | 0     | 0     | 0      | 0      | 0      |
|       | Blasts | 0              | 0     | 0    | 3    | 1    | 3    | 0     | 0     | 3     | 2     | 1     | 0     | 0      | 1      | 0      |
|       | Mono   | 0              | 0     | 1    | 0    | 0    | 0    | 0     | 1     | 0     | 0     | 0     | 0     | 0      | 0      | 0      |
|       | Gran   | 1              | 0     | 1    | 1    | 0    | 2    | 0     | 1     | 1     | 2     | 2     | 1     | 1      | 0      | 1      |
| Other | 0      | 0              | 0     | 0    | 0    | 0    | 0    | 0     | 0     | 0     | 0     | 0     | 0     | 0      | 0      |        |
| CD99  | HSPC   | 0              | 0     | 0    | 0    | 0    | 0    | 0     | 0     | 0     | 0     | 0     | 0     | 0      | 0      | 0      |
|       | Median | 0              | 0     | 0    | 0    | 0    | 0    | 0     | 0     | 0     | 0     | 0     | 0     | 0      | 0      | 0      |
|       | Blasts | 0              | 0     | 0    | 0    | 0    | 0    | 0     | 0     | 0     | 0     | 0     | 0     | 0      | 0      | 0      |
|       | Mono   | 0              | 0     | 0    | 0    | 0    | 0    | 0     | 0     | 0     | 0     | 0     | 0     | 0      | 0      | 0      |
|       | Gran   | 0              | 0     | 0    | 0    | 0    | 0    | 0     | 0     | 0     | 0     | 0     | 0     | 0      | 0      | 0      |
| Other | 0      | 1              | 3     | 3    | 4    | 2    | 0    | 0     | 1     | 3     | 0     | 3     | 2     | 0      | 1      |        |
| CD13  | HSPC   | 0              | 0     | 0    | 0    | 0    | 0    | 0     | 0     | 0     | 0     | 0     | 0     | 0      | 0      | 0      |
|       | Median | 0              | 0     | 0    | 0    | 0    | 0    | 0     | 0     | 0     | 0     | 0     | 0     | 0      | 0      | 0      |
|       | Blasts | 0              | 0     | 0    | 0    | 0    | 0    | 0     | 0     | 0     | 0     | 0     | 0     | 0      | 0      | 0      |
|       | Mono   | 0              | 0     | 0    | 0    | 0    | 0    | 0     | 1     | 0     | 0     | 0     | 0     | 0      | 0      | 0      |
|       | Gran   | 0              | 0     | 0    | 0    | 0    | 0    | 0     | 0     | 0     | 0     | 0     | 0     | 0      | 0      | 0      |
| Other | 0      | 1              | 0     | 0    | 0    | 0    | 0    | 0     | 0     | 0     | 1     | 0     | 0     | 1      | 0      |        |
| CXCR4 | HSPC   | 0              | 1     | 0    | 0    | 0    | 0    | 0     | 0     | 0     | 0     | 0     | 0     | 0      | 0      | 0      |
|       | Median | 0              | 0     | 0    | 0    | 0    | 0    | 0     | 0     | 0     | 0     | 0     | 0     | 0      | 0      | 0      |
|       | Blasts | 0              | 0     | 0    | 0    | 0    | 0    | 0     | 0     | 0     | 0     | 0     | 0     | 0      | 0      | 0      |
|       | Mono   | 0              | 0     | 0    | 0    | 0    | 0    | 0     | 0     | 0     | 0     | 0     | 0     | 0      | 0      | 0      |
|       | Gran   | 0              | 0     | 0    | 0    | 0    | 0    | 0     | 0     | 0     | 0     | 0     | 0     | 0      | 0      | 0      |
| Other | 0      | 0              | 2     | 0    | 1    | 1    | 1    | 0     | 0     | 0     | 0     | 0     | 0     | 0      | 1      |        |
| CD10  | HSPC   | 0              | 1     | 0    | 0    | 1    | 0    | 0     | 1     | 0     | 0     | 0     | 0     | 0      | 0      | 0      |
|       | Median | 0              | 0     | 0    | 0    | 0    | 0    | 0     | 0     | 0     | 0     | 0     | 0     | 0      | 0      | 0      |
|       | Blasts | 0              | 0     | 0    | 0    | 0    | 0    | 0     | 0     | 0     | 0     | 0     | 0     | 0      | 0      | 0      |
|       | Mono   | 0              | 0     | 0    | 0    | 0    | 0    | 0     | 0     | 0     | 0     | 0     | 0     | 0      | 0      | 0      |
|       | Gran   | 0              | 1     | 0    | 0    | 0    | 0    | 0     | 0     | 0     | 0     | 0     | 0     | 0      | 0      | 0      |
| Other | 0      | 0              | 0     | 0    | 0    | 0    | 0    | 0     | 0     | 0     | 0     | 0     | 0     | 0      | 0      |        |

**Supplemental Table 5:** Fequency of surface marker aberrancies by sample. Number of marker abberrancies is shown for each marker and population (HSPC, Blasts, Monocytes, Granulocytes, and Other), in each sample. Samples MDS3, 13 & 21 are serial samples from the same patient each several months apart.

|                |        | Lower Risk MDS |       |      |      |      |      |       |       |       |       |       | ICUS  |        |        |        |
|----------------|--------|----------------|-------|------|------|------|------|-------|-------|-------|-------|-------|-------|--------|--------|--------|
|                |        | MDS23          | MDS25 | MDS5 | MDS6 | MDS8 | MDS9 | MDS12 | MDS14 | MDS19 | MDS20 | MDS28 | MDS11 | ICUS18 | ICUS22 | ICUS24 |
| CD19<br>Median | HSPC   | 0              | 0     | 0    | 0    | 0    | 0    | 0     | 0     | 0     | 0     | 0     | 0     | 0      | 0      | 0      |
|                | Blasts | 0              | 0     | 0    | 0    | 0    | 0    | 0     | 0     | 0     | 0     | 0     | 0     | 0      | 0      | 0      |
|                | Mono   | 0              | 0     | 0    | 0    | 0    | 0    | 0     | 0     | 0     | 0     | 0     | 0     | 0      | 0      | 0      |
|                | Gran   | 0              | 0     | 0    | 0    | 0    | 0    | 0     | 0     | 0     | 0     | 0     | 0     | 0      | 0      | 0      |
|                | Other  | 0              | 0     | 0    | 0    | 0    | 0    | 0     | 0     | 1     | 1     | 0     | 0     | 0      | 0      | 0      |
| CD20<br>Median | HSPC   | 0              | 0     | 0    | 0    | 0    | 0    | 0     | 0     | 0     | 0     | 0     | 0     | 0      | 0      | 0      |
|                | Blasts | 0              | 0     | 0    | 0    | 0    | 0    | 0     | 0     | 0     | 0     | 0     | 0     | 0      | 0      | 0      |
|                | Mono   | 0              | 0     | 0    | 0    | 0    | 0    | 0     | 0     | 0     | 0     | 0     | 0     | 0      | 0      | 0      |
|                | Gran   | 0              | 0     | 0    | 0    | 0    | 0    | 0     | 0     | 0     | 0     | 0     | 0     | 0      | 0      | 0      |
|                | Other  | 0              | 0     | 0    | 0    | 0    | 0    | 1     | 1     | 1     | 1     | 0     | 0     | 0      | 0      | 0      |
| CD69<br>Median | HSPC   | 0              | 0     | 0    | 0    | 0    | 0    | 0     | 0     | 0     | 0     | 0     | 0     | 0      | 0      | 0      |
|                | Blasts | 0              | 0     | 0    | 0    | 0    | 0    | 0     | 0     | 0     | 0     | 0     | 0     | 0      | 0      | 0      |
|                | Mono   | 0              | 0     | 0    | 0    | 0    | 0    | 0     | 0     | 0     | 0     | 0     | 0     | 0      | 0      | 0      |
|                | Gran   | 0              | 0     | 0    | 0    | 0    | 0    | 0     | 0     | 0     | 0     | 0     | 0     | 0      | 0      | 0      |
|                | Other  | 0              | 1     | 3    | 0    | 0    | 1    | 3     | 0     | 0     | 0     | 1     | 0     | 0      | 0      | 1      |

**Supplemental Table 6:** Frequency of MDS sample surface marker aberrances in gated cell populations and by using an approximation of the LeukemiaNet criteria. "Yes" indicates the presence of observed aberrancy or aberrancies in the indicated population

|        |                  | Gated aberrancy analysis  |                             |  | Modified European LeukemiaNet MDS criteria |                                             |                               |                                             |                         |
|--------|------------------|---------------------------|-----------------------------|--|--------------------------------------------|---------------------------------------------|-------------------------------|---------------------------------------------|-------------------------|
|        |                  | At least 1 HSPC aberrancy | At least 2 HSPC aberrancies |  | Immature B cell Frequency <normal          | Abnormal Lymphocyte : Myeloblast CD45 ratio | Abnormal Myeloblast Frequency | Immuno-phenotypically abnormal Granulocytes | 2 or more abnormalities |
| MDS17  | AML / RAEB-T     | Yes                       | Yes                         |  | Yes                                        | Yes                                         | Yes                           | Yes                                         | Yes                     |
| MDS15  |                  | Yes                       | Yes                         |  | Yes                                        | Yes                                         | Yes                           | Yes                                         | Yes                     |
| MDS4   |                  | Yes                       | Yes                         |  | No                                         | Yes                                         | Yes                           | Yes                                         | Yes                     |
|        |                  |                           |                             |  |                                            |                                             |                               |                                             |                         |
| MDS13  | Higher Risk MDS  | Yes                       | Yes                         |  | No                                         | Yes                                         | Yes                           | Yes                                         | Yes                     |
| MDS16  |                  | Yes                       | Yes                         |  | Yes                                        | No                                          | Yes                           | No                                          | Yes                     |
| MDS1   |                  | Yes                       | Yes                         |  | Yes                                        | Yes                                         | Yes                           | No                                          | Yes                     |
| MDS21  |                  | Yes                       | Yes                         |  | No                                         | Yes                                         | Yes                           | Yes                                         | Yes                     |
| MDS26  |                  | Yes                       | Yes                         |  | Yes                                        | Yes                                         | No                            | Yes                                         | Yes                     |
| MDS27  |                  | Yes                       | Yes                         |  | Yes                                        | Yes                                         | Yes                           | No                                          | Yes                     |
| MDS2   |                  | Yes                       | Yes                         |  | Yes                                        | Yes                                         | Yes                           | Yes                                         | Yes                     |
| MDS3   |                  | Yes                       | Yes                         |  | No                                         | Yes                                         | Yes                           | Yes                                         | Yes                     |
|        |                  |                           |                             |  |                                            |                                             |                               |                                             |                         |
| MDS23  | Lower Risk MDS   | Yes                       | Yes                         |  | Yes                                        | Yes                                         | Yes                           | Yes                                         | Yes                     |
| MDS25  |                  | Yes                       | Yes                         |  | Yes                                        | No                                          | No                            | Yes                                         | Yes                     |
| MDS5   |                  | Yes                       | Yes                         |  | Yes                                        | No                                          | No                            | Yes                                         | Yes                     |
| MDS6   |                  | Yes                       | Yes                         |  | Yes                                        | Yes                                         | No                            | No                                          | Yes                     |
| MDS8   |                  | Yes                       | Yes                         |  | Yes                                        | No                                          | No                            | No                                          | No                      |
| MDS9   |                  | Yes                       | Yes                         |  | Yes                                        | Yes                                         | Yes                           | No                                          | Yes                     |
| MDS12  |                  | Yes                       | Yes                         |  | Yes                                        | No                                          | Yes                           | Yes                                         | Yes                     |
| MDS14  |                  | Yes                       | Yes                         |  | No                                         | No                                          | No                            | No                                          | No                      |
| MDS19  |                  | Yes                       | No                          |  | Yes                                        | No                                          | No                            | Yes                                         | Yes                     |
| MDS20  |                  | Yes                       | Yes                         |  | Yes                                        | No                                          | No                            | No                                          | No                      |
| MDS28  |                  | Yes                       | Yes                         |  | Yes                                        | Yes                                         | No                            | Yes                                         | Yes                     |
| MDS11  |                  | Yes                       | Yes                         |  | Yes                                        | No                                          | No                            | No                                          | No                      |
|        |                  |                           |                             |  |                                            |                                             |                               |                                             |                         |
| ICUS18 | ICUS             | Yes                       | No                          |  | Yes                                        | No                                          | No                            | No                                          | No                      |
| ICUS22 |                  | No                        | No                          |  | No                                         | No                                          | No                            | Yes                                         | No                      |
| ICUS24 |                  | No                        | No                          |  | No                                         | No                                          | No                            | No                                          | No                      |
|        |                  |                           |                             |  |                                            |                                             |                               |                                             |                         |
| NI-1   | Healthy Controls | No                        | No                          |  | No                                         | No                                          | No                            | No                                          | No                      |
| NI-3   |                  | No                        | No                          |  | No                                         | No                                          | No                            | No                                          | No                      |
| NI-4   |                  | No                        | No                          |  | No                                         | No                                          | No                            | No                                          | No                      |
| NI-6   |                  | No                        | No                          |  | No                                         | No                                          | No                            | No                                          | No                      |
| NI-3   |                  | No                        | No                          |  | No                                         | No                                          | No                            | No                                          | No                      |
| NI-4   |                  | No                        | No                          |  | No                                         | No                                          | No                            | No                                          | No                      |
| NI-5   |                  | No                        | No                          |  | No                                         | No                                          | No                            | No                                          | No                      |
| NI-6   |                  | No                        | No                          |  | No                                         | No                                          | No                            | No                                          | No                      |

**Supplemental Table 7: Immunophenotype of Aberrant Myeloid Cells.**

The normalized expression level of each marker on the gated IAMC population (See Supplemental Figure 1 for gating) is shown.

The expression level of each marker is expressed as a percentage of the average median expression level of that marker in the normal cell population with the highest expression level of the marker.

Percent values of <0 were set to 0 to facilitate heat plot of data.

Note that samples MDS3, MDS13, and MDS21 come from serial biopsies of the same patient (each several months apart) and demonstrate consistent properties.

|        |                    | CD19 | CD3 | CD69 | CD20 | CD133 | CD117 | CD7 | CD123 | CD10 | CD90 | CD34 | CD16  | CXCR4 | CD14 | CD15 | CD71 | CD56 | CD13 | CD45RA | CD235 | HLA-DR | CD8 | CD99 | CD33 | CD321 | CD38 | CD47 | CD45 | CD64  | CD11b | CD44 |      |
|--------|--------------------|------|-----|------|------|-------|-------|-----|-------|------|------|------|-------|-------|------|------|------|------|------|--------|-------|--------|-----|------|------|-------|------|------|------|-------|-------|------|------|
| MDS17  | AML/RAE<br>B-T     | 0.0  | 0.0 | 0.0  | 0.0  | 0.0   | 0.0   | 0.0 | 0.0   | 20.0 | 0.0  | 0.2  | 12.6  | 4.2   | 0.0  | 1.3  | 0.1  | 8.8  | 10.1 | 41.2   | 3.8   | 0.0    | 3.5 | 1.8  | 13.6 | 0.4   | 0.2  | 31.7 | 31.4 | 12.4  | 126.8 | 37.6 |      |
| MDS15* |                    | 0.0  | 0.0 | 0.0  | 0.0  | 0.0   | 0.0   | 0.0 | 1.4   | 14.9 | 0.0  | 0.3  | 5.8   | 9.2   | 1.0  | 1.0  | 0.1  | 12.0 | 13.3 | 31.7   | 2.2   | 0.1    | 1.0 | 3.8  | 23.2 | 2.7   | 0.3  | 13.7 | 14.4 | 2.7   | 41.8  | 48.8 |      |
| MDS4   |                    | 0.0  | 0.0 | 0.0  | 0.0  | 0.0   | 0.0   | 0.0 | 0.0   | 17.0 | 0.0  | 0.0  | 13.9  | 3.0   | 0.1  | 0.8  | 0.0  | 5.4  | 8.3  | 36.0   | 1.8   | 0.1    | 1.1 | 1.5  | 14.2 | 1.2   | 0.1  | 13.8 | 19.6 | 43.7  | 64.1  | 29.2 |      |
| MDS13  | Higher<br>Risk MDS | 0.0  | 0.0 | 0.0  | 0.0  | 0.0   | 0.0   | 0.0 | 0.0   | 0.0  | 0.0  | 0.0  | 8.3   | 0.2   | 0.4  | 1.4  | 0.0  | 9.8  | 10.3 | 27.6   | 2.7   | 0.0    | 1.5 | 2.7  | 15.7 | 0.8   | 1.6  | 20.2 | 24.4 | 4.3   | 88.1  | 42.6 |      |
| MDS16  |                    | 0.0  | 0.0 | 0.0  | 0.0  | 0.0   | 0.0   | 0.0 | 0.0   | 0.0  | 0.0  | 0.2  | 3.4   | 1.0   | 2.3  | 0.1  | 0.3  | 13.6 | 37.1 | 26.0   | 1.6   | 1.1    | 1.2 | 19.7 | 57.4 | 1.3   | 1.5  | 11.9 | 34.4 | 69.5  | 28.7  | 54.3 |      |
| MDS1   |                    | 0.0  | 0.0 | 0.0  | 0.0  | 0.0   | 0.0   | 0.0 | 0.0   | 0.0  | 0.0  | 0.1  | 9.3   | 0.7   | 0.1  | 0.7  | 0.0  | 12.0 | 8.7  | 20.4   | 0.9   | 0.0    | 1.2 | 1.3  | 0.0  | 0.5   | 0.3  | 18.8 | 19.8 | 0.9   | 36.4  | 19.5 |      |
| MDS21  |                    | 0.0  | 0.0 | 0.0  | 0.0  | 0.0   | 0.0   | 0.0 | 0.0   | 0.0  | 0.0  | 0.0  | 0.0   | 7.6   | 0.5  | 0.1  | 1.3  | 0.0  | 5.8  | 5.3    | 16.1  | 1.5    | 0.1 | 0.9  | 0.9  | 11.9  | 0.5  | 1.8  | 18.4 | 17.5  | 4.8   | 86.2 | 23.0 |
| MDS26* |                    | 0.0  | 0.0 | 0.0  | 0.0  | 0.0   | 0.0   | 0.0 | 0.0   | 0.0  | 0.0  | 0.0  | 6.1   | 3.5   | 0.0  | 1.8  | 0.0  | 4.8  | 2.9  | 9.3    | 0.6   | 0.0    | 0.7 | 0.4  | 1.2  | 0.8   | 0.2  | 11.4 | 6.3  | 1.2   | 25.6  | 2.9  |      |
| MDS27  |                    | 0.0  | 0.0 | 0.0  | 0.0  | 0.0   | 0.0   | 0.5 | 0.0   | 1.7  | 0.0  | 0.2  | 14.9  | 0.0   | 1.0  | 0.2  | 0.1  | 8.3  | 19.1 | 28.4   | 1.4   | 0.1    | 1.2 | 7.4  | 0.0  | 0.8   | 1.0  | 8.5  | 21.5 | 1.7   | 16.6  | 18.3 |      |
| MDS2   |                    | 0.0  | 0.0 | 0.0  | 0.0  | 0.0   | 0.0   | 0.0 | 0.0   | 0.0  | 0.0  | 0.0  | 17.9  | 0.0   | 0.0  | 1.5  | 0.0  | 3.7  | 7.7  | 31.0   | 0.9   | 0.0    | 1.1 | 0.3  | 5.1  | 0.1   | 0.8  | 25.3 | 17.3 | 28.3  | 147.9 | 35.0 |      |
| MDS3   | 0.0                | 0.0  | 0.0 | 0.0  | 0.0  | 0.0   | 0.0   | 0.0 | 0.0   | 0.0  | 0.0  | 5.9  | 1.3   | 0.2   | 1.2  | 0.1  | 7.6  | 7.8  | 39.1 | 3.0    | 0.1   | 1.9    | 2.9 | 17.2 | 2.1  | 1.5   | 17.7 | 20.8 | 6.8  | 47.1  | 30.6  |      |      |
| MDS23  | Lower Risk<br>MDS  | 0.0  | 0.0 | 0.0  | 0.0  | 0.0   | 0.0   | 0.0 | 0.0   | 0.0  | 0.0  | 0.0  | 11.1  | 2.3   | 0.0  | 2.0  | 0.1  | 3.1  | 0.0  | 21.3   | 2.2   | 0.0    | 1.9 | 0.6  | 0.1  | 1.5   | 0.1  | 24.9 | 8.2  | 15.7  | 17.2  | 1.2  |      |
| MDS25  |                    | 0.0  | 0.0 | 0.0  | 0.0  | 0.0   | 0.0   | 0.0 | 0.0   | 7.2  | 0.0  | 0.3  | 4.4   | 0.8   | 2.3  | 0.3  | 1.1  | 13.2 | 49.4 | 16.9   | 1.6   | 1.7    | 1.0 | 4.5  | 33.5 | 2.3   | 0.9  | 12.8 | 57.7 | 59.1  | 56.5  | 37.2 |      |
| MDS1   |                    | 0.0  | 0.0 | 0.0  | 0.0  | 0.0   | 0.0   | 0.0 | 0.0   | 1.3  | 0.0  | 0.2  | 125.2 | 0.0   | 0.0  | 1.7  | 0.3  | 11.5 | 11.9 | 39.1   | 4.5   | 0.0    | 1.9 | 0.9  | 5.9  | 0.8   | 0.1  | 31.8 | 78.3 | 354.8 | 54.9  | 58.0 |      |
| MDS6   |                    | 0.0  | 0.0 | 0.0  | 0.0  | 0.0   | 0.0   | 0.0 | 0.0   | 41.6 | 0.0  | 0.4  | 8.4   | 1.9   | 1.0  | 0.4  | 0.2  | 32.1 | 22.6 | 45.6   | 2.5   | 0.8    | 2.1 | 3.0  | 38.6 | 2.2   | 0.4  | 16.1 | 47.9 | 58.4  | 89.1  | 36.0 |      |
| MDS8   |                    | 0.0  | 0.0 | 0.0  | 0.0  | 0.0   | 0.0   | 0.0 | 0.0   | 0.0  | 0.0  | 0.3  | 9.3   | 1.9   | 1.7  | 0.2  | 0.5  | 10.0 | 26.5 | 42.3   | 2.3   | 0.4    | 1.8 | 10.0 | 3.0  | 2.5   | 1.3  | 15.1 | 33.8 | 1.3   | 20.6  | 16.5 |      |
| MDS9   |                    | 0.0  | 0.0 | 0.0  | 0.0  | 0.0   | 0.0   | 0.0 | 0.0   | 0.0  | 0.0  | 0.2  | 11.5  | 1.7   | 0.5  | 1.2  | 0.3  | 9.1  | 21.5 | 29.5   | 2.3   | 0.2    | 1.6 | 2.4  | 0.1  | 1.7   | 0.2  | 18.9 | 23.0 | 5.5   | 19.7  | 4.7  |      |
| MDS12  |                    | 0.0  | 0.0 | 0.0  | 0.0  | 0.0   | 0.0   | 0.0 | 0.0   | 0.0  | 0.0  | 0.0  | 7.0   | 5.4   | 0.1  | 1.9  | 0.1  | 4.4  | 1.1  | 16.9   | 1.8   | 0.0    | 1.2 | 0.9  | 4.1  | 1.6   | 0.4  | 20.5 | 8.2  | 34.1  | 24.1  | 1.5  |      |
| MDS14  |                    | 0.0  | 0.0 | 0.0  | 0.0  | 0.0   | 0.0   | 0.0 | 0.0   | 0.8  | 0.0  | 0.1  | 5.0   | 0.7   | 2.1  | 0.2  | 0.4  | 11.8 | 22.6 | 36.0   | 2.2   | 0.8    | 1.9 | 3.1  | 14.8 | 1.1   | 1.3  | 11.4 | 34.2 | 57.8  | 39.2  | 50.8 |      |
| MDS19  |                    | 0.0  | 0.0 | 0.0  | 0.0  | 0.0   | 0.0   | 0.0 | 0.0   | 0.0  | 0.0  | 0.0  | 5.5   | 2.3   | 1.7  | 0.2  | 0.1  | 10.7 | 18.8 | 30.4   | 1.0   | 0.7    | 1.3 | 3.8  | 13.3 | 1.9   | 1.4  | 11.2 | 23.9 | 8.2   | 34.6  | 28.4 |      |
| MDS20  |                    | 0.0  | 0.0 | 0.0  | 0.0  | 0.0   | 0.0   | 0.3 | 0.0   | 18.3 | 0.0  | 0.1  | 7.4   | 0.0   | 0.4  | 0.4  | 0.0  | 13.4 | 7.7  | 37.8   | 1.8   | 0.2    | 1.1 | 3.6  | 0.3  | 0.6   | 0.5  | 12.2 | 20.3 | 0.7   | 10.6  | 24.0 |      |
| MDS28* |                    | 0.0  | 0.0 | 0.0  | 0.0  | 0.0   | 0.0   | 0.0 | 0.0   | 0.0  | 0.0  | 0.1  | 7.9   | 3.0   | 0.5  | 0.4  | 0.0  | 13.4 | 5.7  | 48.8   | 1.4   | 0.1    | 1.8 | 2.9  | 2.2  | 1.3   | 1.3  | 19.3 | 26.9 | 3.1   | 25.4  | 19.3 |      |
| MDS11  | 0.0                | 0.0  | 0.0 | 0.0  | 0.0  | 0.0   | 0.0   | 0.0 | 5.5   | 0.0  | 0.3  | 5.8  | 1.5   | 1.6   | 0.5  | 0.4  | 10.3 | 59.9 | 48.0 | 3.4    | 1.0   | 2.6    | 8.3 | 6.4  | 3.0  | 1.6   | 16.6 | 48.7 | 65.0 | 56.7  | 37.8  |      |      |
| ICUS18 | ICUS               | 0.0  | 0.0 | 0.0  | 0.0  | 0.0   | 0.0   | 0.0 | 0.0   | 0.0  | 0.2  | 8.8  | 1.6   | 1.4   | 0.2  | 0.4  | 14.6 | 21.2 | 30.8 | 1.6    | 0.3   | 1.9    | 7.4 | 8.3  | 1.5  | 0.9   | 12.9 | 28.8 | 4.0  | 16.9  | 13.8  |      |      |
| ICUS22 |                    | 0.0  | 0.0 | 0.0  | 0.0  | 0.0   | 0.0   | 0.0 | 0.0   | 0.0  | 0.0  | 11.0 | 0.9   | 1.3   | 0.7  | 0.1  | 4.9  | 18.1 | 14.1 | 0.8    | 0.9   | 1.2    | 0.8 | 9.7  | 1.0  | 0.6   | 14.4 | 39.1 | 26.3 | 80.7  | 10.9  |      |      |
| ICUS24 |                    | 0.0  | 0.0 | 0.0  | 0.0  | 0.0   | 0.0   | 0.0 | 0.0   | 0.0  | 0.0  | 0.0  | 5.9   | 2.9   | 1.7  | 0.3  | 0.4  | 6.9  | 34.3 | 18.9   | 1.6   | 1.1    | 1.3 | 1.9  | 14.4 | 1.6   | 0.7  | 13.9 | 38.4 | 76.5  | 40.9  | 17.6 |      |
| NI-1   | Normal             | 0.0  | 0.0 | 0.0  | 0.0  | 0.0   | 0.0   | 0.3 | 0.0   | 0.0  | 0.1  | 4.3  | 3.9   | 1.4   | 0.2  | 1.3  | 6.8  | 19.4 | 21.3 | 2.1    | 1.1   | 1.3    | 3.3 | 58.1 | 1.9  | 0.8   | 13.3 | 36.2 | 71.5 | 30.4  | 18.3  |      |      |
| NI-3   |                    | 0.0  | 0.0 | 0.0  | 0.0  | 0.0   | 5.4   | 0.1 | 0.2   | 0.0  | 11.6 | 0.3  | 4.8   | 4.9   | 2.0  | 0.5  | 0.6  | 19.0 | 40.9 | 108.9  | 6.6   | 1.3    | 4.4 | 6.7  | 27.5 | 2.4   | 1.2  | 13.0 | 37.3 | 45.0  | 28.2  | 22.1 |      |
| NI-4   |                    | 0.0  | 0.0 | 0.0  | 0.0  | 0.0   | 1.0   | 0.0 | 0.1   | 0.0  | 11.4 | 0.2  | 4.9   | 4.2   | 1.4  | 0.8  | 0.4  | 17.6 | 23.7 | 92.0   | 6.7   | 0.6    | 4.0 | 6.9  | 21.3 | 2.8   | 0.9  | 13.1 | 31.5 | 46.4  | 29.4  | 20.4 |      |
| NI-6   |                    | 0.0  | 0.0 | 0.0  | 0.0  | 0.0   | 0.0   | 0.0 | 0.0   | 5.5  | 3.9  | 0.2  | 5.4   | 3.6   | 1.1  | 0.8  | 0.5  | 15.8 | 27.8 | 74.6   | 5.7   | 0.6    | 3.2 | 3.3  | 24.3 | 2.4   | 0.7  | 13.9 | 29.1 | 86.9  | 21.2  | 16.1 |      |
| NI-3   |                    | 0.0  | 0.0 | 0.0  | 0.0  | 0.0   | 0.0   | 0.0 | 0.0   | 2.5  | 7.1  | 0.1  | 2.8   | 3.7   | 1.8  | 0.3  | 0.2  | 16.3 | 32.6 | 64.0   | 5.6   | 1.5    | 3.0 | 4.0  | 21.4 | 2.1   | 1.4  | 9.7  | 28.9 | 36.0  | 33.5  | 42.7 |      |
| NI-4   |                    | 0.0  | 0.0 | 0.0  | 0.0  | 0.0   | 0.0   | 0.0 | 0.0   | 3.4  | 4.8  | 0.1  | 3.1   | 3.6   | 1.3  | 0.7  | 0.1  | 16.7 | 12.8 | 53.4   | 6.2   | 0.6    | 2.6 | 4.4  | 16.5 | 2.5   | 1.1  | 9.0  | 19.7 | 33.6  | 25.2  | 36.7 |      |
| NI-5   |                    | 0.0  | 0.0 | 0.0  | 0.0  | 0.0   | 3.8   | 0.1 | 0.0   | 8.9  | 16.4 | 0.2  | 2.1   | 3.5   | 2.2  | 0.2  | 0.3  | 18.9 | 23.9 | 73.8   | 6.9   | 1.5    | 4.0 | 7.9  | 34.3 | 2.3   | 2.0  | 7.2  | 34.5 | 52.0  | 50.0  | 60.6 |      |
| NI-6   | 0.0                | 0.0  | 0.0 | 0.0  | 0.0  | 0.0   | 0.0   | 0.0 | 0.0   | 0.0  | 0.1  | 3.8  | 2.4   | 1.1   | 0.7  | 0.2  | 13.3 | 23.4 | 43.4 | 4.7    | 0.5   | 1.8    | 1.9 | 17.8 | 2.2  | 1.0   | 11.2 | 18.8 | 78.8 | 22.8  | 23.5  |      |      |

\*CMML
